# Supplementary material for: Targeting NADPH Oxidase and Integrin α5β1 to Inhibit Neutrophil Extracellular Traps-Mediated Metastasis in Colorectal Cancer
Source: Int J Mol Sci. 2023 Nov 6;24(21):16001. doi: 10.3390/ijms242116001 (PMC10650826; doi:10.3390/ijms242116001)
Supplement: Supplementary file 1 [file ijms-24-16001-s001.zip › Supplementary Table S6. Proteomic analysis results.xlsx]

## Sheet: CRC patients vs Healthy donors
Supplementary Table Quantitative proteomic analysis of neutrophils derived from CRC patients and healthy donors ( CRC patients vs Healthy donors, significant changed proteins )
Accession	Name	Description	baseMean	log2FoldChange	Fold Change	lfcSE	stat	pvalue	padj	patient-1	patient-2	patient-3	patient-4	patient-5	patient-6	patient-7	patient-8	patient-9	patient-10	patient-11	patient-12	patient-13	patient-14	patient-15	patient-16	patient-17	patient-18	patient-19	patient-20	patient-21	patient-22	patient-23	patient-24	patient-25	healthy-1	healthy-2	healthy-3	healthy-4	healthy-5	healthy-6	healthy-7	healthy-8
P05534	HLA-A	HLA class I histocompatibility antigen, A-24 alpha chain OS=Homo sapiens OX=9606 GN=HLA-A PE=1 SV=2	375.247	2.57215	5.94694	0.439931	5.84671	5.01405e-09	3.63519e-06	456.451	154.368	1434.42	94.1362	199.299	118.63	390.664	213.721	364.025	799.678	614.822	371.986	883.317	145.985	281.111	202.279	795.438	828.702	132.72	170.112	1005.28	924.463	167.869	111.14	890.143	55.4558	101.802	229.37	54.8641	55.9797	65.4059	30.2669	39.2337
P20339	RAB5A	Ras-related protein Rab-5A OS=Homo sapiens OX=9606 GN=RAB5A PE=1 SV=2	873.391	2.03461	4.09713	0.338514	6.01042	1.8504e-09	2.01231e-06	538.795	561.15	1623.11	1157.26	874.701	539.326	16608.6	870.597	444.34	709.093	702.786	1107.77	1250.52	1237.53	596.266	446.078	340.603	5852.59	601.798	1128.16	1210.04	1213.7	666.388	1048.82	1276.54	332.735	338.667	159.608	301.214	298.558	356.415	144.029	156.935
Q8WUM0	NUP133	Nuclear pore complex protein Nup133 OS=Homo sapiens OX=9606 GN=NUP133 PE=1 SV=2	250.489	1.89623	3.72239	0.290984	6.51661	7.19121e-11	1.56409e-07	301.928	389.05	280.688	78.7879	125.82	278.999	334.44	352.01	593.496	535.716	283.337	126.421	184.988	139.306	179.95	213.99	204.362	641.727	370.805	403.885	319.817	411.773	350.998	225.081	284.311	95.5728	77.6112	60.2492	106.501	99.5195	95.739	58.4464	60.8122
Q8TDG2	ACTRT1	Actin-related protein T1 OS=Homo sapiens OX=9606 GN=ACTRT1 PE=2 SV=2	1880.64	1.54963	2.92742	0.380221	4.07561	4.58946e-05	0.00767852	2335.12	1122.3	1051.41	1602.36	1733.3	1234.63	1568.47	538.492	1611.51	824.028	2042.62	1799.9	2569.48	1739.42	6367.31	9004.59	1261.8	7162.35	610.916	866.214	1056.96	1105.57	2772.38	3447.2	517.103	1156.31	591.659	438.657	597.05	430.214	783.922	1077.08	1040.67
Q99459	CDC5L	Cell division cycle 5-like protein OS=Homo sapiens OX=9606 GN=CDC5L PE=1 SV=2	1912.95	1.2558	2.38799	0.380579	3.2997	0.000967896	0.0404841	1090.81	1325.69	1810.86	646.675	680.435	730.451	3737	968.029	4607.16	2467.22	2233.36	5442.45	909.215	1008.54	1440.57	1171.09	1180.06	13591.8	1393.05	1872.27	1728.77	1436.25	1189.32	1219.74	1786.96	576.977	1170.22	939.676	607.808	987.938	1194.37	983.151	999.478
P43353	ALDH3B1	Aldehyde dehydrogenase family 3 member B1 OS=Homo sapiens OX=9606 GN=ALDH3B1 PE=1 SV=1	1159.35	1.02663	2.03725	0.211441	4.85538	1.20157e-06	0.000522685	1165.02	957.502	1270.14	819.599	1247.13	1198.38	1850.57	1012.03	1894.18	930.198	1360.2	1795.36	993.384	1075.33	813.179	1048.66	1405.38	2907.97	1038.46	820.294	796.618	2218.35	1370.42	1018	2058.87	562.818	721.683	507.362	615.338	378.381	932.744	631.43	843.524
Q8NHP6	MOSPD2	Motile sperm domain-containing protein 2 OS=Homo sapiens OX=9606 GN=MOSPD2 PE=1 SV=1	1887.59	0.873337	1.8319	0.188098	4.64299	3.43396e-06	0.00106698	1506.59	1857.64	2456.73	1838.73	2019.16	2703.22	1827.3	1733.86	2251.95	2017.21	2279.66	2537.51	1890.58	2013.26	1809.23	1558.61	2485.87	1878.2	2247.12	3832.21	3342.48	2681.48	1861.82	1189.85	1207.85	899.093	1033.14	1136.28	865.992	635.473	889.14	1556.13	2247.11
Q13277	STX3	Syntaxin-3 OS=Homo sapiens OX=9606 GN=STX3 PE=1 SV=3	1182.9	0.868422	1.82566	0.240008	3.6183	0.000296541	0.0201555	1751.59	1394.53	780.107	734.672	1850.06	2418.73	1443.42	1184.89	1098.33	1679.23	1498.17	2365.61	1478.98	1523.78	975.62	812.309	1305.82	529.918	937.143	371.533	589.907	2026.43	1526.08	1110.46	1827.03	487.304	834.572	732.504	716.46	578.457	990.567	723.274	758.191
P02750	LRG1	Leucine-rich alpha-2-glycoprotein OS=Homo sapiens OX=9606 GN=LRG1 PE=1 SV=2	1097.93	0.775066	1.71127	0.205519	3.77126	0.000162427	0.01536	951.532	970.018	1390.3	724.439	1168.62	1111.6	2053.17	968.029	1261.05	1429.87	1234.27	2862.2	1109	1103.95	726.608	1404.24	1228.27	756.355	1036.43	1940.11	1448.93	1054.21	1258.51	605.198	726.998	743.344	533.199	641.601	646.535	753.653	1007.63	613.687	767.999
Q96L92	SNX27	Sorting nexin-27 OS=Homo sapiens OX=9606 GN=SNX27 PE=1 SV=2	2154.39	0.747418	1.67879	0.201935	3.70129	0.00021451	0.0172938	3263.27	2102.75	2664.19	1835.66	1834.96	1592.71	2095.82	2136.16	1545.8	1857.47	2546.33	5383.34	2327.15	1912.12	1463.92	1765.15	1909.47	3882.31	1773.99	3830.12	2212.4	3636.58	1747.87	1908.05	2485.34	1301.44	996.85	1114.08	1620.1	1911.6	2240.86	1011.33	1185.84
Q9NW15	ANO10	Anoctamin-10 OS=Homo sapiens OX=9606 GN=ANO10 PE=1 SV=2	1211.06	0.701803	1.62654	0.201137	3.48918	0.000484512	0.0283415	1178.23	1459.2	1735.76	821.645	1776.58	1252.2	2122.96	1246.7	1236.02	1243.83	1058.35	2658.47	874.067	1256.62	1476.56	942.193	1412.71	1166.95	1325.17	1926.54	1446.98	1085.75	798.648	890.052	1002.72	693.788	773.088	1529.48	436.761	665.536	613.298	770.24	1087.75
P14780	MMP9	Matrix metalloproteinase-9 OS=Homo sapiens OX=9606 GN=MMP9 PE=1 SV=3	46332.6	0.66538	1.58599	0.201532	3.30161	0.000961305	0.0404841	27661.5	74988.7	84159.6	42732.7	44698.3	86372.3	45781.4	51372.6	59265.1	34105.6	54944.2	46866.6	42882	48564.4	23518	63793.4	76999.2	37488	89552.4	40904.1	26345	27816.8	70846.7	33799.6	36815.5	37587.3	25699.4	28116.3	37931.5	26224.4	39028.3	22980.9	39134.6
P28065	PSMB9	Proteasome subunit beta type-9 OS=Homo sapiens OX=9606 GN=PSMB9 PE=1 SV=2	4522.91	0.648792	1.56785	0.150984	4.29709	1.73053e-05	0.00418211	4338.82	4537.18	6569.42	3316.25	4411.75	3721.46	10753.4	4502.8	5786.85	5418.52	6612.12	4296.48	5508.94	4651.49	5300.25	4194.62	4947.65	4373.71	4759.68	4045.11	3657.42	3741.1	5314.83	4824.77	4371.53	3077.21	2437.19	3795.7	4185.81	2626.9	3646.61	2483.97	3046.5
E7ER45	MGAM	Maltase-glucoamylase, intestinal OS=Homo sapiens OX=9606 GN=MGAM PE=1 SV=2	8960.79	0.647936	1.56692	0.153587	4.21868	2.45737e-05	0.00534478	10520.7	8605	13432.7	8773.08	9012.74	11897	14380.9	8395.87	11426.6	8303.6	9484.38	11334.2	10515.6	10949.8	5458.8	7832.44	8733.05	16187.9	8108.06	13148.7	8690.65	7189.37	9170.72	7834.88	6170.89	6547.33	7874.01	4322.09	8488.87	6638.78	6410.72	4321.9	5544.7
Q9HCC0	MCCC2	Methylcrotonoyl-CoA carboxylase beta chain, mitochondrial OS=Homo sapiens OX=9606 GN=MCCC2 PE=1 SV=1	964.242	0.645998	1.56482	0.159879	4.04056	5.33248e-05	0.00770184	1257.53	966.889	1421.28	924.99	789.143	906.199	945.155	976.41	938.746	817.21	756.491	2225.55	1147.85	1148.8	1109.85	747.366	664.437	1268.42	835.831	820.294	1053.06	1350.65	1045.87	1046.02	1252.69	795.26	660.199	660.627	699.248	673.83	565.903	643.954	704.245
Q92673	SORL1	Sortilin-related receptor OS=Homo sapiens OX=9606 GN=SORL1 PE=1 SV=2	1886.79	0.64096	1.55937	0.180028	3.56034	0.00037037	0.0244108	2464.22	1894.14	1875.64	1205.35	1271.29	1600.4	3250.36	2072.25	3280.4	2178.9	1852.8	1293.31	1336.54	1519.96	1753.78	2078.15	2137.94	2612.01	1808.43	2704.05	1401.15	3901.49	1990.01	1795.98	2384.21	1168.11	1712.49	1003.1	1245.74	1392.24	1759.32	1116.74	1203.49
Q92882	OSTF1	Osteoclast-stimulating factor 1 OS=Homo sapiens OX=9606 GN=OSTF1 PE=1 SV=2	5593.76	0.631929	1.54964	0.167216	3.77912	0.000157383	0.01536	5091.1	8382.83	8301.43	5364.74	6819.44	4059.77	5117.41	7418.41	7146.99	7675.35	6057.48	5955.41	7136.83	7513.94	4145.65	7996.4	7518.41	6333.65	7753.47	5369.48	4135.2	3608.65	5959.85	4580.08	3557.71	3950.34	6984	3984.9	4624.72	2937.9	3531.92	2583.12	2997.45
P05089	ARG1	Arginase-1 OS=Homo sapiens OX=9606 GN=ARG1 PE=1 SV=2	9676.38	0.617159	1.53385	0.168221	3.66874	0.000243748	0.0183152	8002.63	16137.8	8846.85	7590.24	10423.9	10214.2	11718	11152.2	12397.7	14924.1	11419.6	10018.2	9878.35	16572.7	6820.58	9494.32	13733.1	13776.9	5957.19	6365.1	5696.26	10476.3	13921.9	9707.45	8956.76	5144.41	9530.05	4995.4	5770.41	6497.79	9308.49	7062.62	6809.01
Q15080	NCF4	Neutrophil cytosol factor 4 OS=Homo sapiens OX=9606 GN=NCF4 PE=1 SV=2	11258.3	0.616473	1.53312	0.162968	3.7828	0.000155077	0.01536	12298.8	14070.5	18123.6	8467.14	12529.7	11043.5	23146.1	13020.2	10155.1	12970.2	13641.8	10599.3	9303.96	9586.36	8395.39	15005.9	16248.3	15765.1	11154.5	11421.5	7550.81	8695.9	17539.7	7166.18	9470.05	8013.96	9767.92	7014.28	8514.69	6999.54	9839.32	5927.09	8078.21
P05164	MPO	Myeloperoxidase OS=Homo sapiens OX=9606 GN=MPO PE=1 SV=1	100706	0.602706	1.51856	0.173735	3.46911	0.000522183	0.0283415	87635.5	120244	205777	92918.6	103980	152014	103212	102736	118270	112644	118714	148847	97823.4	138652	80128.3	128416	148743	74215.8	123342	79164.6	49830.1	61872.3	136506	84531.6	74678.5	85553	72102.8	64467.7	103558	50436.7	84140.4	51502.7	66659
Q96RT1-8	ERBIN	Isoform 8 of Erbin OS=Homo sapiens OX=9606 GN=ERBIN	1270.83	-0.585442	0.666445	0.158181	-3.70108	0.000214681	0.0172938	1032.86	977.319	1123.69	2126.25	1154.52	865.557	1277.66	1012.03	1193.25	1019.81	1236.13	1422.46	1565	1112.54	860.841	1266.9	1194.73	1536.2	777.069	962.228	1077.43	963.207	625.693	881.646	1067.6	1739.19	1288.14	2134.09	1276.93	1736.41	1378.26	2034.14	2017.59
Q05682-4	CALD1	Isoform 4 of Caldesmon OS=Homo sapiens OX=9606 GN=CALD1	23225	-0.619992	0.650675	0.170919	-3.62739	0.000286298	0.020087	22097.7	25238.2	16468.6	22084.1	15473.8	31815.8	24078.7	25838.2	15465.3	16916.9	9223.26	20487.4	22673	15498.3	22671.7	21073.2	14675.3	13495.1	20333.5	19128.7	35519.2	20104.8	13950.4	26136.5	23310.7	38295.2	25934.2	42849.9	25479.5	41082.9	17074.7	34830.9	27118.3
P63104	YWHAZ	14-3-3 protein zeta/delta OS=Homo sapiens OX=9606 GN=YWHAZ PE=1 SV=1	54277.7	-0.624397	0.648691	0.155079	-4.02632	5.66572e-05	0.00770184	41436.4	73272.9	41321.3	50567.5	40881.4	53999.6	31222.1	67803.9	45415.5	42151.1	33078.2	33212.3	37169.6	36761.5	56363.2	71178.7	48385.5	47879.6	59821.2	53397.4	59767.8	37430.8	46798.8	41698.9	48450.3	116187	57572.4	73900.4	92305	86187	41046.4	70159.7	54340.6
Q15404	RSU1	Ras suppressor protein 1 OS=Homo sapiens OX=9606 GN=RSU1 PE=1 SV=3	27078.2	-0.648919	0.637758	0.19586	-3.31318	0.000922429	0.0404841	22000.1	29248.7	16818.8	29320.4	21659.2	30951.4	19794	31763.7	18749.9	20197.5	10617.7	21924.4	24066.9	16545.9	18840.3	21809.9	16735.6	10951.6	23542.1	42181.5	34034.2	29508	19314.1	32634.9	31812.3	57143.1	22275.4	49960.3	34124.4	51421.5	18835	36005.1	28793.6
P09486	SPARC	SPARC OS=Homo sapiens OX=9606 GN=SPARC PE=1 SV=1	12049.3	-0.649937	0.637308	0.171822	-3.78263	0.000155183	0.01536	9036.51	13964.1	6284.98	13804.3	9850.2	13553.4	10249.4	11975.7	9771.3	9086.72	6026.93	13177.8	7223.77	7810.68	15270.4	17196.9	9878.52	8472.12	10803	10488.5	10102.5	10408.8	8401.58	8025.41	13849.2	22603.6	11678	21279.6	15473.8	19165.8	8003.21	22397.5	12314.5
P55209	NAP1L1	Nucleosome assembly protein 1-like 1 OS=Homo sapiens OX=9606 GN=NAP1L1 PE=1 SV=1	6508.98	-0.661151	0.632374	0.200743	-3.29351	0.000989446	0.0406046	10528.9	6176.83	3145.78	7018.26	3808.82	6762.99	3800.98	6561.43	5874.46	4025.66	4588.02	3676.2	4448.03	3828.06	6274.9	9086.57	4724.42	5911.78	6452.61	8384.53	8581.44	4108.72	4007.49	6237.83	4609.09	17219.6	5836.97	9955.92	9848.64	10977.2	5206.87	6528.25	6599.1
P07996	THBS1	Thrombospondin-1 OS=Homo sapiens OX=9606 GN=THBS1 PE=1 SV=2	117684	-0.682007	0.623297	0.198637	-3.43343	0.000596001	0.0308643	85250.6	117369	59261.9	163897	138779	122066	82613.3	121924	62915.8	68783	44593.1	60464.5	83035.5	97195.6	105194	108602	62532.5	78545.4	96478.2	145382	153404	115381	119421	116214	156821	216237	113388	183952	159319	170218	68920.7	259832	145580
A6NIZ1	RP1BL	Ras-related protein Rap-1b-like protein OS=Homo sapiens OX=9606 PE=2 SV=1	21270.8	-0.721177	0.606603	0.172916	-4.17067	3.03708e-05	0.00600514	13266.6	25740.9	12662	22492.4	15268.5	30241.8	17620.6	22152.6	11717.6	18590.3	13413.1	17387.8	15914.5	14064.2	16390	30441.9	16467.3	12323.4	20777.2	16638.6	20418.6	17515.2	18071.8	19434.5	20511.4	48218.3	19628.6	38148.3	37735.7	30317.2	13317.2	30921.3	24125.8
P67936-2	TPM4	Isoform 2 of Tropomyosin alpha-4 chain OS=Homo sapiens OX=9606 GN=TPM4	82999.1	-0.737999	0.59957	0.18704	-3.94568	7.95731e-05	0.00961509	56632.4	80355	57787.1	94428.8	63586.4	66373.3	46355.3	99253.3	69299.3	79815.8	39058.8	42779.3	76332.4	58024.8	70663.9	67649.4	48703	43921.2	83347	68371.4	123752	92890.5	53859.4	114368	88231	168389	74314.2	166613	108708	180729	66138.6	104362	83876.7
P02679-2	FGG	Isoform Gamma-A of Fibrinogen gamma chain OS=Homo sapiens OX=9606 GN=FGG	55095.4	-0.744014	0.597076	0.214392	-3.47034	0.000519796	0.0283415	39654.3	56848.3	30611.9	95417.3	49127.2	44568.5	39559.8	58386.6	39568.2	35679.7	17322.4	26653.8	53415.2	34411.5	32703.2	51906.8	35190	32648.2	43696.2	84392.2	76951.2	46782.7	37113.2	59025.5	62098.2	147025	62930.6	88464.9	80256.4	87139.7	33537.1	79897.2	55165.5
G8JLH6	CD9	Tetraspanin OS=Homo sapiens OX=9606 GN=CD9 PE=1 SV=2	12371.5	-0.748559	0.595198	0.226307	-3.30772	0.000940599	0.0404841	11500.7	9803.44	10374.2	14741.5	12245.8	16099.6	9138.44	14766.6	4889.82	8760.42	4152.83	4594.8	10756.1	8855.48	14187.8	10958.2	5805.96	4559.74	8650.09	5658.57	19309	12984.8	8097.38	16866.2	17753.2	21310.4	17235.7	21264.8	18446.2	17683.4	9093.31	21741	15974
P24844	MYL9	Myosin regulatory light polypeptide 9 OS=Homo sapiens OX=9606 GN=MYL9 PE=1 SV=4	4364.54	-0.765918	0.588079	0.228452	-3.35265	0.000800431	0.0395667	2195.84	5975.52	3226.51	1945.14	1884.28	5540.44	5057.31	5709.69	2718.19	3936.05	2979.67	3482.48	2081.11	1790.94	3209.92	6397.33	3399.74	4067.41	4392.92	3000.44	5637.76	3980.78	2817.14	3266.95	4580.47	13740.1	4021.67	6600.99	6633.17	8050.71	3356.55	4603.7	3748.78
O43665-3	RGS10	Isoform 3 of Regulator of G-protein signaling 10 OS=Homo sapiens OX=9606 GN=RGS10	2851.48	-0.878552	0.543913	0.23417	-3.75178	0.000175587	0.0159125	2253.79	3016.44	1817.43	2036.21	1411.2	1825.58	2962.46	3831.26	4601.94	2685.4	1291.68	2693.94	2212.45	2018.98	2043.65	2133.51	1486.08	1243.99	3390.94	2611.16	3278.13	2085	1898.44	1917.39	2495.83	10646.3	2453.32	4770.26	6721.39	2483.84	2097.73	2915.01	2767.94
D3DX19	CLDN5	Claudin OS=Homo sapiens OX=9606 GN=CLDN5 PE=1 SV=1	1286.02	-0.916707	0.529717	0.261248	-3.50895	0.000449873	0.0279564	958.648	1013.83	658.069	1377.25	1016.63	1736.61	1139.03	1013.08	1100.42	1237.02	378.708	683.035	1019.28	919.802	1269.38	850.635	815.35	137.177	715.268	1718.86	2206.55	1291.18	733.536	1421.47	1045.66	2376.34	1407.08	1737.71	1120.95	3341.16	1370.68	2598.78	2029.36
O15173-2	PGRMC2	Isoform 2 of Membrane-associated progesterone receptor component 2 OS=Homo sapiens OX=9606 GN=PGRMC2	1991.63	-0.940621	0.521009	0.284805	-3.30269	0.000957628	0.0404841	1606.22	1819.04	1099.28	1265.72	1406.16	1507.04	2695.87	1949.68	1299.64	1709.42	2415.77	1744.42	1208.9	1512.33	869.595	1035.88	1675.76	2462.62	1061.76	678.36	1133.01	2346.3	1270.72	2703.78	2238.24	2750.37	1515.94	11830	2661.44	1769.58	1047.44	1801.4	1632.12
Q8WWP7	GIMAP1	GTPase IMAP family member 1 OS=Homo sapiens OX=9606 GN=GIMAP1 PE=1 SV=1	716.15	-0.966819	0.511633	0.236433	-4.08918	4.32894e-05	0.00767852	610.973	420.341	363.299	594.491	256.673	376.759	804.594	515.444	595.582	636.041	733.342	321.963	663.181	757.596	801.506	743.108	587.932	1075.81	920.933	487.376	762.492	368.524	399.833	387.588	353.958	988.766	717.652	1053.83	1261.87	2125.16	1617.14	768.152	561.042
P13501	CCL5	C-C motif chemokine 5 OS=Homo sapiens OX=9606 GN=CCL5 PE=1 SV=3	6031.69	-0.974474	0.508925	0.263172	-3.70281	0.000213228	0.0172938	3248.02	3110.32	1411.89	3969.07	8726.88	3362.27	2339.14	7503.27	3031.11	2797.41	2071.32	5477.93	4738.46	3872.9	5630.97	3916.75	2614.78	6877.66	3709.06	6230.48	7230.99	8658.05	4780.7	7157.77	9738.14	9270.57	7781.28	12100.6	6656.84	7489.88	3833.35	19259.1	10448.9
P14222	PRF1	Perforin-1 OS=Homo sapiens OX=9606 GN=PRF1 PE=1 SV=1	2646.54	-1.05194	0.48232	0.221533	-4.74844	2.04994e-06	0.000743104	2163.31	772.885	1417.52	3579.22	2103.71	2304.49	1758.47	1445.76	1261.05	1870.14	1248.16	2503.86	2247.6	3384.37	1781.99	2777.61	1548.96	1549.35	1703.07	2226.06	1966.68	3302.3	1335.83	2172.36	4077.67	1745.09	3590.27	5053.54	5685.42	3458.3	4595.47	7010.43	3694.83
P61313	RPL15	60S ribosomal protein L15 OS=Homo sapiens OX=9606 GN=RPL15 PE=1 SV=2	1487.23	-1.10917	0.463561	0.274465	-4.0412	5.3179e-05	0.00770184	1256.51	901.178	506.929	615.978	1121.31	878.738	781.328	599.256	951.263	1670.46	775.935	1428.83	856.493	976.097	2178.85	736.72	1161.19	662.398	1463.97	628.266	1284.14	1879.56	1855.71	2062.16	1802.23	1140.97	6594.94	1024.24	1595.36	1665.91	3227.64	2309.68	2484.47
C9JV77	AHSG	Alpha-2-HS-glycoprotein OS=Homo sapiens OX=9606 GN=AHSG PE=1 SV=1	2384.37	-1.19843	0.435749	0.228065	-5.25477	1.48207e-07	8.05873e-05	1431.36	1101.44	1198.79	1790.63	2340.25	1556.47	611.685	1645.86	1064.96	1280.85	3174.11	3067.75	3222.49	1817.66	1650.67	1608.65	993.511	1876.32	1304.91	1197.04	2579.99	2163.39	2162.96	2169.56	2355.59	4546.2	131678	2363.46	4314.9	3497.69	3530.02	6264.2	6655.99

## Sheet: IL6-treated HL60 vs Control
Supplementary Table Quantitative proteomic analysis of IL6-treated HL60 cells ( IL6 vs control, significant changed proteins )
Accession	Name	Description	baseMean	log2FoldChange	Fold Change	lfcSE	stat	pvalue	padj	Control-1	Control-2	Control-3	IL6-1	IL6-2	IL6-3
A0A3B3IRL2	CREG1	Cellular repressor of E1A-stimulated genes 1, isoform CRA_a OS=Homo sapiens OX=9606 GN=CREG1 PE=1 SV=1	505.12	4.67235	25.4986	1.51558	3.08287	0.00205015	0.0163872	41.1799	35.6231	37.5666	28.4861	35.3762	2852.49
O43826-2	SLC37A4	Isoform 2 of Glucose-6-phosphate exchanger SLC37A4 OS=Homo sapiens OX=9606 GN=SLC37A4	388.222	2.88363	7.38006	0.827049	3.48665	0.000489105	0.00458616	97.3344	84.7252	95.8937	90.5452	917.701	1043.13
P16989	YBX3	Y-box-binding protein 3 OS=Homo sapiens OX=9606 GN=YBX3 PE=1 SV=4	435.661	2.47181	5.54738	0.10103	24.4661	3.39535e-132	1.48899e-129	135.707	128.051	135.437	720.292	733.537	760.945
Q13153	PAK1	Serine/threonine-protein kinase PAK 1 OS=Homo sapiens OX=9606 GN=PAK1 PE=1 SV=2	1707.22	2.39274	5.25153	0.315518	7.58352	3.36306e-14	8.67549e-13	548.442	567.081	522.967	1660.33	3499.13	3445.39
Q9H967	WDR76	WD repeat-containing protein 76 OS=Homo sapiens OX=9606 GN=WDR76 PE=1 SV=2	639.398	2.31017	4.9594	0.0829431	27.8524	1.00659e-170	6.3762e-168	204.028	216.627	223.422	1069.25	1085.22	1037.85
Q5JSH3	WDR44	WD repeat-containing protein 44 OS=Homo sapiens OX=9606 GN=WDR44 PE=1 SV=1	917.645	2.23922	4.72141	0.688838	3.25072	0.00115113	0.00994335	333.183	317.72	311.407	304.191	2129.86	2109.51
P62263	RPS14	40S ribosomal protein S14 OS=Homo sapiens OX=9606 GN=RPS14 PE=1 SV=3	727.069	2.21482	4.64223	0.692018	3.20052	0.0013718	0.011569	280.772	256.101	236.274	245.184	1667.89	1676.19
Q5TEU4	NDUFAF5	Arginine-hydroxylase NDUFAF5, mitochondrial OS=Homo sapiens OX=9606 GN=NDUFAF5 PE=1 SV=1	225.801	2.1376	4.40029	0.157524	13.5699	6.0364e-42	4.77965e-40	94.5266	75.0974	81.0648	356.077	349.6	398.44
Q6PCB5	RSBN1L	Round spermatid basic protein 1-like protein OS=Homo sapiens OX=9606 GN=RSBN1L PE=1 SV=2	799.337	2.07205	4.20484	0.0733822	28.2364	2.09147e-175	1.49044e-172	311.657	309.055	300.533	1277.81	1258.98	1338
P51398	DAP3	28S ribosomal protein S29, mitochondrial OS=Homo sapiens OX=9606 GN=DAP3 PE=1 SV=1	1107.96	2.03218	4.09021	0.208298	9.75608	1.7374e-22	6.7842e-21	498.839	395.705	411.255	1377.51	1870.78	2093.66
Q9BXW7	HDHD5	Haloacid dehalogenase-like hydrolase domain-containing 5 OS=Homo sapiens OX=9606 GN=HDHD5 PE=1 SV=1	806.652	2.03127	4.08764	0.294432	6.89893	5.23973e-12	1.21925e-10	238.656	254.176	458.708	1317.48	1304.76	1266.13
Q12800	TFCP2	Alpha-globin transcription factor CP2 OS=Homo sapiens OX=9606 GN=TFCP2 PE=1 SV=2	717.326	1.97945	3.94341	0.0717041	27.6057	9.49504e-168	5.41312e-165	292.003	284.022	294.601	1124.18	1147.65	1161.5
O43156	TTI1	TELO2-interacting protein 1 homolog OS=Homo sapiens OX=9606 GN=TTI1 PE=1 SV=3	603.844	1.96915	3.91538	0.0799407	24.6327	5.64276e-134	2.68078e-131	242.4	234.92	260	954.285	970.766	960.694
Q5SW79	CEP170	Centrosomal protein of 170 kDa OS=Homo sapiens OX=9606 GN=CEP170 PE=1 SV=1	310.855	1.91924	3.78224	0.702586	2.73168	0.00630125	0.0409151	49.6031	170.413	170.038	178.038	654.46	642.576
Q6ZPD9	DPY19L3	Probable C-mannosyltransferase DPY19L3 OS=Homo sapiens OX=9606 GN=DPY19L3 PE=2 SV=1	246.15	1.90903	3.75556	0.129679	14.7212	4.71558e-49	4.78597e-47	113.245	92.4275	104.791	393.719	393.301	379.416
Q5GLZ8	HERC4	Probable E3 ubiquitin-protein ligase HERC4 OS=Homo sapiens OX=9606 GN=HERC4 PE=1 SV=1	482.102	1.85551	3.61879	0.123278	15.0514	3.38065e-51	3.85461e-49	189.989	194.483	242.206	753.865	757.468	754.604
O00459	PIK3R2	Phosphatidylinositol 3-kinase regulatory subunit beta OS=Homo sapiens OX=9606 GN=PIK3R2 PE=1 SV=2	550.173	1.79278	3.46483	0.605489	2.96088	0.00306757	0.0231632	252.695	249.362	237.263	239.08	1163.25	1159.38
Q8WVJ2	NUDCD2	NudC domain-containing protein 2 OS=Homo sapiens OX=9606 GN=NUDCD2 PE=1 SV=1	1382.61	1.78262	3.4405	0.513988	3.46821	0.000523931	0.00487265	363.132	348.529	1156.66	2150.7	2178.76	2097.88
Q8IZP0	ABI1	Abl interactor 1 OS=Homo sapiens OX=9606 GN=ABI1 PE=1 SV=4	1581.62	1.76168	3.39092	0.0485669	36.2732	4.27587e-288	8.12559e-285	726.264	725.941	708.823	2437.6	2487.78	2403.32
Q49B96	COX19	Cytochrome c oxidase assembly protein COX19 OS=Homo sapiens OX=9606 GN=COX19 PE=1 SV=1	239.011	1.74858	3.36028	0.134257	13.0241	8.92556e-39	6.36058e-37	116.988	99.1671	112.7	366.25	389.139	349.824
P55209	NAP1L1	Nucleosome assembly protein 1-like 1 OS=Homo sapiens OX=9606 GN=NAP1L1 PE=1 SV=1	2401.48	1.6033	3.03838	0.136319	11.7614	6.17054e-32	3.38253e-30	1152.1	1072.54	1343.5	3391.88	3352.42	4096.42
A7E2V4-2	ZSWIM8	Isoform 2 of Zinc finger SWIM domain-containing protein 8 OS=Homo sapiens OX=9606 GN=ZSWIM8	177.904	1.5958	3.02262	0.136225	11.7144	1.07536e-31	5.83867e-30	93.5907	86.6508	85.0192	271.636	269.484	261.047
Q8TBC4	UBA3	NEDD8-activating enzyme E1 catalytic subunit OS=Homo sapiens OX=9606 GN=UBA3 PE=1 SV=2	1243.26	1.54883	2.9258	0.557051	2.78041	0.00542897	0.0364823	639.225	647.956	612.929	565.653	2476.34	2517.46
Q8N4C6-7	NIN	Isoform 7 of Ninein OS=Homo sapiens OX=9606 GN=NIN	304.248	1.53044	2.88875	0.488701	3.13166	0.0017382	0.0142788	62.7058	202.185	204.639	434.413	472.377	449.169
P41223	BUD31	Protein BUD31 homolog OS=Homo sapiens OX=9606 GN=BUD31 PE=1 SV=2	806.077	1.51728	2.86251	0.113452	13.3738	8.60771e-41	6.45692e-39	425.838	418.812	407.301	1050.93	1257.94	1275.64
Q8NFH3	NUP43	Nucleoporin Nup43 OS=Homo sapiens OX=9606 GN=NUP43 PE=1 SV=1	244.602	1.49848	2.82545	0.165627	9.04732	1.46519e-19	4.82834e-18	138.514	117.46	127.529	311.313	388.098	384.7
Q15084-2	PDIA6	Isoform 2 of Protein disulfide-isomerase A6 OS=Homo sapiens OX=9606 GN=PDIA6	2473.79	1.47207	2.77419	0.0661051	22.2686	7.45011e-110	2.83154e-107	1328.05	1303.61	1300.99	3627.91	3869.54	3412.63
Q3B726	TWISTNB	DNA-directed RNA polymerase I subunit RPA43 OS=Homo sapiens OX=9606 GN=TWISTNB PE=1 SV=1	1348.07	1.44052	2.71418	0.256197	5.62269	1.88002e-08	3.42428e-07	727.2	730.755	719.697	1300.19	2314.02	2296.58
Q8NF37	LPCAT1	Lysophosphatidylcholine acyltransferase 1 OS=Homo sapiens OX=9606 GN=LPCAT1 PE=1 SV=2	520.842	1.42667	2.68826	0.0790195	18.0547	7.24776e-73	1.53035e-70	289.195	276.32	281.75	773.195	762.67	741.922
O75460	ERN1	Serine/threonine-protein kinase/endoribonuclease IRE1 OS=Homo sapiens OX=9606 GN=ERN1 PE=1 SV=2	257.171	1.41816	2.67244	0.111302	12.7415	3.47596e-37	2.30424e-35	146.002	141.53	132.472	375.406	376.653	370.961
Q9Y6A4	CFAP20	Cilia- and flagella-associated protein 20 OS=Homo sapiens OX=9606 GN=CFAP20 PE=1 SV=1	705.563	1.41064	2.65855	0.0673569	20.9428	2.18442e-97	6.22669e-95	389.337	383.189	384.563	1041.78	1004.06	1030.45
P32519	ELF1	ETS-related transcription factor Elf-1 OS=Homo sapiens OX=9606 GN=ELF1 PE=1 SV=2	1577.38	1.39972	2.6385	0.0495665	28.2392	1.93227e-175	1.49044e-172	890.984	864.583	845.249	2331.79	2293.21	2238.45
P35908	KRT2	Keratin, type II cytoskeletal 2 epidermal OS=Homo sapiens OX=9606 GN=KRT2 PE=1 SV=2	902.21	1.39181	2.62407	0.298792	4.65812	3.19118e-06	4.57108e-05	319.144	542.049	632.701	1493.49	1117.47	1308.4
Q13422	IKZF1	DNA-binding protein Ikaros OS=Homo sapiens OX=9606 GN=IKZF1 PE=1 SV=1	3093.42	1.3859	2.61336	0.0332051	41.7377	0	0	1722.07	1700.28	1714.22	4457.06	4536.48	4430.39
Q9Y5J1	UTP18	U3 small nucleolar RNA-associated protein 18 homolog OS=Homo sapiens OX=9606 GN=UTP18 PE=1 SV=3	1058.35	1.33392	2.52087	0.466972	2.85654	0.00428289	0.0303691	609.276	589.226	605.02	611.434	1852.05	2083.09
P28702-3	RXRB	Isoform 2 of Retinoic acid receptor RXR-beta OS=Homo sapiens OX=9606 GN=RXRB	332.948	1.33153	2.51669	0.105043	12.676	8.03454e-37	5.2051e-35	199.348	193.52	174.981	487.316	482.782	459.738
P80217-2	IFI35	Isoform 2 of Interferon-induced 35 kDa protein OS=Homo sapiens OX=9606 GN=IFI35	2472.25	1.32118	2.49871	0.1417	9.3238	1.12244e-20	3.95001e-19	1150.23	1606.89	1482.89	3563.82	3529.3	3500.35
P62328	TMSB4X	Thymosin beta-4 OS=Homo sapiens OX=9606 GN=TMSB4X PE=1 SV=2	4209.67	1.31855	2.49416	0.438346	3.00802	0.00262959	0.020341	2533.5	2387.71	2307.38	2545.44	6453.04	9030.94
Q86X55	CARM1	Histone-arginine methyltransferase CARM1 OS=Homo sapiens OX=9606 GN=CARM1 PE=1 SV=3	654.342	1.29223	2.44906	0.467284	2.7654	0.00568531	0.0376436	373.427	381.264	383.575	383.545	1216.32	1187.92
Q9NX00	TMEM160	Transmembrane protein 160 OS=Homo sapiens OX=9606 GN=TMEM160 PE=1 SV=1	603.747	1.29041	2.44597	0.0776825	16.6113	5.77323e-62	9.40376e-60	355.645	345.641	349.963	893.243	825.099	852.893
O75494	SRSF10	Serine/arginine-rich splicing factor 10 OS=Homo sapiens OX=9606 GN=SRSF10 PE=1 SV=1	1785.9	1.28401	2.43514	0.169579	7.57174	3.68269e-14	9.4148e-13	866.65	1149.57	1103.27	2312.46	2336.91	2946.55
Q03113	GNA12	Guanine nucleotide-binding protein subunit alpha-12 OS=Homo sapiens OX=9606 GN=GNA12 PE=1 SV=4	289.235	1.28164	2.43116	0.103691	12.3602	4.29059e-35	2.65877e-33	175.951	164.637	165.095	418.136	407.867	403.724
Q9UHI6	DDX20	Probable ATP-dependent RNA helicase DDX20 OS=Homo sapiens OX=9606 GN=DDX20 PE=1 SV=2	1236.51	1.27475	2.41957	0.0837629	15.2186	2.66249e-52	3.09772e-50	792.714	690.318	686.085	1763.09	1796.9	1689.93
E7EQY1	FAM136A	Protein FAM136A OS=Homo sapiens OX=9606 GN=FAM136A PE=1 SV=1	733.656	1.27394	2.41822	0.0677521	18.803	7.1356e-79	1.6272e-76	427.71	443.845	416.198	1061.11	1033.19	1019.88
Q5VV42	CDKAL1	Threonylcarbamoyladenosine tRNA methylthiotransferase OS=Homo sapiens OX=9606 GN=CDKAL1 PE=1 SV=1	260.335	1.26611	2.40512	0.109089	11.6062	3.83201e-31	2.04171e-29	158.168	150.195	150.266	363.198	378.734	361.449
P07203	GPX1	Glutathione peroxidase 1 OS=Homo sapiens OX=9606 GN=GPX1 PE=1 SV=4	2121.8	1.26431	2.40212	0.323684	3.906	9.38366e-05	0.00104281	915.317	940.643	1886.24	2821.14	2912.3	3255.16
P10412	HIST1H1E	Histone H1.4 OS=Homo sapiens OX=9606 GN=HIST1H1E PE=1 SV=2	3130.29	1.26289	2.39976	0.161778	7.80631	5.88843e-15	1.60622e-13	2040.28	1954.46	1529.36	4029.77	4136.94	5090.94
Q5JWF2-2	GNAS	Isoform XLas-2 of Guanine nucleotide-binding protein G(s) subunit alpha isoforms XLas OS=Homo sapiens OX=9606 GN=GNAS	2431.94	1.25191	2.38157	0.263266	4.75531	1.98143e-06	2.91137e-05	1270.03	1282.43	1762.66	2379.61	4026.65	3870.25
Q8NE01	CNNM3	Metal transporter CNNM3 OS=Homo sapiens OX=9606 GN=CNNM3 PE=1 SV=1	630.286	1.25139	2.38071	0.344299	3.6346	0.00027841	0.00276519	293.875	281.134	543.727	687.736	1009.26	965.978
Q9NPG3	UBN1	Ubinuclein-1 OS=Homo sapiens OX=9606 GN=UBN1 PE=1 SV=2	115.07	1.24497	2.37014	0.171858	7.2442	4.35001e-13	1.04639e-11	70.193	64.5067	70.1902	163.795	172.719	149.018
O96017-9	CHEK2	Isoform 9 of Serine/threonine-protein kinase Chk2 OS=Homo sapiens OX=9606 GN=CHEK2	1005.09	1.22057	2.33039	0.0623303	19.5824	2.18617e-85	5.41885e-83	578.391	636.402	596.123	1393.79	1423.37	1402.46
Q9BU23	LMF2	Lipase maturation factor 2 OS=Homo sapiens OX=9606 GN=LMF2 PE=1 SV=2	1061.63	1.22026	2.32989	0.0577867	21.1167	5.58963e-99	1.67718e-96	652.327	623.886	636.655	1510.78	1503.49	1442.63
P04264	KRT1	Keratin, type II cytoskeletal 1 OS=Homo sapiens OX=9606 GN=KRT1 PE=1 SV=6	3256.19	1.21417	2.32007	0.25182	4.82157	1.4243e-06	2.12564e-05	1813.79	1551.05	2519.93	5717.57	3967.34	3967.49
Q92793	CREBBP	CREB-binding protein OS=Homo sapiens OX=9606 GN=CREBBP PE=1 SV=3	673.392	1.19489	2.28927	0.123277	9.69269	3.23888e-22	1.23099e-20	349.093	453.473	426.084	940.042	942.673	928.988
Q99614	TTC1	Tetratricopeptide repeat protein 1 OS=Homo sapiens OX=9606 GN=TTC1 PE=1 SV=1	2004.21	1.19444	2.28856	0.0759514	15.7264	9.97456e-56	1.32244e-53	1241.95	1206.37	1208.06	2554.59	2922.7	2891.59
P30414	NKTR	NK-tumor recognition protein OS=Homo sapiens OX=9606 GN=NKTR PE=1 SV=2	790.497	1.19398	2.28783	0.257903	4.62956	3.66445e-06	5.14574e-05	318.208	569.97	554.602	1117.06	1095.62	1087.52
D6RFG8	DCK	Deoxycytidine kinase OS=Homo sapiens OX=9606 GN=DCK PE=1 SV=1	3693.14	1.18951	2.28076	0.036096	32.9542	3.68342e-238	5.24979e-235	2240.56	2290.47	2223.35	5240.43	5158.69	5005.33
Q99653	CHP1	Calcineurin B homologous protein 1 OS=Homo sapiens OX=9606 GN=CHP1 PE=1 SV=3	619.218	1.17739	2.26168	0.393115	2.99503	0.00274415	0.0209992	190.925	471.766	476.503	760.986	908.337	906.793
Q9Y265	RUVBL1	RuvB-like 1 OS=Homo sapiens OX=9606 GN=RUVBL1 PE=1 SV=1	5069.99	1.16906	2.24865	0.327747	3.56695	0.000361156	0.00351357	2248.05	2319.35	4796.66	6351.39	7092.94	7611.57
Q8IV50	LYSMD2	LysM and putative peptidoglycan-binding domain-containing protein 2 OS=Homo sapiens OX=9606 GN=LYSMD2 PE=1 SV=1	723.7	1.15526	2.22724	0.212794	5.42901	5.66679e-08	9.61499e-07	459.53	439.994	445.856	733.518	1106.03	1157.27
Q9UKK3	PARP4	Protein mono-ADP-ribosyltransferase PARP4 OS=Homo sapiens OX=9606 GN=PARP4 PE=1 SV=3	692.983	1.12103	2.17502	0.0788628	14.2149	7.40251e-46	6.69869e-44	467.018	407.259	434.982	938.007	950.997	959.637
P15428	HPGD	15-hydroxyprostaglandin dehydrogenase [NAD(+)] OS=Homo sapiens OX=9606 GN=HPGD PE=1 SV=1	412.881	1.11067	2.15946	0.0856547	12.9668	1.88634e-38	1.28024e-36	255.503	269.58	259.012	561.584	555.615	575.993
Q9NVE7	PANK4	Pantothenate kinase 4 OS=Homo sapiens OX=9606 GN=PANK4 PE=1 SV=1	1441.44	1.09433	2.13514	0.255451	4.2839	1.83642e-05	0.000235268	902.215	931.015	925.325	1309.34	2127.78	2452.99
Q92520	FAM3C	Protein FAM3C OS=Homo sapiens OX=9606 GN=FAM3C PE=1 SV=1	1600.99	1.09242	2.13231	0.40837	2.67506	0.00747154	0.0464	1051.96	997.447	1017.26	1047.88	2288.01	3203.37
Q8NHP6	MOSPD2	Motile sperm domain-containing protein 2 OS=Homo sapiens OX=9606 GN=MOSPD2 PE=1 SV=1	1609.46	1.09193	2.13159	0.283249	3.85502	0.00011572	0.0012471	900.343	1087.95	1095.36	1403.96	2413.91	2755.26
Q8WWM7	ATXN2L	Ataxin-2-like protein OS=Homo sapiens OX=9606 GN=ATXN2L PE=1 SV=2	3184.07	1.08189	2.1168	0.112585	9.60947	7.29242e-22	2.71726e-20	2056.19	2061.33	2011.79	3985.01	3999.6	4990.53
Q13547	HDAC1	Histone deacetylase 1 OS=Homo sapiens OX=9606 GN=HDAC1 PE=1 SV=1	6116.9	1.07921	2.11289	0.252713	4.27051	1.95023e-05	0.000248205	2620.54	4033.11	5136.74	8077.85	7889.94	8943.22
P49354	FNTA	Protein farnesyltransferase/geranylgeranyltransferase type-1 subunit alpha OS=Homo sapiens OX=9606 GN=FNTA PE=1 SV=1	1178.08	1.07552	2.10749	0.0875273	12.2879	1.05265e-34	6.38419e-33	820.791	724.016	729.583	1636.93	1658.52	1498.64
Q13442	PDAP1	28 kDa heat- and acid-stable phosphoprotein OS=Homo sapiens OX=9606 GN=PDAP1 PE=1 SV=1	1245.61	1.0746	2.10614	0.249983	4.2987	1.71804e-05	0.000222603	824.534	822.22	759.241	1138.43	2024.77	1904.48
Q969U7	PSMG2	Proteasome assembly chaperone 2 OS=Homo sapiens OX=9606 GN=PSMG2 PE=1 SV=1	1347.45	1.07155	2.10169	0.398596	2.68831	0.0071815	0.04509	548.442	887.69	1170.5	1138.43	1935.29	2404.38
Q01105	SET	Protein SET OS=Homo sapiens OX=9606 GN=SET PE=1 SV=3	1532.42	1.06959	2.09884	0.0503252	21.2537	3.0492e-100	9.6575e-98	1029.5	982.043	954.983	2100.85	2074.71	2052.44
Q9UBQ5	EIF3K	Eukaryotic translation initiation factor 3 subunit K OS=Homo sapiens OX=9606 GN=EIF3K PE=1 SV=1	408.945	1.06413	2.09091	0.397189	2.67916	0.0073808	0.0459868	261.118	264.766	267.909	279.774	681.513	698.59
P32780	GTF2H1	General transcription factor IIH subunit 1 OS=Homo sapiens OX=9606 GN=GTF2H1 PE=1 SV=1	2413.15	1.05713	2.08079	0.0640743	16.4986	3.75775e-61	5.94537e-59	1659.36	1522.17	1517.49	3114.14	3282.71	3383.04
P35236-3	PTPN7	Isoform 3 of Tyrosine-protein phosphatase non-receptor type 7 OS=Homo sapiens OX=9606 GN=PTPN7	661.966	1.0501	2.07068	0.368374	2.85064	0.00436313	0.0308973	225.554	540.123	527.91	882.052	905.216	890.94
Q5T3J3	LRIF1	Ligand-dependent nuclear receptor-interacting factor 1 OS=Homo sapiens OX=9606 GN=LRIF1 PE=1 SV=1	295.2	1.05007	2.07063	0.103215	10.1736	2.60114e-24	1.08242e-22	202.156	191.595	182.89	398.806	406.827	388.928
Q8NFQ8	TOR1AIP2	Torsin-1A-interacting protein 2 OS=Homo sapiens OX=9606 GN=TOR1AIP2 PE=1 SV=1	1564.7	1.04418	2.06219	0.0732821	14.2487	4.56535e-46	4.19792e-44	1029.5	1009	1027.15	1947.23	2220.38	2154.96
O60343	TBC1D4	TBC1 domain family member 4 OS=Homo sapiens OX=9606 GN=TBC1D4 PE=1 SV=2	1587.78	1.03409	2.04782	0.129082	8.01109	1.13693e-15	3.20874e-14	1026.69	1026.33	1072.63	1797.68	2237.03	2366.33
O94967-4	WDR47	Isoform 4 of WD repeat-containing protein 47 OS=Homo sapiens OX=9606 GN=WDR47	361.276	1.02003	2.02797	0.370559	2.75269	0.00591083	0.0387329	239.592	231.069	245.172	262.479	580.587	608.756
O60711-2	LPXN	Isoform 2 of Leupaxin OS=Homo sapiens OX=9606 GN=LPXN	2043.65	1.01982	2.02767	0.352497	2.89314	0.00381415	0.0276296	967.728	960.861	2121.52	2763.15	2788.48	2660.14
Q68CP9	ARID2	AT-rich interactive domain-containing protein 2 OS=Homo sapiens OX=9606 GN=ARID2 PE=1 SV=2	818.876	1.01347	2.01876	0.067493	15.0159	5.77834e-51	6.3568e-49	572.775	534.347	520.001	1091.63	1112.27	1082.23
Q9NRF8	CTPS2	CTP synthase 2 OS=Homo sapiens OX=9606 GN=CTPS2 PE=1 SV=1	3747.82	1.00528	2.00733	0.281131	3.57582	0.000349131	0.00340821	1512.43	2989.45	2975.67	4970.83	4873.6	5164.92
Q9NX20	MRPL16	39S ribosomal protein L16, mitochondrial OS=Homo sapiens OX=9606 GN=MRPL16 PE=1 SV=1	1411.71	1.00098	2.00136	0.0680007	14.7202	4.78513e-49	4.78597e-47	986.446	939.68	895.667	1922.81	1935.29	1790.34
Q9BY32	ITPA	Inosine triphosphate pyrophosphatase OS=Homo sapiens OX=9606 GN=ITPA PE=1 SV=2	1157.15	0.999994	1.99999	0.0506468	19.7445	8.95149e-87	2.31966e-84	772.124	782.746	759.241	1526.04	1557.6	1545.14
A0A087WXF8	ZCCHC17	Nucleolar protein of 40 kDa OS=Homo sapiens OX=9606 GN=ZCCHC17 PE=1 SV=1	652.684	0.991572	1.98835	0.073757	13.4438	3.34903e-41	2.58011e-39	423.966	440.956	445.856	905.452	844.868	855.007
P62993	GRB2	Growth factor receptor-bound protein 2 OS=Homo sapiens OX=9606 GN=GRB2 PE=1 SV=1	2621.2	0.991126	1.98774	0.344479	2.87717	0.00401258	0.0287183	1796.94	1773.45	1693.46	1846.51	4348.16	4268.69
Q9ULF5	SLC39A10	Zinc transporter ZIP10 OS=Homo sapiens OX=9606 GN=SLC39A10 PE=1 SV=2	358.715	0.991123	1.98773	0.0978171	10.1324	3.96776e-24	1.63914e-22	246.144	239.734	234.297	463.917	463.013	505.183
P14373	TRIM27	Zinc finger protein RFP OS=Homo sapiens OX=9606 GN=TRIM27 PE=1 SV=1	602.373	0.978529	1.97046	0.0715068	13.6844	1.25795e-42	1.02451e-40	406.184	411.11	399.392	813.889	775.156	808.505
Q7L591	DOK3	Docking protein 3 OS=Homo sapiens OX=9606 GN=DOK3 PE=1 SV=2	2458.65	0.971993	1.96155	0.195972	4.95985	7.0548e-07	1.07827e-05	1692.12	1665.62	1623.27	2391.82	3689.53	3689.53
Q6ICG6	KIAA0930	Uncharacterized protein KIAA0930 OS=Homo sapiens OX=9606 GN=KIAA0930 PE=1 SV=1	3261.43	0.970205	1.95912	0.0608641	15.9405	3.31597e-57	4.61082e-55	2190.96	2221.15	2200.61	4016.54	4474.05	4465.27
Q9H3P7	ACBD3	Golgi resident protein GCP60 OS=Homo sapiens OX=9606 GN=ACBD3 PE=1 SV=4	1243.22	0.965796	1.95314	0.0561998	17.185	3.4369e-66	6.53125e-64	852.612	836.662	836.351	1635.92	1589.85	1707.9
P23921	RRM1	Ribonucleoside-diphosphate reductase large subunit OS=Homo sapiens OX=9606 GN=RRM1 PE=1 SV=1	3759.19	0.9491	1.93067	0.199478	4.75792	1.95596e-06	2.88138e-05	1993.48	2850.81	2852.1	4481.48	4502.15	5875.13
Q8IZ07	ANKRD13A	Ankyrin repeat domain-containing protein 13A OS=Homo sapiens OX=9606 GN=ANKRD13A PE=1 SV=3	1677.59	0.94378	1.92356	0.169842	5.55682	2.74738e-08	4.86423e-07	1135.26	1174.6	1132.93	1717.31	2449.28	2456.16
R4GMX8	RANBP10	Ran-binding protein 10 OS=Homo sapiens OX=9606 GN=RANBP10 PE=1 SV=1	455.338	0.938114	1.91602	0.100187	9.36365	7.7027e-21	2.74457e-19	342.542	298.464	295.59	598.209	617.003	580.221
P13473-2	LAMP2	Isoform LAMP-2B of Lysosome-associated membrane glycoprotein 2 OS=Homo sapiens OX=9606 GN=LAMP2	6082.78	0.935567	1.91264	0.226507	4.13041	3.62116e-05	0.000433703	3536.79	3370.72	5623.13	7336.19	7914.91	8714.94
P30566	ADSL	Adenylosuccinate lyase OS=Homo sapiens OX=9606 GN=ADSL PE=1 SV=2	4036.85	0.933063	1.90933	0.23073	4.04395	5.25575e-05	0.000615257	2155.39	2904.73	3265.33	4039.94	5985.87	5869.85
P61981	YWHAG	14-3-3 protein gamma OS=Homo sapiens OX=9606 GN=YWHAG PE=1 SV=2	3633.32	0.930017	1.9053	0.340169	2.73399	0.00625725	0.0406757	2495.13	2504.21	2504.11	2581.05	5161.81	6553.64
Q9BSU1	C16orf70	UPF0183 protein C16orf70 OS=Homo sapiens OX=9606 GN=C16orf70 PE=1 SV=1	477.986	0.921317	1.89384	0.0771759	11.9379	7.51032e-33	4.36901e-31	324.76	328.31	338.099	621.608	630.529	624.609
Q8TF42	UBASH3B	Ubiquitin-associated and SH3 domain-containing protein B OS=Homo sapiens OX=9606 GN=UBASH3B PE=1 SV=2	404.17	0.916101	1.88701	0.0854109	10.7258	7.70046e-27	3.48415e-25	277.029	273.431	289.658	526.993	537.927	519.979
P05556	ITGB1	Integrin beta-1 OS=Homo sapiens OX=9606 GN=ITGB1 PE=1 SV=2	7664.87	0.914198	1.88452	0.322133	2.83796	0.00454033	0.0319561	4590.63	5614.01	5738.79	5603.63	11407.8	13034.4
O43379-4	WDR62	Isoform 4 of WD repeat-containing protein 62 OS=Homo sapiens OX=9606 GN=WDR62	105.897	0.904448	1.87183	0.161498	5.60038	2.13879e-08	3.84645e-07	73.9367	73.1718	74.1446	139.379	136.303	138.45
Q9P2K3-3	RCOR3	Isoform 3 of REST corepressor 3 OS=Homo sapiens OX=9606 GN=RCOR3	745.048	0.899498	1.86542	0.0650012	13.8382	1.49953e-43	1.27594e-41	526.916	515.091	518.024	964.459	999.899	945.897
Q9NSI2	FAM207A	Protein FAM207A OS=Homo sapiens OX=9606 GN=FAM207A PE=1 SV=2	583.795	0.896361	1.86137	0.141988	6.31291	2.73829e-10	5.78186e-09	379.042	362.971	482.434	756.917	768.913	752.491
Q9HBH0	RHOF	Rho-related GTP-binding protein RhoF OS=Homo sapiens OX=9606 GN=RHOF PE=1 SV=1	940.507	0.89306	1.85711	0.179664	4.97072	6.67064e-07	1.02229e-05	666.366	637.365	671.256	947.164	1376.55	1344.34
Q14696	MESD	LRP chaperone MESD OS=Homo sapiens OX=9606 GN=MESD PE=1 SV=2	2754.6	0.890314	1.85358	0.191532	4.64839	3.34539e-06	4.75612e-05	1941.07	1913.06	1937.65	3042.93	3089.18	4603.72
Q5JWT2	MED23	Mediator of RNA polymerase II transcription subunit 23 OS=Homo sapiens OX=9606 GN=MED23 PE=1 SV=1	3274.39	0.886857	1.84914	0.328035	2.70354	0.00686043	0.0436023	1697.74	1661.77	3536.2	4250.54	4311.74	4188.37
P48553	TRAPPC10	Trafficking protein particle complex subunit 10 OS=Homo sapiens OX=9606 GN=TRAPPC10 PE=1 SV=2	679.34	0.885822	1.84782	0.0659002	13.4419	3.43632e-41	2.61206e-39	481.992	472.728	476.503	871.879	903.135	869.803
P61586	RHOA	Transforming protein RhoA OS=Homo sapiens OX=9606 GN=RHOA PE=1 SV=1	2922.51	0.881663	1.8425	0.333022	2.64746	0.00810981	0.0498212	2058.06	2058.44	2052.32	2051	4697.76	4617.46
Q00765	REEP5	Receptor expression-enhancing protein 5 OS=Homo sapiens OX=9606 GN=REEP5 PE=1 SV=3	4554.58	0.879253	1.83942	0.0589093	14.9255	2.24828e-50	2.41838e-48	2990.22	3348.57	3286.09	5787.77	6057.66	5857.17
Q9UIQ6	LNPEP	Leucyl-cystinyl aminopeptidase OS=Homo sapiens OX=9606 GN=LNPEP PE=1 SV=3	2158.05	0.872633	1.831	0.324341	2.69048	0.00713491	0.0448964	1147.42	1142.83	2283.65	2392.83	2970.56	3011.02
P38432	COIL	Coilin OS=Homo sapiens OX=9606 GN=COIL PE=1 SV=1	1309.42	0.868436	1.82568	0.0526422	16.497	3.8586e-61	5.94537e-59	928.42	944.494	907.53	1731.55	1705.34	1639.2
Q96SI9	STRBP	Spermatid perinuclear RNA-binding protein OS=Homo sapiens OX=9606 GN=STRBP PE=1 SV=1	2354.85	0.866922	1.82377	0.0399969	21.6747	3.55371e-104	1.26623e-101	1648.13	1667.55	1688.52	3077.52	3088.14	2959.23
Q9HA64	FN3KRP	Ketosamine-3-kinase OS=Homo sapiens OX=9606 GN=FN3KRP PE=1 SV=2	1144.3	0.861338	1.81672	0.0511487	16.8399	1.24507e-63	2.21817e-61	807.688	829.922	799.773	1458.9	1494.13	1475.39
E7EWW0	VPS35L	VPS35 endosomal protein sorting factor-like OS=Homo sapiens OX=9606 GN=VPS35L PE=1 SV=2	5489.43	0.857654	1.81209	0.0288531	29.7249	3.66359e-194	4.17722e-191	3858.75	3933.95	3919.78	6917.04	7163.69	7143.38
P36915	GNL1	Guanine nucleotide-binding protein-like 1 OS=Homo sapiens OX=9606 GN=GNL1 PE=1 SV=2	2434.4	0.857227	1.81155	0.0424785	20.1803	1.45993e-90	3.96338e-88	1757.63	1728.2	1709.28	3209.78	3166.17	3035.33
Q8WWW0-2	RASSF5	Isoform 2 of Ras association domain-containing protein 5 OS=Homo sapiens OX=9606 GN=RASSF5	1385.03	0.85297	1.80622	0.131781	6.47265	9.62971e-11	2.07951e-09	913.446	888.652	1159.62	1844.48	1781.3	1722.7
Q9Y3P9	RABGAP1	Rab GTPase-activating protein 1 OS=Homo sapiens OX=9606 GN=RABGAP1 PE=1 SV=3	2041.59	0.851845	1.80481	0.292873	2.90858	0.00363074	0.026571	1296.23	1381.6	1689.51	1645.07	3186.98	3050.12
Q9P2I0	CPSF2	Cleavage and polyadenylation specificity factor subunit 2 OS=Homo sapiens OX=9606 GN=CPSF2 PE=1 SV=2	3892.1	0.841849	1.79235	0.158279	5.31875	1.04483e-07	1.74169e-06	2497	2432.96	3433.39	4792.79	5046.32	5150.12
Q15054	POLD3	DNA polymerase delta subunit 3 OS=Homo sapiens OX=9606 GN=POLD3 PE=1 SV=2	1477.74	0.841356	1.79173	0.27466	3.06327	0.00218933	0.0173594	942.459	834.736	1398.86	1672.54	1632.51	2385.35
O75874	IDH1	Isocitrate dehydrogenase [NADP] cytoplasmic OS=Homo sapiens OX=9606 GN=IDH1 PE=1 SV=2	7701.44	0.832891	1.78125	0.101317	8.22063	2.0244e-16	5.82884e-15	4924.74	5875.89	5813.93	9024	10182.1	10388
P21281	ATP6V1B2	V-type proton ATPase subunit B, brain isoform OS=Homo sapiens OX=9606 GN=ATP6V1B2 PE=1 SV=3	3971.58	0.831963	1.78011	0.0564826	14.7296	4.16445e-49	4.31664e-47	2939.68	2834.44	2796.73	4811.1	5342.85	5104.68
J3KQV8	SYNJ1	Synaptojanin-1 OS=Homo sapiens OX=9606 GN=SYNJ1 PE=1 SV=1	1274.64	0.828846	1.77626	0.174482	4.75032	2.03091e-06	2.97641e-05	821.727	791.411	1141.83	1563.68	1674.13	1655.06
E9PG19	FCHSD2	F-BAR and double SH3 domains protein 2 OS=Homo sapiens OX=9606 GN=FCHSD2 PE=1 SV=1	643.933	0.823288	1.76943	0.152978	5.38176	7.37609e-08	1.2368e-06	484.8	456.361	453.765	684.684	939.551	844.438
P09769	FGR	Tyrosine-protein kinase Fgr OS=Homo sapiens OX=9606 GN=FGR PE=1 SV=2	985.64	0.819919	1.76531	0.156292	5.24608	1.55373e-07	2.50929e-06	631.737	643.142	864.032	1286.96	1268.34	1219.63
Q8NDI1	EHBP1	EH domain-binding protein 1 OS=Homo sapiens OX=9606 GN=EHBP1 PE=1 SV=3	571.544	0.816099	1.76064	0.270347	3.01871	0.00253851	0.0197705	363.132	435.18	443.879	492.403	839.665	855.007
O14757	CHEK1	Serine/threonine-protein kinase Chk1 OS=Homo sapiens OX=9606 GN=CHEK1 PE=1 SV=2	915.117	0.813616	1.75761	0.138957	5.85516	4.76558e-09	9.11697e-08	762.764	620.998	606.997	1053.99	1251.69	1194.26
Q12849	GRSF1	G-rich sequence factor 1 OS=Homo sapiens OX=9606 GN=GRSF1 PE=1 SV=3	2126.74	0.812404	1.75614	0.142091	5.71748	1.08118e-08	1.98832e-07	1589.17	1528.91	1511.56	2465.07	2424.31	3241.42
Q15208	STK38	Serine/threonine-protein kinase 38 OS=Homo sapiens OX=9606 GN=STK38 PE=1 SV=1	2595.22	0.804737	1.74683	0.0371459	21.6642	4.46304e-104	1.49669e-101	1936.39	1881.29	1850.65	3332.88	3313.92	3256.21
Q9Y5Z4	HEBP2	Heme-binding protein 2 OS=Homo sapiens OX=9606 GN=HEBP2 PE=1 SV=1	2746.35	0.799605	1.74062	0.0469594	17.0276	5.1284e-65	9.43129e-63	2094.56	1970.82	1946.54	3516	3543.87	3406.29
O15541	RNF113A	E3 ubiquitin-protein ligase RNF113A OS=Homo sapiens OX=9606 GN=RNF113A PE=1 SV=1	1374.28	0.793457	1.73322	0.14382	5.517	3.44833e-08	6.01191e-07	972.408	1035.96	1008.37	1431.43	1865.58	1931.96
Q8NI60	COQ8A	Atypical kinase COQ8A, mitochondrial OS=Homo sapiens OX=9606 GN=COQ8A PE=1 SV=1	1661.67	0.786836	1.72529	0.214508	3.66809	0.000244368	0.00245272	866.65	1397	1394.91	2095.76	2088.24	2127.48
Q7Z4G4	TRMT11	tRNA (guanine(10)-N2)-methyltransferase homolog OS=Homo sapiens OX=9606 GN=TRMT11 PE=1 SV=1	599.351	0.786717	1.72514	0.0744204	10.5712	4.05065e-26	1.77637e-24	448.3	425.552	445.856	788.455	746.022	741.922
P62820	RAB1A	Ras-related protein Rab-1A OS=Homo sapiens OX=9606 GN=RAB1A PE=1 SV=3	3038.98	0.7854	1.72357	0.217606	3.60927	0.000307062	0.00303917	1883.98	1860.1	2950.96	3516	4084.92	3937.89
P19623	SRM	Spermidine synthase OS=Homo sapiens OX=9606 GN=SRM PE=1 SV=1	2369.05	0.782403	1.71999	0.198788	3.93586	8.28993e-05	0.000933521	1515.23	1449.96	2260.92	3006.3	3018.43	2963.46
Q8IWT6	LRRC8A	Volume-regulated anion channel subunit LRRC8A OS=Homo sapiens OX=9606 GN=LRRC8A PE=1 SV=1	534.231	0.778284	1.71509	0.0814006	9.56116	1.16446e-21	4.31077e-20	420.222	374.524	385.552	674.511	677.351	673.225
Q9BY44	EIF2A	Eukaryotic translation initiation factor 2A OS=Homo sapiens OX=9606 GN=EIF2A PE=1 SV=3	2374.98	0.7782	1.71499	0.282246	2.75718	0.0058303	0.0383374	1718.33	1624.22	1906.01	1863.81	3590.69	3546.85
P83111	LACTB	Serine beta-lactamase-like protein LACTB, mitochondrial OS=Homo sapiens OX=9606 GN=LACTB PE=1 SV=2	1305.28	0.77281	1.70859	0.283928	2.72185	0.00649168	0.0418182	983.639	969.526	938.177	1025.5	1998.76	1916.1
G3V5T9	CDK2	Cyclin-dependent kinase 2 OS=Homo sapiens OX=9606 GN=CDK2 PE=1 SV=1	1011.71	0.764896	1.69925	0.0584283	13.0912	3.69791e-39	2.70279e-37	785.226	736.532	726.617	1274.75	1271.46	1275.64
O43175	PHGDH	D-3-phosphoglycerate dehydrogenase OS=Homo sapiens OX=9606 GN=PHGDH PE=1 SV=4	9385.97	0.763294	1.69736	0.0437004	17.4665	2.57647e-68	5.24589e-66	7119.45	6911.85	6846.02	11269.3	12229.8	11939.4
O00291	HIP1	Huntingtin-interacting protein 1 OS=Homo sapiens OX=9606 GN=HIP1 PE=1 SV=5	1148.62	0.762362	1.69627	0.0526754	14.4728	1.79929e-47	1.76858e-45	871.33	852.066	832.397	1457.88	1463.95	1414.09
O14656	TOR1A	Torsin-1A OS=Homo sapiens OX=9606 GN=TOR1A PE=1 SV=1	469.113	0.761051	1.69472	0.0801281	9.49792	2.14123e-21	7.82511e-20	353.773	351.417	339.088	573.792	588.91	607.7
C9JFD3	NCOR2	Nuclear receptor corepressor 2 OS=Homo sapiens OX=9606 GN=NCOR2 PE=1 SV=1	302.968	0.761042	1.69471	0.12105	6.28699	3.23676e-10	6.78411e-09	248.951	206.999	218.479	389.649	391.22	362.506
P13639	EEF2	Elongation factor 2 OS=Homo sapiens OX=9606 GN=EEF2 PE=1 SV=4	25556.4	0.757048	1.69003	0.130872	5.78465	7.26617e-09	1.36265e-07	18918.4	18721.4	19362.6	26384.3	32877	37075
Q9Y3C0	WASHC3	WASH complex subunit 3 OS=Homo sapiens OX=9606 GN=WASHC3 PE=1 SV=1	644.727	0.755637	1.68838	0.0670504	11.2697	1.85212e-29	9.26221e-28	484.8	472.728	481.446	819.993	818.856	790.538
Q9NRN7	AASDHPPT	L-aminoadipate-semialdehyde dehydrogenase-phosphopantetheinyl transferase OS=Homo sapiens OX=9606 GN=AASDHPPT PE=1 SV=2	1185.07	0.740318	1.67054	0.0493031	15.0157	5.79817e-51	6.3568e-49	899.407	873.248	889.735	1469.07	1499.33	1479.62
P40926	MDH2	Malate dehydrogenase, mitochondrial OS=Homo sapiens OX=9606 GN=MDH2 PE=1 SV=3	18987.2	0.737667	1.66748	0.190267	3.87701	0.000105747	0.00115271	12102.2	11972.3	18634	23977.2	23232.8	24004.7
A6NHB5	ZMYM3	Zinc finger MYM-type protein 3 OS=Homo sapiens OX=9606 GN=ZMYM3 PE=1 SV=1	1408.42	0.735597	1.66509	0.176654	4.16404	3.12661e-05	0.000380649	935.907	1002.26	1232.78	1593.19	1607.54	2078.86
Q9BV44	THUMPD3	THUMP domain-containing protein 3 OS=Homo sapiens OX=9606 GN=THUMPD3 PE=1 SV=1	1632.3	0.731183	1.66	0.0469426	15.5761	1.05816e-54	1.37104e-52	1226.04	1241.03	1214.98	2080.5	2059.11	1972.12
Q13546	RIPK1	Receptor-interacting serine/threonine-protein kinase 1 OS=Homo sapiens OX=9606 GN=RIPK1 PE=1 SV=3	1845.28	0.731067	1.65987	0.21024	3.47729	0.000506514	0.00472608	993.934	1610.74	1558.03	2311.45	2340.03	2257.47
Q5T447	HECTD3	E3 ubiquitin-protein ligase HECTD3 OS=Homo sapiens OX=9606 GN=HECTD3 PE=1 SV=1	901.798	0.730239	1.65891	0.0574907	12.7019	5.77462e-37	3.78403e-35	686.956	684.542	663.347	1147.58	1110.19	1118.17
Q9BXB4	OSBPL11	Oxysterol-binding protein-related protein 11 OS=Homo sapiens OX=9606 GN=OSBPL11 PE=1 SV=2	219.926	0.729454	1.65801	0.117315	6.21792	5.03786e-10	1.04821e-08	168.463	154.046	173.993	274.688	277.808	270.558
Q8TDX7	NEK7	Serine/threonine-protein kinase Nek7 OS=Homo sapiens OX=9606 GN=NEK7 PE=1 SV=1	1563.47	0.728534	1.65695	0.138115	5.27482	1.32885e-07	2.1707e-06	965.856	1263.18	1301.98	1950.28	1965.46	1934.07
A0A087WSV8	NUCB2	Nucleobindin 2, isoform CRA_b OS=Homo sapiens OX=9606 GN=NUCB2 PE=1 SV=1	2960.69	0.725307	1.65325	0.267689	2.70952	0.00673813	0.0430651	1876.49	1828.33	2990.5	2893.38	3789.42	4386.01
Q969F9	HPS3	Hermansky-Pudlak syndrome 3 protein OS=Homo sapiens OX=9606 GN=HPS3 PE=1 SV=1	334.528	0.724544	1.65238	0.0932898	7.76659	8.06243e-15	2.15793e-13	260.182	251.287	245.172	427.292	406.827	416.406
Q70UQ0	IKBIP	Inhibitor of nuclear factor kappa-B kinase-interacting protein OS=Homo sapiens OX=9606 GN=IKBIP PE=1 SV=1	4621.21	0.724444	1.65226	0.254167	2.85027	0.00436822	0.0308973	2771.22	2772.83	4910.35	5717.57	5802.74	5752.54
Q96EW2	HSPBAP1	HSPB1-associated protein 1 OS=Homo sapiens OX=9606 GN=HSPBAP1 PE=1 SV=1	588.983	0.723749	1.65147	0.0776744	9.31773	1.18861e-20	4.15723e-19	467.018	417.85	447.833	743.691	732.496	725.012
Q06203	PPAT	Amidophosphoribosyltransferase OS=Homo sapiens OX=9606 GN=PPAT PE=1 SV=1	1831.25	0.71888	1.6459	0.169653	4.23735	2.26175e-05	0.000284015	1299.98	1304.58	1548.14	2068.3	2009.16	2757.37
Q93075	TATDN2	Putative deoxyribonuclease TATDN2 OS=Homo sapiens OX=9606 GN=TATDN2 PE=1 SV=2	118.603	0.714723	1.64117	0.162379	4.40156	1.07476e-05	0.000143494	84.2317	96.2787	88.9735	152.604	137.343	152.189
P42331	ARHGAP25	Rho GTPase-activating protein 25 OS=Homo sapiens OX=9606 GN=ARHGAP25 PE=1 SV=2	9543.39	0.711632	1.63766	0.0196179	36.2746	4.06911e-288	8.12559e-285	7314.12	7238.23	7155.45	11924.5	11763.6	11864.4
Q10713	PMPCA	Mitochondrial-processing peptidase subunit alpha OS=Homo sapiens OX=9606 GN=PMPCA PE=1 SV=2	3213.58	0.709254	1.63496	0.0778656	9.1087	8.33733e-20	2.86332e-18	2438.97	2486.88	2391.41	3623.84	4255.55	4084.8
O14929	HAT1	Histone acetyltransferase type B catalytic subunit OS=Homo sapiens OX=9606 GN=HAT1 PE=1 SV=1	2079.95	0.707742	1.63325	0.0405992	17.4324	4.68528e-68	9.21061e-66	1595.72	1598.23	1545.17	2627.84	2576.22	2536.48
Q9UKB1	FBXW11	F-box/WD repeat-containing protein 11 OS=Homo sapiens OX=9606 GN=FBXW11 PE=1 SV=1	185.259	0.706883	1.63227	0.125892	5.61501	1.96551e-08	3.56859e-07	137.578	149.232	135.437	229.924	223.703	235.682
Q8N5C6	SRBD1	S1 RNA-binding domain-containing protein 1 OS=Homo sapiens OX=9606 GN=SRBD1 PE=1 SV=2	445.079	0.704774	1.62989	0.146096	4.82404	1.40682e-06	2.10506e-05	331.311	334.087	349.963	498.507	511.915	644.69
Q9Y3Z3	SAMHD1	Deoxynucleoside triphosphate triphosphohydrolase SAMHD1 OS=Homo sapiens OX=9606 GN=SAMHD1 PE=1 SV=2	1358.81	0.704596	1.62969	0.170887	4.12318	3.73678e-05	0.000445678	1059.45	1023.44	1017.26	1312.4	1875.98	1864.32
P29466	CASP1	Caspase-1 OS=Homo sapiens OX=9606 GN=CASP1 PE=1 SV=1	5062.11	0.69978	1.62426	0.0851002	8.223	1.98469e-16	5.77281e-15	3840.03	3843.45	3890.12	5574.12	6551.89	6673.07
E9PAU2	RAVER1	Ribonucleoprotein PTB-binding 1 OS=Homo sapiens OX=9606 GN=RAVER1 PE=1 SV=1	1953.92	0.699599	1.62405	0.0503927	13.8829	8.03703e-44	6.94229e-42	1567.64	1442.25	1457.19	2416.23	2432.64	2407.55
Q2TAY7	SMU1	WD40 repeat-containing protein SMU1 OS=Homo sapiens OX=9606 GN=SMU1 PE=1 SV=2	6107.73	0.689402	1.61262	0.239245	2.88157	0.00395698	0.0284832	3573.29	4048.52	6405.11	6978.08	7934.68	7706.69
S4R3E2	DNAJC12	DnaJ homolog subfamily C member 12 OS=Homo sapiens OX=9606 GN=DNAJC12 PE=1 SV=1	599.509	0.689368	1.61258	0.0758044	9.09402	9.54392e-20	3.20058e-18	440.812	481.393	454.754	752.848	717.93	749.32
Q00577	PURA	Transcriptional activator protein Pur-alpha OS=Homo sapiens OX=9606 GN=PURA PE=1 SV=2	2759.89	0.688605	1.61172	0.050517	13.6311	2.61429e-42	2.09916e-40	2197.51	2090.21	2052.32	3486.5	3455.43	3277.35
O00115	DNASE2	Deoxyribonuclease-2-alpha OS=Homo sapiens OX=9606 GN=DNASE2 PE=1 SV=2	2846.39	0.68157	1.60388	0.0361346	18.862	2.34204e-79	5.56333e-77	2248.99	2144.13	2165.02	3485.48	3542.83	3491.89
O43765	SGTA	Small glutamine-rich tetratricopeptide repeat-containing protein alpha OS=Homo sapiens OX=9606 GN=SGTA PE=1 SV=1	1629.91	0.678307	1.60026	0.160231	4.23331	2.30275e-05	0.000287894	1026.69	1402.78	1331.64	1786.49	2135.06	2096.83
Q15042	RAB3GAP1	Rab3 GTPase-activating protein catalytic subunit OS=Homo sapiens OX=9606 GN=RAB3GAP1 PE=1 SV=3	1266.04	0.677426	1.59928	0.153603	4.41023	1.03262e-05	0.000138191	1004.23	990.708	927.302	1409.05	1390.08	1874.89
P62937-2	PPIA	Isoform 2 of Peptidyl-prolyl cis-trans isomerase A OS=Homo sapiens OX=9606 GN=PPIA	14067	0.673581	1.59503	0.151172	4.45574	8.36031e-06	0.000113481	9694.13	9437.24	13393.5	17525.1	17266.7	17085.3
P05362	ICAM1	Intercellular adhesion molecule 1 OS=Homo sapiens OX=9606 GN=ICAM1 PE=1 SV=2	734.435	0.670873	1.59204	0.228416	2.93707	0.00331331	0.0246273	580.263	568.044	551.636	639.92	1037.36	1029.39
Q9H0U4	RAB1B	Ras-related protein Rab-1B OS=Homo sapiens OX=9606 GN=RAB1B PE=1 SV=1	16232.1	0.667953	1.58882	0.0908702	7.35063	1.97279e-13	4.84779e-12	12610.4	12639.5	12370.3	17409.1	21081.1	21282.2
P08571	CD14	Monocyte differentiation antigen CD14 OS=Homo sapiens OX=9606 GN=CD14 PE=1 SV=2	2428.37	0.66531	1.58591	0.0644029	10.3304	5.13234e-25	2.18354e-23	1877.43	1916.91	1839.78	2890.32	2854.03	3191.74
Q14C86-6	GAPVD1	Isoform 6 of GTPase-activating protein and VPS9 domain-containing protein 1 OS=Homo sapiens OX=9606 GN=GAPVD1	8081.32	0.665086	1.58566	0.22379	2.97191	0.0029595	0.0224961	5220.49	5110.47	8421.84	9011.79	10114.5	10608.8
Q9NZL4-3	HSPBP1	Isoform 3 of Hsp70-binding protein 1 OS=Homo sapiens OX=9606 GN=HSPBP1	901.82	0.66395	1.58442	0.200868	3.3054	0.000948393	0.00839564	707.546	700.909	685.096	952.25	948.916	1416.2
Q9Y2Q3	GSTK1	Glutathione S-transferase kappa 1 OS=Homo sapiens OX=9606 GN=GSTK1 PE=1 SV=3	3519.15	0.661961	1.58223	0.159137	4.15969	3.18676e-05	0.000386547	2699.16	2769.94	2707.76	3376.62	4835.1	4726.32
Q96PU4	UHRF2	E3 ubiquitin-protein ligase UHRF2 OS=Homo sapiens OX=9606 GN=UHRF2 PE=1 SV=1	376.804	0.659992	1.58007	0.0852381	7.74292	9.71597e-15	2.58835e-13	291.067	297.501	287.681	465.952	456.77	461.852
O95782	AP2A1	AP-2 complex subunit alpha-1 OS=Homo sapiens OX=9606 GN=AP2A1 PE=1 SV=3	6616.15	0.658724	1.57869	0.127538	5.16493	2.40531e-07	3.80907e-06	4434.33	5550.47	5409.59	7159.17	8526.71	8616.65
P22570-7	FDXR	Isoform 7 of NADPH:adrenodoxin oxidoreductase, mitochondrial OS=Homo sapiens OX=9606 GN=FDXR	2048.14	0.656276	1.57601	0.110949	5.91509	3.31685e-09	6.47581e-08	1539.57	1541.42	1689.51	2192.41	2729.17	2596.73
Q9H2F5	EPC1	Enhancer of polycomb homolog 1 OS=Homo sapiens OX=9606 GN=EPC1 PE=1 SV=1	307.273	0.65416	1.5737	0.0978314	6.6866	2.2841e-11	5.20866e-10	247.08	241.66	227.377	368.285	376.653	382.586
O00214-2	LGALS8	Isoform 2 of Galectin-8 OS=Homo sapiens OX=9606 GN=LGALS8	1274.94	0.651706	1.57102	0.0585932	11.1225	9.74567e-29	4.74872e-27	1048.22	965.675	960.914	1557.58	1576.32	1540.91
P51692	STAT5B	Signal transducer and activator of transcription 5B OS=Homo sapiens OX=9606 GN=STAT5B PE=1 SV=2	2123.84	0.650618	1.56984	0.0732093	8.88709	6.2728e-19	2.02041e-17	1645.33	1687.77	1625.25	2420.3	2567.9	2796.47
Q8N0Z6	TTC5	Tetratricopeptide repeat protein 5 OS=Homo sapiens OX=9606 GN=TTC5 PE=1 SV=2	1738.96	0.647932	1.56692	0.117869	5.49706	3.86168e-08	6.67134e-07	1149.29	1459.58	1456.2	2124.25	2142.34	2102.11
Q14258	TRIM25	E3 ubiquitin/ISG15 ligase TRIM25 OS=Homo sapiens OX=9606 GN=TRIM25 PE=1 SV=2	4719.77	0.646704	1.56559	0.18069	3.57908	0.00034481	0.0033718	2779.64	3917.58	4340.92	5656.53	5602.97	6020.98
Q05516	ZBTB16	Zinc finger and BTB domain-containing protein 16 OS=Homo sapiens OX=9606 GN=ZBTB16 PE=1 SV=2	542.825	0.646097	1.56493	0.0748897	8.62731	6.28094e-18	1.93555e-16	422.094	416.887	431.027	681.632	665.906	639.406
E9PSI1	3	Transmembrane 9 superfamily member OS=Homo sapiens OX=9606 PE=3 SV=1	3118.86	0.644657	1.56337	0.200325	3.21805	0.00129065	0.0109494	1934.52	2405.04	2960.84	3497.69	3476.24	4438.85
Q9Y3B8	REXO2	Oligoribonuclease, mitochondrial OS=Homo sapiens OX=9606 GN=REXO2 PE=1 SV=3	2364.66	0.642464	1.56099	0.235273	2.73071	0.00631973	0.0409884	1631.29	1589.56	2319.24	2214.8	3227.56	3205.48
Q9H5Q4	TFB2M	Dimethyladenosine transferase 2, mitochondrial OS=Homo sapiens OX=9606 GN=TFB2M PE=1 SV=1	575.108	0.641069	1.55948	0.0725153	8.84047	9.5315e-19	3.0357e-17	442.684	439.994	465.628	684.684	712.727	704.931
Q7Z2T5	TRMT1L	TRMT1-like protein OS=Homo sapiens OX=9606 GN=TRMT1L PE=1 SV=2	4857.47	0.640976	1.55938	0.121991	5.25429	1.48595e-07	2.4135e-06	3591.08	3410.19	4386.4	5603.63	5797.54	6356.01
P18669	PGAM1	Phosphoglycerate mutase 1 OS=Homo sapiens OX=9606 GN=PGAM1 PE=1 SV=2	7296.57	0.640448	1.55881	0.153293	4.17794	2.94162e-05	0.000359105	5210.2	5070.04	6829.21	7848.94	9372.62	9448.41
Q5TFE4	NT5DC1	5'-nucleotidase domain-containing protein 1 OS=Homo sapiens OX=9606 GN=NT5DC1 PE=1 SV=1	2176.86	0.637971	1.55614	0.0413244	15.4381	9.06899e-54	1.12396e-51	1647.2	1736.87	1726.09	2619.71	2653.22	2678.11
P08670	VIM	Vimentin OS=Homo sapiens OX=9606 GN=VIM PE=1 SV=4	12238.2	0.635526	1.5535	0.0855822	7.42592	1.11999e-13	2.77611e-12	9188.74	9018.43	10549.3	13923.6	15607.2	15141.8
Q00688	FKBP3	Peptidyl-prolyl cis-trans isomerase FKBP3 OS=Homo sapiens OX=9606 GN=FKBP3 PE=1 SV=1	3527.39	0.632601	1.55036	0.0425645	14.8621	5.80331e-50	6.12679e-48	2833.93	2730.46	2733.46	4231.21	4184.8	4450.47
Q6IN85	PPP4R3A	Serine/threonine-protein phosphatase 4 regulatory subunit 3A OS=Homo sapiens OX=9606 GN=PPP4R3A PE=1 SV=1	2039.06	0.632008	1.54972	0.1635	3.8655	0.000110862	0.00120157	1474.99	1484.62	1838.79	2238.2	2275.52	2922.24
Q9NU19	TBC1D22B	TBC1 domain family member 22B OS=Homo sapiens OX=9606 GN=TBC1D22B PE=1 SV=3	134.396	0.630671	1.54829	0.142119	4.43764	9.09518e-06	0.000122581	106.693	105.907	103.802	163.795	159.193	166.985
Q9UHQ4-2	BCAP29	Isoform 2 of B-cell receptor-associated protein 29 OS=Homo sapiens OX=9606 GN=BCAP29	1528.85	0.627438	1.54482	0.0592918	10.5822	3.60398e-26	1.59273e-24	1271.9	1180.38	1151.71	1861.77	1819.8	1887.57
Q96NB3	ZNF830	Zinc finger protein 830 OS=Homo sapiens OX=9606 GN=ZNF830 PE=1 SV=2	642.304	0.624666	1.54185	0.0720767	8.66668	4.44884e-18	1.39356e-16	525.98	501.612	488.366	803.716	764.751	769.4
Q13045	FLII	Protein flightless-1 homolog OS=Homo sapiens OX=9606 GN=FLII PE=1 SV=2	9622.48	0.621204	1.53816	0.21216	2.928	0.00341147	0.0252254	6384.76	6233.08	10129.1	10923.4	11966.5	12098
P22626	HNRNPA2B1	Heterogeneous nuclear ribonucleoproteins A2/B1 OS=Homo sapiens OX=9606 GN=HNRNPA2B1 PE=1 SV=2	17588.7	0.620338	1.53724	0.214569	2.89109	0.00383904	0.0277746	11842	11696.9	18054.7	17709.2	23343.1	22886.5
Q9UHB6-4	LIMA1	Isoform 4 of LIM domain and actin-binding protein 1 OS=Homo sapiens OX=9606 GN=LIMA1	1856.36	0.615006	1.53156	0.0427908	14.3724	7.71167e-47	7.32737e-45	1460.95	1435.52	1503.65	2245.32	2281.77	2210.97
Q9UHQ9	CYB5R1	NADH-cytochrome b5 reductase 1 OS=Homo sapiens OX=9606 GN=CYB5R1 PE=1 SV=1	4712.88	0.614931	1.53148	0.202745	3.03302	0.00242117	0.0189603	3592.01	3481.44	4096.74	4159.99	6480.09	6466.98
Q96F86	EDC3	Enhancer of mRNA-decapping protein 3 OS=Homo sapiens OX=9606 GN=EDC3 PE=1 SV=1	1576.6	0.614503	1.53103	0.067519	9.10119	8.93497e-20	3.05019e-18	1305.59	1226.59	1205.1	1975.72	1946.73	1799.85
Q9Y6G5	COMMD10	COMM domain-containing protein 10 OS=Homo sapiens OX=9606 GN=COMMD10 PE=1 SV=1	1305.43	0.614402	1.53092	0.0926311	6.63278	3.29427e-11	7.36495e-10	1029.5	1037.88	1027.15	1486.37	1496.21	1755.46
P54619-3	PRKAG1	Isoform 3 of 5'-AMP-activated protein kinase subunit gamma-1 OS=Homo sapiens OX=9606 GN=PRKAG1	2422.87	0.614366	1.53088	0.216704	2.83504	0.00458196	0.0321101	1595.72	1612.67	2535.75	2764.17	3052.76	2976.14
Q96TA1	FAM129B	Niban-like protein 1 OS=Homo sapiens OX=9606 GN=FAM129B PE=1 SV=3	2740.8	0.613068	1.52951	0.0401776	15.2589	1.43569e-52	1.74146e-50	2182.54	2213.45	2104.72	3340	3236.93	3367.18
F5H211	ATXN3	Ataxin-3 OS=Homo sapiens OX=9606 GN=ATXN3 PE=1 SV=2	1759.37	0.611026	1.52735	0.13995	4.36603	1.26525e-05	0.000166203	1399.18	1382.56	1394.91	1942.14	1901.99	2535.43
Q9UL03	INTS6	Integrator complex subunit 6 OS=Homo sapiens OX=9606 GN=INTS6 PE=1 SV=1	679.553	0.609539	1.52577	0.063292	9.63058	5.93928e-22	2.22762e-20	534.403	535.31	544.716	828.132	818.856	815.903
P86790	CCZ1B	Vacuolar fusion protein CCZ1 homolog B OS=Homo sapiens OX=9606 GN=CCZ1B PE=1 SV=1	1005.37	0.608391	1.52456	0.0532301	11.4295	2.97981e-30	1.53044e-28	789.906	807.778	791.864	1231.01	1216.32	1195.32
P26447	S100A4	Protein S100-A4 OS=Homo sapiens OX=9606 GN=S100A4 PE=1 SV=1	10417.3	0.607963	1.52411	0.0205144	29.6359	5.15521e-193	4.89831e-190	8333.32	8228.94	8200.39	12737.4	12586.7	12417.2
Q9NSK0-3	KLC4	Isoform 3 of Kinesin light chain 4 OS=Homo sapiens OX=9606 GN=KLC4	989.924	0.606572	1.52264	0.183657	3.30274	0.000957447	0.00844954	794.585	782.746	777.036	914.608	1350.54	1320.03
Q16666	IFI16	Gamma-interferon-inducible protein 16 OS=Homo sapiens OX=9606 GN=IFI16 PE=1 SV=3	3513	0.606306	1.52236	0.114322	5.30351	1.13595e-07	1.8717e-06	2879.79	2781.49	2694.91	3626.89	4660.3	4434.62
P69905	HBA1	Hemoglobin subunit alpha OS=Homo sapiens OX=9606 GN=HBA1 PE=1 SV=2	4316.09	0.604996	1.52097	0.160167	3.77728	0.000158552	0.00165439	3554.58	3498.77	3218.86	4098.95	5890.14	5635.22
Q16134	ETFDH	Electron transfer flavoprotein-ubiquinone oxidoreductase, mitochondrial OS=Homo sapiens OX=9606 GN=ETFDH PE=1 SV=2	3910.09	0.602551	1.5184	0.130821	4.60591	4.10668e-06	5.73828e-05	2556.9	3389.01	3370.12	4768.37	4787.24	4588.92
P50452	SERPINB8	Serpin B8 OS=Homo sapiens OX=9606 GN=SERPINB8 PE=1 SV=2	7876.92	0.600291	1.51602	0.0724439	8.28629	1.16838e-16	3.43348e-15	6426.88	6254.26	6102.6	9104.37	8993.89	10379.5
B4E0Y9	STK26	Serine/threonine-protein kinase 26 OS=Homo sapiens OX=9606 GN=STK26 PE=1 SV=1	8253.77	0.59839	1.51403	0.0359537	16.6433	3.38165e-62	5.84206e-60	6614.99	6410.24	6673.02	9759.55	9782.57	10282.3
Q8N4J0	CARNMT1	Carnosine N-methyltransferase OS=Homo sapiens OX=9606 GN=CARNMT1 PE=1 SV=1	1232.74	0.595377	1.51087	0.0504972	11.7903	4.3799e-32	2.44802e-30	991.126	988.782	965.857	1512.82	1492.04	1445.8
Q8WYQ5	DGCR8	Microprocessor complex subunit DGCR8 OS=Homo sapiens OX=9606 GN=DGCR8 PE=1 SV=1	1008.26	0.591534	1.50685	0.0537317	11.009	3.45731e-28	1.64251e-26	804.88	813.555	794.83	1231.01	1218.4	1186.86
P14780	MMP9	Matrix metalloproteinase-9 OS=Homo sapiens OX=9606 GN=MMP9 PE=1 SV=3	1408.27	0.59019	1.50544	0.0853174	6.91758	4.59425e-12	1.07343e-10	1010.78	1162.08	1200.15	1700.01	1682.45	1694.16
P16152	CBR1	Carbonyl reductase [NADPH] 1 OS=Homo sapiens OX=9606 GN=CBR1 PE=1 SV=3	5675.74	0.589873	1.50511	0.0686561	8.5917	8.56886e-18	2.6264e-16	4468.96	4609.82	4514.91	6234.39	7122.07	7104.27
O43390	HNRNPR	Heterogeneous nuclear ribonucleoprotein R OS=Homo sapiens OX=9606 GN=HNRNPR PE=1 SV=1	15931.1	0.589834	1.50507	0.151247	3.89982	9.62644e-05	0.00106357	11560.3	13063.1	13533.9	15350	20370.5	21709.1
O00257	CBX4	E3 SUMO-protein ligase CBX4 OS=Homo sapiens OX=9606 GN=CBX4 PE=1 SV=3	826.198	0.589588	1.50482	0.0648787	9.08755	1.01299e-19	3.37723e-18	671.046	662.397	645.552	1001.08	1024.87	952.239
Q6ZN06	ZNF813	Zinc finger protein 813 OS=Homo sapiens OX=9606 GN=ZNF813 PE=2 SV=2	1043.38	0.589397	1.50462	0.2148	2.74394	0.00607066	0.0396891	759.021	674.914	1065.71	1125.2	1366.15	1269.3
P55010	EIF5	Eukaryotic translation initiation factor 5 OS=Homo sapiens OX=9606 GN=EIF5 PE=1 SV=2	2315.62	0.58804	1.5032	0.0740276	7.94353	1.96513e-15	5.51882e-14	1860.58	1883.21	1806.16	2550.53	2851.95	2941.27
Q9BRK5	SDF4	45 kDa calcium-binding protein OS=Homo sapiens OX=9606 GN=SDF4 PE=1 SV=1	2750.54	0.587362	1.5025	0.042906	13.6895	1.17331e-42	9.69424e-41	2267.7	2195.15	2131.41	3383.74	3280.63	3244.59
P62191	PSMC1	26S proteasome regulatory subunit 4 OS=Homo sapiens OX=9606 GN=PSMC1 PE=1 SV=1	4778.35	0.586837	1.50195	0.0963136	6.09298	1.10826e-09	2.2565e-08	3640.68	3660.52	4158.03	5189.56	5940.09	6081.22
Q9BUK6	MSTO1	Protein misato homolog 1 OS=Homo sapiens OX=9606 GN=MSTO1 PE=1 SV=1	640.106	0.585913	1.50099	0.0684628	8.55812	1.1472e-17	3.49742e-16	499.775	522.793	513.081	746.743	778.277	779.969
P82933	MRPS9	28S ribosomal protein S9, mitochondrial OS=Homo sapiens OX=9606 GN=MRPS9 PE=1 SV=2	1181.05	0.581522	1.49643	0.0586533	9.91458	3.59772e-23	1.44441e-21	979.895	919.462	939.165	1461.95	1415.05	1370.76
Q3SXM5	HSDL1	Inactive hydroxysteroid dehydrogenase-like protein 1 OS=Homo sapiens OX=9606 GN=HSDL1 PE=1 SV=3	2130.64	0.580454	1.49532	0.0434185	13.3688	9.19757e-41	6.80979e-39	1736.11	1688.73	1698.41	2629.88	2547.09	2483.64
P04792	HSPB1	Heat shock protein beta-1 OS=Homo sapiens OX=9606 GN=HSPB1 PE=1 SV=2	315.732	-1.09563	0.46793	0.0995293	-11.0082	3.49044e-28	1.64455e-26	433.325	436.142	421.141	211.611	196.65	195.521
P05787-2	KRT8	Isoform 2 of Keratin, type II cytoskeletal 8 OS=Homo sapiens OX=9606 GN=KRT8	568.092	-1.16267	0.446685	0.0735867	-15.8	3.11021e-56	4.22174e-54	801.137	781.783	773.081	352.007	345.439	355.108
P05783	KRT18	Keratin, type I cytoskeletal 18 OS=Homo sapiens OX=9606 GN=KRT18 PE=1 SV=2	155.051	-2.85221	0.138484	0.183283	-15.5618	1.3235e-54	1.67672e-52	267.669	264.766	284.715	38.6597	34.3358	40.161

## Sheet: sh-SPARC HL60 vs Control
Supplementary Table Quantitative proteomic analysis of SPARC knockdown HL60 cells ( sh-SPARC vs control, significant changed proteins )
Accession	Name	Description	baseMean	log2FoldChange	Fold Change	lfcSE	stat	pvalue	padj	Control-1	Control-2	Control-3	sh-SPARC-1	sh-SPARC-2	sh-SPARC-3
P51148-2	RAB5C	Isoform 2 of Ras-related protein Rab-5C OS=Homo sapiens OX=9606 GN=RAB5C	926.983	5.36954	41.3422	0.22112	24.2834	2.93245e-130	2.23369e-127	41.576	48.1758	41.592	1434.23	2046.11	1950.21
Q9Y5Z9	UBIAD1	UbiA prenyltransferase domain-containing protein 1 OS=Homo sapiens OX=9606 GN=UBIAD1 PE=1 SV=1	417.198	3.84117	14.3321	0.149822	25.6383	5.71105e-145	7.61283e-142	48.1904	60.7015	54.4657	812.425	778.289	749.115
P61586	RHOA	Transforming protein RhoA OS=Homo sapiens OX=9606 GN=RHOA PE=1 SV=1	1231.52	2.96602	7.81376	0.689977	4.29872	1.71789e-05	0.000186888	280.638	278.456	279.26	352.696	3157.66	3040.4
P17252	PRKCA	Protein kinase C alpha type OS=Homo sapiens OX=9606 GN=PRKCA PE=1 SV=4	458.083	2.60013	6.06341	0.125362	20.7409	1.48034e-95	5.63799e-93	132.287	135.856	120.815	725.78	811.407	822.352
P69905	HBA1	Hemoglobin subunit alpha OS=Homo sapiens OX=9606 GN=HBA1 PE=1 SV=2	1931.74	2.19319	4.57314	0.337933	6.49	8.58343e-11	1.93109e-09	711.517	692.768	675.374	1644.22	4046.69	3819.86
Q9BY32	ITPA	Inosine triphosphate pyrophosphatase OS=Homo sapiens OX=9606 GN=ITPA PE=1 SV=2	543.366	2.12143	4.35124	0.0948303	22.3707	7.58511e-111	4.49376e-108	209.77	205.229	194.096	900.089	900.414	850.601
P19971-2	TYMP	Isoform 2 of Thymidine phosphorylase OS=Homo sapiens OX=9606 GN=TYMP	171.95	2.11864	4.34284	0.186051	11.3874	4.83199e-30	4.15551e-28	65.1988	66.4826	61.3977	288.477	304.278	245.869
Q8TB37	NUBPL	Iron-sulfur protein NUBPL OS=Homo sapiens OX=9606 GN=NUBPL PE=1 SV=3	196.648	2.11638	4.33604	0.149123	14.1922	1.02399e-45	1.76126e-43	76.5377	73.2272	71.3005	323.135	327.047	308.644
P09382	LGALS1	Galectin-1 OS=Homo sapiens OX=9606 GN=LGALS1 PE=1 SV=2	2508.38	2.08104	4.23111	0.186506	11.158	6.54451e-29	5.20826e-27	700.178	1085.88	1091.29	4153.86	4068.42	3950.64
P05109	S100A8	Protein S100-A8 OS=Homo sapiens OX=9606 GN=S100A8 PE=1 SV=1	2299.08	1.97818	3.93996	0.0660403	29.9541	3.88589e-197	1.03598e-193	984.596	924.975	882.344	3700.25	3786.91	3515.4
P49770	EIF2B2	Translation initiation factor eIF-2B subunit beta OS=Homo sapiens OX=9606 GN=EIF2B2 PE=1 SV=3	822.637	1.90362	3.74152	0.0766414	24.8381	3.47944e-136	3.09206e-133	360.011	336.267	344.619	1337.39	1296.8	1260.73
P06702	S100A9	Protein S100-A9 OS=Homo sapiens OX=9606 GN=S100A9 PE=1 SV=1	873.085	1.84075	3.58196	0.0739315	24.898	7.81376e-137	8.33259e-134	392.138	377.698	373.337	1401.61	1376.49	1317.23
P05120	SERPINB2	Plasminogen activator inhibitor 2 OS=Homo sapiens OX=9606 GN=SERPINB2 PE=1 SV=2	180.413	1.83909	3.57784	0.158317	11.6165	3.39813e-31	3.07099e-29	85.9868	77.0812	73.2811	295.612	270.124	280.395
Q9H0K6	PUS7L	Pseudouridylate synthase 7 homolog-like protein OS=Homo sapiens OX=9606 GN=PUS7L PE=1 SV=1	454.594	1.83694	3.57253	0.652233	2.81639	0.00485662	0.0254127	98.2706	99.2421	399.085	400.606	875.575	854.786
O94763	URI1	Unconventional prefoldin RPB5 interactor 1 OS=Homo sapiens OX=9606 GN=URI1 PE=1 SV=3	761.361	1.71221	3.27663	0.0765951	22.3541	1.1016e-110	5.87375e-108	346.782	377.698	343.629	1173.28	1158.12	1168.66
Q8IV50	LYSMD2	LysM and putative peptidoglycan-binding domain-containing protein 2 OS=Homo sapiens OX=9606 GN=LYSMD2 PE=1 SV=1	1390.43	1.63207	3.09957	0.158622	10.2891	7.89511e-25	4.89497e-23	685.06	673.497	676.365	1666.64	2314.17	2326.86
P32519	ELF1	ETS-related transcription factor Elf-1 OS=Homo sapiens OX=9606 GN=ELF1 PE=1 SV=2	353.121	1.58042	2.99056	0.109098	14.4863	1.47991e-47	2.92255e-45	185.202	179.214	166.368	544.335	529.899	513.709
P19878	NCF2	Neutrophil cytosol factor 2 OS=Homo sapiens OX=9606 GN=NCF2 PE=1 SV=2	650.678	1.56566	2.96012	0.0793625	19.7279	1.24136e-86	4.41261e-84	333.553	340.121	311.94	971.444	964.581	982.428
Q9Y5Q9	GTF3C3	General transcription factor 3C polypeptide 3 OS=Homo sapiens OX=9606 GN=GTF3C3 PE=1 SV=1	293.555	1.54669	2.92146	0.544281	2.8417	0.0044873	0.023831	152.13	145.491	151.514	144.748	590.961	576.484
P14598	NCF1	Neutrophil cytosol factor 1 OS=Homo sapiens OX=9606 GN=NCF1 PE=1 SV=4	1633.92	1.50467	2.83761	0.0818471	18.384	1.76595e-75	5.53886e-73	769.157	872.945	913.043	2451.54	2419.73	2377.08
Q8IZP0	ABI1	Abl interactor 1 OS=Homo sapiens OX=9606 GN=ABI1 PE=1 SV=4	652.813	1.49375	2.81619	0.092018	16.2332	2.93759e-59	7.83162e-57	362.845	321.814	341.648	987.753	987.35	915.468
Q9UHQ4-2	BCAP29	Isoform 2 of B-cell receptor-associated protein 29 OS=Homo sapiens OX=9606 GN=BCAP29	536.873	1.44856	2.72936	0.0841205	17.2201	1.8772e-66	5.56067e-64	275.914	293.872	294.115	779.805	786.568	790.965
Q15652	JMJD1C	Probable JmjC domain-containing histone demethylation protein 2C OS=Homo sapiens OX=9606 GN=JMJD1C PE=1 SV=2	122.763	1.44524	2.72309	0.542688	2.66312	0.00774199	0.0374255	68.0335	69.3731	60.4074	67.2773	225.621	245.869
Q9UHG3	PCYOX1	Prenylcysteine oxidase 1 OS=Homo sapiens OX=9606 GN=PCYOX1 PE=1 SV=3	655.516	1.44413	2.72098	0.180578	7.99726	1.27221e-15	4.18731e-14	360.956	325.668	370.367	767.573	1119.83	988.706
Q8TEA1	NSUN6	Putative methyltransferase NSUN6 OS=Homo sapiens OX=9606 GN=NSUN6 PE=1 SV=1	269.222	1.40071	2.64032	0.229453	6.10457	1.03076e-09	2.02804e-08	163.469	146.454	133.688	296.632	440.892	434.194
P07203	GPX1	Glutathione peroxidase 1 OS=Homo sapiens OX=9606 GN=GPX1 PE=1 SV=4	1483.65	1.37945	2.6017	0.393102	3.50915	0.000449542	0.00335239	564.111	522.225	1385.41	2096.81	2127.87	2205.49
Q7Z5R6	APBB1IP	Amyloid beta A4 precursor protein-binding family B member 1-interacting protein OS=Homo sapiens OX=9606 GN=APBB1IP PE=1 SV=1	1244.48	1.3794	2.60161	0.34639	3.98223	6.82714e-05	0.000639759	619.861	582.927	870.46	1012.22	2232.41	2149
P61626	LYZ	Lysozyme C OS=Homo sapiens OX=9606 GN=LYZ PE=1 SV=1	4045.28	1.35273	2.55394	0.0410028	32.991	1.09211e-238	5.82311e-235	2282.9	2314.36	2232.1	5913.27	5907.54	5621.5
Q9UHY7	ENOPH1	Enolase-phosphatase E1 OS=Homo sapiens OX=9606 GN=ENOPH1 PE=1 SV=1	397.487	1.33277	2.51885	0.491169	2.71346	0.00665856	0.0329725	209.77	229.317	238.659	215.084	754.485	737.606
Q8WW59	SPRYD4	SPRY domain-containing protein 4 OS=Homo sapiens OX=9606 GN=SPRYD4 PE=1 SV=2	461.225	1.31823	2.49361	0.100658	13.0961	3.46423e-39	4.61782e-37	265.52	253.405	273.319	679.909	676.863	618.334
Q2KHT3	CLEC16A	Protein CLEC16A OS=Homo sapiens OX=9606 GN=CLEC16A PE=1 SV=2	196.226	1.31737	2.49211	0.136343	9.66215	4.36621e-22	2.30501e-20	108.665	115.622	112.892	283.38	270.124	286.672
A0A2R8Y5V9	TPM4	Tropomyosin alpha-4 chain OS=Homo sapiens OX=9606 GN=TPM4 PE=1 SV=1	1042.35	1.30509	2.47098	0.343999	3.79386	0.000148323	0.00127257	587.734	607.015	607.045	781.844	1899.15	1771.3
P62318	SNRPD3	Small nuclear ribonucleoprotein Sm D3 OS=Homo sapiens OX=9606 GN=SNRPD3 PE=1 SV=1	1675.6	1.27193	2.41485	0.434497	2.92738	0.00341836	0.0191164	992.155	996.275	955.625	937.805	2978.61	3193.15
O15525	MAFG	Transcription factor MafG OS=Homo sapiens OX=9606 GN=MAFG PE=1 SV=1	469.163	1.26125	2.39703	0.087828	14.3605	9.16031e-47	1.62809e-44	280.638	273.638	274.309	648.309	677.898	660.184
H3BN02	ITGAX	Integrin alpha-X OS=Homo sapiens OX=9606 GN=ITGAX PE=1 SV=1	68.3011	1.26125	2.39703	0.239168	5.27349	1.33854e-07	1.96074e-06	40.6311	44.3217	35.6503	100.916	99.356	88.9312
Q9ULW0	TPX2	Targeting protein for Xklp2 OS=Homo sapiens OX=9606 GN=TPX2 PE=1 SV=2	1151.69	1.25799	2.39162	0.399923	3.14558	0.00165757	0.0105473	339.223	857.529	840.752	1156.97	1875.34	1840.35
A0A1B0GUA3	KIF1BP	KIF1-binding protein OS=Homo sapiens OX=9606 GN=KIF1BP PE=1 SV=1	634.608	1.25275	2.38295	0.0903485	13.8657	1.02216e-43	1.65156e-41	392.138	378.662	354.522	890.915	937.672	853.74
Q13042	CDC16	Cell division cycle protein 16 homolog OS=Homo sapiens OX=9606 GN=CDC16 PE=1 SV=2	413.502	1.24815	2.37537	0.116666	10.6985	1.03393e-26	7.44048e-25	259.85	217.755	257.474	601.418	582.682	561.836
P16402	HIST1H1D	Histone H1.3 OS=Homo sapiens OX=9606 GN=HIST1H1D PE=1 SV=2	806.993	1.24497	2.37014	0.0861802	14.4461	2.65111e-47	5.04847e-45	491.353	479.831	465.434	1195.7	1058.76	1150.87
Q92520	FAM3C	Protein FAM3C OS=Homo sapiens OX=9606 GN=FAM3C PE=1 SV=1	844.698	1.24283	2.36663	0.370373	3.35562	0.000791865	0.00552647	507.417	507.773	490.191	592.244	1414.79	1555.77
O60711-2	LPXN	Isoform 2 of Leupaxin OS=Homo sapiens OX=9606 GN=LPXN	1672.7	1.24065	2.36305	0.23401	5.30169	1.14736e-07	1.69466e-06	822.072	796.827	1365.6	2372.04	2415.59	2264.08
Q9ULE6	PALD1	Paladin OS=Homo sapiens OX=9606 GN=PALD1 PE=1 SV=3	624.154	1.21999	2.32945	0.078551	15.5312	2.13412e-54	5.17233e-52	388.358	375.771	360.464	890.915	866.26	863.156
P12277	CKB	Creatine kinase B-type OS=Homo sapiens OX=9606 GN=CKB PE=1 SV=1	663.328	1.21259	2.31754	0.079695	15.2154	2.79515e-52	6.20989e-50	406.311	382.516	410.968	952.076	931.463	896.636
C9JFD3	NCOR2	Nuclear receptor corepressor 2 OS=Homo sapiens OX=9606 GN=NCOR2 PE=1 SV=1	652.902	1.20957	2.31269	0.167498	7.2214	5.14561e-13	1.42157e-11	360.956	363.245	458.502	852.179	833.142	1049.39
Q9H3Z4	DNAJC5	DnaJ homolog subfamily C member 5 OS=Homo sapiens OX=9606 GN=DNAJC5 PE=1 SV=1	1057.59	1.20859	2.31111	0.0638741	18.9214	7.5994e-80	2.5325e-77	662.382	638.811	614.967	1507.62	1474.82	1446.96
P04839	CYBB	Cytochrome b-245 heavy chain OS=Homo sapiens OX=9606 GN=CYBB PE=1 SV=2	3803.55	1.20425	2.30417	0.17573	6.85284	7.24004e-12	1.82094e-10	1979.59	2001.22	2926.29	5138.56	5055.77	5719.85
Q9NQ48	LZTFL1	Leucine zipper transcription factor-like protein 1 OS=Homo sapiens OX=9606 GN=LZTFL1 PE=1 SV=1	824.478	1.20084	2.29873	0.256344	4.68448	2.80676e-06	3.44038e-05	512.141	495.247	492.172	770.631	1212.97	1463.7
A0A3B3IT47	WDR37	WD repeat-containing protein 37 OS=Homo sapiens OX=9606 GN=WDR37 PE=1 SV=1	117.683	1.19823	2.29459	0.468621	2.55694	0.0105598	0.047595	72.7581	74.1907	67.3394	75.4321	194.572	221.805
E9PEJ6	ATP11A	Phospholipid-transporting ATPase OS=Homo sapiens OX=9606 GN=ATP11A PE=1 SV=1	462.562	1.17969	2.26528	0.458168	2.5748	0.0100299	0.0459445	179.533	173.433	497.123	642.193	635.464	647.629
Q9Y2Q3	GSTK1	Glutathione S-transferase kappa 1 OS=Homo sapiens OX=9606 GN=GSTK1 PE=1 SV=3	1607.2	1.1566	2.22931	0.281121	4.11423	3.88477e-05	0.000388623	1055.46	942.318	988.304	1343.51	2616.37	2697.23
Q8TBC4	UBA3	NEDD8-activating enzyme E1 catalytic subunit OS=Homo sapiens OX=9606 GN=UBA3 PE=1 SV=2	1475.19	1.14558	2.21235	0.405783	2.82314	0.00475558	0.024982	926.957	916.303	912.052	900.089	2294.5	2901.25
Q9GZX9	TWSG1	Twisted gastrulation protein homolog 1 OS=Homo sapiens OX=9606 GN=TWSG1 PE=1 SV=1	185.993	1.13256	2.19247	0.153236	7.39096	1.45774e-13	4.31815e-12	111.499	128.148	109.922	272.167	251.495	242.73
M0QXA7	WIZ	Protein Wiz OS=Homo sapiens OX=9606 GN=WIZ PE=1 SV=1	750.525	1.12168	2.176	0.262576	4.27183	1.93874e-05	0.000207995	384.578	369.99	663.491	1012.22	1031.85	1041.02
P51798	CLCN7	H(+)/Cl(-) exchange transporter 7 OS=Homo sapiens OX=9606 GN=CLCN7 PE=1 SV=2	176.199	1.12068	2.17449	0.359856	3.11424	0.00184419	0.0115549	118.114	68.4096	146.562	231.393	293.928	198.787
P07339	CTSD	Cathepsin D OS=Homo sapiens OX=9606 GN=CTSD PE=1 SV=1	6906.13	1.10436	2.15003	0.188537	5.85752	4.69825e-09	8.52077e-08	3172.06	4613.31	5369.32	9567.65	9481.25	9233.15
A0A3B3ISS6	GPNMB	Transmembrane glycoprotein NMB OS=Homo sapiens OX=9606 GN=GPNMB PE=1 SV=1	161.888	1.09895	2.14199	0.165196	6.6524	2.88359e-11	6.71411e-10	95.4359	111.768	101.999	226.296	233.901	201.926
Q00535	CDK5	Cyclin-dependent-like kinase 5 OS=Homo sapiens OX=9606 GN=CDK5 PE=1 SV=3	430.136	1.09572	2.1372	0.219502	4.99186	5.98005e-07	8.09279e-06	197.486	303.507	321.843	581.031	582.682	594.27
Q00688	FKBP3	Peptidyl-prolyl cis-trans isomerase FKBP3 OS=Homo sapiens OX=9606 GN=FKBP3 PE=1 SV=1	1760.12	1.0897	2.1283	0.069041	15.7834	4.04752e-56	1.02769e-53	1143.34	1131.17	1101.2	2472.95	2230.34	2481.7
P17050	NAGA	Alpha-N-acetylgalactosaminidase OS=Homo sapiens OX=9606 GN=NAGA PE=1 SV=2	476.86	1.08705	2.1244	0.391156	2.77908	0.00545127	0.0278412	307.096	299.653	308.969	314.98	825.897	804.566
Q9Y5J1	UTP18	U3 small nucleolar RNA-associated protein 18 homolog OS=Homo sapiens OX=9606 GN=UTP18 PE=1 SV=3	909.272	1.07645	2.10884	0.407483	2.64171	0.00824894	0.0395534	608.522	550.167	596.151	562.683	1401.33	1736.77
Q5JWF2-2	GNAS	Isoform XLas-2 of Guanine nucleotide-binding protein G(s) subunit alpha isoforms XLas OS=Homo sapiens OX=9606 GN=GNAS	1980.71	1.07619	2.10846	0.253105	4.25194	2.11925e-05	0.000225096	857.033	1338.32	1628.03	2307.82	2899.95	2853.12
A0A1C7CYX9	DPYSL2	Dihydropyrimidinase-related protein 2 OS=Homo sapiens OX=9606 GN=DPYSL2 PE=1 SV=1	1073.64	1.073	2.10381	0.114411	9.37851	6.69118e-21	3.30346e-19	703.958	722.637	648.637	1279.29	1550.37	1536.94
Q9UBR2	CTSZ	Cathepsin Z OS=Homo sapiens OX=9606 GN=CTSZ PE=1 SV=1	1226.32	1.07071	2.10046	0.0642985	16.6521	2.92049e-62	8.19581e-60	815.457	792.01	765.49	1693.15	1699.4	1592.39
Q8TDW0	LRRC8C	Volume-regulated anion channel subunit LRRC8C OS=Homo sapiens OX=9606 GN=LRRC8C PE=1 SV=2	170.239	1.0662	2.09391	0.165153	6.45582	1.07637e-10	2.39133e-09	106.775	125.257	98.0382	233.432	221.481	236.452
Q13884	SNTB1	Beta-1-syntrophin OS=Homo sapiens OX=9606 GN=SNTB1 PE=1 SV=3	134.915	1.06544	2.09281	0.16062	6.63331	3.28249e-11	7.57672e-10	90.7114	82.8623	88.1353	181.445	178.013	188.325
Q6ZRQ5	MMS22L	Protein MMS22-like OS=Homo sapiens OX=9606 GN=MMS22L PE=1 SV=3	711.937	1.04806	2.06774	0.101685	10.3068	6.56279e-25	4.1168e-23	439.383	436.473	516.929	957.173	986.315	935.347
P08670	VIM	Vimentin OS=Homo sapiens OX=9606 GN=VIM PE=1 SV=4	7009.99	1.02582	2.03611	0.0440797	23.2719	8.54412e-120	5.69466e-117	4566.75	4533.34	4753.37	8995.79	9641.67	9569
P07919	UQCRH	Cytochrome b-c1 complex subunit 6, mitochondrial OS=Homo sapiens OX=9606 GN=UQCRH PE=1 SV=2	1280.91	1.0219	2.0306	0.0710082	14.3913	5.86595e-47	1.07853e-44	890.105	827.66	817.975	1801.2	1679.74	1668.77
Q9ULW3	ABT1	Activator of basal transcription 1 OS=Homo sapiens OX=9606 GN=ABT1 PE=1 SV=1	297.568	1.01545	2.02154	0.111002	9.14807	5.79596e-20	2.6621e-18	205.99	193.667	191.125	403.664	383.97	406.991
Q9P270	SLAIN2	SLAIN motif-containing protein 2 OS=Homo sapiens OX=9606 GN=SLAIN2 PE=1 SV=2	568.724	1.00879	2.01222	0.0797156	12.6549	1.05164e-36	1.33509e-34	378.909	382.516	371.357	755.341	782.429	741.791
P48595	SERPINB10	Serpin B10 OS=Homo sapiens OX=9606 GN=SERPINB10 PE=1 SV=1	4462.42	1.00462	2.00642	0.0351711	28.5639	1.88994e-179	3.35905e-176	2967.02	2899.22	3040.17	6058.02	5944.8	5865.28
Q14197	MRPL58	Peptidyl-tRNA hydrolase ICT1, mitochondrial OS=Homo sapiens OX=9606 GN=MRPL58 PE=1 SV=1	975.621	1.00318	2.00441	0.0748946	13.3945	6.50845e-41	9.37921e-39	600.963	677.351	670.423	1312.93	1296.8	1295.26
Q9UJA5	TRMT6	tRNA (adenine(58)-N(1))-methyltransferase non-catalytic subunit TRM6 OS=Homo sapiens OX=9606 GN=TRMT6 PE=1 SV=1	853.713	1.00291	2.00403	0.0667232	15.0308	4.61127e-51	9.83491e-49	579.23	581.963	543.666	1137.6	1146.73	1133.09
P38432	COIL	Coilin OS=Homo sapiens OX=9606 GN=COIL PE=1 SV=1	1383.65	0.999229	1.99893	0.265551	3.76285	0.000167987	0.00141502	762.542	690.841	1315.1	1855.22	1859.82	1818.38
Q96KR1	ZFR	Zinc finger RNA-binding protein OS=Homo sapiens OX=9606 GN=ZFR PE=1 SV=2	1337.36	0.996466	1.99511	0.144243	6.90827	4.90605e-12	1.23977e-10	893.885	905.705	879.373	1505.58	1739.77	2099.82
Q96AH8	RAB7B	Ras-related protein Rab-7b OS=Homo sapiens OX=9606 GN=RAB7B PE=2 SV=1	608.857	0.995073	1.99318	0.223051	4.46118	8.15086e-06	9.34632e-05	405.366	389.26	425.822	588.167	864.19	980.336
P02042	HBD	Hemoglobin subunit delta OS=Homo sapiens OX=9606 GN=HBD PE=1 SV=2	654.153	0.994596	1.99252	0.0722679	13.7626	4.27779e-43	6.70859e-41	445.053	427.801	438.696	872.566	877.645	863.156
A6NHB5	ZMYM3	Zinc finger MYM-type protein 3 OS=Homo sapiens OX=9606 GN=ZMYM3 PE=1 SV=1	958.263	0.994391	1.99224	0.175339	5.67124	1.41768e-08	2.38457e-07	601.908	583.89	735.782	1072.36	1263.68	1491.95
P50452	SERPINB8	Serpin B8 OS=Homo sapiens OX=9606 GN=SERPINB8 PE=1 SV=2	2900.93	0.987071	1.98216	0.0760083	12.9864	1.46228e-38	1.90167e-36	1981.48	2013.75	1840.94	3705.35	3701.01	4163.03
P16070	CD44	CD44 antigen OS=Homo sapiens OX=9606 GN=CD44 PE=1 SV=3	1582.75	0.98648	1.98134	0.154324	6.39225	1.63466e-10	3.54309e-09	845.694	1219.81	1120.01	2124.33	2150.64	2036
O75506	HSBP1	Heat shock factor-binding protein 1 OS=Homo sapiens OX=9606 GN=HSBP1 PE=1 SV=1	741.18	0.974606	1.9651	0.0709941	13.728	6.90224e-43	1.0223e-40	496.078	518.371	485.24	970.424	999.77	977.197
P07355-2	ANXA2	Isoform 2 of Annexin A2 OS=Homo sapiens OX=9606 GN=ANXA2	1049.79	0.973715	1.96389	0.0776434	12.5409	4.46138e-36	5.06129e-34	749.314	667.716	708.054	1432.19	1411.68	1329.78
Q16658	FSCN1	Fascin OS=Homo sapiens OX=9606 GN=FSCN1 PE=1 SV=3	1751.76	0.972211	1.96185	0.044975	21.6167	1.25139e-103	6.06585e-101	1174.52	1195.72	1178.44	2340.44	2287.26	2334.18
Q14191	WRN	Werner syndrome ATP-dependent helicase OS=Homo sapiens OX=9606 GN=WRN PE=1 SV=2	144.853	0.971432	1.96079	0.152372	6.3754	1.82487e-10	3.93935e-09	102.05	95.388	96.0576	192.658	188.362	194.602
Q8N4C6-7	NIN	Isoform 7 of Ninein OS=Homo sapiens OX=9606 GN=NIN	235.163	0.956715	1.94088	0.276789	3.45648	0.000547286	0.00399743	104.885	188.849	186.174	309.883	313.592	307.597
Q8WVJ2	NUDCD2	NudC domain-containing protein 2 OS=Homo sapiens OX=9606 GN=NUDCD2 PE=1 SV=1	1145.46	0.953318	1.93632	0.161984	5.88527	3.97397e-09	7.38299e-08	705.848	674.461	960.576	1539.22	1499.65	1493
Q6NZY4	ZCCHC8	Zinc finger CCHC domain-containing protein 8 OS=Homo sapiens OX=9606 GN=ZCCHC8 PE=1 SV=2	510.161	0.949973	1.93184	0.0991242	9.58367	9.36605e-22	4.89606e-20	351.506	348.793	343.629	653.405	637.534	726.097
A0A087WSV8	NUCB2	Nucleobindin 2, isoform CRA_b OS=Homo sapiens OX=9606 GN=NUCB2 PE=1 SV=1	2360.45	0.947492	1.92852	0.319857	2.96223	0.00305417	0.0173427	1212.32	1193.8	2430.16	2521.88	3188.71	3615.84
O15164	TRIM24	Transcription intermediary factor 1-alpha OS=Homo sapiens OX=9606 GN=TRIM24 PE=1 SV=3	381.458	0.94449	1.92451	0.363164	2.60073	0.00930268	0.0435486	265.52	244.733	272.328	269.109	635.464	601.594
A0A0A0MTC1	RNF213	E3 ubiquitin-protein ligase RNF213 OS=Homo sapiens OX=9606 GN=RNF213 PE=1 SV=1	485.806	0.942356	1.92166	0.261363	3.60555	0.000311494	0.00243175	232.448	398.895	366.405	531.083	696.527	689.479
Q14669-3	TRIP12	Isoform 3 of E3 ubiquitin-protein ligase TRIP12 OS=Homo sapiens OX=9606 GN=TRIP12	1147.24	0.941477	1.92049	0.182982	5.1452	2.67237e-07	3.75966e-06	774.826	799.718	782.325	1201.82	1458.26	1866.51
P51398	DAP3	28S ribosomal protein S29, mitochondrial OS=Homo sapiens OX=9606 GN=DAP3 PE=1 SV=1	611.668	0.935007	1.9119	0.156187	5.98647	2.14441e-09	4.08357e-08	430.879	409.494	419.881	719.663	730.681	959.411
Q9Y3L3	SH3BP1	SH3 domain-binding protein 1 OS=Homo sapiens OX=9606 GN=SH3BP1 PE=1 SV=3	1168.41	0.921454	1.89402	0.326893	2.81882	0.00481999	0.0252706	567.891	610.869	1243.8	1540.24	1542.09	1505.55
Q9P2I0	CPSF2	Cleavage and polyadenylation specificity factor subunit 2 OS=Homo sapiens OX=9606 GN=CPSF2 PE=1 SV=2	2816.97	0.918826	1.89058	0.215074	4.27214	1.93606e-05	0.000207995	1623.36	1621.6	2602.47	3472.94	3519.89	4061.54
Q9Y265	RUVBL1	RuvB-like 1 OS=Homo sapiens OX=9606 GN=RUVBL1 PE=1 SV=1	2852.86	0.915311	1.88598	0.258341	3.54303	0.000395559	0.00298742	1567.61	1584.98	2778.74	3199.75	3830.38	4155.7
P05362	ICAM1	Intercellular adhesion molecule 1 OS=Homo sapiens OX=9606 GN=ICAM1 PE=1 SV=2	229.315	0.900414	1.8666	0.124832	7.21301	5.4727e-13	1.50415e-11	161.58	160.907	157.455	305.806	282.544	307.597
Q01432-4	AMPD3	Isoform 2 of AMP deaminase 3 OS=Homo sapiens OX=9606 GN=AMPD3	1066.44	0.897405	1.86271	0.205729	4.36206	1.28841e-05	0.000142527	543.323	870.055	821.936	1344.53	1324.75	1494.04
A8MVU1	NCF1C	Putative neutrophil cytosol factor 1C OS=Homo sapiens OX=9606 GN=NCF1C PE=5 SV=1	330.345	0.897258	1.86252	0.0995959	9.00899	2.07971e-19	8.80081e-18	234.338	231.244	226.775	428.128	431.578	430.009
Q9BXW7	HDHD5	Haloacid dehalogenase-like hydrolase domain-containing 5 OS=Homo sapiens OX=9606 GN=HDHD5 PE=1 SV=1	1084.49	0.893256	1.85736	0.118508	7.53751	4.79031e-14	1.43494e-12	720.966	681.206	875.412	1419.96	1416.86	1392.56
Q92889	ERCC4	DNA repair endonuclease XPF OS=Homo sapiens OX=9606 GN=ERCC4 PE=1 SV=3	500.208	0.873211	1.83174	0.334832	2.60791	0.00910982	0.0427961	251.346	410.458	398.094	416.916	762.764	761.67
P38935	IGHMBP2	DNA-binding protein SMUBP-2 OS=Homo sapiens OX=9606 GN=IGHMBP2 PE=1 SV=3	505.566	0.862485	1.81817	0.236871	3.64116	0.000271415	0.00214398	300.481	295.799	480.288	681.947	620.975	653.906
Q13510-2	ASAH1	Isoform 2 of Acid ceramidase OS=Homo sapiens OX=9606 GN=ASAH1	838.779	0.85948	1.81438	0.124385	6.90984	4.85196e-12	1.23194e-10	628.365	525.116	634.773	1058.09	1180.89	1005.45
P21281	ATP6V1B2	V-type proton ATPase subunit B, brain isoform OS=Homo sapiens OX=9606 GN=ATP6V1B2 PE=1 SV=3	2027.29	0.850528	1.80316	0.092982	9.14723	5.84145e-20	2.6621e-18	1465.56	1509.83	1363.62	2349.61	2770.58	2704.56
Q7Z417	NUFIP2	Nuclear fragile X mental retardation-interacting protein 2 OS=Homo sapiens OX=9606 GN=NUFIP2 PE=1 SV=1	940.042	0.850173	1.80272	0.144591	5.87985	4.10648e-09	7.54907e-08	668.051	659.045	685.277	1124.35	1068.08	1435.45
Q9UBB9	TFIP11	Tuftelin-interacting protein 11 OS=Homo sapiens OX=9606 GN=TFIP11 PE=1 SV=1	549.887	0.848246	1.80031	0.219068	3.87207	0.000107914	0.000955809	418.595	318.924	440.677	559.625	817.617	743.884
R4GMX8	RANBP10	Ran-binding protein 10 OS=Homo sapiens OX=9606 GN=RANBP10 PE=1 SV=1	241.499	0.842523	1.79318	0.118034	7.13796	9.47251e-13	2.55088e-11	172.919	169.579	176.271	300.709	317.732	311.782
Q9UHQ9	CYB5R1	NADH-cytochrome b5 reductase 1 OS=Homo sapiens OX=9606 GN=CYB5R1 PE=1 SV=1	1322.31	0.842423	1.79306	0.278095	3.02927	0.00245147	0.0144914	959.084	930.756	950.673	1037.7	2074.06	1981.6
Q6UWZ7	ABRAXAS1	BRCA1-A complex subunit Abraxas 1 OS=Homo sapiens OX=9606 GN=ABRAXAS1 PE=1 SV=2	467.371	0.841823	1.79231	0.0845765	9.95339	2.43726e-23	1.42807e-21	341.112	336.267	326.794	603.457	604.416	592.177
P04004	VTN	Vitronectin OS=Homo sapiens OX=9606 GN=VTN PE=1 SV=1	795.658	0.84152	1.79194	0.0723439	11.6322	2.82623e-31	2.59819e-29	586.789	569.438	553.569	1060.13	1013.22	990.798
Q8IYJ3	SYTL1	Synaptotagmin-like protein 1 OS=Homo sapiens OX=9606 GN=SYTL1 PE=1 SV=1	2369.69	0.841416	1.79181	0.227713	3.69507	0.000219823	0.00178131	1694.22	1680.37	1718.14	2042.78	3499.19	3583.41
Q92636-2	NSMAF	Isoform 2 of Protein FAN OS=Homo sapiens OX=9606 GN=NSMAF	300.87	0.833709	1.78226	0.195983	4.25398	2.10004e-05	0.000223683	194.651	184.031	270.348	391.432	388.109	376.65
Q3SXM5	HSDL1	Inactive hydroxysteroid dehydrogenase-like protein 1 OS=Homo sapiens OX=9606 GN=HSDL1 PE=1 SV=3	912.83	0.829992	1.77768	0.0662065	12.5364	4.7187e-36	5.24168e-34	678.445	648.446	644.675	1148.81	1205.73	1150.87
O14524	NEMP1	Nuclear envelope integral membrane protein 1 OS=Homo sapiens OX=9606 GN=NEMP1 PE=1 SV=2	527.379	0.827994	1.77522	0.0880519	9.40348	5.27877e-21	2.63051e-19	384.578	396.968	358.483	674.812	692.387	657.045
Q562E7	WDR81	WD repeat-containing protein 81 OS=Homo sapiens OX=9606 GN=WDR81 PE=1 SV=2	315.803	0.82428	1.77065	0.105315	7.82678	5.00526e-15	1.57918e-13	229.613	220.645	233.707	417.935	396.389	396.529
Q9BQ70	TCF25	Transcription factor 25 OS=Homo sapiens OX=9606 GN=TCF25 PE=1 SV=1	220.365	0.819816	1.76518	0.131528	6.23302	4.57541e-10	9.56709e-09	161.58	151.272	165.378	298.671	270.124	275.164
P49116-2	NR2C2	Isoform 2 of Nuclear receptor subfamily 2 group C member 2 OS=Homo sapiens OX=9606 GN=NR2C2	337.466	0.817226	1.76201	0.107169	7.62557	2.42951e-14	7.31874e-13	240.007	252.441	240.639	422.012	455.382	414.315
Q8NE01	CNNM3	Metal transporter CNNM3 OS=Homo sapiens OX=9606 GN=CNNM3 PE=1 SV=1	388.57	0.808966	1.75196	0.298139	2.71338	0.00666005	0.0329725	253.236	256.295	337.687	325.174	595.101	563.929
Q9H3N1	TMX1	Thioredoxin-related transmembrane protein 1 OS=Homo sapiens OX=9606 GN=TMX1 PE=1 SV=1	3320.78	0.807885	1.75064	0.234976	3.43816	0.00058569	0.00423157	2192.19	2495.51	2555.93	2862.34	4443.08	5375.63
P17612	PRKACA	cAMP-dependent protein kinase catalytic subunit alpha OS=Homo sapiens OX=9606 GN=PRKACA PE=1 SV=2	1690.09	0.805983	1.74834	0.269781	2.98754	0.00281229	0.0162461	1019.56	1377.83	1292.32	1404.67	2386.61	2659.57
A0A087X0R6	SNX12	Sorting nexin-12 OS=Homo sapiens OX=9606 GN=SNX12 PE=1 SV=1	1279.69	0.803881	1.74579	0.248196	3.2389	0.00119992	0.00796761	943.02	947.136	906.111	1073.38	1999.54	1808.97
P13473-2	LAMP2	Isoform LAMP-2B of Lysosome-associated membrane glycoprotein 2 OS=Homo sapiens OX=9606 GN=LAMP2	1341.91	0.803024	1.74475	0.243987	3.29125	0.000997415	0.00678344	873.097	978.932	1081.39	1156.97	2015.06	1946.02
Q4KMQ2-2	ANO6	Isoform 2 of Anoctamin-6 OS=Homo sapiens OX=9606 GN=ANO6	719.215	0.796429	1.7368	0.30604	2.60237	0.00925817	0.0433783	410.091	419.129	747.665	794.076	826.932	1117.39
P63313	TMSB10	Thymosin beta-10 OS=Homo sapiens OX=9606 GN=TMSB10 PE=1 SV=2	4489.52	0.796295	1.73664	0.138544	5.74758	9.05275e-09	1.56718e-07	2750.63	3627.64	3465.01	5064.15	5763.68	6265.99
P54132	BLM	Bloom syndrome protein OS=Homo sapiens OX=9606 GN=BLM PE=1 SV=1	1624.82	0.795377	1.73553	0.194601	4.08721	4.36593e-05	0.000431095	889.16	1206.32	1468.59	2079.48	2023.34	2082.04
P24071-6	FCAR	Isoform U02 of Immunoglobulin alpha Fc receptor OS=Homo sapiens OX=9606 GN=FCAR	207.672	0.794501	1.73448	0.139017	5.71512	1.09628e-08	1.87351e-07	149.296	166.688	139.63	270.129	259.775	260.516
Q00653	NFKB2	Nuclear factor NF-kappa-B p100 subunit OS=Homo sapiens OX=9606 GN=NFKB2 PE=1 SV=4	1353.78	0.792419	1.73198	0.162641	4.87219	1.10368e-06	1.4459e-05	840.025	912.449	1221.02	1734.94	1694.23	1720.03
Q5RKV6	EXOSC6	Exosome complex component MTR3 OS=Homo sapiens OX=9606 GN=EXOSC6 PE=1 SV=1	1097.21	0.79123	1.73055	0.26869	2.94477	0.00323199	0.0182552	621.751	642.665	1146.75	1373.07	1407.54	1391.51
Q96JJ7	TMX3	Protein disulfide-isomerase TMX3 OS=Homo sapiens OX=9606 GN=TMX3 PE=1 SV=2	2111.84	0.789606	1.7286	0.248661	3.17543	0.00149615	0.00963465	1012	1653.39	1978.59	2765.51	2690.89	2570.64
Q15121-2	PEA15	Isoform 2 of Astrocytic phosphoprotein PEA-15 OS=Homo sapiens OX=9606 GN=PEA15	615.953	0.789127	1.72803	0.0810061	9.74157	2.00424e-22	1.10121e-20	467.73	440.327	446.618	799.173	794.848	747.022
Q9BQ52	ELAC2	Zinc phosphodiesterase ELAC protein 2 OS=Homo sapiens OX=9606 GN=ELAC2 PE=1 SV=2	487.894	0.788171	1.72688	0.0915488	8.6093	7.35078e-18	2.90329e-16	369.46	365.172	338.677	622.825	594.066	637.166
Q14118	DAG1	Dystroglycan OS=Homo sapiens OX=9606 GN=DAG1 PE=1 SV=2	293.194	0.787887	1.72654	0.113294	6.95437	3.54138e-12	9.16633e-11	222.999	201.375	220.834	367.987	383.97	362.002
Q8IZ07	ANKRD13A	Ankyrin repeat domain-containing protein 13A OS=Homo sapiens OX=9606 GN=ANKRD13A PE=1 SV=3	1006.26	0.783726	1.72157	0.10713	7.31564	2.56153e-13	7.38275e-12	733.25	763.104	721.918	1122.31	1364.08	1332.92
P53004	BLVRA	Biliverdin reductase A OS=Homo sapiens OX=9606 GN=BLVRA PE=1 SV=2	822.792	0.774634	1.71076	0.072691	10.6565	1.62544e-26	1.14037e-24	613.247	613.759	594.171	1083.57	1038.06	993.937
P48426-2	PIP4K2A	Isoform 2 of Phosphatidylinositol 5-phosphate 4-kinase type-2 alpha OS=Homo sapiens OX=9606 GN=PIP4K2A	1178.83	0.772275	1.70796	0.0589459	13.1014	3.23159e-39	4.41816e-37	894.83	861.383	855.606	1531.07	1477.92	1452.19
Q9UIQ6	LNPEP	Leucyl-cystinyl aminopeptidase OS=Homo sapiens OX=9606 GN=LNPEP PE=1 SV=3	1262.99	0.771678	1.70725	0.29697	2.5985	0.00936318	0.0436403	714.352	698.549	1386.4	1630.97	1579.35	1568.33
Q8NEJ9	NGDN	Neuroguidin OS=Homo sapiens OX=9606 GN=NGDN PE=1 SV=1	644.275	0.771429	1.70696	0.0853425	9.03921	1.57804e-19	6.89681e-18	480.959	443.217	504.055	825.676	815.547	796.196
P08571	CD14	Monocyte differentiation antigen CD14 OS=Homo sapiens OX=9606 GN=CD14 PE=1 SV=2	208.152	0.77002	1.70529	0.127262	6.05067	1.44244e-09	2.78662e-08	154.965	152.235	154.484	269.109	267.019	251.1
Q15813-2	TBCE	Isoform 2 of Tubulin-specific chaperone E OS=Homo sapiens OX=9606 GN=TBCE	645.388	0.761844	1.69566	0.0915529	8.32135	8.69642e-17	3.22009e-15	474.345	479.831	482.269	748.205	855.911	831.769
Q99571-2	P2RX4	Isoform 2 of P2X purinoceptor 4 OS=Homo sapiens OX=9606 GN=P2RX4	529.551	0.76105	1.69472	0.0827882	9.19274	3.82977e-20	1.77568e-18	405.366	382.516	391.162	673.793	678.933	645.536
P54619-3	PRKAG1	Isoform 3 of 5'-AMP-activated protein kinase subunit gamma-1 OS=Homo sapiens OX=9606 GN=PRKAG1	1265.16	0.757325	1.69035	0.24763	3.0583	0.00222596	0.0134263	768.212	761.177	1292.32	1420.98	1703.54	1644.7
O43324	EEF1E1	Eukaryotic translation elongation factor 1 epsilon-1 OS=Homo sapiens OX=9606 GN=EEF1E1 PE=1 SV=1	2100.82	0.75605	1.68886	0.188536	4.0101	6.06928e-05	0.000581751	1562.88	1584.98	1539.89	1951.04	3125.57	2840.57
P52790	HK3	Hexokinase-3 OS=Homo sapiens OX=9606 GN=HK3 PE=1 SV=2	89.9145	0.754978	1.68761	0.200786	3.76011	0.000169839	0.00142732	72.7581	64.5555	63.3782	121.303	107.636	109.856
Q96NC0	ZMAT2	Zinc finger matrin-type protein 2 OS=Homo sapiens OX=9606 GN=ZMAT2 PE=1 SV=1	1178.09	0.753096	1.68541	0.0597784	12.5981	2.16206e-36	2.5618e-34	845.694	872.945	914.033	1496.41	1483.1	1456.38
P04003	C4BPA	C4b-binding protein alpha chain OS=Homo sapiens OX=9606 GN=C4BPA PE=1 SV=2	326.05	0.742022	1.67252	0.103067	7.19941	6.04757e-13	1.64519e-11	241.897	252.441	237.668	420.993	403.634	399.667
P00747	PLG	Plasminogen OS=Homo sapiens OX=9606 GN=PLG PE=1 SV=2	282.115	0.741453	1.67186	0.107042	6.92673	4.30675e-12	1.09874e-10	214.495	210.046	208.95	356.774	347.746	354.679
Q92686	NRGN	Neurogranin OS=Homo sapiens OX=9606 GN=NRGN PE=1 SV=1	180.548	0.74102	1.67136	0.140703	5.26656	1.39003e-07	2.03058e-06	136.067	140.673	128.737	225.277	237.005	215.527
Q9NZD8	SPG21	Maspardin OS=Homo sapiens OX=9606 GN=SPG21 PE=1 SV=1	1250.53	0.739643	1.66976	0.288972	2.55956	0.0104803	0.0472966	730.415	728.418	1351.74	1342.49	1725.28	1624.83
P11169	SLC2A3	Solute carrier family 2, facilitated glucose transporter member 3 OS=Homo sapiens OX=9606 GN=SLC2A3 PE=1 SV=1	282.581	0.734996	1.66439	0.108811	6.75479	1.43039e-11	3.43552e-10	212.605	219.682	203.999	355.754	349.816	353.632
P25787	PSMA2	Proteasome subunit alpha type-2 OS=Homo sapiens OX=9606 GN=PSMA2 PE=1 SV=2	3380.03	0.73374	1.66294	0.0350648	20.9253	3.15371e-97	1.29351e-94	2554.09	2561.99	2499.48	4284.34	4235.05	4145.24
Q99766	DMAC2L	ATP synthase subunit s, mitochondrial OS=Homo sapiens OX=9606 GN=DMAC2L PE=1 SV=3	883.329	0.733581	1.66276	0.0622826	11.7783	5.05309e-32	4.72685e-30	676.555	652.3	661.51	1121.29	1094.99	1093.33
Q5H9R7-5	PPP6R3	Isoform 5 of Serine/threonine-protein phosphatase 6 regulatory subunit 3 OS=Homo sapiens OX=9606 GN=PPP6R3	1171.11	0.733461	1.66262	0.194912	3.76304	0.000167857	0.00141502	904.279	904.741	829.859	1087.65	1605.22	1694.92
P30419	NMT1	Glycylpeptide N-tetradecanoyltransferase 1 OS=Homo sapiens OX=9606 GN=NMT1 PE=1 SV=2	1746.02	0.730768	1.65952	0.246602	2.96334	0.00304317	0.0172987	1341.77	1328.69	1268.55	1435.25	2364.88	2736.99
Q13153	PAK1	Serine/threonine-protein kinase PAK 1 OS=Homo sapiens OX=9606 GN=PAK1 PE=1 SV=2	511.723	0.730013	1.65865	0.130421	5.59737	2.17629e-08	3.55893e-07	390.248	394.078	370.367	585.109	602.346	728.19
P04083	ANXA1	Annexin A1 OS=Homo sapiens OX=9606 GN=ANXA1 PE=1 SV=2	2915.68	0.727664	1.65596	0.0580213	12.5413	4.43532e-36	5.06129e-34	2076.91	2300.88	2209.33	3659.48	3726.89	3520.63
Q9NWK9	ZNHIT6	Box C/D snoRNA protein 1 OS=Homo sapiens OX=9606 GN=ZNHIT6 PE=1 SV=1	1930.37	0.727467	1.65573	0.0896092	8.11822	4.73079e-16	1.65951e-14	1448.55	1533.92	1378.48	2193.65	2455.96	2571.68
P51159	RAB27A	Ras-related protein Rab-27A OS=Homo sapiens OX=9606 GN=RAB27A PE=1 SV=3	857.609	0.726552	1.65468	0.0823023	8.82785	1.06708e-18	4.34326e-17	618.916	700.476	618.928	1087.65	1056.69	1062.99
Q13642-4	FHL1	Isoform 4 of Four and a half LIM domains protein 1 OS=Homo sapiens OX=9606 GN=FHL1	177.569	0.726231	1.65431	0.157185	4.62023	3.83316e-06	4.65567e-05	143.626	134.892	122.795	232.413	229.761	201.926
D6RFG8	DCK	Deoxycytidine kinase OS=Homo sapiens OX=9606 GN=DCK PE=1 SV=1	1677.84	0.717931	1.64482	0.0464887	15.4431	8.39371e-54	1.94588e-51	1286.97	1242.94	1276.48	2116.18	2082.34	2062.16
Q9UKU7	ACAD8	Isobutyryl-CoA dehydrogenase, mitochondrial OS=Homo sapiens OX=9606 GN=ACAD8 PE=1 SV=1	427.326	0.715424	1.64197	0.0883114	8.10115	5.44407e-16	1.87276e-14	332.608	320.851	316.891	530.064	524.724	538.819
Q8IY17	PNPLA6	Neuropathy target esterase OS=Homo sapiens OX=9606 GN=PNPLA6 PE=1 SV=3	286.085	0.714437	1.64084	0.108851	6.56345	5.25764e-11	1.20835e-09	213.55	225.463	210.931	354.735	348.781	363.049
P50148	GNAQ	Guanine nucleotide-binding protein G(q) subunit alpha OS=Homo sapiens OX=9606 GN=GNAQ PE=1 SV=4	1276	0.714367	1.64076	0.124055	5.75847	8.48794e-09	1.47901e-07	894.83	920.157	1084.36	1420.98	1705.61	1630.06
Q9NX20	MRPL16	39S ribosomal protein L16, mitochondrial OS=Homo sapiens OX=9606 GN=MRPL16 PE=1 SV=1	1184.61	0.712626	1.63878	0.0585437	12.1726	4.35267e-34	4.46316e-32	906.169	895.106	892.247	1472.97	1519.32	1421.85
Q9H074	PAIP1	Polyadenylate-binding protein-interacting protein 1 OS=Homo sapiens OX=9606 GN=PAIP1 PE=1 SV=1	1388.43	0.712136	1.63823	0.0749272	9.50437	2.01264e-21	1.03186e-19	1034.68	1080.1	1042.77	1607.52	1830.84	1734.68
P16152	CBR1	Carbonyl reductase [NADPH] 1 OS=Homo sapiens OX=9606 GN=CBR1 PE=1 SV=3	1396.58	0.708854	1.63451	0.0758622	9.34397	9.27856e-21	4.49757e-19	1068.69	1124.42	987.314	1753.29	1782.2	1663.54
P27918	CFP	Properdin OS=Homo sapiens OX=9606 GN=CFP PE=1 SV=2	182.571	0.705692	1.63093	0.139219	5.06894	4.00036e-07	5.58375e-06	133.232	145.491	137.65	226.296	216.306	236.452
P29966	MARCKS	Myristoylated alanine-rich C-kinase substrate OS=Homo sapiens OX=9606 GN=MARCKS PE=1 SV=4	1054.93	0.704258	1.62931	0.0838308	8.40095	4.42881e-17	1.66299e-15	740.809	811.28	855.606	1323.12	1255.4	1343.38
P04080	CSTB	Cystatin-B OS=Homo sapiens OX=9606 GN=CSTB PE=1 SV=2	1043.86	0.703122	1.62802	0.0718243	9.78948	1.24942e-22	7.01252e-21	822.072	765.995	795.199	1351.66	1294.73	1233.53
Q13422	IKZF1	DNA-binding protein Ikaros OS=Homo sapiens OX=9606 GN=IKZF1 PE=1 SV=1	4301.01	0.700891	1.62551	0.0330789	21.1884	1.22071e-99	5.42402e-97	3305.29	3250.9	3272.89	5454.56	5248.27	5274.14
P19623	SRM	Spermidine synthase OS=Homo sapiens OX=9606 GN=SRM PE=1 SV=1	1924.72	0.697634	1.62184	0.181864	3.83603	0.00012504	0.00109297	1212.32	1320.98	1871.64	2393.44	2400.07	2349.88
O95071	UBR5	E3 ubiquitin-protein ligase UBR5 OS=Homo sapiens OX=9606 GN=UBR5 PE=1 SV=2	833.303	0.694325	1.61813	0.144091	4.81865	1.44536e-06	1.85451e-05	658.602	633.993	616.947	852.179	1135.35	1102.75
Q8NFH4	NUP37	Nucleoporin Nup37 OS=Homo sapiens OX=9606 GN=NUP37 PE=1 SV=1	2225.85	0.693051	1.6167	0.231124	2.99861	0.00271214	0.0157529	1134.84	2029.16	1939.97	2799.14	2684.68	2767.33
Q15942	ZYX	Zyxin OS=Homo sapiens OX=9606 GN=ZYX PE=1 SV=1	2297.24	0.691499	1.61496	0.240325	2.87735	0.0040103	0.0216865	1260.51	2034.94	1975.62	2218.11	3164.9	3129.33
O00468	AGRN	Agrin OS=Homo sapiens OX=9606 GN=AGRN PE=1 SV=6	612.261	0.689322	1.61253	0.0775495	8.8888	6.17747e-19	2.55336e-17	468.675	479.831	457.512	755.341	732.751	779.456
Q68CP9	ARID2	AT-rich interactive domain-containing protein 2 OS=Homo sapiens OX=9606 GN=ARID2 PE=1 SV=2	839.471	0.688214	1.61129	0.0665034	10.3485	4.249e-25	2.7296e-23	647.263	631.103	650.617	1052.99	1053.59	1001.26
A0A0C4DG49	PVR	Poliovirus receptor OS=Homo sapiens OX=9606 GN=PVR PE=1 SV=1	347.151	0.685758	1.60855	0.11112	6.17134	6.77152e-10	1.37808e-08	285.363	246.66	266.387	435.264	412.948	436.286
Q7KZ85	SUPT6H	Transcription elongation factor SPT6 OS=Homo sapiens OX=9606 GN=SUPT6H PE=1 SV=2	1863.04	0.685569	1.60834	0.0761866	8.99855	2.28714e-19	9.60238e-18	1417.36	1327.72	1540.88	2374.07	2256.21	2261.99
P62979	RPS27A	Ubiquitin-40S ribosomal protein S27a OS=Homo sapiens OX=9606 GN=RPS27A PE=1 SV=2	8157.2	0.683362	1.60588	0.267944	2.55039	0.0107604	0.0482543	6296.88	6223.35	6261.57	5878.61	12045.9	12236.9
Q9BXR0	QTRT1	Queuine tRNA-ribosyltransferase catalytic subunit 1 OS=Homo sapiens OX=9606 GN=QTRT1 PE=1 SV=3	563.812	0.681827	1.60417	0.249223	2.73582	0.0062226	0.0312419	440.328	425.874	432.754	469.922	801.058	812.936
Q70UQ0	IKBIP	Inhibitor of nuclear factor kappa-B kinase-interacting protein OS=Homo sapiens OX=9606 GN=IKBIP PE=1 SV=1	1839.52	0.681344	1.60363	0.200703	3.39479	0.000686808	0.00485952	1181.14	1203.43	1854.8	2293.54	2292.43	2211.77
Q8WUY1	THEM6	Protein THEM6 OS=Homo sapiens OX=9606 GN=THEM6 PE=1 SV=2	878.783	0.681103	1.60336	0.0643323	10.5873	3.41413e-26	2.30432e-24	683.17	661.935	680.326	1112.11	1077.39	1057.76
Q9UJ70-2	NAGK	Isoform 2 of N-acetyl-D-glucosamine kinase OS=Homo sapiens OX=9606 GN=NAGK	511.774	0.676658	1.59843	0.151103	4.47813	7.52981e-06	8.6912e-05	402.532	402.75	376.308	573.896	573.367	741.791
Q16204	CCDC6	Coiled-coil domain-containing protein 6 OS=Homo sapiens OX=9606 GN=CCDC6 PE=1 SV=2	1777.64	0.671427	1.59265	0.23781	2.82338	0.00475206	0.024982	945.855	1378.79	1789.44	2196.71	2252.07	2102.96
P53634	CTSC	Dipeptidyl peptidase 1 OS=Homo sapiens OX=9606 GN=CTSC PE=1 SV=2	1617.65	0.670999	1.59217	0.113348	5.91981	3.22315e-09	6.01621e-08	1292.64	1265.1	1186.36	1901.09	1799.79	2260.95
O43805	SSNA1	Sjoegren syndrome nuclear autoantigen 1 OS=Homo sapiens OX=9606 GN=SSNA1 PE=1 SV=2	467.628	0.664725	1.58527	0.0850389	7.81672	5.42167e-15	1.68072e-13	373.239	360.355	351.551	569.819	581.647	569.16
P08621	SNRNP70	U1 small nuclear ribonucleoprotein 70 kDa OS=Homo sapiens OX=9606 GN=SNRNP70 PE=1 SV=2	5054.55	0.664098	1.58458	0.252392	2.63122	0.00850789	0.0404675	3120.09	3117.94	5496.08	5243.55	6473.67	6875.95
P13727	PRG2	Bone marrow proteoglycan OS=Homo sapiens OX=9606 GN=PRG2 PE=1 SV=2	6386.15	0.661668	1.58191	0.106526	6.21131	5.25433e-10	1.08604e-08	5330.24	4290.54	5219.79	7872.47	8335.56	7268.3
P51692	STAT5B	Signal transducer and activator of transcription 5B OS=Homo sapiens OX=9606 GN=STAT5B PE=1 SV=2	1910.8	0.653763	1.57327	0.0475762	13.7414	5.73581e-43	8.7381e-41	1488.23	1498.27	1468.59	2314.95	2282.08	2412.65
P46736	BRCC3	Lys-63-specific deubiquitinase BRCC36 OS=Homo sapiens OX=9606 GN=BRCC3 PE=1 SV=2	600.45	0.651901	1.57124	0.0894842	7.2851	3.21432e-13	9.06811e-12	469.62	480.794	450.58	694.18	778.289	729.236
Q9ULG6-5	CCPG1	Isoform 5 of Cell cycle progression protein 1 OS=Homo sapiens OX=9606 GN=CCPG1	257.705	0.648789	1.56785	0.254134	2.55294	0.0106817	0.0479416	213.55	202.338	186.174	223.238	377.76	343.17
Q08379	GOLGA2	Golgin subfamily A member 2 OS=Homo sapiens OX=9606 GN=GOLGA2 PE=1 SV=3	1407.89	0.646335	1.56519	0.187981	3.4383	0.000585389	0.00423157	924.122	1020.36	1348.77	1596.31	1579.35	1978.46
J3KQL8	APOL2	Apolipoprotein L2 OS=Homo sapiens OX=9606 GN=APOL2 PE=1 SV=2	659.759	0.636157	1.55418	0.0731031	8.70219	3.2553e-18	1.30506e-16	522.535	527.043	500.094	809.367	785.533	813.982
Q15555	MAPRE2	Microtubule-associated protein RP/EB family member 2 OS=Homo sapiens OX=9606 GN=MAPRE2 PE=1 SV=1	1897.89	0.636059	1.55408	0.0653991	9.7258	2.34061e-22	1.26062e-20	1527.92	1459.73	1470.57	2173.26	2431.12	2324.77
P36222	CHI3L1	Chitinase-3-like protein 1 OS=Homo sapiens OX=9606 GN=CHI3L1 PE=1 SV=2	1313.38	0.635998	1.55401	0.0642755	9.89487	4.38183e-23	2.51225e-21	1039.4	984.713	1061.59	1650.33	1608.33	1535.89
Q9BV44	THUMPD3	THUMP domain-containing protein 3 OS=Homo sapiens OX=9606 GN=THUMPD3 PE=1 SV=1	993.88	0.634543	1.55245	0.0569677	11.1386	8.13535e-29	6.37907e-27	784.275	775.63	776.383	1221.19	1202.62	1203.19
Q7L9B9	EEPD1	Endonuclease/exonuclease/phosphatase family domain-containing protein 1 OS=Homo sapiens OX=9606 GN=EEPD1 PE=1 SV=2	435.595	0.633663	1.5515	0.0898729	7.05066	1.78074e-12	4.72384e-11	356.231	340.121	327.784	530.064	523.689	535.68
Q9BQS8-4	FYCO1	Isoform 4 of FYVE and coiled-coil domain-containing protein 1 OS=Homo sapiens OX=9606 GN=FYCO1	1027.62	0.633522	1.55135	0.0557192	11.3699	5.90505e-30	4.99773e-28	805.063	803.572	808.072	1257.88	1244.02	1247.13
Q9BVC6	TMEM109	Transmembrane protein 109 OS=Homo sapiens OX=9606 GN=TMEM109 PE=1 SV=1	1335.63	0.631459	1.54913	0.0951572	6.63596	3.22406e-11	7.47422e-10	1074.36	933.647	1135.86	1589.17	1659.04	1621.69
P13640	MT1G	Metallothionein-1G OS=Homo sapiens OX=9606 GN=MT1G PE=1 SV=2	365.752	0.629294	1.54681	0.165067	3.81236	0.000137646	0.00119145	316.545	311.216	233.707	436.283	467.801	428.962
Q9BRT3	MIEN1	Migration and invasion enhancer 1 OS=Homo sapiens OX=9606 GN=MIEN1 PE=1 SV=1	665.927	0.627409	1.54479	0.242428	2.58802	0.00965304	0.0445628	545.213	503.919	520.89	552.489	934.567	938.486
P80217-2	IFI35	Isoform 2 of Interferon-induced 35 kDa protein OS=Homo sapiens OX=9606 GN=IFI35	1012.73	0.625738	1.543	0.143485	4.36099	1.29477e-05	0.000142934	650.098	867.164	872.441	1240.55	1248.16	1197.96
Q7L4I2	RSRC2	Arginine/serine-rich coiled-coil protein 2 OS=Homo sapiens OX=9606 GN=RSRC2 PE=1 SV=1	937.441	0.62529	1.54252	0.0643758	9.71312	2.65087e-22	1.41345e-20	743.644	750.579	717.956	1172.26	1133.28	1106.93
Q13011	ECH1	Delta(3,5)-Delta(2,4)-dienoyl-CoA isomerase, mitochondrial OS=Homo sapiens OX=9606 GN=ECH1 PE=1 SV=2	4410.55	0.623088	1.54017	0.0881238	7.0706	1.54267e-12	4.11275e-11	3297.74	3223.92	3896.77	5458.64	5343.49	5242.76
A0A0A0MTH3	ILK	Integrin-linked protein kinase OS=Homo sapiens OX=9606 GN=ILK PE=1 SV=1	3724.8	0.617483	1.5342	0.0888896	6.94663	3.74107e-12	9.63643e-11	2785.59	2745.06	3288.74	4592.19	4585.9	4351.35
A6NC48	BST1	ADP-ribosyl cyclase/cyclic ADP-ribose hydrolase 2 OS=Homo sapiens OX=9606 GN=BST1 PE=1 SV=1	1118.98	0.616435	1.53308	0.076867	8.01949	1.06182e-15	3.53851e-14	909.003	916.303	824.907	1360.84	1405.47	1297.35
G3V5T9	CDK2	Cyclin-dependent kinase 2 OS=Homo sapiens OX=9606 GN=CDK2 PE=1 SV=1	794.356	0.615516	1.53211	0.0725749	8.48112	2.23038e-17	8.61768e-16	650.098	596.416	635.763	968.386	978.036	937.44
P32942	ICAM3	Intercellular adhesion molecule 3 OS=Homo sapiens OX=9606 GN=ICAM3 PE=1 SV=2	2509.11	0.608472	1.52464	0.0568803	10.6974	1.04658e-26	7.44048e-25	2076.91	1881.75	2004.34	3055	3089.35	2947.29
Q8WUX2	CHAC2	Glutathione-specific gamma-glutamylcyclotransferase 2 OS=Homo sapiens OX=9606 GN=CHAC2 PE=1 SV=1	626.384	0.606013	1.52205	0.0747482	8.1074	5.1714e-16	1.80222e-14	500.802	497.174	492.172	752.283	780.359	735.514
P40121	CAPG	Macrophage-capping protein OS=Homo sapiens OX=9606 GN=CAPG PE=1 SV=2	2420.52	0.60572	1.52174	0.0653883	9.26343	1.97971e-20	9.42481e-19	1983.37	1980.02	1795.39	2912.29	3032.43	2819.64
O43913	ORC5	Origin recognition complex subunit 5 OS=Homo sapiens OX=9606 GN=ORC5 PE=1 SV=1	1974.73	0.597731	1.51334	0.131587	4.54249	5.5594e-06	6.55813e-05	1525.08	1591.73	1597.33	1968.37	2637.07	2528.79
Q6PCB5	RSBN1L	Round spermatid basic protein 1-like protein OS=Homo sapiens OX=9606 GN=RSBN1L PE=1 SV=2	1086.31	0.596666	1.51222	0.0924038	6.45716	1.06689e-10	2.3802e-09	949.634	835.368	809.063	1285.4	1271.96	1366.4
B4DUT8	CNN2	Calponin OS=Homo sapiens OX=9606 GN=CNN2 PE=1 SV=1	3088.98	0.591204	1.5065	0.073956	7.994	1.30633e-15	4.27321e-14	2533.3	2482.98	2377.67	3607.49	3503.33	4029.11
Q8NGA1	OR1M1	Olfactory receptor 1M1 OS=Homo sapiens OX=9606 GN=OR1M1 PE=2 SV=1	436.418	0.58993	1.50517	0.166362	3.54607	0.000391018	0.00295732	348.672	301.58	395.124	529.044	581.647	462.442
Q9H5H4	ZNF768	Zinc finger protein 768 OS=Homo sapiens OX=9606 GN=ZNF768 PE=1 SV=2	343.279	0.588318	1.50349	0.216373	2.719	0.00654802	0.0325546	286.308	264.003	272.328	306.825	470.906	459.304
Q9NS91	RAD18	E3 ubiquitin-protein ligase RAD18 OS=Homo sapiens OX=9606 GN=RAD18 PE=1 SV=2	1051.72	0.587746	1.5029	0.0643048	9.14	6.24496e-20	2.82188e-18	854.199	807.426	859.567	1223.22	1294.73	1271.19
P49755	TMED10	Transmembrane emp24 domain-containing protein 10 OS=Homo sapiens OX=9606 GN=TMED10 PE=1 SV=2	2323.68	0.585941	1.50102	0.225771	2.59529	0.009451	0.0440047	1830.29	1855.73	1888.47	1906.19	2994.13	3467.27
F5H211	ATXN3	Ataxin-3 OS=Homo sapiens OX=9606 GN=ATXN3 PE=1 SV=2	1119.52	0.585821	1.50089	0.156117	3.75244	0.000175121	0.00146816	920.342	864.274	901.159	1101.92	1347.52	1581.93
P62820	RAB1A	Ras-related protein Rab-1A OS=Homo sapiens OX=9606 GN=RAB1A PE=1 SV=3	8231.34	0.585235	1.50028	0.0995417	5.8793	4.11999e-09	7.54907e-08	6191.05	6156.86	7405.35	9073.26	10395.1	10166.4
Q8NFH3	NUP43	Nucleoporin Nup43 OS=Homo sapiens OX=9606 GN=NUP43 PE=1 SV=1	696.971	0.584231	1.49924	0.0719111	8.12435	4.49754e-16	1.58814e-14	575.45	555.949	541.686	855.237	823.827	829.676
P15814	IGLL1	Immunoglobulin lambda-like polypeptide 1 OS=Homo sapiens OX=9606 GN=IGLL1 PE=1 SV=1	852.275	-0.590679	0.664031	0.0693285	-8.51999	1.59566e-17	6.21024e-16	1068.69	1001.09	1003.16	687.044	688.247	665.415
Q9UM22	EPDR1	Mammalian ependymin-related protein 1 OS=Homo sapiens OX=9606 GN=EPDR1 PE=1 SV=2	122.304	-0.68846	0.620516	0.167099	-4.12007	3.7875e-05	0.000379605	154.02	151.272	147.552	95.8192	98.3211	86.8387
P46821	MAP1B	Microtubule-associated protein 1B OS=Homo sapiens OX=9606 GN=MAP1B PE=1 SV=2	228.668	-0.694627	0.617869	0.136749	-5.07958	3.78277e-07	5.29389e-06	268.354	308.325	271.338	175.329	167.663	181.001
Q92824	PCSK5	Proprotein convertase subtilisin/kexin type 5 OS=Homo sapiens OX=9606 GN=PCSK5 PE=1 SV=4	96.6309	-0.752105	0.593737	0.248802	-3.0229	0.00250361	0.0147506	114.334	147.418	101.999	72.3741	66.2373	77.4225
Q9HB29	IL1RL2	Interleukin-1 receptor-like 2 OS=Homo sapiens OX=9606 GN=IL1RL2 PE=1 SV=2	226.484	-0.850314	0.554664	0.216777	-3.92253	8.76222e-05	0.000801375	275.914	357.464	240.639	156.98	152.139	175.77
Q96JE9	MAP6	Microtubule-associated protein 6 OS=Homo sapiens OX=9606 GN=MAP6 PE=1 SV=2	79.3588	-1.10876	0.463692	0.218958	-5.06382	4.10945e-07	5.70614e-06	108.665	115.622	101.009	53.0064	45.5382	52.3125

## Sheet: NETs-treated HCT116 vs Control
Supplementary Table Quantitative proteomic analysis of NETs-treated CRC cell lines ( NETs-treated HCT116 vs control, significant changed proteins )
Accession	Name	Description	baseMean	log2FoldChange	Fold Change	lfcSE	stat	pvalue	padj	Control-1	Control-2	Control-3	HCT116-1	HCT116-2	HCT116-3
Q9H0W9	C11orf54	Ester hydrolase C11orf54 OS=Homo sapiens OX=9606 GN=C11orf54 PE=1 SV=1	320.592	2.90014	7.46501	0.137381	21.1102	6.40956e-99	2.93985e-96	72.3905	78.9868	75.8575	537.678	573.969	584.668
Q9Y2H0	DLGAP4	Disks large-associated protein 4 OS=Homo sapiens OX=9606 GN=DLGAP4 PE=1 SV=3	311.531	2.79877	6.95846	0.413015	6.77644	1.23176e-11	2.35403e-10	80.9631	78.0235	75.8575	267.825	691.254	675.265
Q9GZZ1	NAA50	N-alpha-acetyltransferase 50 OS=Homo sapiens OX=9606 GN=NAA50 PE=1 SV=1	1682.23	2.74411	6.69974	0.347908	7.88745	3.08422e-15	8.57351e-14	445.773	517.267	347.762	1605.93	3556.95	3619.67
Q5H9R7-5	PPP6R3	Isoform 5 of Serine/threonine-protein phosphatase 6 regulatory subunit 3 OS=Homo sapiens OX=9606 GN=PPP6R3	1112.19	2.57996	5.97921	0.429096	6.01254	1.82644e-09	2.6385e-08	279.084	335.212	341.851	812.604	2495.16	2409.25
Q9BTC8	MTA3	Metastasis-associated protein MTA3 OS=Homo sapiens OX=9606 GN=MTA3 PE=1 SV=2	753.611	2.49377	5.63248	0.105437	23.6518	1.13224e-123	6.92425e-121	219.076	232.144	230.528	1174.78	1344.11	1321.03
Q8TF74	WIPF2	WAS/WASL-interacting protein family member 2 OS=Homo sapiens OX=9606 GN=WIPF2 PE=1 SV=1	261.538	2.43648	5.41319	0.732812	3.32483	0.000884721	0.00441078	44.7678	44.3097	155.656	149.13	582.273	593.095
Q12800-4	TFCP2	Isoform 4 of Alpha-globin transcription factor CP2 OS=Homo sapiens OX=9606 GN=TFCP2	687.453	2.19715	4.58572	0.0838233	26.2117	1.9571e-151	3.59062e-148	257.177	244.666	236.439	1144.34	1103.31	1138.79
P51148-2	RAB5C	Isoform 2 of Ras-related protein Rab-5C OS=Homo sapiens OX=9606 GN=RAB5C	2129.21	2.12278	4.35531	0.138158	15.3649	2.81681e-53	4.6981e-51	783.913	838.994	762.515	2883.17	3888.05	3618.62
Q99598	TSNAX	Translin-associated protein X OS=Homo sapiens OX=9606 GN=TSNAX PE=1 SV=1	1127.57	2.10101	4.29009	0.0634432	33.1164	1.7287e-240	9.51479e-237	441.963	417.089	419.679	1831.15	1825.7	1829.85
Q5T9B7	AK1	Adenylate kinase isoenzyme 1 OS=Homo sapiens OX=9606 GN=AK1 PE=1 SV=1	1007.38	2.00546	4.01516	0.0789846	25.3905	3.21215e-142	2.94661e-139	427.675	393.007	384.213	1553.18	1658.59	1627.59
O43852-4	CALU	Isoform 4 of Calumenin OS=Homo sapiens OX=9606 GN=CALU	456.339	1.90137	3.73569	0.661631	2.87377	0.00405605	0.0160493	212.409	206.136	159.596	154.202	991.213	1014.48
Q9UDY4	DNAJB4	DnaJ homolog subfamily B member 4 OS=Homo sapiens OX=9606 GN=DNAJB4 PE=1 SV=1	1440.06	1.8886	3.70275	0.487355	3.8752	0.000106535	0.000692289	634.369	605.887	597.008	783.184	2784.74	3235.16
P49914	MTHFS	5-formyltetrahydrofolate cyclo-ligase OS=Homo sapiens OX=9606 GN=MTHFS PE=1 SV=2	936.603	1.86895	3.65266	0.0720885	25.9257	3.41657e-148	4.7012e-145	385.765	400.714	421.649	1503.47	1445.82	1462.2
P50148	GNAQ	Guanine nucleotide-binding protein G(q) subunit alpha OS=Homo sapiens OX=9606 GN=GNAQ PE=1 SV=4	318.254	1.86329	3.63837	0.127276	14.6398	1.56504e-48	2.05095e-46	149.544	128.113	133.982	527.533	484.708	485.643
P08648	ITGA5	Integrin alpha-5 OS=Homo sapiens OX=9606 GN=ITGA5 PE=1 SV=2	489.763	1.8556	3.61902	0.125713	14.7605	2.63152e-49	3.81155e-47	209.551	217.695	208.854	709.126	738.998	854.352
P20962	PTMS	Parathymosin OS=Homo sapiens OX=9606 GN=PTMS PE=1 SV=2	7040.26	1.83641	3.57121	0.117904	15.5756	1.06724e-54	1.83565e-52	2973.73	3583.3	2683.58	11282.1	10926.2	10792.7
O76003	GLRX3	Glutaredoxin-3 OS=Homo sapiens OX=9606 GN=GLRX3 PE=1 SV=2	1495.35	1.73407	3.32666	0.611948	2.83369	0.00460134	0.0178602	365.762	359.294	1348.69	1650.57	1582.83	3664.97
Q9HBH0	RHOF	Rho-related GTP-binding protein RhoF OS=Homo sapiens OX=9606 GN=RHOF PE=1 SV=1	1222.42	1.73234	3.32266	0.199318	8.69136	3.58129e-18	1.24756e-16	530.546	574.099	592.082	1394.92	2072.72	2170.12
P84085	ARF5	ADP-ribosylation factor 5 OS=Homo sapiens OX=9606 GN=ARF5 PE=1 SV=2	1741.52	1.71335	3.27921	0.570712	3.00213	0.00268101	0.0112902	839.158	788.905	813.744	776.082	2441.19	4790.06
Q8NB16	MLKL	Mixed lineage kinase domain-like protein OS=Homo sapiens OX=9606 GN=MLKL PE=1 SV=1	212.834	1.69285	3.23295	0.641539	2.63873	0.00832171	0.0290812	98.1082	103.068	100.487	81.159	435.926	458.253
I3L0E3	hCG_1984214	HCG1984214, isoform CRA_a OS=Homo sapiens OX=9606 GN=hCG_1984214 PE=4 SV=1	360.402	1.68295	3.21085	0.431316	3.90191	9.54383e-05	0.000627129	164.784	174.349	174.374	248.549	682.951	717.403
Q9NWU1	OXSM	3-oxoacyl-[acyl-carrier-protein] synthase, mitochondrial OS=Homo sapiens OX=9606 GN=OXSM PE=1 SV=1	369.553	1.63714	3.11049	0.477414	3.42919	0.000605395	0.00317645	184.786	175.312	179.299	221.158	715.126	741.633
Q9UHQ4-2	BCAP29	Isoform 2 of B-cell receptor-associated protein 29 OS=Homo sapiens OX=9606 GN=BCAP29	497.689	1.63656	3.10924	0.114795	14.2564	4.08874e-46	4.59274e-44	264.797	226.365	235.454	797.387	707.861	754.274
Q9NRA8-3	EIF4ENIF1	Isoform 3 of Eukaryotic translation initiation factor 4E transporter OS=Homo sapiens OX=9606 GN=EIF4ENIF1	433.864	1.62586	3.08626	0.440691	3.68934	0.000224838	0.00133065	219.076	206.136	211.81	429.128	419.319	1117.72
O94763	URI1	Unconventional prefoldin RPB5 interactor 1 OS=Homo sapiens OX=9606 GN=URI1 PE=1 SV=3	864.167	1.49561	2.81984	0.0957282	15.6235	5.03308e-55	8.93615e-53	484.826	460.435	411.798	1255.93	1232.01	1340
P41214	EIF2D	Eukaryotic translation initiation factor 2D OS=Homo sapiens OX=9606 GN=EIF2D PE=1 SV=3	298.127	1.4334	2.70082	0.116256	12.3296	6.27425e-35	5.23234e-33	157.164	172.422	153.685	423.041	445.267	437.184
Q6P4E1-4	CASC4	Isoform 4 of Protein CASC4 OS=Homo sapiens OX=9606 GN=CASC4	603.338	1.39661	2.63282	0.0805682	17.3345	2.58156e-67	7.10977e-65	339.092	340.992	316.237	881.589	864.587	877.528
P19623	SRM	Spermidine synthase OS=Homo sapiens OX=9606 GN=SRM PE=1 SV=1	1823.1	1.37443	2.59266	0.0535511	25.6658	2.81539e-145	3.09918e-142	1018.23	1001.78	1024.57	2568.68	2596.87	2728.45
O75530	EED	Polycomb protein EED OS=Homo sapiens OX=9606 GN=EED PE=1 SV=2	809.941	1.34949	2.54822	0.461064	2.92691	0.00342353	0.0138247	433.39	464.288	471.893	451.447	1517.44	1521.19
Q13042	CDC16	Cell division cycle protein 16 homolog OS=Homo sapiens OX=9606 GN=CDC16 PE=1 SV=2	1165.35	1.34254	2.53597	0.334841	4.00948	6.08527e-05	0.000420771	482.921	470.068	1024.57	1703.32	1675.2	1636.02
Q9NX20	MRPL16	39S ribosomal protein L16, mitochondrial OS=Homo sapiens OX=9606 GN=MRPL16 PE=1 SV=1	647.415	1.32542	2.50606	0.074838	17.7106	3.47536e-70	1.06269e-67	363.857	373.742	370.421	940.429	923.748	912.292
O43156	TTI1	TELO2-interacting protein 1 homolog OS=Homo sapiens OX=9606 GN=TTI1 PE=1 SV=3	428.368	1.32329	2.50237	0.0918074	14.4138	4.2379e-47	5.18342e-45	238.127	251.409	244.32	609.707	605.107	621.539
Q99808-2	SLC29A1	Isoform 2 of Equilibrative nucleoside transporter 1 OS=Homo sapiens OX=9606 GN=SLC29A1	744.341	1.30769	2.47545	0.524458	2.49341	0.0126523	0.0407478	418.15	437.317	429.531	338.839	1408.46	1433.75
H0YL70	TLE3	Transducin-like enhancer protein 3 OS=Homo sapiens OX=9606 GN=TLE3 PE=1 SV=1	955.241	1.29671	2.45669	0.0623471	20.7983	4.48349e-96	1.89824e-93	543.881	558.687	555.631	1380.72	1344.11	1348.42
O75494	SRSF10	Serine/arginine-rich splicing factor 10 OS=Homo sapiens OX=9606 GN=SRSF10 PE=1 SV=1	1619.7	1.29157	2.44794	0.401774	3.21466	0.00130599	0.00615271	727.715	1069.21	1021.61	1492.31	1620.19	3787.17
Q16831	UPP1	Uridine phosphorylase 1 OS=Homo sapiens OX=9606 GN=UPP1 PE=1 SV=1	1491.56	1.25911	2.39348	0.204799	6.14801	7.84595e-10	1.18638e-08	735.335	747.485	1154.61	2110.13	2140.19	2061.61
Q96GA7	SDSL	Serine dehydratase-like OS=Homo sapiens OX=9606 GN=SDSL PE=1 SV=1	760.24	1.25446	2.38577	0.347557	3.60936	0.000306957	0.00176356	423.865	466.215	457.115	572.171	1336.84	1305.23
Q9UI42	CPA4	Carboxypeptidase A4 OS=Homo sapiens OX=9606 GN=CPA4 PE=1 SV=2	573.603	1.24516	2.37045	0.362988	3.43031	0.000602903	0.00316639	341.95	331.359	347.762	419.998	982.91	1017.64
P38432	COIL	Coilin OS=Homo sapiens OX=9606 GN=COIL PE=1 SV=1	1793.96	1.24422	2.36891	0.249741	4.98204	6.29185e-07	6.43687e-06	881.068	823.582	1490.55	2583.9	2482.7	2501.96
O75489	NDUFS3	NADH dehydrogenase [ubiquinone] iron-sulfur protein 3, mitochondrial OS=Homo sapiens OX=9606 GN=NDUFS3 PE=1 SV=1	2168.4	1.24351	2.36774	0.0509996	24.3827	2.60875e-131	2.05123e-128	1327.79	1293.65	1241.3	2974.48	3101.3	3071.88
O14929	HAT1	Histone acetyltransferase type B catalytic subunit OS=Homo sapiens OX=9606 GN=HAT1 PE=1 SV=1	705.397	1.23052	2.34651	0.0760909	16.1717	7.98459e-59	1.56954e-56	421.96	418.052	424.605	951.589	994.327	1021.85
Q6IAN0	DHRS7B	Dehydrogenase/reductase SDR family member 7B OS=Homo sapiens OX=9606 GN=DHRS7B PE=1 SV=2	449.017	1.2247	2.33708	0.0948252	12.9154	3.68591e-38	3.55917e-36	273.369	264.895	268.949	599.562	633.131	654.196
Q969X5	ERGIC1	Endoplasmic reticulum-Golgi intermediate compartment protein 1 OS=Homo sapiens OX=9606 GN=ERGIC1 PE=1 SV=1	3516.87	1.22359	2.33527	0.265241	4.61313	3.96642e-06	3.53255e-05	1291.6	2554.55	2480.64	4837.07	4919.74	5017.61
O15525	MAFG	Transcription factor MafG OS=Homo sapiens OX=9606 GN=MAFG PE=1 SV=1	786.684	1.21677	2.32427	0.0744	16.3545	4.03943e-60	8.55117e-58	493.398	467.178	459.085	1090.57	1074.25	1135.63
Q9H0E9-2	BRD8	Isoform 2 of Bromodomain-containing protein 8 OS=Homo sapiens OX=9606 GN=BRD8	390.554	1.21646	2.32376	0.184147	6.60593	3.95018e-11	6.99093e-10	256.224	235.997	212.795	655.359	487.822	495.124
Q9BU61	NDUFAF3	NADH dehydrogenase [ubiquinone] 1 alpha subcomplex assembly factor 3 OS=Homo sapiens OX=9606 GN=NDUFAF3 PE=1 SV=1	462.755	1.18713	2.27699	0.160268	7.40715	1.29045e-13	3.03531e-12	230.507	291.866	325.103	659.417	618.6	651.036
Q00765	REEP5	Receptor expression-enhancing protein 5 OS=Homo sapiens OX=9606 GN=REEP5 PE=1 SV=3	5236.87	1.16441	2.24142	0.0819395	14.2107	7.86896e-46	8.66215e-44	3589.04	3067	3037.25	7193.73	7342.24	7191.94
Q8TB52	FBXO30	F-box only protein 30 OS=Homo sapiens OX=9606 GN=FBXO30 PE=1 SV=3	679.791	1.1514	2.22129	0.197041	5.84347	5.11248e-09	7.12381e-08	366.715	431.538	467.952	835.937	823.07	1153.53
Q9Y3B8	REXO2	Oligoribonuclease, mitochondrial OS=Homo sapiens OX=9606 GN=REXO2 PE=1 SV=3	3228.45	1.13362	2.19409	0.359244	3.15558	0.00160181	0.00728626	1534.49	1500.75	3029.37	2927.81	5161.57	5216.71
A0A2R8YE63	EPS8	Epidermal growth factor receptor kinase substrate 8 OS=Homo sapiens OX=9606 GN=EPS8 PE=1 SV=1	2172.56	1.12701	2.18406	0.204655	5.50689	3.65238e-08	4.50734e-07	1091.57	1220.44	1782.16	3176.36	2862.58	2902.27
Q96KC2	ARL5B	ADP-ribosylation factor-like protein 5B OS=Homo sapiens OX=9606 GN=ARL5B PE=1 SV=1	176.923	1.12589	2.18237	0.14169	7.94615	1.92402e-15	5.40295e-14	109.538	114.627	109.353	232.318	242.873	252.829
P62318	SNRPD3	Small nuclear ribonucleoprotein Sm D3 OS=Homo sapiens OX=9606 GN=SNRPD3 PE=1 SV=1	1720.37	1.12567	2.18203	0.378943	2.97056	0.00297254	0.0122921	1101.1	1038.39	1104.37	1106.81	2989.21	2982.33
Q9BXY0	MAK16	Protein MAK16 homolog OS=Homo sapiens OX=9606 GN=MAK16 PE=1 SV=2	620.68	1.10418	2.14976	0.303022	3.64388	0.00026856	0.00156418	399.1	391.081	392.094	659.417	642.472	1239.92
B4DUT8	CNN2	Calponin OS=Homo sapiens OX=9606 GN=CNN2 PE=1 SV=1	6282.32	1.0973	2.13954	0.0468419	23.4256	2.34388e-121	1.29007e-118	4203.41	3958.97	3843.12	8465.89	8545.19	8677.31
Q9H9T3	ELP3	Elongator complex protein 3 OS=Homo sapiens OX=9606 GN=ELP3 PE=1 SV=2	862.856	1.08594	2.12276	0.0918198	11.8269	2.83486e-32	2.10853e-30	593.412	548.091	516.225	1208.25	1205.02	1106.13
O60504	SORBS3	Vinexin OS=Homo sapiens OX=9606 GN=SORBS3 PE=1 SV=2	433.787	1.07002	2.09947	0.196403	5.4481	5.09094e-08	6.14485e-07	210.504	310.168	319.192	580.287	593.69	588.882
Q6ZRS2	SRCAP	Helicase SRCAP OS=Homo sapiens OX=9606 GN=SRCAP PE=1 SV=3	258.391	1.0637	2.09028	0.116024	9.1679	4.82308e-20	1.86945e-18	168.594	172.422	160.581	343.911	346.665	358.175
Q9NVH0	EXD2	Exonuclease 3'-5' domain-containing protein 2 OS=Homo sapiens OX=9606 GN=EXD2 PE=1 SV=2	1089.02	1.05654	2.07994	0.0646385	16.3454	4.68876e-60	9.55812e-58	695.33	707.991	718.183	1453.76	1427.14	1531.72
Q14258	TRIM25	E3 ubiquitin/ISG15 ligase TRIM25 OS=Homo sapiens OX=9606 GN=TRIM25 PE=1 SV=2	6115.65	1.05064	2.07145	0.171885	6.11247	9.81026e-10	1.46916e-08	3259.48	4279.74	4407.61	7475.75	7464.72	9806.62
Q9Y5J1	UTP18	U3 small nucleolar RNA-associated protein 18 homolog OS=Homo sapiens OX=9606 GN=UTP18 PE=1 SV=3	2012.44	1.04603	2.06484	0.399653	2.61735	0.00886148	0.0305542	1236.35	1384.2	1319.13	1257.96	2810.69	4066.34
P30154-2	PPP2R1B	Isoform 2 of Serine/threonine-protein phosphatase 2A 65 kDa regulatory subunit A beta isoform OS=Homo sapiens OX=9606 GN=PPP2R1B	717.364	1.0325	2.04556	0.394234	2.61899	0.00881902	0.0304325	312.422	323.653	777.293	942.458	950.734	997.622
P16035	TIMP2	Metalloproteinase inhibitor 2 OS=Homo sapiens OX=9606 GN=TIMP2 PE=1 SV=2	248.933	1.03137	2.04396	0.164341	6.2758	3.47847e-10	5.50159e-09	162.879	189.761	137.923	335.795	324.869	342.373
P55199	ELL	RNA polymerase II elongation factor ELL OS=Homo sapiens OX=9606 GN=ELL PE=1 SV=1	757.562	1.02939	2.04117	0.422996	2.43358	0.0149505	0.0466747	332.425	312.094	850.195	987.096	1065.94	997.622
A0A0A0MTH9	BTAF1	TATA-binding protein-associated factor 172 OS=Homo sapiens OX=9606 GN=BTAF1 PE=1 SV=1	457.985	1.02847	2.03986	0.19069	5.39342	6.91277e-08	8.19998e-07	300.04	305.351	298.504	587.388	502.353	754.274
E7EQY1	FAM136A	Protein FAM136A OS=Homo sapiens OX=9606 GN=FAM136A PE=1 SV=1	3431.87	1.02707	2.03788	0.0694773	14.7828	1.89225e-49	2.89305e-47	2411.75	2258.83	2107.26	4686.93	4692.43	4433.99
Q9NXF1	TEX10	Testis-expressed protein 10 OS=Homo sapiens OX=9606 GN=TEX10 PE=1 SV=2	934.472	1.02492	2.03485	0.320959	3.19331	0.00140651	0.00654392	468.633	444.06	934.919	1289.41	1233.05	1236.76
Q9UKV8	AGO2	Protein argonaute-2 OS=Homo sapiens OX=9606 GN=AGO2 PE=1 SV=3	1856.48	1.02069	2.02889	0.0947465	10.7728	4.62586e-27	2.73771e-25	1163.01	1137.6	1377.26	2473.32	2491.01	2496.69
P17029	ZKSCAN1	Zinc finger protein with KRAB and SCAN domains 1 OS=Homo sapiens OX=9606 GN=ZKSCAN1 PE=1 SV=3	802.221	1.00792	2.01102	0.3648	2.76295	0.00572815	0.0214464	375.288	398.787	824.581	841.01	1181.15	1192.51
O75330-3	HMMR	Isoform 3 of Hyaluronan mediated motility receptor OS=Homo sapiens OX=9606 GN=HMMR	1172.59	0.997975	1.9972	0.118309	8.43535	3.30216e-17	1.06912e-15	691.52	779.272	876.794	1564.34	1471.77	1651.82
Q9Y6E0	STK24	Serine/threonine-protein kinase 24 OS=Homo sapiens OX=9606 GN=STK24 PE=1 SV=1	1372.96	0.997694	1.99681	0.344246	2.8982	0.00375309	0.0149906	740.098	733.999	1274.8	1502.46	1397.04	2589.39
Q96C19	EFHD2	EF-hand domain-containing protein D2 OS=Homo sapiens OX=9606 GN=EFHD2 PE=1 SV=1	6397.61	0.99369	1.99127	0.0988658	10.0509	9.10307e-24	4.59664e-22	4459.64	4168.96	4203.69	7436.19	9089.06	9028.11
Q9NXV6	CDKN2AIP	CDKN2A-interacting protein OS=Homo sapiens OX=9606 GN=CDKN2AIP PE=1 SV=3	804.777	0.993663	1.99123	0.330107	3.01013	0.00261136	0.0110306	295.277	652.123	666.955	1057.1	1073.21	1084.01
Q92890-1	UFD1	Isoform Long of Ubiquitin recognition factor in ER-associated degradation protein 1 OS=Homo sapiens OX=9606 GN=UFD1	1751.72	0.993086	1.99044	0.0732004	13.5667	6.31257e-42	6.43414e-40	1224.92	1129.9	1159.54	2183.18	2422.5	2390.29
Q53EU6	GPAT3	Glycerol-3-phosphate acyltransferase 3 OS=Homo sapiens OX=9606 GN=GPAT3 PE=1 SV=2	136.692	0.982607	1.97603	0.155637	6.31345	2.72874e-10	4.41735e-09	92.3931	88.6193	94.5756	177.535	182.674	184.355
Q9H2K8	TAOK3	Serine/threonine-protein kinase TAO3 OS=Homo sapiens OX=9606 GN=TAOK3 PE=1 SV=2	371.27	0.981979	1.97517	0.116248	8.44729	2.98155e-17	9.71033e-16	224.792	259.115	265.009	510.287	473.291	495.124
Q8WVJ2	NUDCD2	NudC domain-containing protein 2 OS=Homo sapiens OX=9606 GN=NUDCD2 PE=1 SV=1	2248.74	0.980895	1.97369	0.249367	3.93354	8.37036e-05	0.000557079	1238.26	1175.17	2124.01	3053.61	2960.15	2941.25
Q9UMY1	NOL7	Nucleolar protein 7 OS=Homo sapiens OX=9606 GN=NOL7 PE=1 SV=2	2798.97	0.956273	1.94029	0.198891	4.80802	1.52431e-06	1.45656e-05	1381.13	2171.17	2159.48	3998.09	3555.91	3528.02
Q00535	CDK5	Cyclin-dependent-like kinase 5 OS=Homo sapiens OX=9606 GN=CDK5 PE=1 SV=3	482.643	0.928129	1.90281	0.0836693	11.0928	1.35939e-28	8.60007e-27	341.95	326.543	329.044	633.04	627.941	637.341
P04264	KRT1	Keratin, type II cytoskeletal 1 OS=Homo sapiens OX=9606 GN=KRT1 PE=1 SV=6	6367.4	0.92627	1.90036	0.227891	4.06453	4.81296e-05	0.000340495	5253.07	4658.29	3260.89	10115.4	8178.8	6737.9
Q8NFH4	NUP37	Nucleoporin Nup37 OS=Homo sapiens OX=9606 GN=NUP37 PE=1 SV=1	3788.13	0.9242	1.89763	0.340627	2.71324	0.00666298	0.0242226	1315.41	3251.94	3276.65	5011.57	4911.43	4961.78
Q9UK99	FBXO3	F-box only protein 3 OS=Homo sapiens OX=9606 GN=FBXO3 PE=1 SV=3	657.664	0.921851	1.89454	0.362615	2.54223	0.0110147	0.0366314	455.298	451.766	456.13	443.331	1062.83	1076.63
Q712K3	UBE2R2	Ubiquitin-conjugating enzyme E2 R2 OS=Homo sapiens OX=9606 GN=UBE2R2 PE=1 SV=1	811.142	0.912927	1.88286	0.0745369	12.248	1.72224e-34	1.394e-32	592.459	559.65	535.928	1085.5	1049.34	1043.97
P49674	CSNK1E	Casein kinase I isoform epsilon OS=Homo sapiens OX=9606 GN=CSNK1E PE=1 SV=1	582.272	0.908323	1.87686	0.346383	2.62231	0.00873352	0.0302513	401.005	408.42	404.902	414.925	860.435	1003.94
Q6ZS17-4	RIPOR1	Isoform 4 of Rho family-interacting cell polarization regulator 1 OS=Homo sapiens OX=9606 GN=RIPOR1	482.6	0.902694	1.86955	0.211986	4.25826	2.06021e-05	0.000158371	355.285	323.653	330.029	466.664	709.937	710.029
P49721	PSMB2	Proteasome subunit beta type-2 OS=Homo sapiens OX=9606 GN=PSMB2 PE=1 SV=1	3941.15	0.901454	1.86795	0.255838	3.52353	0.000425841	0.00236035	2190.76	2130.72	3923.9	4939.54	5201.01	5260.96
P15407	FOSL1	Fos-related antigen 1 OS=Homo sapiens OX=9606 GN=FOSL1 PE=1 SV=1	1363.22	0.8933	1.85742	0.0557656	16.0188	9.44016e-58	1.73196e-55	929.646	939.172	994.028	1784.48	1776.92	1755.06
Q567U6	CCDC93	Coiled-coil domain-containing protein 93 OS=Homo sapiens OX=9606 GN=CCDC93 PE=1 SV=2	463.023	0.889004	1.8519	0.273356	3.25219	0.0011452	0.00549059	351.475	305.351	317.222	479.852	489.898	834.337
Q00577	PURA	Transcriptional activator protein Pur-alpha OS=Homo sapiens OX=9606 GN=PURA PE=1 SV=2	1576.66	0.885967	1.848	0.0496787	17.8339	3.85232e-71	1.24725e-68	1115.39	1100.04	1106.34	2095.93	2031.21	2011.05
O15231-3	ZNF185	Isoform 3 of Zinc finger protein 185 OS=Homo sapiens OX=9606 GN=ZNF185	3794	0.885168	1.84698	0.0548093	16.15	1.1365e-58	2.15699e-56	2544.14	2626.79	2825.44	4957.8	4851.23	4958.62
Q5JSH3	WDR44	WD repeat-containing protein 44 OS=Homo sapiens OX=9606 GN=WDR44 PE=1 SV=1	1968.31	0.884324	1.8459	0.236374	3.7412	0.000183142	0.0011126	1211.59	1191.54	1746.69	1931.58	2831.44	2897
Q13671	RIN1	Ras and Rab interactor 1 OS=Homo sapiens OX=9606 GN=RIN1 PE=1 SV=4	704.701	0.884141	1.84566	0.0725527	12.1862	3.68267e-34	2.89563e-32	487.683	509.561	488.64	921.154	932.051	889.116
Q14331	FRG1	Protein FRG1 OS=Homo sapiens OX=9606 GN=FRG1 PE=1 SV=1	2282.98	0.878387	1.83832	0.331475	2.64993	0.00805081	0.0283867	1002.99	1396.72	2426.45	2767.52	2713.12	3391.07
Q96S59	RANBP9	Ran-binding protein 9 OS=Homo sapiens OX=9606 GN=RANBP9 PE=1 SV=1	1430.77	0.87729	1.83692	0.352452	2.48911	0.0128064	0.041124	727.715	690.653	1607.78	1860.57	1811.17	1886.74
Q6Y7W6	GIGYF2	GRB10-interacting GYF protein 2 OS=Homo sapiens OX=9606 GN=GIGYF2 PE=1 SV=1	1406.21	0.877243	1.83686	0.266796	3.28806	0.00100879	0.00493588	961.079	894.863	1118.16	1206.22	1906.66	2350.26
P78417	GSTO1	Glutathione S-transferase omega-1 OS=Homo sapiens OX=9606 GN=GSTO1 PE=1 SV=2	9896.66	0.86852	1.82579	0.258737	3.35676	0.000788615	0.00396968	7379.07	6853.55	6780.87	7847.06	15076.8	15442.6
Q9NX58	LYAR	Cell growth-regulating nucleolar protein OS=Homo sapiens OX=9606 GN=LYAR PE=1 SV=2	3859.53	0.860765	1.816	0.322919	2.66557	0.00768571	0.0272741	2059.32	1946.74	4217.48	4740.7	4453.71	5739.23
Q13045	FLII	Protein flightless-1 homolog OS=Homo sapiens OX=9606 GN=FLII PE=1 SV=2	9979.25	0.858653	1.81334	0.129482	6.63147	3.32367e-11	5.90113e-10	6688.5	6363.25	8231.03	11590.5	13019.7	13982.5
P23743	DGKA	Diacylglycerol kinase alpha OS=Homo sapiens OX=9606 GN=DGKA PE=1 SV=3	1647.58	0.857051	1.81133	0.169965	5.0425	4.59479e-07	4.80793e-06	904.881	1304.25	1307.31	2023.9	2204.54	2140.62
P49902	NT5C2	Cytosolic purine 5'-nucleotidase OS=Homo sapiens OX=9606 GN=NT5C2 PE=1 SV=1	2453.68	0.856626	1.8108	0.286027	2.99491	0.00274522	0.0115068	1739.28	1775.28	1723.05	1862.6	3792.56	3829.31
Q6NZI2	CAVIN1	Caveolae-associated protein 1 OS=Homo sapiens OX=9606 GN=CAVIN1 PE=1 SV=1	3168.73	0.853955	1.80745	0.0672211	12.7037	5.64063e-37	5.00742e-35	2361.26	2216.45	2193.96	3831.72	4129.88	4279.14
P61586	RHOA	Transforming protein RhoA OS=Homo sapiens OX=9606 GN=RHOA PE=1 SV=1	2857.43	0.845867	1.79734	0.251558	3.36252	0.000772345	0.00390357	2263.16	1913.02	1952.59	2385.06	4234.71	4396.07
O43324	EEF1E1	Eukaryotic translation elongation factor 1 epsilon-1 OS=Homo sapiens OX=9606 GN=EEF1E1 PE=1 SV=1	1966.15	0.83335	1.78182	0.293769	2.83675	0.00455746	0.0177149	1250.64	1252.23	1737.83	1648.54	2542.9	3364.74
Q9BY32	ITPA	Inosine triphosphate pyrophosphatase OS=Homo sapiens OX=9606 GN=ITPA PE=1 SV=2	437.165	0.828644	1.77602	0.0918963	9.01716	1.93027e-19	7.32703e-18	297.182	322.69	325.103	551.881	563.59	562.545
Q7L4I2	RSRC2	Arginine/serine-rich coiled-coil protein 2 OS=Homo sapiens OX=9606 GN=RSRC2 PE=1 SV=1	986.527	0.823013	1.7691	0.160549	5.12624	2.9558e-07	3.2025e-06	708.665	580.842	848.224	1268.11	1281.83	1231.49
Q9NQX4	MYO5C	Unconventional myosin-Vc OS=Homo sapiens OX=9606 GN=MYO5C PE=1 SV=2	821.323	0.822706	1.76872	0.176482	4.66171	3.13593e-06	2.85764e-05	521.974	518.23	739.857	1079.41	1020.27	1048.19
P61081	UBE2M	NEDD8-conjugating enzyme Ubc12 OS=Homo sapiens OX=9606 GN=UBE2M PE=1 SV=1	4929.89	0.822207	1.76811	0.335012	2.45426	0.0141173	0.0445283	2513.66	2499.64	5672.56	6085.91	6359.33	6448.2
O14646	CHD1	Chromodomain-helicase-DNA-binding protein 1 OS=Homo sapiens OX=9606 GN=CHD1 PE=1 SV=2	1874.31	0.813858	1.75791	0.121013	6.72535	1.75172e-11	3.2794e-10	1407.8	1333.14	1336.86	2767.52	2236.72	2163.8
Q9UBQ5	EIF3K	Eukaryotic translation initiation factor 3 subunit K OS=Homo sapiens OX=9606 GN=EIF3K PE=1 SV=1	5447.62	0.811213	1.75469	0.265975	3.04996	0.00228871	0.00989557	4274.85	3817.37	3773.17	4248.67	8391.58	8180.08
Q9Y5Z4	HEBP2	Heme-binding protein 2 OS=Homo sapiens OX=9606 GN=HEBP2 PE=1 SV=1	1760.44	0.80736	1.75001	0.0465754	17.3345	2.58349e-67	7.10977e-65	1294.46	1274.38	1271.84	2193.32	2262.66	2265.98
P48634	PRRC2A	Protein PRRC2A OS=Homo sapiens OX=9606 GN=PRRC2A PE=1 SV=3	3054	0.804895	1.74702	0.104273	7.71908	1.17171e-14	3.10052e-13	1963.12	2224.15	2483.59	4027.51	3751.04	3874.61
Q9Y6G5	COMMD10	COMM domain-containing protein 10 OS=Homo sapiens OX=9606 GN=COMMD10 PE=1 SV=1	591.346	0.80445	1.74648	0.0784883	10.2493	1.19199e-24	6.36962e-23	426.723	428.648	436.427	725.358	757.681	773.236
P51452	DUSP3	Dual specificity protein phosphatase 3 OS=Homo sapiens OX=9606 GN=DUSP3 PE=1 SV=1	1145.85	0.803758	1.74564	0.062654	12.8285	1.13505e-37	1.07712e-35	874.401	825.508	803.892	1481.15	1442.71	1447.45
O14976	GAK	Cyclin-G-associated kinase OS=Homo sapiens OX=9606 GN=GAK PE=1 SV=2	2901.63	0.803613	1.74547	0.249997	3.21449	0.00130678	0.00615271	2114.56	2153.84	2072.78	2359.7	4365.49	4343.4
E9PSI1	3	Transmembrane 9 superfamily member OS=Homo sapiens OX=9606 PE=3 SV=1	2447.19	0.801497	1.74291	0.236044	3.39554	0.000684931	0.00351011	1289.69	1654.87	2408.72	3053.61	3184.34	3091.89
Q14011	CIRBP	Cold-inducible RNA-binding protein OS=Homo sapiens OX=9606 GN=CIRBP PE=1 SV=1	805.148	0.796927	1.7374	0.0852145	9.35201	8.5999e-21	3.61327e-19	622.939	574.099	567.453	963.763	1059.72	1042.92
Q9HCD5	NCOA5	Nuclear receptor coactivator 5 OS=Homo sapiens OX=9606 GN=NCOA5 PE=1 SV=2	2060.21	0.796373	1.73673	0.0466598	17.0677	2.58359e-65	6.46368e-63	1553.54	1485.34	1477.74	2653.9	2578.19	2612.57
Q16760	DGKD	Diacylglycerol kinase delta OS=Homo sapiens OX=9606 GN=DGKD PE=1 SV=4	128.972	0.792456	1.73202	0.166635	4.75565	1.97812e-06	1.85794e-05	89.5356	103.068	90.6349	161.303	170.219	159.072
Q5RKV6	EXOSC6	Exosome complex component MTR3 OS=Homo sapiens OX=9606 GN=EXOSC6 PE=1 SV=1	3130.12	0.79137	1.73072	0.208388	3.79759	0.000146112	0.000918038	1946.92	1947.7	2983.07	3444.18	4179.7	4279.14
Q12849	GRSF1	G-rich sequence factor 1 OS=Homo sapiens OX=9606 GN=GRSF1 PE=1 SV=3	4655.3	0.785235	1.72337	0.171476	4.57927	4.66605e-06	4.096e-05	3425.21	3514.91	3316.06	5082.58	5134.59	7458.47
Q969U7	PSMG2	Proteasome assembly chaperone 2 OS=Homo sapiens OX=9606 GN=PSMG2 PE=1 SV=1	2284.85	0.783323	1.72109	0.287059	2.72879	0.00635675	0.0233098	1609.74	1605.74	1822.55	1762.16	3073.28	3835.63
P02795	MT2A	Metallothionein-2 OS=Homo sapiens OX=9606 GN=MT2A PE=1 SV=1	6809.88	0.782451	1.72005	0.230744	3.391	0.000696379	0.00356215	3747.16	5795.9	5478.49	6593.15	10269.2	8975.44
Q15942	ZYX	Zyxin OS=Homo sapiens OX=9606 GN=ZYX PE=1 SV=1	5114.87	0.781961	1.71947	0.21798	3.58731	0.000334109	0.00189973	2592.72	4318.27	4374.12	5905.33	6840.93	6657.84
Q9NWK9	ZNHIT6	Box C/D snoRNA protein 1 OS=Homo sapiens OX=9606 GN=ZNHIT6 PE=1 SV=1	1525.77	0.780254	1.71743	0.0619825	12.5883	2.44934e-36	2.13987e-34	1175.39	1110.63	1082.69	1996.51	1894.2	1895.17
P05556	ITGB1	Integrin beta-1 OS=Homo sapiens OX=9606 GN=ITGB1 PE=1 SV=2	23839.7	0.776945	1.7135	0.248958	3.12079	0.00180367	0.00807762	13917.1	18065.8	20730.8	20575.8	32891.7	36857.2
Q99653	CHP1	Calcineurin B homologous protein 1 OS=Homo sapiens OX=9606 GN=CHP1 PE=1 SV=3	1741.95	0.773452	1.70936	0.133895	5.77655	7.62484e-09	1.02861e-07	1062.04	1392.86	1402.87	2124.34	2197.28	2272.3
P10644	PRKAR1A	cAMP-dependent protein kinase type I-alpha regulatory subunit OS=Homo sapiens OX=9606 GN=PRKAR1A PE=1 SV=1	8260.16	0.773155	1.709	0.134719	5.73904	9.52169e-09	1.25677e-07	5566.45	5442.38	7286.26	9981.54	10185.1	11099.2
F5H211	ATXN3	Ataxin-3 OS=Homo sapiens OX=9606 GN=ATXN3 PE=1 SV=2	495.675	0.77222	1.7079	0.296778	2.60201	0.00926798	0.0316838	365.762	368.926	363.525	383.476	729.657	762.702
P40222	TXLNA	Alpha-taxilin OS=Homo sapiens OX=9606 GN=TXLNA PE=1 SV=3	4175.63	0.771708	1.70729	0.195605	3.94523	7.97245e-05	0.000532529	2617.49	3001.5	3635.25	4094.47	5831.03	5874.07
Q9H974-4	QTRT2	Isoform 4 of Queuine tRNA-ribosyltransferase accessory subunit 2 OS=Homo sapiens OX=9606 GN=QTRT2	810.598	0.771312	1.70682	0.312484	2.46832	0.0135747	0.0432882	473.396	503.782	819.655	723.329	1160.39	1183.03
Q9ULW0	TPX2	Targeting protein for Xklp2 OS=Homo sapiens OX=9606 GN=TPX2 PE=1 SV=2	2653.85	0.766011	1.70056	0.177395	4.31811	1.57372e-05	0.000124094	1621.17	2102.78	2172.28	2733.03	3609.88	3683.93
O75175	CNOT3	CCR4-NOT transcription complex subunit 3 OS=Homo sapiens OX=9606 GN=CNOT3 PE=1 SV=1	895.764	0.760611	1.69421	0.293619	2.59047	0.00958452	0.0326241	530.546	498.965	965.459	1016.52	1183.23	1179.87
Q8TBC4	UBA3	NEDD8-activating enzyme E1 catalytic subunit OS=Homo sapiens OX=9606 GN=UBA3 PE=1 SV=2	3382.82	0.759649	1.69308	0.247408	3.07043	0.00213751	0.00931503	2622.25	2496.75	2417.59	2735.06	4956.06	5069.23
Q07352	ZFP36L1	mRNA decay activator protein ZFP36L1 OS=Homo sapiens OX=9606 GN=ZFP36L1 PE=1 SV=1	2286.21	0.757203	1.69021	0.0452881	16.7197	9.42034e-63	2.1604e-60	1724.04	1696.29	1678.72	2932.88	2895.79	2789.55
Q5SNT2	TMEM201	Transmembrane protein 201 OS=Homo sapiens OX=9606 GN=TMEM201 PE=1 SV=1	1062.34	0.75121	1.6832	0.290648	2.5846	0.00974916	0.0330822	635.322	582.768	1157.57	1343.18	1304.66	1350.53
O94760	DDAH1	N(G),N(G)-dimethylarginine dimethylaminohydrolase 1 OS=Homo sapiens OX=9606 GN=DDAH1 PE=1 SV=3	3402.07	0.750844	1.68278	0.0365942	20.5181	1.48261e-93	5.82878e-91	2528.9	2498.68	2581.12	4193.89	4296.99	4312.85
Q9UBP6	METTL1	tRNA (guanine-N(7)-)-methyltransferase OS=Homo sapiens OX=9606 GN=METTL1 PE=1 SV=1	1275.71	0.748855	1.68046	0.0535407	13.9867	1.88055e-44	2.02952e-42	954.411	960.364	940.83	1612.02	1623.31	1563.33
Q05655-2	PRKCD	Isoform 2 of Protein kinase C delta type OS=Homo sapiens OX=9606 GN=PRKCD	407.446	0.745046	1.67603	0.162822	4.57584	4.74309e-06	4.15039e-05	306.707	298.609	308.356	608.692	456.684	465.627
Q9P265	DIP2B	Disco-interacting protein 2 homolog B OS=Homo sapiens OX=9606 GN=DIP2B PE=1 SV=3	2992.04	0.744932	1.67589	0.0576412	12.9236	3.31335e-38	3.25655e-36	2213.63	2217.41	2277.69	3530.41	3892.2	3820.88
P61981	YWHAG	14-3-3 protein gamma OS=Homo sapiens OX=9606 GN=YWHAG PE=1 SV=2	6347.05	0.744857	1.67581	0.28167	2.64443	0.00818277	0.0287049	4854.93	4926.08	4450.96	4652.44	9309.1	9888.79
Q5T5P2	KIAA1217	Sickle tail protein homolog OS=Homo sapiens OX=9606 GN=KIAA1217 PE=1 SV=2	129.938	0.739714	1.66984	0.159754	4.63032	3.65093e-06	3.28882e-05	92.3931	103.068	96.5459	159.274	162.953	165.393
Q07666	KHDRBS1	KH domain-containing, RNA-binding, signal transduction-associated protein 1 OS=Homo sapiens OX=9606 GN=KHDRBS1 PE=1 SV=1	10952.6	0.738947	1.66896	0.278821	2.65025	0.00804316	0.0283779	5398.81	9787.62	9435.88	10044.4	15091.3	15957.7
O00151	PDLIM1	PDZ and LIM domain protein 1 OS=Homo sapiens OX=9606 GN=PDLIM1 PE=1 SV=4	3298.96	0.733906	1.66314	0.0959851	7.64603	2.07272e-14	5.38126e-13	2603.2	2392.72	2436.31	3655.2	4394.55	4311.79
Q9Y265	RUVBL1	RuvB-like 1 OS=Homo sapiens OX=9606 GN=RUVBL1 PE=1 SV=1	11444.1	0.730441	1.65915	0.184473	3.95961	7.50734e-05	0.000505758	7643.86	7271.6	10906.7	12500.5	14685.5	15656.5
Q9Y3A2	UTP11	Probable U3 small nucleolar RNA-associated protein 11 OS=Homo sapiens OX=9606 GN=UTP11 PE=1 SV=2	3294.57	0.725346	1.6533	0.0369741	19.6177	1.0921e-85	4.00728e-83	2538.43	2455.33	2456.01	4108.67	4053.07	4155.88
O14640	DVL1	Segment polarity protein dishevelled homolog DVL-1 OS=Homo sapiens OX=9606 GN=DVL1 PE=1 SV=2	983.491	0.718331	1.64528	0.259506	2.76807	0.00563895	0.0211566	484.826	808.17	937.874	1220.43	1242.39	1207.26
Q9NYZ3	GTSE1	G2 and S phase-expressed protein 1 OS=Homo sapiens OX=9606 GN=GTSE1 PE=1 SV=3	294.004	0.715723	1.64231	0.119708	5.97889	2.24657e-09	3.2034e-08	238.127	220.585	208.854	384.491	363.272	348.694
Q9BZD4	NUF2	Kinetochore protein Nuf2 OS=Homo sapiens OX=9606 GN=NUF2 PE=1 SV=2	508.574	0.714771	1.64122	0.114284	6.25434	3.99195e-10	6.22428e-09	392.433	381.448	381.258	562.026	663.23	671.051
Q6WKZ4	RAB11FIP1	Rab11 family-interacting protein 1 OS=Homo sapiens OX=9606 GN=RAB11FIP1 PE=1 SV=3	568.132	0.712879	1.63907	0.267493	2.66504	0.00769791	0.0272998	461.013	430.574	399.976	465.649	860.435	791.145
Q9Y487	ATP6V0A2	V-type proton ATPase 116 kDa subunit a isoform 2 OS=Homo sapiens OX=9606 GN=ATP6V0A2 PE=1 SV=2	680.944	0.709083	1.63477	0.124462	5.69718	1.21807e-08	1.58493e-07	575.314	525.936	449.234	850.14	877.042	808
Q9HC38-2	GLOD4	Isoform 2 of Glyoxalase domain-containing protein 4 OS=Homo sapiens OX=9606 GN=GLOD4	8554.41	0.70779	1.6333	0.090088	7.85665	3.94536e-15	1.09122e-13	6429.42	6169.64	6892.19	9505.74	11232.4	11097.1
P07339	CTSD	Cathepsin D OS=Homo sapiens OX=9606 GN=CTSD PE=1 SV=1	7429.48	0.705798	1.63105	0.116123	6.07804	1.21662e-09	1.80007e-08	4876.83	5550.27	6515.86	9251.11	9289.38	9093.43
D6RFG8	DCK	Deoxycytidine kinase OS=Homo sapiens OX=9606 GN=DCK PE=1 SV=1	1569.95	0.704772	1.62989	0.0468584	15.0404	3.98895e-51	6.2729e-49	1196.35	1203.1	1182.19	1926.51	1965.82	1945.73
P48426	PIP4K2A	Phosphatidylinositol 5-phosphate 4-kinase type-2 alpha OS=Homo sapiens OX=9606 GN=PIP4K2A PE=1 SV=2	4929.61	0.693628	1.61735	0.0469751	14.7659	2.43212e-49	3.61795e-47	3879.56	3779.81	3641.16	6314.17	5985.68	5977.31
Q9UL03	INTS6	Integrator complex subunit 6 OS=Homo sapiens OX=9606 GN=INTS6 PE=1 SV=1	1236.41	0.69162	1.6151	0.0907442	7.62164	2.50473e-14	6.41212e-13	920.121	873.671	1043.29	1557.24	1498.76	1525.4
O75381	PEX14	Peroxisomal membrane protein PEX14 OS=Homo sapiens OX=9606 GN=PEX14 PE=1 SV=1	1358.5	0.686404	1.60927	0.113613	6.04158	1.52615e-09	2.23998e-08	1176.35	1016.23	930.978	1591.73	1734.36	1701.33
Q8N9N2	ASCC1	Activating signal cointegrator 1 complex subunit 1 OS=Homo sapiens OX=9606 GN=ASCC1 PE=1 SV=1	2482.32	0.685174	1.6079	0.271551	2.52319	0.0116295	0.0382513	1504.96	1445.84	2760.42	3017.08	3043.18	3122.44
Q86UK7	ZNF598	E3 ubiquitin-protein ligase ZNF598 OS=Homo sapiens OX=9606 GN=ZNF598 PE=1 SV=1	1813.64	0.684023	1.60661	0.0849172	8.05517	7.93662e-16	2.31128e-14	1369.7	1278.24	1527	2205.49	2252.28	2249.13
E7EX90	DCTN1	Dynactin subunit 1 OS=Homo sapiens OX=9606 GN=DCTN1 PE=1 SV=1	2961.13	0.681572	1.60389	0.0364459	18.7009	4.8676e-78	1.67446e-75	2255.54	2257.87	2310.2	3675.49	3664.89	3602.82
Q8TF05	PPP4R1	Serine/threonine-protein phosphatase 4 regulatory subunit 1 OS=Homo sapiens OX=9606 GN=PPP4R1 PE=1 SV=1	2409.95	0.68129	1.60357	0.0717005	9.50188	2.0613e-21	8.8636e-20	1855.48	1826.33	1871.81	2872.01	2822.1	3211.99
Q9H6Z4-2	RANBP3	Isoform 2 of Ran-binding protein 3 OS=Homo sapiens OX=9606 GN=RANBP3	698.22	0.680983	1.60323	0.136635	4.98395	6.23005e-07	6.38551e-06	554.359	522.083	532.973	996.226	822.032	761.648
Q16643	DBN1	Drebrin OS=Homo sapiens OX=9606 GN=DBN1 PE=1 SV=4	5963	0.678568	1.60055	0.0826451	8.21062	2.20041e-16	6.65444e-15	4811.11	4500.32	4446.04	6630.69	7677.49	7712.35
Q5SW79	CEP170	Centrosomal protein of 170 kDa OS=Homo sapiens OX=9606 GN=CEP170 PE=1 SV=1	1644.54	0.676958	1.59877	0.270688	2.50088	0.0123885	0.040086	868.686	1458.37	1469.86	1543.03	2284.46	2242.81
Q9GZX9	TWSG1	Twisted gastrulation protein homolog 1 OS=Homo sapiens OX=9606 GN=TWSG1 PE=1 SV=1	779.576	0.675383	1.59702	0.0655253	10.3072	6.5373e-25	3.52758e-23	601.984	600.107	598.978	950.574	978.758	947.057
P61289-2	PSME3	Isoform 2 of Proteasome activator complex subunit 3 OS=Homo sapiens OX=9606 GN=PSME3	5769.54	0.675151	1.59676	0.048408	13.9471	3.27659e-44	3.46815e-42	4572.03	4377.02	4382	7416.91	7002.84	6866.42
Q9NUQ6-3	SPATS2L	Isoform 3 of SPATS2-like protein OS=Homo sapiens OX=9606 GN=SPATS2L	4298.8	0.671872	1.59314	0.0297353	22.5951	4.84504e-113	2.42428e-110	3323.3	3335.75	3287.49	5308.81	5293.39	5244.1
Q5JWT2	MED23	Mediator of RNA polymerase II transcription subunit 23 OS=Homo sapiens OX=9606 GN=MED23 PE=1 SV=1	1280.84	0.669526	1.59055	0.195625	3.42249	0.0006205	0.00324642	959.174	838.994	1168.4	1390.86	1426.1	1901.49
Q9BYG3	NIFK	MKI67 FHA domain-interacting nucleolar phosphoprotein OS=Homo sapiens OX=9606 GN=NIFK PE=1 SV=1	3599.89	0.668824	1.58978	0.266903	2.50587	0.0122149	0.0395941	2238.39	2083.52	4018.48	4571.28	4445.41	4242.27
Q6XZF7	DNMBP	Dynamin-binding protein OS=Homo sapiens OX=9606 GN=DNMBP PE=1 SV=1	3110.7	0.667312	1.58811	0.0903634	7.38476	1.52732e-13	3.57718e-12	2482.23	2373.46	2355.52	3537.52	3671.12	4244.37
P41227	NAA10	N-alpha-acetyltransferase 10 OS=Homo sapiens OX=9606 GN=NAA10 PE=1 SV=1	5163.1	0.66644	1.58715	0.226305	2.94487	0.00323088	0.0132017	2799.42	4641.92	4532.73	5408.23	6376.98	7219.33
P53814-6	SMTN	Isoform B3 of Smoothelin OS=Homo sapiens OX=9606 GN=SMTN	2524.47	0.664637	1.58517	0.0539435	12.321	6.98342e-35	5.73683e-33	2034.55	1950.59	1873.78	3148.97	3135.55	3003.4
O75131	CPNE3	Copine-3 OS=Homo sapiens OX=9606 GN=CPNE3 PE=1 SV=1	13088	0.655045	1.57467	0.0273429	23.9567	7.8652e-127	5.41126e-124	10098.5	10293.3	10107.8	15690.1	16030.7	16307.5
Q9UBR2	CTSZ	Cathepsin Z OS=Homo sapiens OX=9606 GN=CTSZ PE=1 SV=1	2630.21	0.652149	1.57151	0.166624	3.91388	9.08236e-05	0.000600833	2131.71	1974.67	2030.42	2482.45	3549.68	3612.3
P55196-5	AFDN	Isoform 5 of Afadin OS=Homo sapiens OX=9606 GN=AFDN	2024.16	0.651147	1.57042	0.103019	6.32063	2.60501e-10	4.24201e-09	1644.98	1602.85	1476.76	2200.42	2670.57	2549.36
Q96B97	SH3KBP1	SH3 domain-containing kinase-binding protein 1 OS=Homo sapiens OX=9606 GN=SH3KBP1 PE=1 SV=2	3072.28	0.648328	1.56735	0.193778	3.34572	0.00082069	0.00412142	2332.69	2371.53	2475.71	2965.35	3460.42	4827.99
P30566	ADSL	Adenylosuccinate lyase OS=Homo sapiens OX=9606 GN=ADSL PE=1 SV=2	3811.88	0.645925	1.56474	0.111863	5.77425	7.72953e-09	1.03764e-07	2766.08	3160.44	2990.95	4048.82	5041.17	4863.8
O60493	SNX3	Sorting nexin-3 OS=Homo sapiens OX=9606 GN=SNX3 PE=1 SV=3	3119.49	0.645143	1.56389	0.0421331	15.312	6.35475e-53	1.02872e-50	2414.6	2478.45	2406.75	3691.72	3841.34	3884.09
Q14746	COG2	Conserved oligomeric Golgi complex subunit 2 OS=Homo sapiens OX=9606 GN=COG2 PE=1 SV=1	1696.81	0.644372	1.56306	0.192179	3.35299	0.000799444	0.00401839	1140.15	1134.71	1697.43	1931.58	2185.86	2091.11
Q5T5C7	SARS	Serine--tRNA ligase, cytoplasmic OS=Homo sapiens OX=9606 GN=SARS PE=1 SV=1	8262.38	0.642151	1.56065	0.0931554	6.89334	5.44986e-12	1.09876e-10	6370.36	6537.6	6451.83	8826.04	10899.2	10489.3
Q9UHD8	2021-09-09	Septin-9 OS=Homo sapiens OX=9606 GN=SEPT9 PE=1 SV=2	14989.9	0.6413	1.55973	0.192675	3.32839	0.000873482	0.00436662	9325.04	10432	15379.4	18435.3	18349.4	18018.3
Q9UBL3	ASH2L	Set1/Ash2 histone methyltransferase complex subunit ASH2 OS=Homo sapiens OX=9606 GN=ASH2L PE=1 SV=1	1996.67	0.641231	1.55966	0.135405	4.73564	2.18367e-06	2.04056e-05	1529.73	1472.81	1677.73	2267.38	2181.71	2850.65
H0YG86	FKBP4	Peptidyl-prolyl cis-trans isomerase FKBP4 (Fragment) OS=Homo sapiens OX=9606 GN=FKBP4 PE=4 SV=1	141.885	0.641046	1.55946	0.160797	3.98668	6.70035e-05	0.000457552	103.823	120.407	108.368	165.361	181.636	171.713
Q14315	FLNC	Filamin-C OS=Homo sapiens OX=9606 GN=FLNC PE=1 SV=3	32089.7	0.641036	1.55945	0.102015	6.28375	3.30497e-10	5.27262e-09	23285	23077.6	28864.3	39284	39749.2	38278.4
O14974	PPP1R12A	Protein phosphatase 1 regulatory subunit 12A OS=Homo sapiens OX=9606 GN=PPP1R12A PE=1 SV=1	9732.83	0.637133	1.55523	0.0683368	9.32342	1.12648e-20	4.59272e-19	7810.55	7693.51	7349.31	10902.7	12204.9	12436
P46013	MKI67	Proliferation marker protein Ki-67 OS=Homo sapiens OX=9606 GN=MKI67 PE=1 SV=2	30703.5	0.635913	1.55392	0.0759379	8.37412	5.56365e-17	1.78037e-15	22102.9	23577.6	26452.6	37259.1	37310.1	37518.8
Q02818	NUCB1	Nucleobindin-1 OS=Homo sapiens OX=9606 GN=NUCB1 PE=1 SV=4	4577.51	0.634825	1.55275	0.0474376	13.3823	7.67143e-41	7.67701e-39	3409.02	3680.59	3669.73	5499.53	5660.81	5545.39
Q9H0J9	PARP12	Protein mono-ADP-ribosyltransferase PARP12 OS=Homo sapiens OX=9606 GN=PARP12 PE=1 SV=1	983.519	0.634093	1.55196	0.0598294	10.5983	3.03297e-26	1.72098e-24	774.388	767.713	770.397	1215.36	1208.14	1165.12
Q5C9Z4	NOM1	Nucleolar MIF4G domain-containing protein 1 OS=Homo sapiens OX=9606 GN=NOM1 PE=1 SV=1	1530.33	0.632572	1.55033	0.140142	4.51381	6.3674e-06	5.44195e-05	982.987	1346.63	1270.86	1911.29	1831.93	1838.28
C9JIZ6	PSAP	Prosaposin OS=Homo sapiens OX=9606 GN=PSAP PE=1 SV=2	18416.7	0.630411	1.54801	0.0607985	10.3689	3.43557e-25	1.87222e-23	14772.4	13807.3	14787.3	21051.6	22512.5	23569
Q96BN8	OTULIN	Ubiquitin thioesterase otulin OS=Homo sapiens OX=9606 GN=OTULIN PE=1 SV=3	1358.67	0.629824	1.54738	0.0551159	11.4273	3.05573e-30	2.07639e-28	1106.81	1051.87	1041.32	1673.9	1633.68	1644.44
Q6ZV73	FGD6	FYVE, RhoGEF and PH domain-containing protein 6 OS=Homo sapiens OX=9606 GN=FGD6 PE=1 SV=2	186.248	0.623776	1.5409	0.135628	4.59917	4.24176e-06	3.75952e-05	152.401	140.635	146.789	231.303	231.456	214.905
O15144	ARPC2	Actin-related protein 2/3 complex subunit 2 OS=Homo sapiens OX=9606 GN=ARPC2 PE=1 SV=1	6198.06	0.62373	1.54085	0.204736	3.04651	0.00231513	0.00996276	3979.57	5498.25	5158.31	5726.78	7974.33	8851.13
Q96BK5	PINX1	PIN2/TERF1-interacting telomerase inhibitor 1 OS=Homo sapiens OX=9606 GN=PINX1 PE=1 SV=2	570.213	0.62263	1.53968	0.0862979	7.21489	5.39778e-13	1.18837e-11	481.016	434.427	431.501	686.808	695.406	692.12
Q96KB5	PBK	Lymphokine-activated killer T-cell-originated protein kinase OS=Homo sapiens OX=9606 GN=PBK PE=1 SV=3	3940.65	0.622107	1.53912	0.0669735	9.28885	1.55965e-20	6.22052e-19	3133.75	3084.34	3093.41	4398.82	4961.25	4972.31
P45983-4	MAPK8	Isoform 4 of Mitogen-activated protein kinase 8 OS=Homo sapiens OX=9606 GN=MAPK8	632.762	0.619529	1.53637	0.0877093	7.06343	1.62439e-12	3.41246e-11	531.499	482.59	482.729	799.416	759.757	740.579
P46109	CRKL	Crk-like protein OS=Homo sapiens OX=9606 GN=CRKL PE=1 SV=1	1258.38	0.618966	1.53577	0.234177	2.64316	0.00821373	0.0287951	834.396	846.7	1296.47	1253.91	1662.75	1656.03
Q9GZR7	DDX24	ATP-dependent RNA helicase DDX24 OS=Homo sapiens OX=9606 GN=DDX24 PE=1 SV=1	6246.37	0.615631	1.53223	0.255331	2.41111	0.0159041	0.0492607	4326.28	5331.61	5142.55	4812.73	8969.7	8895.38
Q9UNM6	PSMD13	26S proteasome non-ATPase regulatory subunit 13 OS=Homo sapiens OX=9606 GN=PSMD13 PE=1 SV=2	12114.7	0.613163	1.52961	0.0488712	12.5465	4.15407e-36	3.5725e-34	9544.11	9555.48	9634.88	13967.5	14536.1	15450
Q00688	FKBP3	Peptidyl-prolyl cis-trans isomerase FKBP3 OS=Homo sapiens OX=9606 GN=FKBP3 PE=1 SV=1	7806.39	0.610872	1.52718	0.0936747	6.52121	6.97423e-11	1.20333e-09	6478.95	6259.22	5795.71	10294	9531.21	8479.26
Q96AG4	LRRC59	Leucine-rich repeat-containing protein 59 OS=Homo sapiens OX=9606 GN=LRRC59 PE=1 SV=1	15961.4	0.610467	1.52675	0.188905	3.2316	0.001231	0.00585602	13075.1	12581.1	12245.6	13859.9	21892.8	22114.1
Q2NKX8	ERCC6L	DNA excision repair protein ERCC-6-like OS=Homo sapiens OX=9606 GN=ERCC6L PE=1 SV=1	573.511	0.605889	1.52192	0.100603	6.0226	1.71641e-09	2.49264e-08	465.776	464.288	434.456	734.489	706.823	635.234
P49756	RBM25	RNA-binding protein 25 OS=Homo sapiens OX=9606 GN=RBM25 PE=1 SV=3	3906.75	0.605816	1.52184	0.0611075	9.91393	3.6212e-23	1.7182e-21	3315.68	3035.21	2943.66	4656.49	4792.07	4697.36
P00492	HPRT1	Hypoxanthine-guanine phosphoribosyltransferase OS=Homo sapiens OX=9606 GN=HPRT1 PE=1 SV=2	2248.37	0.599827	1.51554	0.0601803	9.96717	2.12185e-23	1.05213e-21	1889.77	1739.64	1732.9	2628.54	2721.42	2777.96
Q9NZN5	ARHGEF12	Rho guanine nucleotide exchange factor 12 OS=Homo sapiens OX=9606 GN=ARHGEF12 PE=1 SV=1	917.356	0.597761	1.51337	0.0761607	7.84868	4.20441e-15	1.15705e-13	746.765	688.726	754.634	1150.43	1070.09	1093.49
Q9BY44	EIF2A	Eukaryotic translation initiation factor 2A OS=Homo sapiens OX=9606 GN=EIF2A PE=1 SV=3	2955.68	0.595612	1.51111	0.199774	2.98143	0.00286904	0.0119359	2238.39	2014.16	2809.68	2775.64	3904.65	3991.54
Q9BW04	SARG	Specifically androgen-regulated gene protein OS=Homo sapiens OX=9606 GN=SARG PE=1 SV=2	694.135	0.591762	1.50709	0.0724207	8.17117	3.05424e-16	9.08676e-15	549.596	540.385	571.394	851.155	813.729	838.551
O75223	GGCT	Gamma-glutamylcyclotransferase OS=Homo sapiens OX=9606 GN=GGCT PE=1 SV=1	4572.67	0.590818	1.5061	0.223932	2.63839	0.00833019	0.0290922	3851.94	3617.02	3478.61	4760.99	4267.92	7459.52
G0XQ39	STIM1	STIM1L OS=Homo sapiens OX=9606 GN=STIM1 PE=1 SV=1	866.401	0.590711	1.50599	0.168946	3.49646	0.000471483	0.00257445	654.372	721.477	698.48	988.11	873.928	1262.04
P22626	HNRNPA2B1	Heterogeneous nuclear ribonucleoproteins A2/B1 OS=Homo sapiens OX=9606 GN=HNRNPA2B1 PE=1 SV=2	34482.6	0.590161	1.50541	0.180682	3.26629	0.00108965	0.00527014	24674.7	22957.2	34947.6	36559.1	43561.5	44195.6
Q9UJF2-2	RASAL2	Isoform 2 of Ras GTPase-activating protein nGAP OS=Homo sapiens OX=9606 GN=RASAL2	183.976	0.589698	1.50493	0.234736	2.51218	0.0119988	0.0391939	108.586	164.716	167.478	226.231	233.532	203.317
Q13243	SRSF5	Serine/arginine-rich splicing factor 5 OS=Homo sapiens OX=9606 GN=SRSF5 PE=1 SV=1	1178.23	0.589143	1.50435	0.0590274	9.98084	1.84903e-23	9.25187e-22	971.557	903.532	947.726	1427.38	1399.12	1420.06
Q9NQW6	ANLN	Anillin OS=Homo sapiens OX=9606 GN=ANLN PE=1 SV=2	4169.75	0.584215	1.49922	0.0675133	8.65333	5.00169e-18	1.7314e-16	3324.25	3254.83	3431.32	4842.15	4776.5	5389.48
Q8TD16-2	BICD2	Isoform 2 of Protein bicaudal D homolog 2 OS=Homo sapiens OX=9606 GN=BICD2	1050.2	0.582396	1.49733	0.190688	3.05418	0.00225677	0.00977948	626.749	948.805	947.726	1232.6	1255.88	1289.43
Q9BVC4	MLST8	Target of rapamycin complex subunit LST8 OS=Homo sapiens OX=9606 GN=MLST8 PE=1 SV=1	59.0941	-0.5855	0.666418	0.234895	-2.49261	0.012681	0.0408164	65.7229	74.1705	72.902	48.6954	45.6684	47.4055
P16403	HIST1H1C	Histone H1.2 OS=Homo sapiens OX=9606 GN=HIST1H1C PE=1 SV=2	4059.31	-0.588381	0.665089	0.204809	-2.87282	0.00406823	0.0160796	4992.09	5827.68	3807.65	3862.15	3125.17	2741.09
P18084	ITGB5	Integrin beta-5 OS=Homo sapiens OX=9606 GN=ITGB5 PE=1 SV=1	612.242	-0.590783	0.663982	0.240376	-2.45774	0.0139812	0.0442766	512.448	788.905	906.349	488.983	478.481	498.284
Q13825	AUH	Methylglutaconyl-CoA hydratase, mitochondrial OS=Homo sapiens OX=9606 GN=AUH PE=1 SV=1	2008.62	-0.591914	0.663462	0.13327	-4.44145	8.93546e-06	7.47428e-05	2000.26	2610.42	2634.32	1544.05	1612.93	1649.71
Q99523	SORT1	Sortilin OS=Homo sapiens OX=9606 GN=SORT1 PE=1 SV=3	121.108	-0.592513	0.663187	0.162354	-3.64951	0.000262737	0.00153189	148.591	144.488	143.834	97.3907	99.6402	92.7041
Q15043	SLC39A14	Zinc transporter ZIP14 OS=Homo sapiens OX=9606 GN=SLC39A14 PE=1 SV=3	1084.73	-0.593734	0.662626	0.0768751	-7.72335	1.13308e-14	3.01278e-13	1365.89	1251.27	1297.46	880.575	898.838	814.321
P01137	TGFB1	Transforming growth factor beta-1 proprotein OS=Homo sapiens OX=9606 GN=TGFB1 PE=1 SV=2	163.037	-0.595482	0.661823	0.217032	-2.74375	0.00607412	0.0225283	179.071	223.475	186.196	145.072	140.119	104.292
P24390	KDELR1	ER lumen protein-retaining receptor 1 OS=Homo sapiens OX=9606 GN=KDELR1 PE=1 SV=1	2431.41	-0.59808	0.660632	0.0416824	-14.3485	1.08848e-46	1.30238e-44	2878.47	2953.34	2953.52	1968.1	1941.95	1893.06
P43003	SLC1A3	Excitatory amino acid transporter 1 OS=Homo sapiens OX=9606 GN=SLC1A3 PE=1 SV=1	142.232	-0.60694	0.656588	0.160138	-3.7901	0.000150584	0.000937571	176.214	168.569	170.433	117.68	119.361	101.132
Q9NXR5	ANKRD10	Ankyrin repeat domain-containing protein 10 OS=Homo sapiens OX=9606 GN=ANKRD10 PE=1 SV=2	116.319	-0.608511	0.655873	0.167942	-3.62335	0.000290813	0.00168134	140.018	145.451	135.952	89.2748	90.299	96.9179
Q96G01	BICD1	Protein bicaudal D homolog 1 OS=Homo sapiens OX=9606 GN=BICD1 PE=1 SV=3	190.813	-0.610566	0.65494	0.176414	-3.46098	0.000538208	0.00287881	197.169	251.409	243.335	159.274	155.688	138.003
Q9BSJ2-4	TUBGCP2	Isoform 3 of Gamma-tubulin complex component 2 OS=Homo sapiens OX=9606 GN=TUBGCP2	269.791	-0.612049	0.654267	0.181921	-3.36436	0.000767219	0.0038848	270.512	354.477	353.673	225.216	224.191	190.675
Q5SRD1	TIMM23B	Putative mitochondrial import inner membrane translocase subunit Tim23B OS=Homo sapiens OX=9606 GN=TIMM23B PE=5 SV=2	769.568	-0.619062	0.651094	0.22576	-2.74213	0.00610423	0.0226095	675.327	1030.68	1090.57	535.649	636.244	648.929
Q14699	RFTN1	Raftlin OS=Homo sapiens OX=9606 GN=RFTN1 PE=1 SV=4	471.135	-0.622465	0.64956	0.253812	-2.45246	0.0141882	0.0447004	388.623	645.38	679.762	388.548	370.537	353.961
Q9NRP2	CMC2	COX assembly mitochondrial protein 2 homolog OS=Homo sapiens OX=9606 GN=CMC2 PE=1 SV=1	176.096	-0.622716	0.649447	0.211175	-2.94881	0.00318997	0.0130929	170.499	251.409	218.706	141.014	141.157	133.789
P00747	PLG	Plasminogen OS=Homo sapiens OX=9606 GN=PLG PE=1 SV=2	2584.6	-0.627779	0.647172	0.144776	-4.33621	1.44957e-05	0.000115296	3492.84	3167.18	2754.51	1857.53	2350.89	1884.63
Q4KMQ1	TPRN	Taperin OS=Homo sapiens OX=9606 GN=TPRN PE=1 SV=2	121.032	-0.633921	0.644422	0.183947	-3.44621	0.000568501	0.00301158	162.879	133.892	144.819	98.4052	88.2231	97.9714
Q5VVQ6	YOD1	Ubiquitin thioesterase OTU1 OS=Homo sapiens OX=9606 GN=YOD1 PE=1 SV=1	215.841	-0.644016	0.639929	0.25784	-2.49774	0.012499	0.0403956	184.786	300.535	304.415	163.332	167.105	174.874
P33908	MAN1A1	Mannosyl-oligosaccharide 1,2-alpha-mannosidase IA OS=Homo sapiens OX=9606 GN=MAN1A1 PE=1 SV=3	2747.62	-0.64447	0.639728	0.0387407	-16.6355	3.85723e-62	8.49207e-60	3374.73	3381.98	3297.34	2165.93	2159.91	2105.86
Q9NZR1	TMOD2	Tropomodulin-2 OS=Homo sapiens OX=9606 GN=TMOD2 PE=1 SV=1	6112.22	-0.646346	0.638897	0.247833	-2.60799	0.00910754	0.0312243	10171.8	6200.46	6004.56	5438.66	4973.71	3884.09
Q9BUT1	BDH2	3-hydroxybutyrate dehydrogenase type 2 OS=Homo sapiens OX=9606 GN=BDH2 PE=1 SV=2	229.823	-0.648269	0.638045	0.18843	-3.44038	0.000580908	0.00306844	284.799	278.38	278.801	211.013	182.674	143.27
P02792	FTL	Ferritin light chain OS=Homo sapiens OX=9606 GN=FTL PE=1 SV=2	164.295	-0.648594	0.637902	0.181886	-3.56593	0.000362564	0.00204882	170.499	219.622	211.81	129.854	133.892	120.094
P25116	F2R	Proteinase-activated receptor 1 OS=Homo sapiens OX=9606 GN=F2R PE=1 SV=2	62.4873	-0.650246	0.637172	0.228317	-2.84799	0.00439962	0.0171741	78.1055	79.9501	70.9317	48.6954	48.7822	48.459
Q6PCE3	PGM2L1	Glucose 1,6-bisphosphate synthase OS=Homo sapiens OX=9606 GN=PGM2L1 PE=1 SV=3	296.371	-0.657552	0.633953	0.11477	-5.72928	1.0086e-08	1.32807e-07	360.047	374.706	353.673	244.491	231.456	213.851
P23142	FBLN1	Fibulin-1 OS=Homo sapiens OX=9606 GN=FBLN1 PE=1 SV=4	2563.44	-0.661538	0.632204	0.133174	-4.96745	6.78391e-07	6.92739e-06	2999.44	3169.1	3254.98	2192.31	2126.7	1638.12
Q92576	PHF3	PHD finger protein 3 OS=Homo sapiens OX=9606 GN=PHF3 PE=1 SV=3	1167.84	-0.663979	0.631135	0.221409	-2.99888	0.00270976	0.0113851	1019.18	1513.27	1763.44	931.299	879.118	900.704
A0A286YF11	MICU1	Calcium uptake protein 1, mitochondrial OS=Homo sapiens OX=9606 GN=MICU1 PE=1 SV=1	1708.73	-0.668597	0.629118	0.178831	-3.73871	0.000184971	0.00112247	1596.4	2266.54	2430.39	1338.11	1340.99	1279.95
Q6FI81	CIAPIN1	Anamorsin OS=Homo sapiens OX=9606 GN=CIAPIN1 PE=1 SV=2	3890.61	-0.671212	0.627979	0.206178	-3.2555	0.00113192	0.00543165	3395.69	5098.5	5844.97	3025.2	2962.22	3017.1
O75084	FZD7	Frizzled-7 OS=Homo sapiens OX=9606 GN=FZD7 PE=1 SV=2	161.69	-0.67516	0.626263	0.145787	-4.63115	3.63635e-06	3.28106e-05	203.836	187.834	204.914	125.796	127.664	120.094
Q9UPY5	SLC7A11	Cystine/glutamate transporter OS=Homo sapiens OX=9606 GN=SLC7A11 PE=1 SV=1	521.413	-0.687631	0.620873	0.0828987	-8.29483	1.0874e-16	3.40058e-15	660.087	643.453	626.563	400.722	409.978	387.672
Q9BTA9	WAC	WW domain-containing adapter protein with coiled-coil OS=Homo sapiens OX=9606 GN=WAC PE=1 SV=3	167.135	-0.696509	0.617063	0.20049	-3.47404	0.000512685	0.00276561	175.261	230.218	214.765	133.912	138.043	110.613
P02042	HBD	Hemoglobin subunit delta OS=Homo sapiens OX=9606 GN=HBD PE=1 SV=2	2116.62	-0.698395	0.616257	0.0633289	-11.0281	2.79816e-28	1.75012e-26	2486.99	2670.14	2700.33	1553.18	1678.32	1610.73
Q13137-4	CALCOCO2	Isoform 4 of Calcium-binding and coiled-coil domain-containing protein 2 OS=Homo sapiens OX=9606 GN=CALCOCO2	1897.08	-0.711445	0.610708	0.202676	-3.51026	0.000447668	0.00245905	1703.08	2573.81	2789.98	1477.09	1443.75	1394.78
Q9NP58	ABCB6	ATP-binding cassette sub-family B member 6, mitochondrial OS=Homo sapiens OX=9606 GN=ABCB6 PE=1 SV=1	329.157	-0.728023	0.603731	0.124618	-5.84202	5.15716e-09	7.16794e-08	370.525	437.317	423.62	238.404	250.139	254.936
Q70HW3	SLC25A26	S-adenosylmethionine mitochondrial carrier protein OS=Homo sapiens OX=9606 GN=SLC25A26 PE=1 SV=2	316.119	-0.738005	0.599568	0.137635	-5.36203	8.22933e-08	9.69898e-07	352.427	434.427	398.991	238.404	247.025	225.439
Q13772-4	NCOA4	Isoform 4 of Nuclear receptor coactivator 4 OS=Homo sapiens OX=9606 GN=NCOA4	94.5343	-0.740844	0.598389	0.196253	-3.77495	0.00016004	0.000987513	123.826	110.774	120.19	63.9127	72.6543	75.8488
Q5M9N0	CCDC158	Coiled-coil domain-containing protein 158 OS=Homo sapiens OX=9606 GN=CCDC158 PE=2 SV=2	84.4833	-0.744711	0.596787	0.227009	-3.28054	0.00103609	0.00504902	88.5831	114.627	114.279	63.9127	61.2372	64.2608
Q8NBZ7-2	UXS1	Isoform 2 of UDP-glucuronic acid decarboxylase 1 OS=Homo sapiens OX=9606 GN=UXS1	2235.64	-0.750492	0.594401	0.185828	-4.03864	5.3763e-05	0.000376478	2109.8	2931.18	3372.21	1689.12	1656.52	1654.98
Q9Y426	C2CD2	C2 domain-containing protein 2 OS=Homo sapiens OX=9606 GN=C2CD2 PE=1 SV=2	597.072	-0.761308	0.589961	0.237379	-3.20715	0.00134059	0.00628501	538.166	786.015	929.008	406.809	448.381	474.055
H3BT17	NPW	Neuropeptide W OS=Homo sapiens OX=9606 GN=NPW PE=1 SV=2	192.996	-0.761395	0.589926	0.17663	-4.31068	1.62756e-05	0.000127608	212.409	273.564	242.35	145.072	130.778	153.805
O75845	SC5D	Lathosterol oxidase OS=Homo sapiens OX=9606 GN=SC5D PE=1 SV=2	1217.19	-0.767491	0.587438	0.142816	-5.37399	7.70119e-08	9.11556e-07	1375.42	1529.65	1695.46	846.082	819.956	1036.6
A0A087X0R0	KDM6A	Lysine-specific demethylase 6A OS=Homo sapiens OX=9606 GN=KDM6A PE=1 SV=1	304.492	-0.777469	0.583389	0.287226	-2.70682	0.00679317	0.0246308	249.557	436.354	467.952	218.115	219.001	235.974
Q9NPJ6	MED4	Mediator of RNA polymerase II transcription subunit 4 OS=Homo sapiens OX=9606 GN=MED4 PE=1 SV=1	250.396	-0.777524	0.583367	0.253468	-3.06754	0.00215826	0.00939797	231.459	338.102	379.287	162.318	185.788	205.424
Q8TDR2	STK35	Serine/threonine-protein kinase 35 OS=Homo sapiens OX=9606 GN=STK35 PE=1 SV=2	240.145	-0.792227	0.577452	0.227735	-3.47872	0.000503817	0.00272666	234.317	327.506	351.703	184.637	188.901	153.805
Q9H0N5	PCBD2	Pterin-4-alpha-carbinolamine dehydratase 2 OS=Homo sapiens OX=9606 GN=PCBD2 PE=1 SV=4	901.191	-0.798295	0.575028	0.258345	-3.09004	0.0020013	0.00880507	748.67	1304.25	1380.21	681.735	653.889	638.394
J3KNF8	CYB5B	Cytochrome b5 type B (Outer mitochondrial membrane), isoform CRA_a OS=Homo sapiens OX=9606 GN=CYB5B PE=1 SV=1	413.585	-0.809873	0.570432	0.253093	-3.1999	0.00137474	0.00642324	707.712	410.346	462.041	298.259	313.452	289.7
Q7Z7H8-2	MRPL10	Isoform 2 of 39S ribosomal protein L10, mitochondrial OS=Homo sapiens OX=9606 GN=MRPL10	830.343	-0.8138	0.568881	0.198803	-4.0935	4.24906e-05	0.000305586	794.39	1167.46	1213.72	564.055	606.145	636.287
Q9NQB0	TCF7L2	Transcription factor 7-like 2 OS=Homo sapiens OX=9606 GN=TCF7L2 PE=1 SV=2	965.042	-0.836608	0.559959	0.118535	-7.05789	1.69046e-12	3.53775e-11	1074.43	1289.8	1347.7	703.039	668.42	706.869
A0A0A0MRJ7	F5	Coagulation factor V OS=Homo sapiens OX=9606 GN=F5 PE=1 SV=1	5106.24	-0.840364	0.558503	0.173137	-4.85375	1.21148e-06	1.18647e-05	5096.86	7637.64	6923.72	3270.71	3916.07	3792.44
A0A0C4DFM7	TUT4	Terminal uridylyltransferase 4 OS=Homo sapiens OX=9606 GN=TUT4 PE=1 SV=1	427.397	-0.850176	0.554717	0.266327	-3.19222	0.00141182	0.00655198	367.667	601.07	680.747	305.361	309.3	300.235
P02649	APOE	Apolipoprotein E OS=Homo sapiens OX=9606 GN=APOE PE=1 SV=1	5826.91	-0.856832	0.552164	0.136592	-6.27294	3.54294e-10	5.55565e-09	8930.7	7001.89	6591.72	4438.38	4020.9	3977.85
Q99715	COL12A1	Collagen alpha-1(XII) chain OS=Homo sapiens OX=9606 GN=COL12A1 PE=1 SV=2	1856.08	-0.856949	0.552119	0.253682	-3.37804	0.000730045	0.00372397	1595.45	2658.58	2921.01	1199.12	1254.84	1507.49
P10589	NR2F1	COUP transcription factor 1 OS=Homo sapiens OX=9606 GN=NR2F1 PE=1 SV=1	126.184	-0.868462	0.54773	0.16623	-5.22445	1.74677e-07	1.96209e-06	164.784	157.974	166.492	96.3763	86.1473	85.3299
Q9H8E8	KAT14	Cysteine-rich protein 2-binding protein OS=Homo sapiens OX=9606 GN=KAT14 PE=1 SV=3	95.9606	-0.877482	0.544317	0.243635	-3.60163	0.000316231	0.00180929	99.0607	132.929	140.878	64.9272	72.6543	65.3142
P09848	LCT	Lactase-phlorizin hydrolase OS=Homo sapiens OX=9606 GN=LCT PE=1 SV=3	501.266	-0.911218	0.531736	0.273927	-3.3265	0.00087943	0.00439099	427.675	735.926	799.952	329.708	345.627	368.709
Q86WJ1	CHD1L	Chromodomain-helicase-DNA-binding protein 1-like OS=Homo sapiens OX=9606 GN=CHD1L PE=1 SV=3	200.505	-0.913636	0.530845	0.248832	-3.67169	0.000240947	0.00141612	189.549	288.013	308.356	137.97	142.195	136.949
O00767	SCD	Acyl-CoA desaturase OS=Homo sapiens OX=9606 GN=SCD PE=1 SV=2	7185.65	-0.921853	0.527831	0.1119	-8.23821	1.74803e-16	5.3451e-15	10274.7	9540.06	8404.42	5478.23	4879.26	4537.23
Q658P3-2	STEAP3	Isoform 2 of Metalloreductase STEAP3 OS=Homo sapiens OX=9606 GN=STEAP3	115.317	-0.922239	0.527689	0.193045	-4.77732	1.77643e-06	1.68287e-05	161.926	158.937	132.012	80.1445	83.0335	75.8488
Q13017	ARHGAP5	Rho GTPase-activating protein 5 OS=Homo sapiens OX=9606 GN=ARHGAP5 PE=1 SV=2	453.348	-0.982919	0.505955	0.344355	-2.85438	0.00431209	0.0168758	335.282	686.8	784.189	306.375	308.262	299.181
E9PLM6	MDK	Midkine OS=Homo sapiens OX=9606 GN=MDK PE=1 SV=1	2724.05	-0.988772	0.503907	0.281431	-3.51337	0.000442465	0.0024329	2651.78	2904.21	5311.99	1777.38	1881.75	1817.21
B5MBX0	CDCA5	Sororin OS=Homo sapiens OX=9606 GN=CDCA5 PE=1 SV=1	636.733	-0.989276	0.50373	0.259562	-3.81133	0.000138221	0.000872442	567.694	921.834	1051.17	450.432	408.94	420.329
Q8NEG5	ZSWIM2	E3 ubiquitin-protein ligase ZSWIM2 OS=Homo sapiens OX=9606 GN=ZSWIM2 PE=1 SV=2	535.702	-1.01926	0.493368	0.29342	-3.47374	0.000513265	0.00276561	446.726	808.17	897.483	351.012	369.499	341.32
Q15477	SKIV2L	Helicase SKI2W OS=Homo sapiens OX=9606 GN=SKIV2L PE=1 SV=3	119.392	-1.02714	0.490682	0.294574	-3.48686	0.000488729	0.00265319	112.396	183.018	185.21	84.2024	81.9956	69.5281
O75443	TECTA	Alpha-tectorin OS=Homo sapiens OX=9606 GN=TECTA PE=1 SV=3	274.785	-1.0411	0.485958	0.295548	-3.52259	0.000427344	0.0023663	239.079	406.493	464.011	181.593	183.712	173.82
A0A3B3IU65	MIF4GD	MIF4G domain-containing protein OS=Homo sapiens OX=9606 GN=MIF4GD PE=1 SV=1	201.236	-1.0448	0.484714	0.30441	-3.4322	0.000598702	0.00314733	180.976	354.477	277.816	134.927	135.967	123.254
Q96QD8	SLC38A2	Sodium-coupled neutral amino acid transporter 2 OS=Homo sapiens OX=9606 GN=SLC38A2 PE=1 SV=2	2689.02	-1.0664	0.477507	0.0726827	-14.6721	9.7335e-49	1.33891e-46	3559.52	3558.26	3801.74	1635.35	1713.6	1865.67
Q4U2R6	MRPL51	39S ribosomal protein L51, mitochondrial OS=Homo sapiens OX=9606 GN=MRPL51 PE=1 SV=1	631.985	-1.09056	0.469578	0.293058	-3.72132	0.000198185	0.00118953	531.499	966.143	1082.69	417.969	398.561	395.046
P78310	CXADR	Coxsackievirus and adenovirus receptor OS=Homo sapiens OX=9606 GN=CXADR PE=1 SV=1	155.943	-1.09119	0.469374	0.282353	-3.86464	0.000111255	0.000720348	152.401	227.328	257.127	112.608	88.2231	97.9714
Q9NWY4	HPF1	Histone PARylation factor 1 OS=Homo sapiens OX=9606 GN=HPF1 PE=1 SV=2	520.726	-1.12121	0.459708	0.327959	-3.41875	0.000629094	0.00328202	409.578	825.508	905.364	341.882	320.717	321.304
Q9H8M2	BRD9	Bromodomain-containing protein 9 OS=Homo sapiens OX=9606 GN=BRD9 PE=1 SV=2	1222.9	-1.16803	0.445029	0.14154	-8.25229	1.55391e-16	4.80491e-15	1968.83	1662.58	1446.22	764.923	774.288	720.564
O14684	PTGES	Prostaglandin E synthase OS=Homo sapiens OX=9606 GN=PTGES PE=1 SV=2	686.706	-1.16968	0.444519	0.313398	-3.73226	0.000189773	0.00114563	561.979	1044.17	1246.23	427.099	415.168	425.596
Q02556	IRF8	Interferon regulatory factor 8 OS=Homo sapiens OX=9606 GN=IRF8 PE=1 SV=2	188.336	-1.18637	0.439406	0.342559	-3.46327	0.000533654	0.00285723	159.069	284.16	341.851	108.55	113.133	123.254
Q4G0M1	ERFE	Erythroferrone OS=Homo sapiens OX=9606 GN=ERFE PE=2 SV=2	212.933	-1.24602	0.42161	0.336652	-3.7012	0.000214579	0.00127405	182.881	318.837	397.02	124.782	127.664	126.415
Q15361	TTF1	Transcription termination factor 1 OS=Homo sapiens OX=9606 GN=TTF1 PE=1 SV=3	276.119	-1.25429	0.419199	0.355259	-3.53065	0.000414535	0.00231165	219.076	449.839	498.492	171.448	159.84	158.018
Q9Y240	CLEC11A	C-type lectin domain family 11 member A OS=Homo sapiens OX=9606 GN=CLEC11A PE=1 SV=1	88.4777	-1.27445	0.413381	0.231632	-5.50207	3.75362e-08	4.6219e-07	110.491	123.296	141.863	50.7243	57.0856	47.4055
P48735	IDH2	Isocitrate dehydrogenase [NADP], mitochondrial OS=Homo sapiens OX=9606 GN=IDH2 PE=1 SV=2	1130.61	-1.27599	0.412942	0.318388	-4.00765	6.13265e-05	0.000422984	913.454	1808.03	2079.68	710.141	647.662	624.699
Q8NBP7	PCSK9	Proprotein convertase subtilisin/kexin type 9 OS=Homo sapiens OX=9606 GN=PCSK9 PE=1 SV=3	118.835	-1.27898	0.412088	0.177999	-7.18529	6.70666e-13	1.45329e-11	156.211	173.386	175.359	68.9851	69.5406	69.5281
Q5VZ89-7	DENND4C	Isoform 2 of DENN domain-containing protein 4C OS=Homo sapiens OX=9606 GN=DENND4C	129.826	-1.2841	0.410626	0.374512	-3.42873	0.000606412	0.00317875	106.681	205.173	240.38	75.072	73.6923	77.9557
Q12894-2	IFRD2	Isoform 2 of Interferon-related developmental regulator 2 OS=Homo sapiens OX=9606 GN=IFRD2	938.992	-1.32118	0.400209	0.355948	-3.71171	0.000205861	0.00122625	698.187	1533.5	1792.01	547.823	526.225	536.209
Q9Y619	SLC25A15	Mitochondrial ornithine transporter 1 OS=Homo sapiens OX=9606 GN=SLC25A15 PE=1 SV=1	555.681	-1.37296	0.386097	0.338279	-4.05867	4.93529e-05	0.00034692	452.441	892.936	1060.03	298.259	321.755	308.662
P04004	VTN	Vitronectin OS=Homo sapiens OX=9606 GN=VTN PE=1 SV=1	2174.15	-1.48778	0.35656	0.16535	-8.99776	2.30363e-19	8.68438e-18	3167.08	3250.02	3198.82	883.618	1323.35	1222.01
Q8N9N5	BANP	Protein BANP OS=Homo sapiens OX=9606 GN=BANP PE=1 SV=3	620.895	-1.53801	0.344361	0.351163	-4.37975	1.18814e-05	9.70259e-05	499.113	1115.45	1156.58	309.419	345.627	299.181
Q9UFW8	CGGBP1	CGG triplet repeat-binding protein 1 OS=Homo sapiens OX=9606 GN=CGGBP1 PE=1 SV=2	1449.4	-1.54644	0.342354	0.330938	-4.67291	2.96969e-06	2.71514e-05	1176.35	2466.89	2835.3	767.967	750.416	699.494
P17097-2	ZNF7	Isoform 2 of Zinc finger protein 7 OS=Homo sapiens OX=9606 GN=ZNF7	628.625	-1.59886	0.330138	0.399132	-4.00584	6.17972e-05	0.000425697	455.298	1074.03	1306.32	333.766	297.883	304.449
Q7Z5P4	HSD17B13	17-beta-hydroxysteroid dehydrogenase 13 OS=Homo sapiens OX=9606 GN=HSD17B13 PE=1 SV=1	4724.62	-1.6211	0.325087	0.323521	-5.0108	5.42041e-07	5.60788e-06	3799.55	8159.72	9433.91	2446.94	2330.13	2177.49
F6XAJ2	MUSK	Muscle, skeletal receptor tyrosine-protein kinase (Fragment) OS=Homo sapiens OX=9606 GN=MUSK PE=4 SV=2	667.232	-1.66087	0.316247	0.457623	-3.62935	0.000284132	0.00164787	441.963	1222.37	1377.26	413.911	275.049	272.845
A0A1B0GUN5	PLEKHA6	Pleckstrin homology domain-containing family A member 6 OS=Homo sapiens OX=9606 GN=PLEKHA6 PE=1 SV=1	492.725	-1.71365	0.304887	0.427479	-4.00874	6.10431e-05	0.000421557	348.617	828.398	1088.6	226.231	215.887	248.616
P04049-2	RAF1	Isoform 2 of RAF proto-oncogene serine/threonine-protein kinase OS=Homo sapiens OX=9606 GN=RAF1	1029.18	-1.81855	0.283506	0.427824	-4.25069	2.13113e-05	0.000162913	686.757	1886.05	2238.29	441.302	433.85	488.803
Q96L73	NSD1	Histone-lysine N-methyltransferase, H3 lysine-36 and H4 lysine-20 specific OS=Homo sapiens OX=9606 GN=NSD1 PE=1 SV=1	364.721	-1.83497	0.280297	0.397056	-4.62145	3.81069e-06	3.41041e-05	286.704	650.196	772.367	166.376	153.612	159.072
P98088	MUC5AC	Mucin-5AC OS=Homo sapiens OX=9606 GN=MUC5AC PE=1 SV=4	775.273	-1.9245	0.263431	0.411572	-4.67598	2.92548e-06	2.67917e-05	557.216	1445.84	1678.72	322.607	322.793	324.464
Q70EL4	USP43	Ubiquitin carboxyl-terminal hydrolase 43 OS=Homo sapiens OX=9606 GN=USP43 PE=1 SV=2	136.584	-1.93564	0.261405	0.460665	-4.20184	2.64757e-05	0.000200443	101.918	259.115	288.652	53.7678	59.1614	56.8866
Q7L591	DOK3	Docking protein 3 OS=Homo sapiens OX=9606 GN=DOK3 PE=1 SV=2	159.046	-1.98567	0.252496	0.485102	-4.09329	4.25289e-05	0.000305586	111.443	290.903	359.584	68.9851	63.3131	60.047
Q00722	PLCB2	1-phosphatidylinositol 4,5-bisphosphate phosphodiesterase beta-2 OS=Homo sapiens OX=9606 GN=PLCB2 PE=1 SV=2	423.665	-2.11847	0.230291	0.465157	-4.55432	5.25555e-06	4.56976e-05	286.704	810.096	969.399	172.463	145.309	158.018
Q6ZNJ1	NBEAL2	Neurobeachin-like protein 2 OS=Homo sapiens OX=9606 GN=NBEAL2 PE=1 SV=2	314.552	-2.13689	0.227369	0.411172	-5.19707	2.0245e-07	2.24654e-06	253.367	619.372	664.984	119.709	125.588	104.292
P37058	HSD17B3	Testosterone 17-beta-dehydrogenase 3 OS=Homo sapiens OX=9606 GN=HSD17B3 PE=1 SV=2	175.131	-2.17254	0.221819	0.496085	-4.37938	1.19018e-05	9.70484e-05	122.873	336.176	400.961	53.7678	66.4268	70.5815
Q86SQ6-1	ADGRA1	Isoform 1 of Adhesion G protein-coupled receptor A1 OS=Homo sapiens OX=9606 GN=ADGRA1	879.891	-2.18319	0.220188	0.409966	-5.3253	1.00785e-07	1.17526e-06	660.087	1652.94	2013.67	335.795	313.452	303.395
A0A1B0GVG4	CCDC194	Coiled-coil domain-containing protein 194 OS=Homo sapiens OX=9606 GN=CCDC194 PE=3 SV=1	108.153	-2.29809	0.203332	0.51584	-4.45505	8.38748e-06	7.06963e-05	78.1055	210.953	250.231	40.5795	32.1755	36.8709
Q92854	SEMA4D	Semaphorin-4D OS=Homo sapiens OX=9606 GN=SEMA4D PE=1 SV=1	986.796	-2.34537	0.196777	0.465746	-5.03573	4.76042e-07	4.96238e-06	633.417	1956.37	2357.49	307.39	330.058	336.052
Q00532-2	CDKL1	Isoform 2 of Cyclin-dependent kinase-like 1 OS=Homo sapiens OX=9606 GN=CDKL1	255.973	-2.49175	0.17779	0.532805	-4.67667	2.91572e-06	2.67469e-05	157.164	514.377	632.474	76.0865	81.9956	73.7419
Q9NXG0-2	CNTLN	Isoform 2 of Centlein OS=Homo sapiens OX=9606 GN=CNTLN	2194.46	-2.5872	0.166408	0.468937	-5.51716	3.44517e-08	4.26117e-07	1360.18	4388.58	5539.57	603.62	622.752	652.089
Q14872	MTF1	Metal regulatory transcription factor 1 OS=Homo sapiens OX=9606 GN=MTF1 PE=1 SV=2	689.993	-3.30195	0.101394	0.556583	-5.93254	2.98279e-09	4.19879e-08	375.288	1537.35	1846.19	122.753	122.474	135.896
Q70JA7	CHSY3	Chondroitin sulfate synthase 3 OS=Homo sapiens OX=9606 GN=CHSY3 PE=2 SV=3	95.6063	-4.07463	0.0593493	0.648372	-6.28439	3.29136e-10	5.26617e-09	63.8179	222.512	255.157	9.13038	10.3792	12.6415
Q8N884	CGAS	Cyclic GMP-AMP synthase OS=Homo sapiens OX=9606 GN=CGAS PE=1 SV=2	1105.01	-4.09037	0.058705	0.532306	-7.68425	1.539e-14	4.05295e-13	648.657	2627.76	2986.03	115.652	126.626	125.361

## Sheet: NETs-treated SW620 vs Control
Supplementary Table Quantitative proteomic analysis of NETs-treated CRC cell lines ( NETs-treated SW620 vs control, significant changed proteins )
Accession	Name	Description	baseMean	log2FoldChange	Fold Change	lfcSE	stat	pvalue	padj	Control-1	Control-2	Control-3	SW620-1	SW620-2	SW620-3
P51148-2	RAB5C	Isoform 2 of Ras-related protein Rab-5C OS=Homo sapiens OX=9606 GN=RAB5C	1505.58	6.18302	72.6567	0.299113	20.6712	6.2922e-95	5.06365e-92	37.1735	38.9452	46.5771	1945.38	3329.52	3635.86
P41223	BUD31	Protein BUD31 homolog OS=Homo sapiens OX=9606 GN=BUD31 PE=1 SV=2	598.401	3.47388	11.1107	0.475834	7.30062	2.86447e-13	6.90691e-12	97.223	109.047	90.1811	434.328	1434.27	1425.36
Q9NX00	TMEM160	Transmembrane protein 160 OS=Homo sapiens OX=9606 GN=TMEM160 PE=1 SV=1	464.131	3.28774	9.7658	0.190988	17.2143	2.07346e-66	6.06769e-64	86.7382	82.7586	89.1901	937.34	687.875	900.885
Q9H497	TOR3A	Torsin-3A OS=Homo sapiens OX=9606 GN=TOR3A PE=1 SV=1	173.348	3.24584	9.48628	1.21546	2.67047	0.0075746	0.0309032	34.314	30.1825	34.6851	37.3724	30.8004	872.733
Q9H6D7	HAUS4	HAUS augmin-like complex subunit 4 OS=Homo sapiens OX=9606 GN=HAUS4 PE=1 SV=1	232.321	3.15212	8.88959	0.261472	12.0553	1.81976e-33	1.52151e-31	49.5647	45.7606	45.5861	396.955	333.671	522.388
Q96PV6	LENG8	Leukocyte receptor cluster member 8 OS=Homo sapiens OX=9606 GN=LENG8 PE=1 SV=3	297.438	2.84897	7.20484	0.401214	7.10086	1.23984e-12	2.78121e-11	81.9723	71.075	64.4151	273.728	636.541	656.896
Q9Y5X2	SNX8	Sorting nexin-8 OS=Homo sapiens OX=9606 GN=SNX8 PE=1 SV=1	122.738	2.76777	6.81055	0.211964	13.0578	5.73964e-39	6.26302e-37	33.3608	30.1825	30.721	225.244	210.469	206.453
Q8N5I2	ARRDC1	Arrestin domain-containing protein 1 OS=Homo sapiens OX=9606 GN=ARRDC1 PE=1 SV=1	255.77	2.67285	6.37689	0.146657	18.2252	3.25583e-74	1.233e-71	70.5343	72.0486	65.4061	460.589	429.152	436.888
Q8WVT3	TRAPPC12	Trafficking protein particle complex subunit 12 OS=Homo sapiens OX=9606 GN=TRAPPC12 PE=1 SV=3	117.547	2.51656	5.72214	0.804972	3.12627	0.00177042	0.0092591	38.1267	34.0771	32.7031	31.312	283.364	285.697
B4E0Y9	STK26	Serine/threonine-protein kinase 26 OS=Homo sapiens OX=9606 GN=STK26 PE=1 SV=1	1103.56	2.48725	5.60708	0.250753	9.91911	3.43811e-23	1.84454e-21	316.451	336.876	348.833	1519.14	1526.67	2573.36
Q8IXM2-3	BAP18	Isoform 3 of Chromatin complexes subunit BAP18 OS=Homo sapiens OX=9606 GN=BAP18	759.521	2.47121	5.5451	0.136382	18.1198	2.22268e-73	7.94979e-71	217.322	262.88	216.038	1156.52	1361.38	1342.99
A0A2R8Y891	PFKM	ATP-dependent 6-phosphofructokinase OS=Homo sapiens OX=9606 GN=PFKM PE=1 SV=1	1018.73	2.41558	5.33534	0.679722	3.55378	0.000379742	0.00250233	374.594	302.799	287.39	307.06	2450.68	2389.85
Q00613	HSF1	Heat shock factor protein 1 OS=Homo sapiens OX=9606 GN=HSF1 PE=1 SV=1	467.798	2.41018	5.31541	0.688316	3.50156	0.000462542	0.00297487	57.19	64.2596	323.067	789.871	800.81	771.592
Q8N5M1	ATPAF2	ATP synthase mitochondrial F1 complex assembly factor 2 OS=Homo sapiens OX=9606 GN=ATPAF2 PE=1 SV=1	519.759	2.34024	5.06386	0.0984003	23.7828	5.02709e-125	1.61822e-121	176.336	174.28	163.515	846.434	868.571	889.416
Q5R372-5	RABGAP1L	Isoform 5 of Rab GTPase-activating protein 1-like OS=Homo sapiens OX=9606 GN=RABGAP1L	650.798	2.14175	4.41296	0.1582	13.5382	9.30616e-42	1.15217e-39	231.619	200.568	289.372	1063.6	1080.07	1039.56
Q9UHY7	ENOPH1	Enolase-phosphatase E1 OS=Homo sapiens OX=9606 GN=ENOPH1 PE=1 SV=1	866.655	2.12665	4.36703	0.688387	3.08933	0.00200611	0.0102502	361.25	327.14	280.453	247.466	1971.22	2012.39
Q9UMZ2-7	SYNRG	Isoform 6 of Synergin gamma OS=Homo sapiens OX=9606 GN=SYNRG	456.602	2.09041	4.25868	0.371526	5.62655	1.8385e-08	2.65983e-07	180.148	173.306	167.479	388.875	876.784	953.02
Q14191	WRN	Werner syndrome ATP-dependent helicase OS=Homo sapiens OX=9606 GN=WRN PE=1 SV=2	408.685	2.04473	4.12596	0.103428	19.7697	5.43486e-87	2.69151e-84	158.226	166.491	153.605	651.492	658.101	664.194
F5H5R8	NAT1	Arylamine N-acetyltransferase 1 OS=Homo sapiens OX=9606 GN=NAT1 PE=1 SV=1	678.275	2.0323	4.09057	0.275807	7.36857	1.72469e-13	4.25423e-12	256.402	280.405	262.615	701.995	1264.87	1303.36
Q9UGJ1	TUBGCP4	Gamma-tubulin complex component 4 OS=Homo sapiens OX=9606 GN=TUBGCP4 PE=1 SV=1	276.407	2.03096	4.08677	0.308788	6.57719	4.79419e-11	9.02486e-10	83.8787	83.7322	158.56	436.348	451.739	444.186
Q969T7	NT5C3B	7-methylguanosine phosphate-specific 5'-nucleotidase OS=Homo sapiens OX=9606 GN=NT5C3B PE=1 SV=4	160.77	1.9873	3.96494	0.177595	11.1901	4.55981e-29	3.0264e-27	73.3938	62.3123	58.4691	270.697	248.456	251.289
Q9GZZ1	NAA50	N-alpha-acetyltransferase 50 OS=Homo sapiens OX=9606 GN=NAA50 PE=1 SV=1	1635.82	1.91264	3.76496	0.306046	6.2495	4.11757e-10	7.24287e-09	705.343	681.541	672.89	1477.72	3247.39	3030.06
Q8TF32	ZNF431	Zinc finger protein 431 OS=Homo sapiens OX=9606 GN=ZNF431 PE=2 SV=2	200.332	1.86063	3.63166	0.62483	2.97781	0.00290312	0.0140212	93.4103	77.8904	88.1991	85.8555	430.179	426.461
Q12800-4	TFCP2	Isoform 4 of Alpha-globin transcription factor CP2 OS=Homo sapiens OX=9606 GN=TFCP2	1137.75	1.82318	3.5386	0.0827081	22.0435	1.10202e-107	1.41896e-104	533.773	516.024	453.879	1758.52	1780.26	1784.04
Q9NRA8-3	EIF4ENIF1	Isoform 3 of Eukaryotic translation initiation factor 4E transporter OS=Homo sapiens OX=9606 GN=EIF4ENIF1	473.731	1.80705	3.49926	0.240499	7.51375	5.74577e-14	1.49158e-12	223.041	203.489	205.137	561.596	695.062	954.063
Q5H9F3-3	BCORL1	Isoform 3 of BCL-6 corepressor-like protein 1 OS=Homo sapiens OX=9606 GN=BCORL1	128.875	1.76408	3.39658	0.186972	9.43503	3.90876e-21	1.83683e-19	64.8153	57.4442	53.5141	188.882	209.443	199.154
I3L0E3	hCG_1984214	HCG1984214, isoform CRA_a OS=Homo sapiens OX=9606 GN=hCG_1984214 PE=4 SV=1	626.364	1.72429	3.30417	0.364522	4.73028	2.24212e-06	2.4018e-05	295.482	284.3	293.336	498.972	1176.57	1209.52
Q9NPJ6	MED4	Mediator of RNA polymerase II transcription subunit 4 OS=Homo sapiens OX=9606 GN=MED4 PE=1 SV=1	629.748	1.72071	3.29599	0.543879	3.16378	0.00155735	0.0083136	181.102	175.253	523.249	547.455	1193	1158.43
C9JC87	AP4M1	AP-4 complex subunit mu-1 OS=Homo sapiens OX=9606 GN=AP4M1 PE=1 SV=1	586.995	1.71172	3.27551	0.0846642	20.2177	6.8351e-91	4.0004e-88	269.746	267.748	286.399	893.907	915.798	888.373
Q8WVJ2	NUDCD2	NudC domain-containing protein 2 OS=Homo sapiens OX=9606 GN=NUDCD2 PE=1 SV=1	1599.24	1.69894	3.24663	0.411988	4.12377	3.72728e-05	0.000314448	473.724	490.71	1295.24	2447.39	2456.84	2431.56
Q86YE8	ZNF573	Zinc finger protein 573 OS=Homo sapiens OX=9606 GN=ZNF573 PE=2 SV=4	132.037	1.68699	3.21985	0.172445	9.78281	1.33456e-22	6.71244e-21	59.0963	62.3123	66.3971	204.033	201.229	199.154
Q8WV44	TRIM41	E3 ubiquitin-protein ligase TRIM41 OS=Homo sapiens OX=9606 GN=TRIM41 PE=1 SV=3	92.0568	1.68037	3.20509	0.586895	2.86315	0.00419453	0.0190709	41.9393	43.8134	45.5861	48.4831	182.749	189.77
Q9H1J1	UPF3A	Regulator of nonsense transcripts 3A OS=Homo sapiens OX=9606 GN=UPF3A PE=1 SV=1	373.536	1.67011	3.18239	0.108276	15.4246	1.11922e-53	2.05872e-51	168.71	187.911	179.371	581.797	572.887	550.541
A0A3B3IT47	WDR37	WD repeat-containing protein 37 OS=Homo sapiens OX=9606 GN=WDR37 PE=1 SV=1	169.891	1.66603	3.1734	0.608134	2.73958	0.00615177	0.0262478	76.2533	82.7586	85.2261	75.7548	353.178	346.174
Q8TF01	PNISR	Arginine/serine-rich protein PNISR OS=Homo sapiens OX=9606 GN=PNISR PE=1 SV=2	758.502	1.58851	3.00738	0.382734	4.15041	3.31877e-05	0.000283748	252.589	265.801	617.394	1144.4	1146.8	1124.02
Q9ULF5	SLC39A10	Zinc transporter ZIP10 OS=Homo sapiens OX=9606 GN=SLC39A10 PE=1 SV=2	383.612	1.58086	2.99147	0.0996521	15.8638	1.12925e-56	2.3452e-54	188.727	193.752	194.236	582.807	575.967	566.181
P05164-3	MPO	Isoform H7 of Myeloperoxidase OS=Homo sapiens OX=9606 GN=MPO	259.547	1.55667	2.94175	0.330825	4.70543	2.53325e-06	2.66279e-05	127.724	124.625	142.704	259.587	355.231	547.413
Q6ZW49	PAXIP1	PAX-interacting protein 1 OS=Homo sapiens OX=9606 GN=PAXIP1 PE=1 SV=2	377.428	1.52618	2.88023	0.548464	2.78265	0.00539165	0.0236293	188.727	196.673	198.2	178.781	756.663	745.524
P30044	PRDX5	Peroxiredoxin-5, mitochondrial OS=Homo sapiens OX=9606 GN=PRDX5 PE=1 SV=4	2084.08	1.48503	2.79923	0.502092	2.95768	0.0030996	0.0148366	1099.95	1097.28	1094.07	969.662	4076.94	4166.59
P17010-3	ZFX	Isoform 3 of Zinc finger X-chromosomal protein OS=Homo sapiens OX=9606 GN=ZFX	571.52	1.47588	2.78152	0.107902	13.6779	1.37521e-42	1.77072e-40	269.746	329.087	308.201	862.595	832.637	826.854
A0A087WXF8	ZCCHC17	Nucleolar protein of 40 kDa OS=Homo sapiens OX=9606 GN=ZCCHC17 PE=1 SV=1	501.53	1.4655	2.76158	0.088794	16.5045	3.40813e-61	7.83626e-59	277.371	265.801	256.669	747.448	733.049	728.841
A1L390	PLEKHG3	Pleckstrin homology domain-containing family G member 3 OS=Homo sapiens OX=9606 GN=PLEKHG3 PE=1 SV=1	348.025	1.4343	2.70252	0.10205	14.0548	7.19462e-45	9.64978e-43	187.774	187.911	188.29	506.042	505.126	513.004
P30505	HLA-C	HLA class I histocompatibility antigen, Cw-8 alpha chain OS=Homo sapiens OX=9606 GN=HLA-C PE=1 SV=1	320.738	1.40694	2.65174	0.548147	2.56671	0.0102667	0.0392968	174.429	181.095	171.443	151.51	605.741	640.212
Q6P1N9	TATDN1	Putative deoxyribonuclease TATDN1 OS=Homo sapiens OX=9606 GN=TATDN1 PE=1 SV=2	516.507	1.39751	2.63446	0.426755	3.27474	0.00105761	0.00598847	287.856	282.353	282.435	491.901	490.753	1263.74
P50148	GNAQ	Guanine nucleotide-binding protein G(q) subunit alpha OS=Homo sapiens OX=9606 GN=GNAQ PE=1 SV=4	607.007	1.39355	2.62725	0.0832185	16.7457	6.08839e-63	1.50758e-60	351.718	325.192	327.031	893.907	883.971	860.22
P24821	TNC	Tenascin OS=Homo sapiens OX=9606 GN=TNC PE=1 SV=3	306.945	1.38263	2.60743	0.331	4.17713	2.95205e-05	0.000254763	171.57	167.464	171.443	322.211	356.258	652.725
O75506	HSBP1	Heat shock factor-binding protein 1 OS=Homo sapiens OX=9606 GN=HSBP1 PE=1 SV=1	771.78	1.36148	2.56949	0.0941959	14.4537	2.37413e-47	3.25205e-45	414.627	451.764	431.086	1178.75	1120.11	1034.35
Q9Y2J4-4	AMOTL2	Isoform 4 of Angiomotin-like protein 2 OS=Homo sapiens OX=9606 GN=AMOTL2	544.608	1.33355	2.52022	0.514862	2.59012	0.00959431	0.0373673	151.553	231.724	545.051	547.455	902.451	889.416
Q96S94	CCNL2	Cyclin-L2 OS=Homo sapiens OX=9606 GN=CCNL2 PE=1 SV=1	152.077	1.3313	2.5163	0.539462	2.46783	0.0135934	0.0487526	92.4572	81.7849	85.2261	79.7951	285.417	287.783
Q96PU4	UHRF2	E3 ubiquitin-protein ligase UHRF2 OS=Homo sapiens OX=9606 GN=UHRF2 PE=1 SV=1	482.882	1.31789	2.49302	0.08739	15.0806	2.17259e-51	3.68082e-49	270.699	284.3	274.507	693.914	694.035	679.835
Q92574	TSC1	Hamartin OS=Homo sapiens OX=9606 GN=TSC1 PE=1 SV=2	104.554	1.31173	2.4824	0.47571	2.75743	0.00582583	0.0250378	54.3305	58.4178	67.3881	69.6945	198.149	179.343
O75494	SRSF10	Serine/arginine-rich splicing factor 10 OS=Homo sapiens OX=9606 GN=SRSF10 PE=1 SV=1	2137.77	1.29791	2.45873	0.219232	5.92027	3.21417e-09	5.08423e-08	997.965	1378.66	1331.91	2679.7	2556.43	3881.94
Q9Y3B8	REXO2	Oligoribonuclease, mitochondrial OS=Homo sapiens OX=9606 GN=REXO2 PE=1 SV=3	1704.7	1.27653	2.42256	0.441268	2.89288	0.0038173	0.0176297	717.734	643.57	1627.22	1474.69	2878.81	2886.17
P41214	EIF2D	Eukaryotic translation initiation factor 2D OS=Homo sapiens OX=9606 GN=EIF2D PE=1 SV=3	1465.37	1.24962	2.37779	0.201389	6.20502	5.46887e-10	9.49019e-09	712.015	759.432	1131.72	2059.52	2107.77	2021.78
Q969Y2-2	GTPBP3	Isoform 2 of tRNA modification GTPase GTPBP3, mitochondrial OS=Homo sapiens OX=9606 GN=GTPBP3	383.241	1.23479	2.35348	0.0985166	12.5339	4.87252e-36	4.75293e-34	222.088	229.777	233.876	523.213	545.167	545.328
Q96RU2-2	USP28	Isoform 2 of Ubiquitin carboxyl-terminal hydrolase 28 OS=Homo sapiens OX=9606 GN=USP28	1990.7	1.23397	2.35214	0.320492	3.85025	0.000117998	0.0008969	712.969	1098.25	1752.09	2883.73	2803.86	2693.27
Q8N128-2	FAM177A1	Isoform 2 of Protein FAM177A1 OS=Homo sapiens OX=9606 GN=FAM177A1	230.689	1.22673	2.34036	0.474303	2.58639	0.00969876	0.0376829	129.631	149.939	134.776	137.369	445.579	386.838
Q5SYE7-2	NHSL1	Isoform 2 of NHS-like protein 1 OS=Homo sapiens OX=9606 GN=NHSL1	345.386	1.22419	2.33624	0.359322	3.40694	0.00065696	0.00403669	183.008	157.728	280.453	314.13	571.86	565.139
Q9BQ70	TCF25	Transcription factor 25 OS=Homo sapiens OX=9606 GN=TCF25 PE=1 SV=1	1004.8	1.21922	2.32821	0.0619898	19.6681	4.04623e-86	1.86069e-83	599.542	613.387	598.565	1427.22	1415.79	1374.27
Q14728	MFSD10	Major facilitator superfamily domain-containing protein 10 OS=Homo sapiens OX=9606 GN=MFSD10 PE=1 SV=1	441.128	1.21431	2.3203	0.0928728	13.075	4.57437e-39	5.07755e-37	272.606	269.696	254.687	607.049	611.901	630.828
Q5SNT2	TMEM201	Transmembrane protein 201 OS=Homo sapiens OX=9606 GN=TMEM201 PE=1 SV=1	662.968	1.21136	2.31556	0.442173	2.73956	0.00615221	0.0262478	406.049	396.267	397.392	385.845	1182.73	1209.52
Q9NXE8	CWC25	Pre-mRNA-splicing factor CWC25 homolog OS=Homo sapiens OX=9606 GN=CWC25 PE=1 SV=1	1092.46	1.19673	2.29219	0.0876598	13.652	1.96481e-42	2.48029e-40	612.886	672.778	705.593	1443.38	1578.01	1542.14
O75197	LRP5	Low-density lipoprotein receptor-related protein 5 OS=Homo sapiens OX=9606 GN=LRP5 PE=1 SV=2	925.782	1.19357	2.28718	0.440685	2.70844	0.00676005	0.0283157	364.11	342.718	983.074	1224.2	1238.18	1402.42
P19623	SRM	Spermidine synthase OS=Homo sapiens OX=9606 GN=SRM PE=1 SV=1	3181.41	1.18296	2.27042	0.0581702	20.3361	6.1605e-92	3.96613e-89	2064.56	1886.9	1884.89	4548.32	4381.87	4321.96
Q8NI08	NCOA7	Nuclear receptor coactivator 7 OS=Homo sapiens OX=9606 GN=NCOA7 PE=1 SV=2	511.753	1.17818	2.26291	0.454946	2.58971	0.00960563	0.0373888	126.771	403.083	411.266	721.186	698.142	710.073
Q9NX62	IMPAD1	Inositol monophosphatase 3 OS=Homo sapiens OX=9606 GN=IMPAD1 PE=1 SV=1	502.013	1.17472	2.25749	0.128634	9.13229	6.70664e-20	2.89781e-18	305.013	324.219	295.318	612.099	734.076	741.353
P07919	UQCRH	Cytochrome b-c1 complex subunit 6, mitochondrial OS=Homo sapiens OX=9606 GN=UQCRH PE=1 SV=2	1879.38	1.1574	2.23054	0.093084	12.4339	1.71112e-35	1.62003e-33	1103.77	1181.99	1205.06	2675.66	2766.9	2342.93
A0A087WV86	BORA	Protein aurora borealis OS=Homo sapiens OX=9606 GN=BORA PE=1 SV=1	107.094	1.15356	2.22462	0.187351	6.15722	7.40345e-10	1.25761e-08	71.4875	60.3651	67.3881	151.51	142.708	149.105
Q8NFH3	NUP43	Nucleoporin Nup43 OS=Homo sapiens OX=9606 GN=NUP43 PE=1 SV=1	957.421	1.15189	2.22205	0.0743683	15.489	4.11762e-54	7.79683e-52	607.167	587.099	588.655	1376.72	1333.66	1251.23
Q02338	BDH1	D-beta-hydroxybutyrate dehydrogenase, mitochondrial OS=Homo sapiens OX=9606 GN=BDH1 PE=1 SV=3	2192.35	1.14963	2.21858	0.176394	6.51742	7.15287e-11	1.33479e-09	1271.52	1162.51	1652.99	2781.72	2807.97	3477.38
Q9BRK5	SDF4	45 kDa calcium-binding protein OS=Homo sapiens OX=9606 GN=SDF4 PE=1 SV=1	941.932	1.14867	2.21709	0.15874	7.23617	4.6155e-13	1.08053e-11	618.605	593.914	544.06	1058.55	1448.64	1387.82
P28749	RBL1	Retinoblastoma-like protein 1 OS=Homo sapiens OX=9606 GN=RBL1 PE=1 SV=3	113.38	1.14419	2.21023	0.362312	3.15803	0.00158838	0.00845256	75.3002	66.2068	70.3611	93.936	190.962	183.514
O75146	HIP1R	Huntingtin-interacting protein 1-related protein OS=Homo sapiens OX=9606 GN=HIP1R PE=1 SV=2	688.613	1.13549	2.19693	0.259929	4.36845	1.25131e-05	0.000117433	293.575	500.446	498.474	800.981	1019.49	1018.71
P04083	ANXA1	Annexin A1 OS=Homo sapiens OX=9606 GN=ANXA1 PE=1 SV=2	6823.06	1.13117	2.19037	0.145733	7.76192	8.36511e-15	2.3415e-13	3388.51	4867.18	4576.45	9346.13	9692.88	9067.24
A1X283	SH3PXD2B	SH3 and PX domain-containing protein 2B OS=Homo sapiens OX=9606 GN=SH3PXD2B PE=1 SV=3	227.505	1.12819	2.18584	0.429507	2.6267	0.00862168	0.0341788	157.272	132.414	138.74	149.49	408.618	378.497
Q96QR8	PURB	Transcriptional activator protein Pur-beta OS=Homo sapiens OX=9606 GN=PURB PE=1 SV=3	1725.5	1.12764	2.18501	0.0483935	23.3015	4.28428e-120	9.19406e-117	1069.45	1112.86	1068.3	2380.72	2383.95	2337.71
Q9BU61	NDUFAF3	NADH dehydrogenase [ubiquinone] 1 alpha subcomplex assembly factor 3 OS=Homo sapiens OX=9606 GN=NDUFAF3 PE=1 SV=1	536.213	1.10132	2.1455	0.0825292	13.3446	1.27424e-40	1.54784e-38	342.187	349.533	330.995	718.156	738.182	738.225
O14561	NDUFAB1	Acyl carrier protein, mitochondrial OS=Homo sapiens OX=9606 GN=NDUFAB1 PE=1 SV=3	899.831	1.09673	2.13869	0.0737954	14.8618	5.83733e-50	9.16603e-48	569.994	567.626	582.709	1268.64	1247.42	1162.6
P51790	CLCN3	H(+)/Cl(-) exchange transporter 3 OS=Homo sapiens OX=9606 GN=CLCN3 PE=1 SV=2	530.709	1.09177	2.13135	0.270759	4.03226	5.52435e-05	0.000449063	271.652	269.696	475.681	695.935	732.022	739.268
Q9P2K3-3	RCOR3	Isoform 3 of REST corepressor 3 OS=Homo sapiens OX=9606 GN=RCOR3	989.597	1.08588	2.12267	0.0666014	16.3042	9.219e-60	1.9784e-57	661.498	609.492	630.277	1362.58	1319.28	1354.46
P08648	ITGA5	Integrin alpha-5 OS=Homo sapiens OX=9606 GN=ITGA5 PE=1 SV=2	285.631	1.07612	2.10836	0.120249	8.94906	3.58533e-19	1.45172e-17	184.914	184.99	181.353	363.623	388.085	410.82
Q13107	USP4	Ubiquitin carboxyl-terminal hydrolase 4 OS=Homo sapiens OX=9606 GN=USP4 PE=1 SV=3	613.512	1.0716	2.10176	0.193202	5.54651	2.91423e-08	4.08754e-07	412.721	390.426	383.518	748.458	704.302	1041.65
Q6PCB5	RSBN1L	Round spermatid basic protein 1-like protein OS=Homo sapiens OX=9606 GN=RSBN1L PE=1 SV=2	1539.77	1.07158	2.10174	0.084897	12.6221	1.5941e-36	1.60356e-34	1063.73	953.184	961.272	1946.39	2177.59	2136.47
Q9H1D9	POLR3F	DNA-directed RNA polymerase III subunit RPC6 OS=Homo sapiens OX=9606 GN=POLR3F PE=1 SV=1	793.198	1.06955	2.09877	0.359586	2.97438	0.00293578	0.0141365	529.961	502.393	503.429	554.525	1363.43	1305.45
Q9H3P7	ACBD3	Golgi resident protein GCP60 OS=Homo sapiens OX=9606 GN=ACBD3 PE=1 SV=4	1145.37	1.06868	2.09752	0.0579235	18.4499	5.22546e-76	2.10259e-73	740.61	755.537	722.44	1565.6	1563.63	1524.41
F5H0R1	TUT1	Speckle targeted PIP5K1A-regulated poly(A) polymerase OS=Homo sapiens OX=9606 GN=TUT1 PE=1 SV=1	1042.83	1.06657	2.09444	0.147381	7.23679	4.59436e-13	1.08053e-11	695.812	660.121	665.953	1157.53	1566.71	1510.86
Q8NBT2	SPC24	Kinetochore protein Spc24 OS=Homo sapiens OX=9606 GN=SPC24 PE=1 SV=2	1472.97	1.04646	2.06545	0.0619277	16.898	4.65289e-64	1.19821e-61	977.949	933.711	971.182	1921.14	1959.93	2073.91
Q9UPN7	PPP6R1	Serine/threonine-protein phosphatase 6 regulatory subunit 1 OS=Homo sapiens OX=9606 GN=PPP6R1 PE=1 SV=5	983.427	1.04362	2.06139	0.0753637	13.8477	1.31326e-43	1.72546e-41	659.591	652.332	615.412	1360.56	1357.27	1255.4
P62760	VSNL1	Visinin-like protein 1 OS=Homo sapiens OX=9606 GN=VSNL1 PE=1 SV=2	2647.79	1.0295	2.04132	0.328961	3.12955	0.00175071	0.00917095	987.481	1678.54	2557.78	3655.42	3567.71	3439.84
P48634	PRRC2A	Protein PRRC2A OS=Homo sapiens OX=9606 GN=PRRC2A PE=1 SV=3	1868.41	1.0276	2.03863	0.117122	8.7738	1.72732e-18	6.65899e-17	1063.73	1237.48	1388.39	2467.59	2449.66	2603.6
O75530	EED	Polycomb protein EED OS=Homo sapiens OX=9606 GN=EED PE=1 SV=2	1091.11	1.02565	2.03587	0.382408	2.68208	0.00731663	0.0301565	713.922	745.801	696.674	696.945	1864.45	1828.88
Q9BTC8	MTA3	Metastasis-associated protein MTA3 OS=Homo sapiens OX=9606 GN=MTA3 PE=1 SV=2	802.618	1.02379	2.03325	0.179465	5.70465	1.16584e-08	1.72941e-07	555.696	546.207	485.591	846.434	1185.81	1195.97
P49721	PSMB2	Proteasome subunit beta type-2 OS=Homo sapiens OX=9606 GN=PSMB2 PE=1 SV=1	4795.22	1.02182	2.03048	0.238457	4.28513	1.82631e-05	0.000165138	2610.72	2447.71	4435.72	6372.5	6397.24	6507.44
P62318	SNRPD3	Small nuclear ribonucleoprotein Sm D3 OS=Homo sapiens OX=9606 GN=SNRPD3 PE=1 SV=1	3097.74	1.01685	2.02349	0.348686	2.91623	0.00354291	0.0166248	2157.02	2028.07	1962.18	2057.5	5042.02	5339.62
Q92610	ZNF592	Zinc finger protein 592 OS=Homo sapiens OX=9606 GN=ZNF592 PE=1 SV=2	436.703	1.01532	2.02136	0.0897223	11.3163	1.08978e-29	7.54406e-28	295.482	285.274	286.399	574.727	595.474	582.864
P51692	STAT5B	Signal transducer and activator of transcription 5B OS=Homo sapiens OX=9606 GN=STAT5B PE=1 SV=2	613.631	1.01307	2.0182	0.32675	3.10043	0.00193238	0.00995088	398.424	396.267	425.14	467.66	1026.68	967.618
Q12849	GRSF1	G-rich sequence factor 1 OS=Homo sapiens OX=9606 GN=GRSF1 PE=1 SV=3	3686.21	1.00831	2.01155	0.0979411	10.2951	7.41754e-25	4.26376e-23	2532.56	2387.34	2423.99	4601.85	4610.82	5560.67
Q14498-2	RBM39	Isoform 2 of RNA-binding protein 39 OS=Homo sapiens OX=9606 GN=RBM39	7057.28	1.00341	2.00473	0.234093	4.28638	1.8161e-05	0.000164445	3176.9	5015.17	5900.42	8194.65	10004	10052.6
Q9H967	WDR76	WD repeat-containing protein 76 OS=Homo sapiens OX=9606 GN=WDR76 PE=1 SV=2	986.608	0.998137	1.99742	0.0674105	14.8069	1.32283e-49	2.0277e-47	693.905	649.411	631.268	1318.13	1312.1	1314.83
Q8NF37	LPCAT1	Lysophosphatidylcholine acyltransferase 1 OS=Homo sapiens OX=9606 GN=LPCAT1 PE=1 SV=2	662.553	0.995477	1.99374	0.0754525	13.1934	9.57398e-40	1.10067e-37	453.707	444.949	429.104	900.978	864.464	882.117
Q9NYR9	NKIRAS2	NF-kappa-B inhibitor-interacting Ras-like protein 2 OS=Homo sapiens OX=9606 GN=NKIRAS2 PE=1 SV=1	268.376	0.992562	1.98971	0.118918	8.34658	7.02691e-17	2.39361e-15	179.195	189.858	169.461	349.482	355.231	367.027
Q8N2Z9	CENPS	Centromere protein S OS=Homo sapiens OX=9606 GN=CENPS PE=1 SV=1	352.087	0.992212	1.98923	0.103138	9.6202	6.57006e-22	3.22886e-20	245.917	226.856	233.876	467.66	481.513	456.699
F8WAL6	ABI2	Abl interactor 2 OS=Homo sapiens OX=9606 GN=ABI2 PE=1 SV=2	2345.42	0.986181	1.98093	0.0426471	23.1243	2.64068e-118	4.25017e-115	1612.76	1561.7	1545.96	3126.15	3074.9	3151.01
P13640	MT1G	Metallothionein-1G OS=Homo sapiens OX=9606 GN=MT1G PE=1 SV=2	224.551	0.973355	1.9634	0.183312	5.30982	1.09736e-07	1.42953e-06	130.584	162.596	161.533	259.587	328.537	304.466
Q5JWF2-2	GNAS	Isoform XLas-2 of Guanine nucleotide-binding protein G(s) subunit alpha isoforms XLas OS=Homo sapiens OX=9606 GN=GNAS	1496.4	0.972677	1.96248	0.242889	4.00461	6.21195e-05	0.000496802	855.944	798.377	1376.5	1760.54	2100.59	2086.43
Q13153	PAK1	Serine/threonine-protein kinase PAK 1 OS=Homo sapiens OX=9606 GN=PAK1 PE=1 SV=2	3760.43	0.962718	1.94898	0.214385	4.49061	7.10209e-06	6.93828e-05	2649.8	2528.52	2472.55	3452.4	5406.49	6052.82
Q01081	U2AF1	Splicing factor U2AF 35 kDa subunit OS=Homo sapiens OX=9606 GN=U2AF1 PE=1 SV=3	2698.12	0.95914	1.94415	0.0445194	21.5443	5.98485e-103	5.50435e-100	1848.19	1857.69	1792.72	3656.43	3561.55	3472.16
O60890	OPHN1	Oligophrenin-1 OS=Homo sapiens OX=9606 GN=OPHN1 PE=1 SV=1	290.355	0.957212	1.94155	0.114858	8.33385	7.82559e-17	2.65164e-15	191.586	207.383	193.245	367.664	386.031	396.223
A0A3B3IRZ4	IQSEC1	IQ motif and SEC7 domain-containing protein 1 OS=Homo sapiens OX=9606 GN=IQSEC1 PE=1 SV=1	517.562	0.954478	1.93788	0.350074	2.7265	0.00640092	0.0271113	283.09	277.485	496.492	465.64	811.077	771.592
P55209	NAP1L1	Nucleosome assembly protein 1-like 1 OS=Homo sapiens OX=9606 GN=NAP1L1 PE=1 SV=1	987.639	0.949677	1.93144	0.0788683	12.0413	2.1551e-33	1.77878e-31	657.685	714.645	649.106	1260.56	1364.46	1279.38
P49902	NT5C2	Cytosolic purine 5'-nucleotidase OS=Homo sapiens OX=9606 GN=NT5C2 PE=1 SV=1	1296.31	0.946734	1.9275	0.357443	2.64863	0.00808198	0.0325402	906.461	877.241	873.072	859.565	2136.52	2125
Q8IWB7	WDFY1	WD repeat and FYVE domain-containing protein 1 OS=Homo sapiens OX=9606 GN=WDFY1 PE=1 SV=1	396.779	0.945469	1.92582	0.38272	2.47039	0.0134965	0.048542	269.746	287.221	256.669	266.657	659.128	641.255
Q6DT37	CDC42BPG	Serine/threonine-protein kinase MRCK gamma OS=Homo sapiens OX=9606 GN=CDC42BPG PE=1 SV=2	402.36	0.942642	1.92204	0.104506	9.02	1.88087e-19	7.9144e-18	295.482	258.012	272.525	515.133	529.767	543.242
Q14119	VEZF1	Vascular endothelial zinc finger 1 OS=Homo sapiens OX=9606 GN=VEZF1 PE=1 SV=2	189.443	0.93944	1.91778	0.200468	4.68623	2.78277e-06	2.88494e-05	107.708	140.203	141.713	220.194	249.483	277.356
Q13530	SERINC3	Serine incorporator 3 OS=Homo sapiens OX=9606 GN=SERINC3 PE=2 SV=2	495.422	0.930405	1.90581	0.0998644	9.31668	1.20037e-20	5.48082e-19	333.608	358.296	330.995	645.431	614.981	689.219
P25398	RPS12	40S ribosomal protein S12 OS=Homo sapiens OX=9606 GN=RPS12 PE=1 SV=3	5182.35	0.929501	1.90462	0.355078	2.61774	0.0088515	0.0349393	1878.69	4021.09	4805.37	5927.06	5764.8	8697.09
Q9Y2H0	DLGAP4	Disks large-associated protein 4 OS=Homo sapiens OX=9606 GN=DLGAP4 PE=1 SV=3	1418.64	0.928823	1.90372	0.0879712	10.5583	4.65209e-26	2.82549e-24	948.401	1005.76	977.128	1691.86	1975.33	1913.34
Q16513	PKN2	Serine/threonine-protein kinase N2 OS=Homo sapiens OX=9606 GN=PKN2 PE=1 SV=1	1023.2	0.927556	1.90205	0.0631841	14.6802	8.63308e-49	1.29255e-46	726.313	694.198	694.692	1303.99	1360.35	1359.67
P30566	ADSL	Adenylosuccinate lyase OS=Homo sapiens OX=9606 GN=ADSL PE=1 SV=2	3559.57	0.926944	1.90124	0.0835212	11.0983	1.27846e-28	8.39872e-27	2340.02	2551.88	2469.58	4244.29	4987.61	4764.06
P10644	PRKAR1A	cAMP-dependent protein kinase type I-alpha regulatory subunit OS=Homo sapiens OX=9606 GN=PRKAR1A PE=1 SV=1	5992.02	0.92565	1.89954	0.165343	5.59837	2.1638e-08	3.10258e-07	3765.96	3450.55	5182.94	7669.42	7624.12	8259.16
P19419	ELK1	ETS domain-containing protein Elk-1 OS=Homo sapiens OX=9606 GN=ELK1 PE=1 SV=2	613.531	0.923728	1.89701	0.0746802	12.3691	3.84009e-35	3.53179e-33	428.925	424.503	417.212	813.102	799.783	797.659
O15164	TRIM24	Transcription intermediary factor 1-alpha OS=Homo sapiens OX=9606 GN=TRIM24 PE=1 SV=3	794.581	0.920419	1.89267	0.324333	2.83788	0.00454144	0.0204204	588.104	522.839	537.123	585.837	1280.27	1253.31
P08670	VIM	Vimentin OS=Homo sapiens OX=9606 GN=VIM PE=1 SV=4	11836.7	0.91952	1.89149	0.0874186	10.5186	7.09261e-26	4.2675e-24	7936.07	7552.45	9073.61	14762.1	16357.1	15339
Q00577	PURA	Transcriptional activator protein Pur-alpha OS=Homo sapiens OX=9606 GN=PURA PE=1 SV=2	2292.06	0.918687	1.89039	0.063334	14.5054	1.11928e-47	1.56651e-45	1511.72	1545.15	1701.55	2976.66	3013.3	3003.99
P17252	PRKCA	Protein kinase C alpha type OS=Homo sapiens OX=9606 GN=PRKCA PE=1 SV=4	1253.72	0.917768	1.88919	0.123258	7.44593	9.62671e-14	2.4594e-12	863.569	904.502	835.414	1407.02	1801.82	1710.01
Q6ICG6-2	KIAA0930	Isoform 2 of Uncharacterized protein KIAA0930 OS=Homo sapiens OX=9606 GN=KIAA0930	386.289	0.914732	1.88522	0.10207	8.96184	3.19307e-19	1.31063e-17	264.027	269.696	269.552	492.912	486.646	534.901
Q5RKV6	EXOSC6	Exosome complex component MTR3 OS=Homo sapiens OX=9606 GN=EXOSC6 PE=1 SV=1	4370.53	0.912379	1.88215	0.221705	4.11529	3.86696e-05	0.000325006	2562.11	2394.16	4142.39	5594.75	5769.94	5759.83
A0A2R8YE63	EPS8	Epidermal growth factor receptor kinase substrate 8 OS=Homo sapiens OX=9606 GN=EPS8 PE=1 SV=1	3435.12	0.908822	1.87751	0.195737	4.64308	3.43261e-06	3.50224e-05	2064.56	1965.76	3132.56	4548.32	4404.45	4495.04
Q3SXM5	HSDL1	Inactive hydroxysteroid dehydrogenase-like protein 1 OS=Homo sapiens OX=9606 GN=HSDL1 PE=1 SV=3	1712.36	0.90626	1.87418	0.052763	17.1761	4.01232e-66	1.1231e-63	1160.96	1237.48	1176.32	2222.14	2277.17	2200.08
O14656	TOR1A	Torsin-1A OS=Homo sapiens OX=9606 GN=TOR1A PE=1 SV=1	601.305	0.905509	1.8732	0.0823873	10.9909	4.22812e-28	2.69512e-26	443.222	411.846	400.365	780.78	784.383	787.232
P37198	NUP62	Nuclear pore glycoprotein p62 OS=Homo sapiens OX=9606 GN=NUP62 PE=1 SV=3	2467.56	0.896001	1.8609	0.103555	8.65242	5.04182e-18	1.87626e-16	1576.54	1636.67	1962.18	3213.02	3128.29	3288.65
Q8NHP6	MOSPD2	Motile sperm domain-containing protein 2 OS=Homo sapiens OX=9606 GN=MOSPD2 PE=1 SV=1	1968.32	0.895479	1.86023	0.202135	4.4301	9.41882e-06	9.01016e-05	1045.62	1584.1	1499.39	2156.49	2731.99	2792.33
Q9Y265	RUVBL1	RuvB-like 1 OS=Homo sapiens OX=9606 GN=RUVBL1 PE=1 SV=1	13863.9	0.890706	1.85408	0.211962	4.2022	2.64328e-05	0.000230277	7977.05	7958.45	13210.1	16973.1	17979.2	19085.4
Q5GLZ8	HERC4	Probable E3 ubiquitin-protein ligase HERC4 OS=Homo sapiens OX=9606 GN=HERC4 PE=1 SV=1	1178.94	0.88836	1.85107	0.0722757	12.2913	1.00917e-34	8.7798e-33	784.456	810.06	886.946	1551.46	1521.54	1519.2
E9PSI1	3	Transmembrane 9 superfamily member OS=Homo sapiens OX=9606 PE=3 SV=1	3029.07	0.874078	1.83284	0.233634	3.74123	0.000183119	0.001328	1686.15	1800.24	2929.4	3743.3	3731.98	4283.38
Q14258	TRIM25	E3 ubiquitin/ISG15 ligase TRIM25 OS=Homo sapiens OX=9606 GN=TRIM25 PE=1 SV=2	2826.41	0.872839	1.83126	0.202924	4.3013	1.69797e-05	0.0001544	1427.84	2138.09	2423.99	3677.65	3651.9	3638.99
Q9Y376	CAB39	Calcium-binding protein 39 OS=Homo sapiens OX=9606 GN=CAB39 PE=1 SV=1	2247.13	0.872283	1.83056	0.0511892	17.0404	4.12243e-65	1.10584e-62	1628.01	1511.07	1624.25	2946.36	2893.18	2879.91
Q99598	TSNAX	Translin-associated protein X OS=Homo sapiens OX=9606 GN=TSNAX PE=1 SV=1	3307.26	0.858063	1.8126	0.0547491	15.6726	2.32677e-55	4.68116e-53	2221.83	2458.42	2375.43	4297.82	4317.19	4172.85
Q969U7	PSMG2	Proteasome assembly chaperone 2 OS=Homo sapiens OX=9606 GN=PSMG2 PE=1 SV=1	2228.02	0.857628	1.81206	0.264434	3.24325	0.00118173	0.00659841	1255.32	1479.92	2018.67	2184.77	2728.91	3700.51
Q9NZL4-3	HSPBP1	Isoform 3 of Hsp70-binding protein 1 OS=Homo sapiens OX=9606 GN=HSPBP1	2172.3	0.848171	1.80022	0.0563061	15.0636	2.81176e-51	4.64157e-49	1625.15	1530.55	1498.39	2801.92	2713.51	2864.27
O14757	CHEK1	Serine/threonine-protein kinase Chk1 OS=Homo sapiens OX=9606 GN=CHEK1 PE=1 SV=2	1197.36	0.847962	1.79996	0.191302	4.43259	9.31073e-06	8.92001e-05	902.649	824.665	838.387	1154.5	1727.9	1736.08
Q96G23	CERS2	Ceramide synthase 2 OS=Homo sapiens OX=9606 GN=CERS2 PE=1 SV=1	1438.03	0.846683	1.79836	0.0707648	11.9648	5.43603e-33	4.43002e-31	1102.81	995.05	985.056	1822.16	1893.2	1829.92
Q9BVC4	MLST8	Target of rapamycin complex subunit LST8 OS=Homo sapiens OX=9606 GN=MLST8 PE=1 SV=1	218.504	0.846203	1.79776	0.124723	6.78464	1.16375e-11	2.34866e-10	156.319	160.649	151.623	284.838	283.364	274.228
O75674	TOM1L1	TOM1-like protein 1 OS=Homo sapiens OX=9606 GN=TOM1L1 PE=1 SV=2	1105.05	0.837455	1.7869	0.0575019	14.564	4.76213e-48	6.81302e-46	795.894	799.35	783.882	1438.33	1427.08	1385.74
Q6NUM9	RETSAT	All-trans-retinol 13,14-reductase OS=Homo sapiens OX=9606 GN=RETSAT PE=1 SV=2	800.757	0.835064	1.78394	0.238029	3.50825	0.000451073	0.00290401	544.258	598.783	582.709	793.911	913.745	1371.14
P61586	RHOA	Transforming protein RhoA OS=Homo sapiens OX=9606 GN=RHOA PE=1 SV=1	2299.3	0.834963	1.78381	0.281052	2.97084	0.00296982	0.0142684	1735.72	1601.62	1618.31	1762.56	3556.42	3521.17
Q66K74	MAP1S	Microtubule-associated protein 1S OS=Homo sapiens OX=9606 GN=MAP1S PE=1 SV=2	775.58	0.829812	1.77745	0.18583	4.46543	7.9908e-06	7.74771e-05	456.567	609.492	609.466	923.199	894.238	1160.52
Q9NZI7	UBP1	Upstream-binding protein 1 OS=Homo sapiens OX=9606 GN=UBP1 PE=1 SV=1	360.634	0.820591	1.76613	0.311366	2.63546	0.00840244	0.0334539	276.418	258.012	247.75	280.798	551.327	549.498
Q9Y2H1	STK38L	Serine/threonine-protein kinase 38-like OS=Homo sapiens OX=9606 GN=STK38L PE=1 SV=3	4052.01	0.816776	1.76146	0.280666	2.91013	0.00361274	0.0168542	2110.31	2351.32	4342.57	5139.21	5140.58	5228.05
Q92995	USP13	Ubiquitin carboxyl-terminal hydrolase 13 OS=Homo sapiens OX=9606 GN=USP13 PE=1 SV=2	1443.7	0.809871	1.75305	0.0790713	10.2423	1.28163e-24	7.23784e-23	1062.78	960.973	1122.8	1866.6	1829.54	1819.5
Q9H6S3	EPS8L2	Epidermal growth factor receptor kinase substrate 8-like protein 2 OS=Homo sapiens OX=9606 GN=EPS8L2 PE=1 SV=2	6446.78	0.808591	1.7515	0.146838	5.5067	3.65629e-08	5.10611e-07	3933.72	4413.47	5711.14	8264.35	8005.02	8353
Q9H3N1	TMX1	Thioredoxin-related transmembrane protein 1 OS=Homo sapiens OX=9606 GN=TMX1 PE=1 SV=1	5899.34	0.799083	1.74	0.223921	3.5686	0.000358892	0.00239323	3764.06	4648.11	4506.08	5245.27	7825.35	9407.16
Q02818	NUCB1	Nucleobindin-1 OS=Homo sapiens OX=9606 GN=NUCB1 PE=1 SV=4	1888.62	0.79514	1.73525	0.107669	7.38507	1.5237e-13	3.78748e-12	1189.55	1475.05	1478.57	2413.04	2407.56	2367.95
P41227	NAA10	N-alpha-acetyltransferase 10 OS=Homo sapiens OX=9606 GN=NAA10 PE=1 SV=1	4082.04	0.792844	1.73249	0.249109	3.18272	0.00145898	0.0078541	2209.44	3428.15	3325.8	3786.73	5525.59	6216.53
Q00765	REEP5	Receptor expression-enhancing protein 5 OS=Homo sapiens OX=9606 GN=REEP5 PE=1 SV=3	5450.91	0.791629	1.73103	0.045434	17.4237	5.45139e-68	1.7548e-65	4090.99	4066.85	3817.34	7075.5	6906.47	6748.3
A0A1W2PPJ5	CRBN	Protein cereblon OS=Homo sapiens OX=9606 GN=CRBN PE=1 SV=1	735.863	0.788905	1.72776	0.070029	11.2654	1.9447e-29	1.33191e-27	548.071	550.101	520.276	934.31	925.038	937.379
P23497	SP100	Nuclear autoantigen Sp-100 OS=Homo sapiens OX=9606 GN=SP100 PE=1 SV=3	1075.31	0.781273	1.71865	0.227982	3.4269	0.000610509	0.00378292	641.481	691.277	1040.55	1186.83	1449.67	1442.04
Q15418	RPS6KA1	Ribosomal protein S6 kinase alpha-1 OS=Homo sapiens OX=9606 GN=RPS6KA1 PE=1 SV=2	1229.47	0.768146	1.70308	0.108227	7.09757	1.26967e-12	2.80898e-11	869.288	845.111	1014.79	1440.35	1605.73	1601.57
Q13444	ADAM15	Disintegrin and metalloproteinase domain-containing protein 15 OS=Homo sapiens OX=9606 GN=ADAM15 PE=1 SV=4	255.167	0.766437	1.70106	0.203479	3.76667	0.000165439	0.00121171	194.446	184.99	187.299	250.496	364.471	349.302
P31350-2	RRM2	Isoform 2 of Ribonucleoside-diphosphate reductase subunit M2 OS=Homo sapiens OX=9606 GN=RRM2	3013.59	0.765253	1.69967	0.1385	5.5253	3.28932e-08	4.60362e-07	2618.35	1994.97	2084.08	3433.21	3852.1	4098.82
O00151	PDLIM1	PDZ and LIM domain protein 1 OS=Homo sapiens OX=9606 GN=PDLIM1 PE=1 SV=4	1062.04	0.757331	1.69036	0.239814	3.15799	0.00158863	0.00845256	866.428	741.906	760.098	916.129	1520.51	1567.16
P78417	GSTO1	Glutathione S-transferase omega-1 OS=Homo sapiens OX=9606 GN=GSTO1 PE=1 SV=2	5900.25	0.756327	1.68918	0.177204	4.26811	1.9714e-05	0.000177509	4554.23	4320.97	4289.05	5493.74	8428.01	8315.46
Q9NQW6	ANLN	Anillin OS=Homo sapiens OX=9606 GN=ANLN PE=1 SV=2	7753.28	0.756216	1.68905	0.108229	6.98717	2.80491e-12	5.94015e-11	6004.95	5272.21	6022.32	8649.18	9709.31	10861.7
P25787	PSMA2	Proteasome subunit alpha type-2 OS=Homo sapiens OX=9606 GN=PSMA2 PE=1 SV=2	5215.76	0.754927	1.68755	0.0380524	19.8391	1.36768e-87	7.33758e-85	4009.02	3820.52	3814.37	6685.62	6471.16	6493.88
A0A3B3IRW6	QSER1	Glutamine and serine-rich protein 1 OS=Homo sapiens OX=9606 GN=QSER1 PE=1 SV=1	473.722	0.748685	1.68026	0.0950208	7.87917	3.2955e-15	9.64383e-14	376.501	332.982	350.815	579.777	599.581	602.676
Q9HC38-2	GLOD4	Isoform 2 of Glyoxalase domain-containing protein 4 OS=Homo sapiens OX=9606 GN=GLOD4	13289.2	0.734897	1.66428	0.105426	6.97071	3.15342e-12	6.61295e-11	9701.33	9176.46	11049.7	14793.4	17485.4	17528.7
Q9H2F5-2	EPC1	Isoform 2 of Enhancer of polycomb homolog 1 OS=Homo sapiens OX=9606 GN=EPC1	336.012	0.733176	1.6623	0.109445	6.69906	2.09765e-11	4.03124e-10	257.355	252.17	247.75	445.439	397.325	416.034
J3KQY1	MRPL22	39S ribosomal protein L22, mitochondrial OS=Homo sapiens OX=9606 GN=MRPL22 PE=1 SV=1	1621.69	0.732025	1.66097	0.0477877	15.3183	5.7724e-53	1.0323e-50	1229.58	1226.77	1200.1	2007	2060.55	2006.14
Q9BTX1	NDC1	Nucleoporin NDC1 OS=Homo sapiens OX=9606 GN=NDC1 PE=1 SV=2	2834.69	0.730891	1.65966	0.252592	2.89356	0.00380903	0.0176041	2258.05	2096.23	2040.47	2255.47	4230.95	4126.97
Q10713	PMPCA	Mitochondrial-processing peptidase subunit alpha OS=Homo sapiens OX=9606 GN=PMPCA PE=1 SV=2	9380.57	0.727959	1.65629	0.0405716	17.9426	5.48591e-72	1.85886e-69	7146.84	7007.22	7034.13	11180.4	11990.6	11924.2
Q96RU3	FNBP1	Formin-binding protein 1 OS=Homo sapiens OX=9606 GN=FNBP1 PE=1 SV=2	272.083	0.720753	1.64804	0.115734	6.22768	4.73394e-10	8.30438e-09	210.65	191.805	214.056	340.392	338.804	336.789
Q15121-2	PEA15	Isoform 2 of Astrocytic phosphoprotein PEA-15 OS=Homo sapiens OX=9606 GN=PEA15	1347.67	0.72	1.64718	0.0642284	11.21	3.64252e-29	2.46848e-27	1058.01	1029.13	967.218	1711.05	1694.02	1626.6
Q9NSV4	DIAPH3	Protein diaphanous homolog 3 OS=Homo sapiens OX=9606 GN=DIAPH3 PE=1 SV=4	896.792	0.719866	1.64703	0.065178	11.0446	2.32761e-28	1.51365e-26	666.263	661.095	705.593	1113.09	1122.16	1112.55
Q9BXW7	HDHD5	Haloacid dehalogenase-like hydrolase domain-containing 5 OS=Homo sapiens OX=9606 GN=HDHD5 PE=1 SV=1	2139.37	0.711093	1.63704	0.266792	2.66534	0.00769106	0.031299	1285.82	1249.17	2332.82	2756.47	2637.54	2574.4
Q15054	POLD3	DNA polymerase delta subunit 3 OS=Homo sapiens OX=9606 GN=POLD3 PE=1 SV=2	1616.9	0.710833	1.63675	0.147952	4.80449	1.55143e-06	1.71913e-05	1154.28	1168.36	1356.68	1793.87	1864.45	2363.78
Q9BXS6-6	NUSAP1	Isoform 6 of Nucleolar and spindle-associated protein 1 OS=Homo sapiens OX=9606 GN=NUSAP1	3494.01	0.710518	1.63639	0.11121	6.38896	1.67022e-10	3.03754e-09	2431.53	2458.42	3062.19	4426.1	4394.19	4191.62
P62820	RAB1A	Ras-related protein Rab-1A OS=Homo sapiens OX=9606 GN=RAB1A PE=1 SV=3	16292.2	0.709393	1.63512	0.116682	6.07972	1.20396e-09	1.9977e-08	11607.7	11256.1	14232.8	18333.7	21580.8	20742.3
Q00535	CDK5	Cyclin-dependent-like kinase 5 OS=Homo sapiens OX=9606 GN=CDK5 PE=1 SV=3	971.603	0.708916	1.63458	0.191502	3.70187	0.000214018	0.0015208	550.93	828.559	833.432	1249.45	1181.71	1185.54
P51398	DAP3	28S ribosomal protein S29, mitochondrial OS=Homo sapiens OX=9606 GN=DAP3 PE=1 SV=1	2398.54	0.700332	1.62488	0.106458	6.5785	4.75231e-11	8.97224e-10	1877.74	1810.95	1793.71	2766.57	2755.61	3386.66
Q9Y6A4	CFAP20	Cilia- and flagella-associated protein 20 OS=Homo sapiens OX=9606 GN=CFAP20 PE=1 SV=1	1224.63	0.700182	1.62471	0.0659667	10.6142	2.56039e-26	1.56989e-24	958.886	939.553	900.82	1483.78	1586.22	1478.54
Q8NI60	COQ8A	Atypical kinase COQ8A, mitochondrial OS=Homo sapiens OX=9606 GN=COQ8A PE=1 SV=1	892.723	0.698207	1.62249	0.147749	4.72563	2.29404e-06	2.44926e-05	569.04	718.539	755.143	1204	1053.37	1056.25
P61981	YWHAG	14-3-3 protein gamma OS=Homo sapiens OX=9606 GN=YWHAG PE=1 SV=2	6182.72	0.69652	1.62059	0.236928	2.9398	0.00328421	0.0155928	3941.34	5215.74	4998.61	5224.05	8343.82	9372.75
Q96EZ8-2	MCRS1	Isoform 2 of Microspherule protein 1 OS=Homo sapiens OX=9606 GN=MCRS1	493.234	0.696464	1.62053	0.0981049	7.09918	1.25498e-12	2.79851e-11	384.126	394.32	350.815	632.3	614.981	582.864
Q14197	MRPL58	Peptidyl-tRNA hydrolase ICT1, mitochondrial OS=Homo sapiens OX=9606 GN=MRPL58 PE=1 SV=1	2029.43	0.692852	1.61648	0.280865	2.46685	0.0136307	0.0487526	936.963	1736.96	1980.02	2411.02	2586.21	2525.4
P54646	PRKAA2	5'-AMP-activated protein kinase catalytic subunit alpha-2 OS=Homo sapiens OX=9606 GN=PRKAA2 PE=1 SV=2	647.58	0.689611	1.61285	0.0827959	8.32905	8.14936e-17	2.74689e-15	474.677	516.024	496.492	788.86	833.664	775.762
Q9NWS8	RMND1	Required for meiotic nuclear division protein 1 homolog OS=Homo sapiens OX=9606 GN=RMND1 PE=1 SV=2	2068.92	0.685368	1.60811	0.270434	2.53432	0.0112665	0.0423677	1199.08	1336.79	2223.81	2166.59	2568.75	2918.49
Q05D32	CTDSPL2	CTD small phosphatase-like protein 2 OS=Homo sapiens OX=9606 GN=CTDSPL2 PE=1 SV=2	1830.13	0.68476	1.60743	0.265467	2.57946	0.00989556	0.0383088	1159.05	1047.63	2004.8	2303.96	2238.16	2227.19
Q9ULW0	TPX2	Targeting protein for Xklp2 OS=Homo sapiens OX=9606 GN=TPX2 PE=1 SV=2	4578.64	0.680304	1.60248	0.108685	6.25942	3.86416e-10	6.81575e-09	3521	3511.88	3523.01	4804.88	6135.44	5975.66
Q13547	HDAC1	Histone deacetylase 1 OS=Homo sapiens OX=9606 GN=HDAC1 PE=1 SV=1	6531.87	0.679337	1.6014	0.0933855	7.27455	3.47581e-13	8.22695e-12	4495.13	5019.06	5551.59	7844.16	8448.54	7832.7
P50990	CCT8	T-complex protein 1 subunit theta OS=Homo sapiens OX=9606 GN=CCT8 PE=1 SV=4	35844.7	0.677636	1.59952	0.0455616	14.8729	4.93887e-50	7.94911e-48	28050.7	26050.4	28633	44877.2	43647.2	43809.7
Q00688	FKBP3	Peptidyl-prolyl cis-trans isomerase FKBP3 OS=Homo sapiens OX=9606 GN=FKBP3 PE=1 SV=1	5164.71	0.670086	1.59117	0.045943	14.5852	3.48968e-48	5.10603e-46	4021.41	3999.67	3938.24	6481.58	6511.2	6036.14
Q969R5	L3MBTL2	Lethal(3)malignant brain tumor-like protein 2 OS=Homo sapiens OX=9606 GN=L3MBTL2 PE=1 SV=1	349.166	0.66904	1.59001	0.0986251	6.78367	1.17159e-11	2.3571e-10	274.512	271.643	262.615	418.167	433.259	434.802
Q9HDC9	APMAP	Adipocyte plasma membrane-associated protein OS=Homo sapiens OX=9606 GN=APMAP PE=1 SV=2	8224.73	0.665406	1.58601	0.248222	2.68069	0.00734705	0.0302312	5140.43	5105.72	8836.76	8348.18	11103.5	10813.8
J9JIC5	C17orf75	Protein Njmu-R1 OS=Homo sapiens OX=9606 GN=C17orf75 PE=1 SV=1	3041.88	0.661223	1.58142	0.0904561	7.30988	2.67389e-13	6.49603e-12	2642.18	2226.69	2201.01	3760.47	3739.17	3681.74
O14980	XPO1	Exportin-1 OS=Homo sapiens OX=9606 GN=XPO1 PE=1 SV=1	11759.2	0.651788	1.57111	0.0375499	17.3579	1.71828e-67	5.26777e-65	9391.55	9124.86	8924.96	14710.6	14468	13935.6
Q9NUL5	RYDEN	Repressor of yield of DENV protein OS=Homo sapiens OX=9606 GN=RYDEN PE=1 SV=2	1152.96	0.651771	1.5711	0.0605304	10.7677	4.89324e-27	3.0291e-25	920.759	899.634	870.099	1449.44	1396.28	1381.57
Q49B96	COX19	Cytochrome c oxidase assembly protein COX19 OS=Homo sapiens OX=9606 GN=COX19 PE=1 SV=1	1615.53	0.650793	1.57003	0.0520112	12.5125	6.37456e-36	6.12529e-34	1244.84	1228.72	1298.21	1970.64	1938.37	2012.39
A0A044PY82	MISP3	Uncharacterized protein MISP3 OS=Homo sapiens OX=9606 GN=MISP3 PE=1 SV=1	603.959	0.648486	1.56752	0.081704	7.93702	2.07095e-15	6.17258e-14	487.068	467.342	456.852	758.559	708.409	745.524
Q9NQS7	INCENP	Inner centromere protein OS=Homo sapiens OX=9606 GN=INCENP PE=1 SV=3	1940.94	0.6483	1.56732	0.169602	3.82248	0.000132116	0.000995975	1202.9	1632.78	1700.56	2096.89	2454.79	2557.72
O95997	PTTG1	Securin OS=Homo sapiens OX=9606 GN=PTTG1 PE=1 SV=1	256.533	0.647928	1.56692	0.125049	5.18141	2.2021e-07	2.75283e-06	211.603	192.779	195.227	326.251	319.297	294.039
Q5T4F4-2	ZFYVE27	Isoform 2 of Protrudin OS=Homo sapiens OX=9606 GN=ZFYVE27	391.076	0.647355	1.56629	0.100942	6.41313	1.42564e-10	2.60746e-09	293.575	308.641	312.166	454.529	499.993	477.553
O43502	RAD51C	DNA repair protein RAD51 homolog 3 OS=Homo sapiens OX=9606 GN=RAD51C PE=1 SV=1	360.29	0.646592	1.56547	0.109841	5.88661	3.94196e-09	6.15979e-08	287.856	289.168	265.588	456.549	450.712	411.863
Q9H7S9	ZNF703	Zinc finger protein 703 OS=Homo sapiens OX=9606 GN=ZNF703 PE=1 SV=1	951.779	0.646339	1.56519	0.19208	3.36494	0.000765605	0.00459792	781.597	687.383	757.125	884.817	1249.47	1350.29
Q08AG7	MZT1	Mitotic-spindle organizing protein 1 OS=Homo sapiens OX=9606 GN=MZT1 PE=1 SV=2	746.961	0.642984	1.56156	0.0754047	8.52711	1.50046e-17	5.45761e-16	597.635	589.046	562.889	927.239	932.225	872.733
Q9NVU7	SDAD1	Protein SDA1 homolog OS=Homo sapiens OX=9606 GN=SDAD1 PE=1 SV=3	3366.58	0.634938	1.55287	0.250398	2.53571	0.011222	0.0422745	2698.41	2650.22	2563.72	3017.06	3508.16	5761.91
Q9NVH2	INTS7	Integrator complex subunit 7 OS=Homo sapiens OX=9606 GN=INTS7 PE=1 SV=1	2344.24	0.634271	1.55215	0.0609869	10.4001	2.47625e-25	1.44928e-23	1787.19	1768.11	1956.24	2859.49	2790.51	2903.9
P20248	CCNA2	Cyclin-A2 OS=Homo sapiens OX=9606 GN=CCNA2 PE=1 SV=2	781.022	0.633099	1.55089	0.0818483	7.73503	1.03381e-14	2.84429e-13	647.2	577.363	612.439	972.692	961.999	914.44
Q8NG31	KNL1	Kinetochore scaffold 1 OS=Homo sapiens OX=9606 GN=KNL1 PE=1 SV=3	1903.63	0.630646	1.54826	0.101337	6.22322	4.87043e-10	8.47455e-09	1486.94	1362.11	1633.17	2183.76	2266.91	2488.9
Q9NS91	RAD18	E3 ubiquitin-protein ligase RAD18 OS=Homo sapiens OX=9606 GN=RAD18 PE=1 SV=2	365.56	0.629754	1.5473	0.154986	4.06329	4.83853e-05	0.000397327	323.123	295.984	241.804	464.63	448.659	419.162
Q75N03	CBLL1	E3 ubiquitin-protein ligase Hakai OS=Homo sapiens OX=9606 GN=CBLL1 PE=1 SV=1	1304.91	0.628808	1.54629	0.0554282	11.3446	7.89204e-30	5.52271e-28	1004.64	1056.39	1013.79	1552.47	1598.54	1603.66
Q96C01	FAM136A	Protein FAM136A OS=Homo sapiens OX=9606 GN=FAM136A PE=1 SV=1	7560.79	0.627774	1.54518	0.0375206	16.7314	7.73605e-63	1.84462e-60	6113.61	5900.2	5809.25	8956.24	9393.09	9192.37
Q8IYA6	CKAP2L	Cytoskeleton-associated protein 2-like OS=Homo sapiens OX=9606 GN=CKAP2L PE=1 SV=4	259.234	0.627243	1.54461	0.122745	5.11014	3.21915e-07	3.91774e-06	221.135	192.779	197.209	311.1	317.244	315.935
Q92890-1	UFD1	Isoform Long of Ubiquitin recognition factor in ER-associated degradation protein 1 OS=Homo sapiens OX=9606 GN=UFD1	746.694	0.625808	1.54307	0.103727	6.03325	1.60694e-09	2.58637e-08	539.492	577.363	645.142	942.39	864.464	911.312
P51798	CLCN7	H(+)/Cl(-) exchange transporter 7 OS=Homo sapiens OX=9606 GN=CLCN7 PE=1 SV=2	551.363	0.622387	1.53942	0.0958078	6.4962	8.23723e-11	1.5327e-09	411.768	438.134	452.888	626.24	689.929	689.219
Q96C86	DCPS	m7GpppX diphosphatase OS=Homo sapiens OX=9606 GN=DCPS PE=1 SV=2	2193.49	0.621702	1.53869	0.18652	3.33316	0.000858643	0.00505759	1556.52	1461.42	2166.33	2517.08	2468.14	2991.48
P05556	ITGB1	Integrin beta-1 OS=Homo sapiens OX=9606 GN=ITGB1 PE=1 SV=2	9946	0.621084	1.53803	0.208547	2.97815	0.00289991	0.0140162	6346.18	8362.51	8804.06	8946.14	13054.2	14162.9
Q9H490	PIGU	Phosphatidylinositol glycan anchor biosynthesis class U protein OS=Homo sapiens OX=9606 GN=PIGU PE=1 SV=3	664.271	0.617266	1.53397	0.073894	8.3534	6.63246e-17	2.27126e-15	544.258	510.182	518.294	797.951	814.157	800.787
Q8TD19	NEK9	Serine/threonine-protein kinase Nek9 OS=Homo sapiens OX=9606 GN=NEK9 PE=1 SV=2	2380.49	0.616189	1.53282	0.144546	4.26293	2.0176e-05	0.00018091	1556.52	2064.1	2018.67	2591.83	3070.8	2981.05
Q6P996	PDXDC1	Pyridoxal-dependent decarboxylase domain-containing protein 1 OS=Homo sapiens OX=9606 GN=PDXDC1 PE=1 SV=2	544.05	0.616071	1.53269	0.0827803	7.44224	9.89923e-14	2.51902e-12	449.895	420.608	418.203	665.633	646.808	663.152
Q13042	CDC16	Cell division cycle protein 16 homolog OS=Homo sapiens OX=9606 GN=CDC16 PE=1 SV=2	4071.47	0.614334	1.53085	0.153749	3.99569	6.45074e-05	0.000513984	2827.09	2857.6	3967.97	5090.73	4956.81	4728.6
P38398-7	BRCA1	Isoform 7 of Breast cancer type 1 susceptibility protein OS=Homo sapiens OX=9606 GN=BRCA1	206.729	0.61404	1.53054	0.208588	2.9438	0.00324211	0.0154384	129.631	169.412	191.263	244.436	272.07	233.563
Q9UGY1	NOL12	Nucleolar protein 12 OS=Homo sapiens OX=9606 GN=NOL12 PE=1 SV=1	984.562	0.612154	1.52854	0.0647412	9.4554	3.21799e-21	1.52334e-19	753.955	775.983	806.675	1210.06	1200.19	1160.52
G0XQ39	STIM1	STIM1L OS=Homo sapiens OX=9606 GN=STIM1 PE=1 SV=1	4318.19	0.611138	1.52746	0.0952594	6.41551	1.40354e-10	2.57435e-09	3261.74	3573.22	3415.98	4629.13	5380.83	5648.26
O43175	PHGDH	D-3-phosphoglycerate dehydrogenase OS=Homo sapiens OX=9606 GN=PHGDH PE=1 SV=4	5314.9	0.610635	1.52693	0.063826	9.56717	1.09873e-21	5.27883e-20	4503.71	4083.4	4032.39	6557.34	6549.19	6163.35
Q9UHR4	BAIAP2L1	Brain-specific angiogenesis inhibitor 1-associated protein 2-like protein 1 OS=Homo sapiens OX=9606 GN=BAIAP2L1 PE=1 SV=2	3560.95	0.610364	1.52664	0.0373696	16.3332	5.73012e-60	1.27209e-57	2896.67	2742.72	2816.43	4295.8	4321.29	4292.76
P63279	UBE2I	SUMO-conjugating enzyme UBC9 OS=Homo sapiens OX=9606 GN=UBE2I PE=1 SV=1	5472.34	0.608185	1.52434	0.244878	2.48362	0.0130053	0.0472241	4173.92	4320.97	4512.03	4236.21	7315.09	8275.84
Q9Y4H2	IRS2	Insulin receptor substrate 2 OS=Homo sapiens OX=9606 GN=IRS2 PE=1 SV=2	1711.43	0.605102	1.52109	0.22586	2.67911	0.00738191	0.0303479	1109.49	1128.44	1835.33	2160.53	2031.8	2003.01
O43824	GTPBP6	Putative GTP-binding protein 6 OS=Homo sapiens OX=9606 GN=GTPBP6 PE=2 SV=4	1034.5	0.602985	1.51886	0.0593577	10.1585	3.03744e-24	1.70044e-22	818.77	803.245	842.351	1249.45	1263.84	1229.33
Q9HD45	TM9SF3	Transmembrane 9 superfamily member 3 OS=Homo sapiens OX=9606 GN=TM9SF3 PE=1 SV=2	2273.02	0.601707	1.51751	0.228303	2.63557	0.00839972	0.0334539	1733.81	1558.78	2124.71	1970.64	3189.89	3060.3
Q02952	AKAP12	A-kinase anchor protein 12 OS=Homo sapiens OX=9606 GN=AKAP12 PE=1 SV=4	4722.89	0.600602	1.51635	0.183117	3.27987	0.00103853	0.00589082	2756.56	4324.87	4180.04	5632.12	5534.83	5908.93
Q8NC51	SERBP1	Plasminogen activator inhibitor 1 RNA-binding protein OS=Homo sapiens OX=9606 GN=SERBP1 PE=1 SV=2	10192.7	0.598689	1.51434	0.228894	2.61557	0.00890779	0.0351184	6466.28	6561.29	11295.4	12065.2	11860.2	12907.5
Q9ULG1	INO80	Chromatin-remodeling ATPase INO80 OS=Homo sapiens OX=9606 GN=INO80 PE=1 SV=2	691.686	0.59784	1.51345	0.0784482	7.62083	2.52055e-14	6.67791e-13	582.385	544.259	524.24	827.243	833.664	838.324
Q9NRN7	AASDHPPT	L-aminoadipate-semialdehyde dehydrogenase-phosphopantetheinyl transferase OS=Homo sapiens OX=9606 GN=AASDHPPT PE=1 SV=2	2395.26	0.59734	1.51292	0.209182	2.85559	0.00429568	0.0194621	1978.77	1881.05	1859.12	2032.25	3322.33	3298.03
P42566	EPS15	Epidermal growth factor receptor substrate 15 OS=Homo sapiens OX=9606 GN=EPS15 PE=1 SV=2	3383.21	0.596458	1.512	0.198437	3.00578	0.00264905	0.0129337	2444.87	2204.3	3431.84	3537.25	4172.42	4508.6
O14929	HAT1	Histone acetyltransferase type B catalytic subunit OS=Homo sapiens OX=9606 GN=HAT1 PE=1 SV=1	1844.21	0.595486	1.51098	0.0452815	13.1508	1.68486e-39	1.90301e-37	1502.19	1467.26	1436.95	2206.99	2233.03	2218.85
P52747	ZNF143	Zinc finger protein 143 OS=Homo sapiens OX=9606 GN=ZNF143 PE=1 SV=2	1909.3	0.595394	1.51088	0.0515853	11.5419	8.10856e-31	6.07011e-29	1470.74	1538.34	1553.89	2354.46	2300.79	2237.62
Q16643	DBN1	Drebrin OS=Homo sapiens OX=9606 GN=DBN1 PE=1 SV=4	4024.57	0.594775	1.51024	0.0939999	6.3274	2.49329e-10	4.45884e-09	3250.3	3228.56	3140.48	4255.4	5210.4	5062.27
P04183	TK1	Thymidine kinase, cytosolic OS=Homo sapiens OX=9606 GN=TK1 PE=1 SV=2	1535.84	0.593975	1.5094	0.231369	2.56722	0.0102516	0.0392853	845.459	1300.77	1526.14	1779.73	1947.61	1815.33
Q8NDI1-2	EHBP1	Isoform 2 of EH domain-binding protein 1 OS=Homo sapiens OX=9606 GN=EHBP1	2364.68	0.592864	1.50824	0.04799	12.3539	4.63938e-35	4.14838e-33	1821.5	1935.58	1899.75	2791.82	2911.66	2827.78
Q9HD33	MRPL47	39S ribosomal protein L47, mitochondrial OS=Homo sapiens OX=9606 GN=MRPL47 PE=1 SV=2	1268.21	0.591031	1.50632	0.200961	2.94103	0.00327124	0.0155426	953.167	958.052	1124.79	1138.34	1719.69	1715.23
Q5T8D3	ACBD5	Acyl-CoA-binding domain-containing protein 5 OS=Homo sapiens OX=9606 GN=ACBD5 PE=1 SV=1	513.773	0.58977	1.50501	0.148933	3.95997	7.49595e-05	0.000591408	386.032	371.927	472.708	558.566	638.595	654.81
Q9Y3L3	SH3BP1	SH3 domain-binding protein 1 OS=Homo sapiens OX=9606 GN=SH3BP1 PE=1 SV=3	2903.42	0.587927	1.50309	0.0723495	8.12621	4.42922e-16	1.41867e-14	2151.3	2309.45	2499.31	3435.23	3569.76	3455.48
P30622	CLIP1	CAP-Gly domain-containing linker protein 1 OS=Homo sapiens OX=9606 GN=CLIP1 PE=1 SV=2	1771.22	0.585414	1.50047	0.0490707	11.93	8.25623e-33	6.56217e-31	1449.77	1405.92	1394.34	2179.72	2091.35	2106.24
Q96BJ3	AIDA	Axin interactor, dorsalization-associated protein OS=Homo sapiens OX=9606 GN=AIDA PE=1 SV=1	424.702	0.583082	1.49805	0.0903275	6.4552	1.08076e-10	1.99367e-09	340.28	332.008	347.842	519.173	494.859	514.047
O14681	EI24	Etoposide-induced protein 2.4 homolog OS=Homo sapiens OX=9606 GN=EI24 PE=1 SV=4	592.711	0.582398	1.49734	0.0774561	7.51908	5.51635e-14	1.43782e-12	488.974	476.105	458.834	720.176	711.489	700.689
A0A1X7SBT5	GTF3A	Transcription factor IIIA OS=Homo sapiens OX=9606 GN=GTF3A PE=1 SV=1	321.649	0.581762	1.49668	0.156739	3.71165	0.000205911	0.00146806	299.294	227.829	245.768	407.056	385.005	364.942
Q7L4I2	RSRC2	Arginine/serine-rich coiled-coil protein 2 OS=Homo sapiens OX=9606 GN=RSRC2 PE=1 SV=1	882.863	0.581173	1.49607	0.0699751	8.30543	9.94575e-17	3.33493e-15	674.842	735.091	712.53	1080.77	1055.43	1038.52
Q08380	LGALS3BP	Galectin-3-binding protein OS=Homo sapiens OX=9606 GN=LGALS3BP PE=1 SV=1	12585.1	-0.589932	0.664374	0.0268714	-21.9539	7.95187e-107	8.53236e-104	15150.6	15433	14784.8	9990.55	10037.8	10114.1
A0A2R8Y5X2	GRAMD1B	Protein Aster-B OS=Homo sapiens OX=9606 GN=GRAMD1B PE=1 SV=1	271.162	-0.590177	0.664261	0.13808	-4.27418	1.91845e-05	0.00017305	299.294	356.349	322.076	227.265	219.709	202.282
Q08431	MFGE8	Lactadherin OS=Homo sapiens OX=9606 GN=MFGE8 PE=1 SV=3	748.039	-0.604002	0.657927	0.156742	-3.85347	0.000116455	0.000886215	821.63	970.709	914.694	490.891	636.541	653.767
Q9UHK6-5	AMACR	Isoform 4 of Alpha-methylacyl-CoA racemase OS=Homo sapiens OX=9606 GN=AMACR	58.6103	-0.620229	0.650568	0.236761	-2.61965	0.00880212	0.034787	68.628	70.1014	74.3251	44.4428	46.2006	47.9638
P18146	EGR1	Early growth response protein 1 OS=Homo sapiens OX=9606 GN=EGR1 PE=1 SV=1	75.1303	-0.650868	0.636897	0.233617	-2.78604	0.00533556	0.0234473	85.785	88.6003	101.082	66.6643	53.3873	55.2626
Q86UY6	NAA40	N-alpha-acetyltransferase 40 OS=Homo sapiens OX=9606 GN=NAA40 PE=1 SV=1	887.803	-0.651762	0.636502	0.0635384	-10.2578	1.09206e-24	6.22182e-23	1085.66	1106.04	1063.34	699.975	693.009	678.792
Q6TFL4	KLHL24	Kelch-like protein 24 OS=Homo sapiens OX=9606 GN=KLHL24 PE=1 SV=1	133.827	-0.678714	0.624722	0.191669	-3.54107	0.000398503	0.00262059	146.788	184.99	162.524	112.117	100.615	95.9276
Q9BT88	SYT11	Synaptotagmin-11 OS=Homo sapiens OX=9606 GN=SYT11 PE=1 SV=2	167.274	-0.696681	0.61699	0.148002	-4.70724	2.51095e-06	2.65443e-05	194.446	216.146	210.092	124.238	125.255	133.464
Q9UHI5	SLC7A8	Large neutral amino acids transporter small subunit 2 OS=Homo sapiens OX=9606 GN=SLC7A8 PE=1 SV=1	410.882	-0.749215	0.594927	0.105185	-7.12286	1.05713e-12	2.40489e-11	481.349	549.127	515.321	307.06	310.057	302.38
P08034	GJB1	Gap junction beta-1 protein OS=Homo sapiens OX=9606 GN=GJB1 PE=1 SV=1	1915.94	-0.757465	0.591535	0.133142	-5.68917	1.27659e-08	1.86789e-07	2179.89	2624.91	2418.04	1220.16	1495.87	1556.74
Q9UF11-2	PLEKHB1	Isoform 2 of Pleckstrin homology domain-containing family B member 1 OS=Homo sapiens OX=9606 GN=PLEKHB1	3047.11	-0.776622	0.583732	0.0992865	-7.82203	5.19764e-15	1.50056e-13	3362.77	4127.22	4054.19	2242.34	2204.28	2291.84
P01009	SERPINA1	Alpha-1-antitrypsin OS=Homo sapiens OX=9606 GN=SERPINA1 PE=1 SV=3	871.838	-0.809392	0.570622	0.101706	-7.95819	1.74578e-15	5.2767e-14	1230.54	1060.28	1039.56	641.391	622.168	637.084
Q7L3T8	PARS2	Probable proline--tRNA ligase, mitochondrial OS=Homo sapiens OX=9606 GN=PARS2 PE=1 SV=1	280.958	-0.859302	0.551219	0.261159	-3.29034	0.00100065	0.00571621	409.862	385.558	291.354	238.375	211.496	149.105
P78540	ARG2	Arginase-2, mitochondrial OS=Homo sapiens OX=9606 GN=ARG2 PE=1 SV=1	3863.88	-0.907116	0.53325	0.0444013	-20.4299	9.06145e-93	6.48196e-90	4903.09	5226.45	4990.68	2652.43	2667.31	2743.32
P47929	LGALS7	Galectin-7 OS=Homo sapiens OX=9606 GN=LGALS7 PE=1 SV=2	1607.51	-1.10673	0.464346	0.0565753	-19.562	3.25849e-85	1.39855e-82	2138.91	2269.53	2178.22	1033.3	989.719	1035.39
P53794	SLC5A3	Sodium/myo-inositol cotransporter OS=Homo sapiens OX=9606 GN=SLC5A3 PE=1 SV=2	2328.45	-1.18427	0.440048	0.0437066	-27.0959	1.10174e-161	7.09302e-158	3215.98	3303.53	3182.11	1442.37	1405.52	1421.19

## Sheet: NETs-treated LoVo vs Control
Supplementary Table Quantitative proteomic analysis of NETs-treated CRC cell lines ( NETs-treated LoVo vs control, significant changed proteins )
Accession	Name	Description	baseMean	log2FoldChange	Fold Change	lfcSE	stat	pvalue	padj	Control-1	Control-2	Control-3	LoVo-1	LoVo-2	LoVo-3
Q8N5M1	ATPAF2	ATP synthase mitochondrial F1 complex assembly factor 2 OS=Homo sapiens OX=9606 GN=ATPAF2 PE=1 SV=1	294.984	4.13266	17.541	0.19352	21.3552	3.48545e-101	1.49078e-98	33.929	32.5161	28.9637	579.256	524.742	570.494
Q8NHP6	MOSPD2	Motile sperm domain-containing protein 2 OS=Homo sapiens OX=9606 GN=MOSPD2 PE=1 SV=1	935.389	3.7516	13.4692	0.383798	9.77491	1.4428e-22	6.54506e-21	131.838	120.211	135.83	891.394	2640.93	1692.13
Q86Y37	CACUL1	CDK2-associated and cullin domain-containing protein 1 OS=Homo sapiens OX=9606 GN=CACUL1 PE=1 SV=1	927.599	3.57412	11.9101	0.220814	16.1861	6.32406e-59	1.22156e-56	150.257	132.035	148.813	2154.95	1310.84	1668.69
Q17RY6	LY6K	Lymphocyte antigen 6K OS=Homo sapiens OX=9606 GN=LY6K PE=1 SV=2	142.172	3.4638	11.0334	0.232809	14.8783	4.55732e-50	5.93244e-48	22.2962	22.6628	25.9674	269.119	261.358	251.629
Q71F23	CENPU	Centromere protein U OS=Homo sapiens OX=9606 GN=CENPU PE=1 SV=1	262.426	3.34843	10.1854	0.202385	16.5448	1.74448e-61	3.48199e-59	46.5312	46.3108	47.9399	519.23	411.284	503.257
Q9Y2R0	COA3	Cytochrome c oxidase assembly factor 3 homolog, mitochondrial OS=Homo sapiens OX=9606 GN=COA3 PE=1 SV=1	231.651	3.27863	9.70432	1.12665	2.91008	0.00361339	0.015078	44.5924	47.2962	37.9524	47.0208	48.6248	1164.42
P04732	MT1E	Metallothionein-1E OS=Homo sapiens OX=9606 GN=MT1E PE=1 SV=1	560.928	3.23147	9.39223	0.200146	16.1456	1.21975e-58	2.28245e-56	101.787	121.196	100.873	974.431	1216.63	850.647
P61586	RHOA	Transforming protein RhoA OS=Homo sapiens OX=9606 GN=RHOA PE=1 SV=1	799.687	3.21767	9.30283	0.72181	4.45778	8.28141e-06	7.0777e-05	147.349	164.551	153.807	186.082	2152.66	1993.67
Q9NQP4	PFDN4	Prefoldin subunit 4 OS=Homo sapiens OX=9606 GN=PFDN4 PE=1 SV=1	308.292	3.21317	9.27387	0.162497	19.7737	5.01169e-87	1.76529e-84	69.7968	54.1935	55.9299	542.24	568.302	559.288
Q07021	C1QBP	Complement component 1 Q subcomponent-binding protein, mitochondrial OS=Homo sapiens OX=9606 GN=C1QBP PE=1 SV=1	335.409	3.13576	8.78939	1.01099	3.10168	0.00192426	0.00882946	72.705	70.9443	61.9223	79.0349	1610.7	117.155
P41223	BUD31	Protein BUD31 homolog OS=Homo sapiens OX=9606 GN=BUD31 PE=1 SV=2	892.873	3.10704	8.61616	0.238075	13.0507	6.29588e-39	6.21434e-37	188.064	184.258	184.768	1101.49	1870.03	1828.64
P16989	YBX3	Y-box-binding protein 3 OS=Homo sapiens OX=9606 GN=YBX3 PE=1 SV=4	823.969	2.67949	6.40631	0.122151	21.9359	1.17969e-106	5.88666e-104	218.115	217.759	231.709	1524.67	1272.35	1479.21
Q06413-2	MEF2C	Isoform 2 of Myocyte-specific enhancer factor 2C OS=Homo sapiens OX=9606 GN=MEF2C	134.605	2.58791	6.01226	0.827091	3.12893	0.00175446	0.00816138	38.776	37.4428	38.9511	27.0119	323.152	342.296
Q92890-1	UFD1	Isoform Long of Ubiquitin recognition factor in ER-associated degradation protein 1 OS=Homo sapiens OX=9606 GN=UFD1	619.024	2.53965	5.81449	0.457227	5.55446	2.78464e-08	3.63277e-07	200.666	162.581	181.772	409.181	1410.12	1349.83
Q9NP84	TNFRSF12A	Tumor necrosis factor receptor superfamily member 12A OS=Homo sapiens OX=9606 GN=TNFRSF12A PE=1 SV=1	480.316	2.49922	5.65381	0.131495	19.0062	1.51503e-80	4.536e-78	141.532	149.771	141.822	798.353	891.454	758.961
P42684	ABL2	Tyrosine-protein kinase ABL2 OS=Homo sapiens OX=9606 GN=ABL2 PE=1 SV=1	99.4278	2.35706	5.12327	0.237373	9.92981	3.08853e-23	1.50359e-21	31.9902	36.4575	28.9637	171.076	172.213	155.867
P00742	F10	Coagulation factor X OS=Homo sapiens OX=9606 GN=F10 PE=1 SV=2	1609.77	2.31688	4.98253	0.167817	13.806	2.34412e-43	2.75227e-41	532.201	542.921	539.324	2207.98	2555.84	3280.34
Q12800	TFCP2	Alpha-globin transcription factor CP2 OS=Homo sapiens OX=9606 GN=TFCP2 PE=1 SV=2	727.746	2.30472	4.9407	0.145835	15.8036	2.93988e-56	4.89e-54	252.044	256.188	226.716	1310.58	1035.3	1285.65
Q8IVL0	NAV3	Neuron navigator 3 OS=Homo sapiens OX=9606 GN=NAV3 PE=1 SV=3	56.66	2.22189	4.66505	0.315541	7.04154	1.90127e-12	4.15505e-11	22.2962	19.7067	17.9775	88.0389	106.367	85.5741
P02795	MT2A	Metallothionein-2 OS=Homo sapiens OX=9606 GN=MT2A PE=1 SV=1	214.184	2.20324	4.60512	0.214192	10.2863	8.1249e-25	4.4229e-23	76.5826	83.7536	68.9136	351.155	408.245	296.453
A0A2R8Y7X9	3	Uncharacterized protein OS=Homo sapiens OX=9606 PE=3 SV=1	1861.93	2.16351	4.48003	0.143705	15.0552	3.19314e-51	4.34558e-49	729.958	647.366	661.171	2911.29	2641.95	3579.85
Q9UHG3	PCYOX1	Prenylcysteine oxidase 1 OS=Homo sapiens OX=9606 GN=PCYOX1 PE=1 SV=3	712.369	2.08764	4.25052	0.133628	15.6228	5.0909e-55	7.81649e-53	273.371	265.056	275.654	1277.56	1005.92	1176.64
E7EQ69	NAA50	N-alpha-acetyltransferase 50 OS=Homo sapiens OX=9606 GN=NAA50 PE=1 SV=1	780.083	2.08455	4.24142	0.188835	11.039	2.4774e-28	1.54528e-26	295.667	289.689	307.614	1032.46	1191.31	1563.76
P02765	AHSG	Alpha-2-HS-glycoprotein OS=Homo sapiens OX=9606 GN=AHSG PE=1 SV=2	6266.68	2.02271	4.06346	0.0577283	35.0384	5.85046e-269	3.50326e-265	2616.41	2343.13	2465.91	9884.37	10274	10016.2
P26885	FKBP2	Peptidyl-prolyl cis-trans isomerase FKBP2 OS=Homo sapiens OX=9606 GN=FKBP2 PE=1 SV=2	784.599	2.01325	4.03691	0.594769	3.38493	0.000711956	0.00379963	329.596	310.381	294.63	346.153	2380.59	1046.25
O75712	GJB3	Gap junction beta-3 protein OS=Homo sapiens OX=9606 GN=GJB3 PE=1 SV=1	41.3854	1.97981	3.94442	0.333656	5.93371	2.96168e-09	4.43363e-08	15.5104	16.7507	17.9775	68.0301	62.807	67.2368
O15127	SCAMP2	Secretory carrier-associated membrane protein 2 OS=Homo sapiens OX=9606 GN=SCAMP2 PE=1 SV=2	373.648	1.95976	3.88997	0.791532	2.4759	0.01329	0.0443591	63.011	73.9003	321.597	275.122	1169.02	339.24
B4DZM6	PKMYT1	Membrane-associated tyrosine- and threonine-specific cdc2-inhibitory kinase OS=Homo sapiens OX=9606 GN=PKMYT1 PE=1 SV=1	53.0363	1.95956	3.88943	0.563923	3.47487	0.0005111	0.00284695	16.4798	23.6481	24.9687	72.0318	43.5597	137.53
Q16831	UPP1	Uridine phosphorylase 1 OS=Homo sapiens OX=9606 GN=UPP1 PE=1 SV=1	986.016	1.95291	3.87155	0.483236	4.04132	5.31514e-05	0.000382997	228.778	222.686	763.043	1635.72	1537.76	1528.11
Q9Y2T2	AP3M1	AP-3 complex subunit mu-1 OS=Homo sapiens OX=9606 GN=AP3M1 PE=1 SV=1	321.232	1.92582	3.79953	0.148058	13.0072	1.11366e-38	1.05851e-36	137.655	128.094	135.83	542.24	453.831	529.744
O94760	DDAH1	N(G),N(G)-dimethylarginine dimethylaminohydrolase 1 OS=Homo sapiens OX=9606 GN=DDAH1 PE=1 SV=3	1247.89	1.92128	3.7876	0.070761	27.1517	2.41588e-162	3.61657e-159	537.048	516.317	510.36	1918.85	1964.24	2040.53
Q13107	USP4	Ubiquitin carboxyl-terminal hydrolase 4 OS=Homo sapiens OX=9606 GN=USP4 PE=1 SV=3	245.45	1.87949	3.67944	0.198378	9.47426	2.6867e-21	1.13296e-19	119.236	101.49	93.8823	344.152	366.712	447.227
Q00765	REEP5	Receptor expression-enhancing protein 5 OS=Homo sapiens OX=9606 GN=REEP5 PE=1 SV=3	2555.28	1.85046	3.60616	0.158287	11.6906	1.424e-31	1.02734e-29	1127.41	1111.46	1089.63	4526	3132.24	4344.92
Q14197	MRPL58	Peptidyl-tRNA hydrolase ICT1, mitochondrial OS=Homo sapiens OX=9606 GN=MRPL58 PE=1 SV=1	642.467	1.83734	3.5735	0.3907	4.70268	2.56768e-06	2.3949e-05	171.584	203.965	467.414	988.437	1048.47	974.933
Q53EU6	GPAT3	Glycerol-3-phosphate acyltransferase 3 OS=Homo sapiens OX=9606 GN=GPAT3 PE=1 SV=2	117.052	1.8259	3.54529	0.203797	8.95944	3.2634e-19	1.17718e-17	53.317	51.2375	49.9374	176.078	197.538	174.204
P69905	HBA1	Hemoglobin subunit alpha OS=Homo sapiens OX=9606 GN=HBA1 PE=1 SV=2	3466.87	1.82055	3.53215	0.239729	7.59418	3.09748e-14	8.02932e-13	1621.81	1573.58	1394.25	3714.64	7202.54	5294.39
P52566	ARHGDIB	Rho GDP-dissociation inhibitor 2 OS=Homo sapiens OX=9606 GN=ARHGDIB PE=1 SV=3	1012.42	1.81304	3.51382	0.215054	8.43064	3.43791e-17	1.10678e-15	450.771	431.578	463.419	1725.76	1127.49	1875.5
O75663	TIPRL	TIP41-like protein OS=Homo sapiens OX=9606 GN=TIPRL PE=1 SV=2	183.721	1.78265	3.44057	0.606155	2.94091	0.00327248	0.0138583	77.552	80.7976	89.8873	77.0341	403.18	373.877
Q5TCX8	MAP3K21	Mitogen-activated protein kinase kinase kinase 21 OS=Homo sapiens OX=9606 GN=MAP3K21 PE=1 SV=3	325.038	1.7815	3.43783	0.462044	3.85569	0.000115403	0.000761051	88.2154	90.651	260.673	517.229	507.521	485.939
O00488	ZNF593	Zinc finger protein 593 OS=Homo sapiens OX=9606 GN=ZNF593 PE=1 SV=2	214.407	1.76635	3.40193	0.329553	5.35984	8.3294e-08	1.00965e-06	102.756	95.5777	93.8823	259.115	254.267	480.845
A0A0J9YW36	STMN3	Stathmin-3 (Fragment) OS=Homo sapiens OX=9606 GN=STMN3 PE=1 SV=1	241.536	1.74209	3.34519	0.166099	10.4882	9.7827e-26	5.47465e-24	119.236	111.343	102.871	360.159	413.31	342.296
Q9NZC3	GDE1	Glycerophosphodiester phosphodiesterase 1 OS=Homo sapiens OX=9606 GN=GDE1 PE=1 SV=1	176.938	1.73564	3.33027	0.200149	8.67174	4.25585e-18	1.45623e-16	78.5214	81.783	84.8935	296.131	228.942	291.359
Q8NFJ5	GPRC5A	Retinoic acid-induced protein 3 OS=Homo sapiens OX=9606 GN=GPRC5A PE=1 SV=2	1114.98	1.7241	3.30373	0.322241	5.35032	8.77975e-08	1.05994e-06	547.711	516.317	490.385	1246.55	2637.89	1251.01
Q9P2C4	TMEM181	Transmembrane protein 181 OS=Homo sapiens OX=9606 GN=TMEM181 PE=1 SV=2	699.183	1.689	3.22434	0.112779	14.9762	1.04981e-50	1.39695e-48	343.168	314.323	335.579	1141.5	969.456	1091.07
P35443	THBS4	Thrombospondin-4 OS=Homo sapiens OX=9606 GN=THBS4 PE=1 SV=2	406.197	1.67673	3.19703	0.106071	15.8076	2.75647e-56	4.71593e-54	199.696	188.199	192.758	627.277	605.783	623.468
P36941	LTBR	Tumor necrosis factor receptor superfamily member 3 OS=Homo sapiens OX=9606 GN=LTBR PE=1 SV=1	196.79	1.67531	3.19388	0.319626	5.24146	1.59308e-07	1.83097e-06	95.0012	91.6363	94.881	187.083	353.543	358.596
Q9UGU0	TCF20	Transcription factor 20 OS=Homo sapiens OX=9606 GN=TCF20 PE=1 SV=3	291.506	1.65697	3.15354	0.13403	12.3627	4.16146e-35	3.71923e-33	150.257	141.889	128.838	435.192	461.935	430.927
Q70UQ0	IKBIP	Inhibitor of nuclear factor kappa-B kinase-interacting protein OS=Homo sapiens OX=9606 GN=IKBIP PE=1 SV=1	624.35	1.6524	3.14357	0.330911	4.99349	5.92968e-07	6.24024e-06	221.993	216.774	465.416	886.392	981.612	973.915
P53567	CEBPG	CCAAT/enhancer-binding protein gamma OS=Homo sapiens OX=9606 GN=CEBPG PE=1 SV=1	175.41	1.64487	3.12721	0.606819	2.71065	0.00671511	0.0253917	81.4296	88.6803	84.8935	127.056	528.794	141.605
Q5EBL8-2	PDZD11	Isoform 2 of PDZ domain-containing protein 11 OS=Homo sapiens OX=9606 GN=PDZD11	170.194	1.63256	3.10064	0.159964	10.2058	1.86779e-24	9.72548e-23	84.3378	81.783	82.896	255.113	266.423	250.61
Q13042	CDC16	Cell division cycle protein 16 homolog OS=Homo sapiens OX=9606 GN=CDC16 PE=1 SV=2	802.706	1.63204	3.09951	0.554907	2.9411	0.00327048	0.0138583	200.666	186.229	788.012	1264.56	1072.78	1303.99
P00734	F2	Prothrombin OS=Homo sapiens OX=9606 GN=F2 PE=1 SV=2	1008.99	1.61471	3.06249	0.078747	20.505	1.94405e-93	7.2756e-91	510.874	477.888	501.371	1466.65	1585.37	1511.81
P05164-3	MPO	Isoform H7 of Myeloperoxidase OS=Homo sapiens OX=9606 GN=MPO	3338.3	1.61021	3.05297	0.0824959	19.5187	7.61595e-85	2.40023e-82	1519.05	1648.47	1774.77	4777.11	5100.53	5209.83
P53999	SUB1	Activated RNA polymerase II transcriptional coactivator p15 OS=Homo sapiens OX=9606 GN=SUB1 PE=1 SV=3	3029.6	1.60856	3.04947	0.279027	5.7649	8.17077e-09	1.15393e-07	888.94	1792.33	1807.73	3960.75	4880.71	4847.16
Q96BK5	PINX1	PIN2/TERF1-interacting telomerase inhibitor 1 OS=Homo sapiens OX=9606 GN=PINX1 PE=1 SV=2	1032.38	1.6013	3.03416	0.0690105	23.2036	4.18362e-119	2.27741e-116	523.476	497.595	514.355	1568.69	1563.08	1527.09
P00747	PLG	Plasminogen OS=Homo sapiens OX=9606 GN=PLG PE=1 SV=2	1419.04	1.58371	2.99739	0.0664933	23.8176	2.19573e-125	1.87829e-122	722.203	696.633	711.108	2180.96	2161.78	2041.55
A0A0A0MRC4	GPSM1	G-protein-signaling modulator 1 OS=Homo sapiens OX=9606 GN=GPSM1 PE=1 SV=2	154.117	1.55906	2.94663	0.165997	9.3921	5.8813e-21	2.41214e-19	77.552	76.8563	79.8998	223.099	234.007	233.291
A0A3B3IUA2	SNU13	NHP2-like protein 1 OS=Homo sapiens OX=9606 GN=SNU13 PE=1 SV=1	648.821	1.54976	2.92769	0.623764	2.48454	0.0129719	0.0434429	315.055	297.572	378.525	401.177	2055.41	445.189
Q8TF01	PNISR	Arginine/serine-rich protein PNISR OS=Homo sapiens OX=9606 GN=PNISR PE=1 SV=2	800.244	1.53551	2.89891	0.467858	3.282	0.00103075	0.00524988	148.318	469.02	614.23	1151.51	1280.45	1137.93
Q6AWC2-6	WWC2	Isoform 6 of Protein WWC2 OS=Homo sapiens OX=9606 GN=WWC2	148.053	1.52269	2.87327	0.496231	3.06851	0.00215126	0.00971752	76.5826	77.8416	74.9061	87.0385	283.644	288.303
Q9HCU5	PREB	Prolactin regulatory element-binding protein OS=Homo sapiens OX=9606 GN=PREB PE=1 SV=2	561.629	1.48865	2.80627	0.572095	2.60211	0.00926527	0.032887	151.226	140.903	593.256	669.296	955.274	859.816
Q96NC0	ZMAT2	Zinc finger matrin-type protein 2 OS=Homo sapiens OX=9606 GN=ZMAT2 PE=1 SV=1	648.031	1.48624	2.80158	0.334683	4.44075	8.9646e-06	7.58192e-05	271.432	266.041	485.391	1099.49	657.447	1108.39
Q14314	FGL2	Fibroleukin OS=Homo sapiens OX=9606 GN=FGL2 PE=1 SV=1	608.504	1.48205	2.79345	0.228393	6.48904	8.63876e-11	1.61149e-09	331.535	315.308	315.604	1023.45	632.122	1033
Q16787	LAMA3	Laminin subunit alpha-3 OS=Homo sapiens OX=9606 GN=LAMA3 PE=1 SV=2	57.7825	1.4694	2.76906	0.59861	2.45469	0.0141008	0.0464953	9.694	41.3842	40.9486	91.0403	68.8851	94.7427
P04114	APOB	Apolipoprotein B-100 OS=Homo sapiens OX=9606 GN=APOB PE=1 SV=2	288.814	1.46823	2.76683	0.31061	4.72693	2.27945e-06	2.1495e-05	114.389	134.006	211.734	375.166	526.768	370.821
Q9Y5Z4	HEBP2	Heme-binding protein 2 OS=Homo sapiens OX=9606 GN=HEBP2 PE=1 SV=1	436.774	1.46814	2.76665	0.10522	13.953	3.01444e-44	3.76052e-42	237.503	237.466	220.723	662.293	643.265	619.393
Q92485	SMPDL3B	Acid sphingomyelinase-like phosphodiesterase 3b OS=Homo sapiens OX=9606 GN=SMPDL3B PE=1 SV=2	547.659	1.45357	2.73885	0.0924434	15.7239	1.03735e-55	1.67883e-53	300.514	291.66	286.64	813.36	818.517	775.261
Q96JY6-5	PDLIM2	Isoform 5 of PDZ and LIM domain protein 2 OS=Homo sapiens OX=9606 GN=PDLIM2	356.5	1.44521	2.72303	0.18566	7.78419	7.01603e-15	1.901e-13	152.196	221.701	200.748	543.24	481.183	539.932
Q8N5G2	MACO1	Macoilin OS=Homo sapiens OX=9606 GN=MACO1 PE=1 SV=1	698.104	1.44454	2.72175	0.569491	2.53654	0.0111954	0.0383075	404.24	359.648	361.547	482.213	2073.64	507.332
Q14331	FRG1	Protein FRG1 OS=Homo sapiens OX=9606 GN=FRG1 PE=1 SV=1	1009.79	1.43187	2.69795	0.578188	2.47647	0.0132687	0.044313	264.646	253.232	1120.59	1344.59	1241.96	1833.73
Q9HBH0	RHOF	Rho-related GTP-binding protein RhoF OS=Homo sapiens OX=9606 GN=RHOF PE=1 SV=1	82.7433	1.42392	2.68314	0.444005	3.207	0.00134128	0.00654983	49.4394	41.3842	43.9449	62.0274	152.965	146.698
Q9Y265	RUVBL1	RuvB-like 1 OS=Homo sapiens OX=9606 GN=RUVBL1 PE=1 SV=1	3992.66	1.40194	2.64256	0.228144	6.14496	7.99837e-10	1.31578e-08	1765.28	1791.34	3020.21	5722.53	5375.06	6281.55
P54278	PMS2	Mismatch repair endonuclease PMS2 OS=Homo sapiens OX=9606 GN=PMS2 PE=1 SV=2	396.772	1.40187	2.64244	0.104253	13.4469	3.21201e-41	3.43456e-39	218.115	218.745	216.728	591.261	561.211	574.569
Q8NDD1-5	C1orf131	Isoform 2 of Uncharacterized protein C1orf131 OS=Homo sapiens OX=9606 GN=C1orf131	298.964	1.3983	2.63591	0.270375	5.1717	2.31972e-07	2.58668e-06	158.982	161.595	172.783	346.153	591.601	362.671
P15407	FOSL1	Fos-related antigen 1 OS=Homo sapiens OX=9606 GN=FOSL1 PE=1 SV=1	911.789	1.37406	2.592	0.118214	11.6236	3.12859e-31	2.17837e-29	507.966	487.742	527.339	1209.53	1481.03	1257.12
Q8N584	TTC39C	Tetratricopeptide repeat protein 39C OS=Homo sapiens OX=9606 GN=TTC39C PE=2 SV=2	128.518	1.36829	2.58165	0.563701	2.42734	0.0152102	0.0491254	81.4296	72.9149	60.9236	63.0279	225.903	266.91
A0A087X0R6	SNX12	Sorting nexin-12 OS=Homo sapiens OX=9606 GN=SNX12 PE=1 SV=1	1723.45	1.36037	2.56751	0.156072	8.7163	2.87437e-18	9.89179e-17	1020.78	944.938	932.83	2771.23	1978.42	2692.53
Q9GZN8-2	C20orf27	Isoform 2 of UPF0687 protein C20orf27 OS=Homo sapiens OX=9606 GN=C20orf27	231.749	1.3549	2.55779	0.491373	2.75737	0.0058269	0.0225689	128.93	131.05	130.836	126.056	441.675	431.945
Q53HC5	KLHL26	Kelch-like protein 26 OS=Homo sapiens OX=9606 GN=KLHL26 PE=1 SV=2	126.614	1.34614	2.54231	0.446849	3.01252	0.00259088	0.0114243	75.6132	72.9149	65.9173	119.053	297.827	128.361
P04004	VTN	Vitronectin OS=Homo sapiens OX=9606 GN=VTN PE=1 SV=1	1962.13	1.34177	2.53462	0.0577844	23.2202	2.8457e-119	1.704e-116	1130.32	1096.68	1103.62	2780.23	2919.51	2742.45
Q13444	ADAM15	Disintegrin and metalloproteinase domain-containing protein 15 OS=Homo sapiens OX=9606 GN=ADAM15 PE=1 SV=4	151.239	1.33205	2.51761	0.515867	2.58217	0.0098182	0.034502	83.3684	86.7097	87.8898	129.057	390.011	130.399
Q9BS40	LXN	Latexin OS=Homo sapiens OX=9606 GN=LXN PE=1 SV=2	815.27	1.32759	2.50983	0.0778033	17.0634	2.77668e-65	5.93812e-63	471.129	466.064	456.428	1149.51	1209.54	1138.95
P28702-3	RXRB	Isoform 2 of Retinoic acid receptor RXR-beta OS=Homo sapiens OX=9606 GN=RXRB	231.317	1.32662	2.50814	0.139488	9.51061	1.89548e-21	8.10722e-20	131.838	139.918	123.845	343.152	323.152	325.997
Q9UJM3	ERRFI1	ERBB receptor feedback inhibitor 1 OS=Homo sapiens OX=9606 GN=ERRFI1 PE=1 SV=1	208.764	1.31969	2.49612	0.140405	9.39914	5.50122e-21	2.27182e-19	120.206	119.226	118.851	308.136	291.749	294.416
U3KQT1	ESD	S-formylglutathione hydrolase (Fragment) OS=Homo sapiens OX=9606 GN=ESD PE=1 SV=1	595.514	1.31501	2.48804	0.411336	3.19692	0.00138903	0.00674026	247.197	202.979	574.28	730.323	926.909	891.397
Q99808-2	SLC29A1	Isoform 2 of Equilibrative nucleoside transporter 1 OS=Homo sapiens OX=9606 GN=SLC29A1	561	1.29982	2.46198	0.408327	3.18328	0.00145617	0.00700365	329.596	333.044	309.612	355.157	1064.68	973.915
O43909	EXTL3	Exostosin-like 3 OS=Homo sapiens OX=9606 GN=EXTL3 PE=1 SV=1	215.765	1.29928	2.46106	0.350128	3.71086	0.000206556	0.00128438	126.991	118.24	128.838	430.19	304.918	185.411
P35052	GPC1	Glypican-1 OS=Homo sapiens OX=9606 GN=GPC1 PE=1 SV=2	79.2084	1.29152	2.44786	0.50896	2.53757	0.0111626	0.0382171	45.5618	45.3255	46.9411	49.0217	163.096	125.305
Q9Y3B9	RRP15	RRP15-like protein OS=Homo sapiens OX=9606 GN=RRP15 PE=1 SV=2	505.587	1.28763	2.44127	0.426707	3.01759	0.00254789	0.0112609	311.177	291.66	278.651	316.14	1059.61	776.279
Q9H8M2	BRD9	Bromodomain-containing protein 9 OS=Homo sapiens OX=9606 GN=BRD9 PE=1 SV=2	239.874	1.28252	2.43263	0.135181	9.48745	2.36759e-21	1.00547e-19	144.441	136.962	137.827	323.143	351.516	345.353
Q9Y375	NDUFAF1	Complex I intermediate-associated protein 30, mitochondrial OS=Homo sapiens OX=9606 GN=NDUFAF1 PE=1 SV=2	273.203	1.27087	2.41307	0.152786	8.31799	8.94689e-17	2.77585e-15	163.829	158.639	157.802	417.184	339.36	402.402
Q86SJ6-2	DSG4	Isoform 2 of Desmoglein-4 OS=Homo sapiens OX=9606 GN=DSG4	553.993	1.26964	2.41101	0.295502	4.29655	1.73477e-05	0.000140376	295.667	314.323	364.543	1057.47	506.508	785.448
Q14596	NBR1	Next to BRCA1 gene 1 protein OS=Homo sapiens OX=9606 GN=NBR1 PE=1 SV=3	492.69	1.26689	2.40642	0.445444	2.8441	0.00445366	0.0180803	207.452	201.994	458.425	523.231	1037.33	527.707
Q86UX7	FERMT3	Fermitin family homolog 3 OS=Homo sapiens OX=9606 GN=FERMT3 PE=1 SV=1	94.6015	1.25766	2.39108	0.254752	4.93681	7.94107e-07	8.14232e-06	52.3476	59.1202	55.9299	126.056	160.056	114.099
O43379-4	WDR62	Isoform 4 of WD repeat-containing protein 62 OS=Homo sapiens OX=9606 GN=WDR62	306.944	1.25698	2.38995	0.474144	2.65105	0.00802413	0.0294234	114.389	111.343	317.602	336.149	453.831	508.351
P01023	A2M	Alpha-2-macroglobulin OS=Homo sapiens OX=9606 GN=A2M PE=1 SV=3	3315.31	1.25527	2.38712	0.0675524	18.5822	4.48111e-77	1.21968e-74	2001.81	1925.35	1945.56	4633.05	4973.91	4412.16
P61224	RAP1B	Ras-related protein Rap-1b OS=Homo sapiens OX=9606 GN=RAP1B PE=1 SV=1	1572.11	1.24552	2.37103	0.439167	2.83608	0.00456706	0.0184159	717.356	1069.09	1011.73	1383.61	3912.27	1338.62
Q8NI08	NCOA7	Nuclear receptor coactivator 7 OS=Homo sapiens OX=9606 GN=NCOA7 PE=1 SV=2	138.135	1.22554	2.33844	0.264203	4.63865	3.50699e-06	3.20608e-05	74.6438	83.7536	89.8873	156.069	244.137	180.317
Q9H974-4	QTRT2	Isoform 4 of Queuine tRNA-ribosyltransferase accessory subunit 2 OS=Homo sapiens OX=9606 GN=QTRT2	520.036	1.22112	2.33128	0.388417	3.14385	0.00166744	0.00783106	255.922	248.305	432.458	479.212	1086.97	617.356
Q9NUL3	STAU2	Double-stranded RNA-binding protein Staufen homolog 2 OS=Homo sapiens OX=9606 GN=STAU2 PE=1 SV=2	521.192	1.2188	2.32753	0.101318	12.0295	2.48755e-33	1.95992e-31	325.718	308.41	305.617	769.34	724.306	693.761
P31949	S100A11	Protein S100-A11 OS=Homo sapiens OX=9606 GN=S100A11 PE=1 SV=2	6082.16	1.21588	2.32282	0.161826	7.51345	5.75878e-14	1.44283e-12	3216.47	3155.05	4611.22	8453.74	8520.48	8536.02
P0CG39	POTEJ	POTE ankyrin domain family member J OS=Homo sapiens OX=9606 GN=POTEJ PE=3 SV=1	2114.14	1.21263	2.3176	0.0882739	13.7371	6.08474e-43	7.00681e-41	1334.86	1277	1211.48	2879.27	3208.22	2774.03
O76011	KRT34	Keratin, type I cuticular Ha4 OS=Homo sapiens OX=9606 GN=KRT34 PE=1 SV=2	6151.88	1.21209	2.31672	0.178832	6.77781	1.22012e-11	2.47664e-10	3516.01	3788.62	3824.2	7580.35	7160	11042.1
Q15545	TAF7	Transcription initiation factor TFIID subunit 7 OS=Homo sapiens OX=9606 GN=TAF7 PE=1 SV=1	1259.53	1.20919	2.31208	0.205988	5.8702	4.35281e-09	6.34175e-08	539.956	873.994	867.911	1790.79	1721.11	1763.44
Q9Y3B8	REXO2	Oligoribonuclease, mitochondrial OS=Homo sapiens OX=9606 GN=REXO2 PE=1 SV=3	1776.01	1.20125	2.2994	0.339646	3.53678	0.00040503	0.00231645	1118.69	1055.3	1055.68	1246.55	3218.35	2961.47
Q70CQ2	USP34	Ubiquitin carboxyl-terminal hydrolase 34 OS=Homo sapiens OX=9606 GN=USP34 PE=1 SV=2	605.821	1.19564	2.29046	0.152018	7.8651	3.68808e-15	1.01771e-13	336.382	336.985	431.459	798.353	920.831	810.916
O95445	APOM	Apolipoprotein M OS=Homo sapiens OX=9606 GN=APOM PE=1 SV=2	301.419	1.19295	2.2862	0.136453	8.74256	2.27888e-18	7.93369e-17	178.37	185.243	186.766	416.184	456.87	385.083
Q96EA4	SPDL1	Protein Spindly OS=Homo sapiens OX=9606 GN=SPDL1 PE=1 SV=2	100.261	1.19292	2.28615	0.462154	2.58121	0.00984538	0.0345772	63.011	60.1056	59.9248	91.0403	97.2495	230.235
Q9NSI2	FAM207A	Protein FAM207A OS=Homo sapiens OX=9606 GN=FAM207A PE=1 SV=2	1060.51	1.18898	2.27992	0.105083	11.3147	1.11002e-29	7.3042e-28	638.835	593.173	708.112	1430.63	1574.23	1418.08
P84022	SMAD3	Mothers against decapentaplegic homolog 3 OS=Homo sapiens OX=9606 GN=SMAD3 PE=1 SV=1	312.347	1.18527	2.27406	0.367947	3.22131	0.00127604	0.00628367	202.605	203.965	165.792	232.103	551.081	518.538
P61218	POLR2F	DNA-directed RNA polymerases I, II, and III subunit RPABC2 OS=Homo sapiens OX=9606 GN=POLR2F PE=1 SV=1	395.931	1.18456	2.27294	0.337542	3.50937	0.000449171	0.00254459	251.075	270.968	203.744	345.153	785.087	519.557
P48960	CD97	CD97 antigen OS=Homo sapiens OX=9606 GN=CD97 PE=1 SV=4	249.488	1.17768	2.26212	0.47415	2.48377	0.0130001	0.0434886	150.257	146.815	161.797	137.061	463.961	437.039
A0A1B0GUA3	KIF1BP	KIF1-binding protein OS=Homo sapiens OX=9606 GN=KIF1BP PE=1 SV=1	521.578	1.17677	2.2607	0.128448	9.16145	5.12057e-20	1.92843e-18	323.78	309.396	326.59	762.337	635.161	772.204
Q13153	PAK1	Serine/threonine-protein kinase PAK 1 OS=Homo sapiens OX=9606 GN=PAK1 PE=1 SV=2	632.505	1.17423	2.25672	0.232443	5.05168	4.37952e-07	4.71664e-06	395.515	389.208	380.523	609.269	1019.09	1001.42
O60504	SORBS3	Vinexin OS=Homo sapiens OX=9606 GN=SORBS3 PE=1 SV=2	226.992	1.16001	2.2346	0.244235	4.74958	2.03839e-06	1.94671e-05	109.542	146.815	164.793	339.15	255.28	346.371
E7ESZ7	NDUFA10	NADH dehydrogenase [ubiquinone] 1 alpha subcomplex subunit 10, mitochondrial OS=Homo sapiens OX=9606 GN=NDUFA10 PE=1 SV=1	1303.74	1.15397	2.22525	0.415666	2.77619	0.00549995	0.0215253	852.103	791.226	782.019	737.326	2151.65	2508.14
Q9P270	SLAIN2	SLAIN motif-containing protein 2 OS=Homo sapiens OX=9606 GN=SLAIN2 PE=1 SV=2	254.108	1.15192	2.22209	0.155482	7.4087	1.27545e-13	3.11729e-12	167.706	159.625	145.817	389.172	334.295	328.034
P63272	SUPT4H1	Transcription elongation factor SPT4 OS=Homo sapiens OX=9606 GN=SUPT4H1 PE=1 SV=1	1151.05	1.15182	2.22195	0.0883126	13.0426	7.00485e-39	6.76533e-37	736.744	697.619	709.111	1576.7	1704.91	1481.25
O00750	PIK3C2B	Phosphatidylinositol 4-phosphate 3-kinase C2 domain-containing subunit beta OS=Homo sapiens OX=9606 GN=PIK3C2B PE=1 SV=2	99.7953	1.15137	2.22125	0.32317	3.56274	0.000367004	0.00212125	68.8274	62.0762	54.9311	113.05	113.458	186.429
P07919	UQCRH	Cytochrome b-c1 complex subunit 6, mitochondrial OS=Homo sapiens OX=9606 GN=UQCRH PE=1 SV=2	2286.22	1.15034	2.21967	0.0609357	18.878	1.7298e-79	4.9324e-77	1416.29	1406.08	1438.2	3176.4	3282.17	2998.15
Q9UGJ1	TUBGCP4	Gamma-tubulin complex component 4 OS=Homo sapiens OX=9606 GN=TUBGCP4 PE=1 SV=1	211.123	1.14918	2.21788	0.143074	8.03205	9.5858e-16	2.7596e-14	130.869	139.918	122.846	297.131	292.762	283.209
P78417	GSTO1	Glutathione S-transferase omega-1 OS=Homo sapiens OX=9606 GN=GSTO1 PE=1 SV=2	2272.9	1.14514	2.21167	0.277214	4.13088	3.61383e-05	0.000271173	1444.41	1374.55	1427.21	1847.82	3849.46	3693.95
A0A0A0MT26	ATP1A3	Sodium/potassium-transporting ATPase subunit alpha-3 OS=Homo sapiens OX=9606 GN=ATP1A3 PE=1 SV=1	954.924	1.13541	2.19682	0.135241	8.39552	4.63851e-17	1.48532e-15	603.936	603.026	585.266	1203.53	1533.71	1200.07
P04264	KRT1	Keratin, type II cytoskeletal 1 OS=Homo sapiens OX=9606 GN=KRT1 PE=1 SV=6	1978.05	1.13474	2.19579	0.279088	4.06589	4.78497e-05	0.000348994	1720.69	846.404	1146.56	3273.45	2454.54	2426.64
B5MCA4	EPCAM	Epithelial cell adhesion molecule OS=Homo sapiens OX=9606 GN=EPCAM PE=1 SV=1	2500.27	1.13153	2.19091	0.448013	2.52567	0.0115478	0.039249	1581.09	1528.26	1592	1350.6	5756.97	3192.73
P30408	TM4SF1	Transmembrane 4 L6 family member 1 OS=Homo sapiens OX=9606 GN=TM4SF1 PE=1 SV=1	174.141	1.13006	2.18868	0.180348	6.26598	3.70477e-10	6.39313e-09	114.389	106.416	106.866	269.119	213.746	234.31
A0A1W2PS05	PIK3C3	Phosphatidylinositol 3-kinase catalytic subunit type 3 OS=Homo sapiens OX=9606 GN=PIK3C3 PE=1 SV=1	880.771	1.12805	2.18563	0.296413	3.80567	0.00014142	0.000912523	337.351	563.613	758.049	1216.54	1124.45	1284.63
P25787	PSMA2	Proteasome subunit alpha type-2 OS=Homo sapiens OX=9606 GN=PSMA2 PE=1 SV=2	1246.6	1.1206	2.17437	0.0699418	16.0219	8.98814e-58	1.63094e-55	792	794.182	770.034	1772.78	1629.94	1720.65
Q9UEU0	VTI1B	Vesicle transport through interaction with t-SNAREs homolog 1B OS=Homo sapiens OX=9606 GN=VTI1B PE=1 SV=3	1207.95	1.10911	2.15712	0.414236	2.67748	0.0074179	0.0276234	792.969	765.607	737.076	747.33	2632.83	1571.91
P19823	ITIH2	Inter-alpha-trypsin inhibitor heavy chain H2 OS=Homo sapiens OX=9606 GN=ITIH2 PE=1 SV=2	1107.49	1.1072	2.15428	0.0912228	12.1373	6.69614e-34	5.49267e-32	727.05	723.237	656.177	1511.67	1422.27	1604.51
O15525	MAFG	Transcription factor MafG OS=Homo sapiens OX=9606 GN=MAFG PE=1 SV=1	214.096	1.10691	2.15384	0.147532	7.50289	6.24266e-14	1.55754e-12	147.349	133.02	126.841	290.128	281.618	305.622
Q5H9R7-5	PPP6R3	Isoform 5 of Serine/threonine-protein phosphatase 6 regulatory subunit 3 OS=Homo sapiens OX=9606 GN=PPP6R3	901.263	1.10229	2.14695	0.100196	11.0013	3.76628e-28	2.30127e-26	583.579	581.349	553.306	1123.5	1325.02	1240.82
O75674	TOM1L1	TOM1-like protein 1 OS=Homo sapiens OX=9606 GN=TOM1L1 PE=1 SV=2	508.039	1.09177	2.13136	0.0925033	11.8025	3.78809e-32	2.90808e-30	327.657	323.191	322.595	706.312	665.551	702.93
O75509	TNFRSF21	Tumor necrosis factor receptor superfamily member 21 OS=Homo sapiens OX=9606 GN=TNFRSF21 PE=1 SV=1	165.279	1.08924	2.12762	0.348904	3.12188	0.00179699	0.00832848	100.818	108.387	107.865	165.073	332.269	177.261
Q9BVQ7	SPATA5L1	Spermatogenesis-associated protein 5-like protein 1 OS=Homo sapiens OX=9606 GN=SPATA5L1 PE=1 SV=2	513.153	1.08794	2.1257	0.0933455	11.655	2.16408e-31	1.54268e-29	346.076	319.249	319.599	704.311	699.994	689.686
Q6ZS17-4	RIPOR1	Isoform 4 of Rho family-interacting cell polarization regulator 1 OS=Homo sapiens OX=9606 GN=RIPOR1	188.219	1.08711	2.12448	0.377051	2.88319	0.00393667	0.0162571	109.542	132.035	119.85	139.061	314.035	314.79
P49721	PSMB2	Proteasome subunit beta type-2 OS=Homo sapiens OX=9606 GN=PSMB2 PE=1 SV=1	795.081	1.08017	2.11428	0.193786	5.57404	2.48904e-08	3.2829e-07	468.22	438.475	625.216	1005.44	1253.1	980.027
Q8NEF9	SRFBP1	Serum response factor-binding protein 1 OS=Homo sapiens OX=9606 GN=SRFBP1 PE=1 SV=1	561.878	1.07641	2.10879	0.31098	3.46136	0.000537456	0.00297439	375.158	357.677	351.559	442.196	947.17	897.509
Q9BSU1	C16orf70	UPF0183 protein C16orf70 OS=Homo sapiens OX=9606 GN=C16orf70 PE=1 SV=1	323.317	1.0734	2.10439	0.141419	7.59024	3.19308e-14	8.24145e-13	215.207	209.877	199.749	412.182	490.3	412.589
Q9UMD9	COL17A1	Collagen alpha-1(XVII) chain OS=Homo sapiens OX=9606 GN=COL17A1 PE=1 SV=3	45.2363	1.07138	2.10144	0.304069	3.52346	0.000425945	0.00242679	33.929	28.5748	24.9687	61.027	61.794	61.1244
Q8NFH3	NUP43	Nucleoporin Nup43 OS=Homo sapiens OX=9606 GN=NUP43 PE=1 SV=1	1222.5	1.07044	2.10007	0.193339	5.53658	3.08437e-08	4.01504e-07	818.174	821.771	726.089	1489.66	2107.07	1372.24
P02042	HBD	Hemoglobin subunit delta OS=Homo sapiens OX=9606 GN=HBD PE=1 SV=2	2050.07	1.06254	2.08861	0.0691868	15.3576	3.1516e-53	4.38878e-51	1371.7	1329.22	1281.39	2710.2	2932.68	2675.21
P51798	CLCN7	H(+)/Cl(-) exchange transporter 7 OS=Homo sapiens OX=9606 GN=CLCN7 PE=1 SV=2	1057.5	1.04942	2.0697	0.086377	12.1493	5.78498e-34	4.87894e-32	664.039	668.058	735.078	1422.63	1496.22	1359
P26447	S100A4	Protein S100-A4 OS=Homo sapiens OX=9606 GN=S100A4 PE=1 SV=1	2294.39	1.0464	2.06536	0.149596	6.99483	2.65587e-12	5.72063e-11	1571.4	1532.2	1387.26	2810.24	3725.87	2739.39
Q6NUM9	RETSAT	All-trans-retinol 13,14-reductase OS=Homo sapiens OX=9606 GN=RETSAT PE=1 SV=2	1551.22	1.04631	2.06525	0.228783	4.57339	4.79888e-06	4.30175e-05	1050.83	1026.72	958.797	1439.64	2616.62	2214.74
O43790	KRT86	Keratin, type II cuticular Hb6 OS=Homo sapiens OX=9606 GN=KRT86 PE=1 SV=1	532.586	1.03969	2.05578	0.167921	6.19154	5.95792e-10	1.0078e-08	286.942	376.399	382.52	695.307	794.204	660.143
Q8N0Z6	TTC5	Tetratricopeptide repeat protein 5 OS=Homo sapiens OX=9606 GN=TTC5 PE=1 SV=2	407.951	1.03897	2.05476	0.247164	4.20358	2.62724e-05	0.00020195	181.278	301.513	318.6	560.248	524.742	561.325
P05556	ITGB1	Integrin beta-1 OS=Homo sapiens OX=9606 GN=ITGB1 PE=1 SV=2	4921.46	1.03755	2.05274	0.216524	4.79186	1.65241e-06	1.60367e-05	2662.94	3394.49	3615.47	4793.12	7093.14	7969.6
Q96PV6	LENG8	Leukocyte receptor cluster member 8 OS=Homo sapiens OX=9606 GN=LENG8 PE=1 SV=3	220.491	1.03749	2.05265	0.157533	6.58584	4.52328e-11	8.62592e-10	131.838	147.801	153.807	282.125	324.165	283.209
Q96RU2-2	USP28	Isoform 2 of Ubiquitin carboxyl-terminal hydrolase 28 OS=Homo sapiens OX=9606 GN=USP28	493.717	1.03693	2.05186	0.229675	4.51478	6.33825e-06	5.5732e-05	272.401	354.721	343.569	524.232	831.686	635.693
Q9BVC6	TMEM109	Transmembrane protein 109 OS=Homo sapiens OX=9606 GN=TMEM109 PE=1 SV=1	1750.9	1.03445	2.04833	0.157584	6.56442	5.22361e-11	9.92983e-10	1131.29	1181.42	1133.58	2157.95	2880	2021.18
P51398	DAP3	28S ribosomal protein S29, mitochondrial OS=Homo sapiens OX=9606 GN=DAP3 PE=1 SV=1	1289.3	1.03281	2.04601	0.206464	5.00238	5.66276e-07	5.98035e-06	834.654	873.994	830.958	1239.55	2007.8	1948.85
P13804	ETFA	Electron transfer flavoprotein subunit alpha, mitochondrial OS=Homo sapiens OX=9606 GN=ETFA PE=1 SV=1	2639.34	1.0319	2.04472	0.0572911	18.0116	1.58103e-72	3.94467e-70	1756.55	1693.79	1750.8	3520.56	3699.53	3414.81
Q14258	TRIM25	E3 ubiquitin/ISG15 ligase TRIM25 OS=Homo sapiens OX=9606 GN=TRIM25 PE=1 SV=2	1714.76	1.02618	2.03663	0.37138	2.76316	0.00572453	0.0222443	519.599	1376.52	1492.13	2114.94	2457.58	2327.82
Q9NZM5	NOP53	Ribosome biogenesis protein NOP53 OS=Homo sapiens OX=9606 GN=NOP53 PE=1 SV=2	294.744	1.01968	2.02747	0.195438	5.21738	1.8147e-07	2.05804e-06	211.329	204.95	167.79	380.168	462.948	341.278
P17655	CAPN2	Calpain-2 catalytic subunit OS=Homo sapiens OX=9606 GN=CAPN2 PE=1 SV=6	1945.48	1.01685	2.0235	0.155912	6.52193	6.94076e-11	1.30696e-09	1240.83	1156.79	1463.16	2438.08	2312.72	3061.31
Q5RKV6	EXOSC6	Exosome complex component MTR3 OS=Homo sapiens OX=9606 GN=EXOSC6 PE=1 SV=1	1939.34	1.01584	2.02208	0.186841	5.43693	5.42076e-08	6.80493e-07	1154.56	1155.8	1540.07	2152.95	3056.27	2576.39
P21580	TNFAIP3	Tumor necrosis factor alpha-induced protein 3 OS=Homo sapiens OX=9606 GN=TNFAIP3 PE=1 SV=1	102.499	1.01367	2.01904	0.193879	5.22834	1.71035e-07	1.94707e-06	70.7662	67.0029	65.9173	140.062	133.718	137.53
Q9Y6M7-7	SLC4A7	Isoform 7 of Sodium bicarbonate cotransporter 3 OS=Homo sapiens OX=9606 GN=SLC4A7	1954.97	1.01102	2.01533	0.0581055	17.3996	8.30109e-68	1.841e-65	1276.7	1262.22	1351.31	2552.13	2667.27	2620.2
Q9UGY1	NOL12	Nucleolar protein 12 OS=Homo sapiens OX=9606 GN=NOL12 PE=1 SV=1	272.296	1.00925	2.01286	0.134136	7.52409	5.30888e-14	1.34133e-12	183.217	186.229	172.783	371.164	336.321	384.065
Q15428	SF3A2	Splicing factor 3A subunit 2 OS=Homo sapiens OX=9606 GN=SF3A2 PE=1 SV=2	1830.37	1.00759	2.01055	0.25064	4.02008	5.81787e-05	0.000413746	781.337	1447.46	1419.22	2328.03	2691.58	2314.58
Q8N511	TMEM199	Transmembrane protein 199 OS=Homo sapiens OX=9606 GN=TMEM199 PE=1 SV=1	390.443	1.00668	2.00928	0.175801	5.72624	1.02681e-08	1.43323e-07	267.554	255.202	255.679	508.225	437.623	618.375
P07093-3	SERPINE2	Isoform 3 of Glia-derived nexin OS=Homo sapiens OX=9606 GN=SERPINE2	2419.21	1.0049	2.0068	0.0991223	10.138	3.74809e-24	1.902e-22	1645.07	1596.25	1586.01	2953.31	3116.04	3618.56
P17275	JUNB	Transcription factor jun-B OS=Homo sapiens OX=9606 GN=JUNB PE=1 SV=1	1728.18	1.00176	2.00244	0.059838	16.7412	6.56146e-63	1.35483e-60	1187.52	1117.37	1148.56	2308.02	2367.42	2240.21
Q9BSQ5-2	CCM2	Isoform 2 of Cerebral cavernous malformations 2 protein OS=Homo sapiens OX=9606 GN=CCM2	179.351	0.985591	1.98012	0.326618	3.01756	0.00254817	0.0112609	125.053	125.138	110.861	150.066	253.254	311.734
P52701	MSH6	DNA mismatch repair protein Msh6 OS=Homo sapiens OX=9606 GN=MSH6 PE=1 SV=2	566.129	0.984153	1.97815	0.30902	3.18475	0.00144878	0.00697372	316.994	318.264	505.366	595.263	1021.12	639.768
P08648	ITGA5	Integrin alpha-5 OS=Homo sapiens OX=9606 GN=ITGA5 PE=1 SV=2	359.2	0.983601	1.9774	0.18138	5.42287	5.8648e-08	7.34695e-07	228.778	242.393	252.683	422.187	433.571	575.588
Q9NS91	RAD18	E3 ubiquitin-protein ligase RAD18 OS=Homo sapiens OX=9606 GN=RAD18 PE=1 SV=2	1006.98	0.981062	1.97392	0.11342	8.64982	5.15825e-18	1.73526e-16	750.316	680.868	600.247	1401.62	1287.54	1321.3
P17301	ITGA2	Integrin alpha-2 OS=Homo sapiens OX=9606 GN=ITGA2 PE=1 SV=1	2928.52	0.978014	1.96975	0.15248	6.41404	1.41709e-10	2.57918e-09	2037.68	1921.41	1957.54	3269.45	4726.73	3658.29
Q6XZF7	DNMBP	Dynamin-binding protein OS=Homo sapiens OX=9606 GN=DNMBP PE=1 SV=1	921.711	0.975833	1.96678	0.084452	11.5549	6.97457e-31	4.80043e-29	635.927	618.792	609.236	1164.51	1302.74	1199.06
Q02818	NUCB1	Nucleobindin-1 OS=Homo sapiens OX=9606 GN=NUCB1 PE=1 SV=4	2024.36	0.968894	1.95734	0.116654	8.3057	9.92328e-17	3.06287e-15	1163.28	1485.89	1458.17	2662.18	2752.36	2624.27
Q6P2D0	ZFP1	Zinc finger protein 1 homolog OS=Homo sapiens OX=9606 GN=ZFP1 PE=1 SV=2	116.359	0.967691	1.95571	0.232023	4.17067	3.03701e-05	0.000231075	81.4296	76.8563	77.9023	158.07	125.614	178.279
Q9Y3L3	SH3BP1	SH3 domain-binding protein 1 OS=Homo sapiens OX=9606 GN=SH3BP1 PE=1 SV=3	1204.44	0.96539	1.95259	0.204366	4.72382	2.31457e-06	2.17236e-05	699.907	889.759	857.924	1272.56	1989.56	1516.9
Q96PY5-3	FMNL2	Isoform 2 of Formin-like protein 2 OS=Homo sapiens OX=9606 GN=FMNL2	574.701	0.962361	1.9485	0.098563	9.76391	1.60825e-22	7.24076e-21	387.76	392.164	389.511	728.322	734.436	816.01
Q96G23	CERS2	Ceramide synthase 2 OS=Homo sapiens OX=9606 GN=CERS2 PE=1 SV=1	958.777	0.960274	1.94568	0.0708673	13.5503	7.88988e-42	8.58993e-40	653.376	645.396	654.18	1279.57	1300.71	1219.43
O14841	OPLAH	5-oxoprolinase OS=Homo sapiens OX=9606 GN=OPLAH PE=1 SV=3	288.18	0.959299	1.94437	0.342617	2.79992	0.00511154	0.0202433	206.482	203.965	176.778	277.123	572.354	292.378
O94907	DKK1	Dickkopf-related protein 1 OS=Homo sapiens OX=9606 GN=DKK1 PE=1 SV=1	318.063	0.958442	1.94321	0.221776	4.32166	1.54862e-05	0.000126165	185.155	229.584	233.707	354.157	520.69	385.083
Q9H4P4	RNF41	E3 ubiquitin-protein ligase NRDP1 OS=Homo sapiens OX=9606 GN=RNF41 PE=1 SV=2	246.761	0.958394	1.94315	0.378436	2.53251	0.0113248	0.0386477	118.267	121.196	263.669	306.135	369.751	301.547
Q16690	DUSP5	Dual specificity protein phosphatase 5 OS=Homo sapiens OX=9606 GN=DUSP5 PE=1 SV=2	169.419	0.950544	1.9326	0.211855	4.48677	7.23117e-06	6.25726e-05	107.603	120.211	118.851	249.11	180.317	240.422
A0A2R8YE63	EPS8	Epidermal growth factor receptor kinase substrate 8 OS=Homo sapiens OX=9606 GN=EPS8 PE=1 SV=1	3180.79	0.946834	1.92764	0.134827	7.02258	2.17809e-12	4.7427e-11	2021.2	1948.01	2549.8	4468.98	3818.06	4278.7
O43597	SPRY2	Protein sprouty homolog 2 OS=Homo sapiens OX=9606 GN=SPRY2 PE=1 SV=1	463.07	0.945483	1.92583	0.112023	8.44008	3.17116e-17	1.02643e-15	331.535	306.44	311.609	627.277	639.213	562.344
Q07352	ZFP36L1	mRNA decay activator protein ZFP36L1 OS=Homo sapiens OX=9606 GN=ZFP36L1 PE=1 SV=1	510.218	0.94505	1.92526	0.129781	7.2819	3.29156e-13	7.66921e-12	342.198	352.751	351.559	615.272	759.762	639.768
A8K2U0	A2ML1	Alpha-2-macroglobulin-like protein 1 OS=Homo sapiens OX=9606 GN=A2ML1 PE=1 SV=3	430.44	0.93562	1.91271	0.124458	7.51759	5.57956e-14	1.4038e-12	298.575	309.396	278.651	542.24	620.979	532.801
Q9UBC9	SPRR3	Small proline-rich protein 3 OS=Homo sapiens OX=9606 GN=SPRR3 PE=1 SV=2	180.786	0.931281	1.90697	0.153779	6.05597	1.3957e-09	2.21683e-08	121.175	124.152	127.84	230.102	254.267	227.179
Q86T24	ZBTB33	Transcriptional regulator Kaiso OS=Homo sapiens OX=9606 GN=ZBTB33 PE=1 SV=2	131.024	0.930368	1.90576	0.352217	2.64146	0.00825497	0.0300311	70.7662	66.0176	133.832	171.076	159.043	185.411
Q9NZL4-3	HSPBP1	Isoform 3 of Hsp70-binding protein 1 OS=Homo sapiens OX=9606 GN=HSPBP1	1602.09	0.929822	1.90504	0.0592193	15.7013	1.48127e-55	2.33418e-53	1077	1110.47	1121.59	2085.92	2168.87	2048.68
O15194	CTDSPL	CTD small phosphatase-like protein OS=Homo sapiens OX=9606 GN=CTDSPL PE=1 SV=2	266.018	0.92903	1.904	0.221353	4.19706	2.70402e-05	0.000207585	177.4	167.507	204.743	348.154	277.566	420.739
Q5TDF0	NTPCR	Cancer-related nucleoside-triphosphatase OS=Homo sapiens OX=9606 GN=NTPCR PE=1 SV=1	413.884	0.928314	1.90305	0.162545	5.71113	1.12227e-08	1.5592e-07	260.769	254.217	340.573	569.252	536.898	521.594
Q6PJI9	WDR59	GATOR complex protein WDR59 OS=Homo sapiens OX=9606 GN=WDR59 PE=1 SV=2	184.319	0.926014	1.90002	0.351452	2.63482	0.00841817	0.0305318	90.1542	99.519	191.759	256.113	224.89	243.479
Q6ZU80	CEP128	Centrosomal protein of 128 kDa OS=Homo sapiens OX=9606 GN=CEP128 PE=1 SV=2	417.784	0.915982	1.88685	0.287823	3.18245	0.00146034	0.00701139	279.187	305.454	283.644	342.151	645.291	650.974
P29374	ARID4A	AT-rich interactive domain-containing protein 4A OS=Homo sapiens OX=9606 GN=ARID4A PE=1 SV=3	377.601	0.911244	1.88067	0.114286	7.97335	1.54432e-15	4.34151e-14	262.707	257.173	266.666	524.232	493.339	461.489
Q15369	ELOC	Elongin-C OS=Homo sapiens OX=9606 GN=ELOC PE=1 SV=1	994.281	0.908617	1.87724	0.281153	3.23175	0.00123033	0.00608616	574.854	625.689	872.905	898.397	1664.38	1329.45
Q9Y5X2	SNX8	Sorting nexin-8 OS=Homo sapiens OX=9606 GN=SNX8 PE=1 SV=1	386.145	0.908476	1.87706	0.330383	2.74976	0.00596382	0.0230099	267.554	265.056	272.658	297.131	697.968	516.501
Q00653	NFKB2	Nuclear factor NF-kappa-B p100 subunit OS=Homo sapiens OX=9606 GN=NFKB2 PE=1 SV=4	1809.68	0.906417	1.87438	0.113489	7.98684	1.38436e-15	3.96629e-14	1186.55	1142.01	1449.18	2380.05	2378.56	2321.71
P02787	TF	Serotransferrin OS=Homo sapiens OX=9606 GN=TF PE=1 SV=3	1787.22	0.905293	1.87292	0.0804101	11.2585	2.10418e-29	1.36955e-27	1308.69	1192.26	1231.46	2278.01	2489.99	2222.89
A0A0A0MSG2	FHL2	Four and a half LIM domains protein 2 OS=Homo sapiens OX=9606 GN=FHL2 PE=1 SV=1	2543.45	0.901083	1.86747	0.0918837	9.80678	1.05272e-22	4.84898e-21	1785.64	1773.61	1762.79	3348.48	3614.44	2975.74
F8W130	TROAP	Tastin OS=Homo sapiens OX=9606 GN=TROAP PE=1 SV=1	287.466	0.899986	1.86605	0.229398	3.92325	8.73636e-05	0.000595824	192.911	188.199	220.723	337.149	476.117	309.697
Q9UEW8	STK39	STE20/SPS1-related proline-alanine-rich protein kinase OS=Homo sapiens OX=9606 GN=STK39 PE=1 SV=3	448.96	0.892885	1.85689	0.336517	2.65332	0.00797052	0.0292926	316.994	318.264	307.614	329.146	795.217	626.525
Q15493	RGN	Regucalcin OS=Homo sapiens OX=9606 GN=RGN PE=1 SV=1	43.557	0.891512	1.85512	0.321192	2.77564	0.00550934	0.0215479	31.0208	30.5454	29.9624	52.023	67.8721	49.9182
P05067	APP	Amyloid-beta precursor protein OS=Homo sapiens OX=9606 GN=APP PE=1 SV=3	347.19	0.886614	1.84883	0.268974	3.29628	0.000979759	0.00503588	248.166	247.32	235.704	391.173	342.399	618.375
P50148	GNAQ	Guanine nucleotide-binding protein G(q) subunit alpha OS=Homo sapiens OX=9606 GN=GNAQ PE=1 SV=4	316.339	0.886577	1.84878	0.113136	7.83636	4.6379e-15	1.26811e-13	228.778	219.73	217.727	424.188	405.206	402.402
Q15742	NAB2	NGFI-A-binding protein 2 OS=Homo sapiens OX=9606 GN=NAB2 PE=1 SV=1	392.869	0.882947	1.84414	0.341623	2.58457	0.00975016	0.0343032	278.218	275.894	274.656	280.124	656.434	591.887
P51148-2	RAB5C	Isoform 2 of Ras-related protein Rab-5C OS=Homo sapiens OX=9606 GN=RAB5C	1785.21	0.879907	1.84026	0.0645458	13.6323	2.57375e-42	2.854e-40	1255.37	1242.51	1273.4	2370.05	2188.11	2381.81
Q9HC38-2	GLOD4	Isoform 2 of Glyoxalase domain-containing protein 4 OS=Homo sapiens OX=9606 GN=GLOD4	3476.07	0.87772	1.83747	0.152219	5.76617	8.10909e-09	1.14793e-07	2219.93	2125.37	3005.23	4341.92	4429.92	4734.08
Q6SPF0	SAMD1	Atherin OS=Homo sapiens OX=9606 GN=SAMD1 PE=1 SV=1	301.755	0.874591	1.83349	0.330215	2.64855	0.0080837	0.0295514	163.829	159.625	315.604	367.162	447.753	356.559
Q03393	PTS	6-pyruvoyl tetrahydrobiopterin synthase OS=Homo sapiens OX=9606 GN=PTS PE=1 SV=1	231.439	0.869499	1.82703	0.348995	2.49144	0.0127226	0.0426796	165.767	160.61	164.793	168.074	365.699	363.69
P18859-2	ATP5PF	Isoform 2 of ATP synthase-coupling factor 6, mitochondrial OS=Homo sapiens OX=9606 GN=ATP5PF	1464.72	0.865521	1.822	0.266552	3.2471	0.00116587	0.00583228	809.449	823.742	1481.14	1760.78	2122.27	1790.94
P13727	PRG2	Bone marrow proteoglycan OS=Homo sapiens OX=9606 GN=PRG2 PE=1 SV=2	122.688	0.864848	1.82115	0.321472	2.69027	0.00713943	0.0268199	84.3378	86.7097	89.8873	129.057	221.85	124.286
P62318	SNRPD3	Small nuclear ribonucleoprotein Sm D3 OS=Homo sapiens OX=9606 GN=SNRPD3 PE=1 SV=1	1083.91	0.86195	1.81749	0.22101	3.90004	9.6175e-05	0.000649263	774.551	766.592	767.038	978.433	1505.34	1711.48
P02786	TFRC	Transferrin receptor protein 1 OS=Homo sapiens OX=9606 GN=TFRC PE=1 SV=2	13890.1	0.861789	1.81729	0.0364994	23.611	2.97064e-123	2.22352e-120	10152.5	9742.03	9686.85	17987	17602.2	18170.2
P02788	LTF	Lactotransferrin OS=Homo sapiens OX=9606 GN=LTF PE=1 SV=6	37.8586	0.861679	1.81715	0.328935	2.6196	0.00880319	0.0315839	30.0514	28.5748	21.9724	48.0212	50.6508	47.8807
Q6L8Q7	PDE12	2',5'-phosphodiesterase 12 OS=Homo sapiens OX=9606 GN=PDE12 PE=1 SV=2	448.139	0.859248	1.81409	0.104697	8.20698	2.26822e-16	6.79106e-15	335.412	312.352	307.614	560.248	607.809	565.4
Q12849	GRSF1	G-rich sequence factor 1 OS=Homo sapiens OX=9606 GN=GRSF1 PE=1 SV=3	2338.84	0.856412	1.81053	0.160998	5.31941	1.04107e-07	1.23689e-06	1683.85	1668.18	1640.94	2797.24	2524.44	3718.4
A0A0S2Z4L3	PROS1	Protein S isoform 2 (Fragment) OS=Homo sapiens OX=9606 GN=PROS1 PE=1 SV=1	157.746	0.856161	1.81021	0.19997	4.28144	1.85691e-05	0.000148454	106.634	112.328	117.852	180.08	238.059	191.523
O95274	LYPD3	Ly6/PLAUR domain-containing protein 3 OS=Homo sapiens OX=9606 GN=LYPD3 PE=1 SV=2	48.3904	0.855832	1.8098	0.312199	2.7413	0.00611957	0.023535	33.929	38.4281	30.9612	56.0248	73.9502	57.0494
J3KQR7	CEP170B	Centrosomal protein of 170 kDa protein B OS=Homo sapiens OX=9606 GN=CEP170B PE=1 SV=1	252.008	0.853959	1.80745	0.234477	3.64198	0.00027055	0.00161843	150.257	152.727	235.704	319.141	327.204	327.015
Q92520	FAM3C	Protein FAM3C OS=Homo sapiens OX=9606 GN=FAM3C PE=1 SV=1	895.95	0.853896	1.80737	0.289914	2.94534	0.00322597	0.0137195	628.171	641.454	645.191	685.303	1347.31	1428.27
P61244	MAX	Protein max OS=Homo sapiens OX=9606 GN=MAX PE=1 SV=1	1663.51	0.852686	1.80586	0.27158	3.13973	0.00169105	0.00792334	902.512	942.968	1711.85	2076.92	2373.5	1973.3
Q8IYQ7	THNSL1	Threonine synthase-like 1 OS=Homo sapiens OX=9606 GN=THNSL1 PE=1 SV=2	927.637	0.850174	1.80272	0.313419	2.71258	0.00667615	0.0253018	650.468	657.22	678.149	665.294	1428.35	1486.34
P01344-3	IGF2	Isoform 3 of Insulin-like growth factor II OS=Homo sapiens OX=9606 GN=IGF2	204.097	0.849684	1.80211	0.157623	5.3906	7.02214e-08	8.65198e-07	153.165	134.006	149.812	241.107	281.618	264.872
Q5SXM2	SNAPC4	snRNA-activating protein complex subunit 4 OS=Homo sapiens OX=9606 GN=SNAPC4 PE=1 SV=1	127.735	0.849562	1.80195	0.285605	2.9746	0.00293367	0.0126836	93.0624	99.519	80.8985	117.052	186.395	189.485
Q96C19	EFHD2	EF-hand domain-containing protein D2 OS=Homo sapiens OX=9606 GN=EFHD2 PE=1 SV=1	1451.36	0.843778	1.79474	0.310149	2.72056	0.00651712	0.0247655	1056.65	1041.5	1017.72	1042.46	2499.11	2050.72
Q9NWK9	ZNHIT6	Box C/D snoRNA protein 1 OS=Homo sapiens OX=9606 GN=ZNHIT6 PE=1 SV=1	591.249	0.842528	1.79319	0.213575	3.94489	7.98376e-05	0.00055396	415.873	422.71	431.459	736.326	580.458	960.671
Q9UKB1	FBXW11	F-box/WD repeat-containing protein 11 OS=Homo sapiens OX=9606 GN=FBXW11 PE=1 SV=1	153.29	0.840227	1.79033	0.167876	5.00504	5.58518e-07	5.9193e-06	113.42	115.284	100.873	204.09	185.382	200.692
Q9NRA8-3	EIF4ENIF1	Isoform 3 of Eukaryotic translation initiation factor 4E transporter OS=Homo sapiens OX=9606 GN=EIF4ENIF1	435.631	0.832101	1.78028	0.0945012	8.8052	1.30625e-18	4.60107e-17	310.208	313.337	316.603	557.246	567.289	549.1
A0A075B749	PDE4DIP	Myomegalin OS=Homo sapiens OX=9606 GN=PDE4DIP PE=1 SV=2	137.392	0.83198	1.78013	0.272497	3.05317	0.0022644	0.0101339	92.093	95.5777	108.863	146.065	228.942	152.811
Q9Y692	GMEB1	Glucocorticoid modulatory element-binding protein 1 OS=Homo sapiens OX=9606 GN=GMEB1 PE=1 SV=2	288.238	0.828756	1.77615	0.123189	6.72753	1.72563e-11	3.44436e-10	211.329	210.862	200.748	375.166	383.933	347.39
Q14C86-6	GAPVD1	Isoform 6 of GTPase-activating protein and VPS9 domain-containing protein 1 OS=Homo sapiens OX=9606 GN=GAPVD1	4199.55	0.820763	1.76634	0.234073	3.50645	0.00045413	0.00257026	2472.94	2419	4216.71	5050.23	5887.65	5150.75
A0A1B0GW05	DPY19L1	Probable C-mannosyltransferase DPY19L1 OS=Homo sapiens OX=9606 GN=DPY19L1 PE=1 SV=1	609.928	0.820762	1.76634	0.112193	7.31564	2.56154e-13	6.0867e-12	392.607	468.035	462.42	780.345	805.348	750.811
Q8WXH0-2	SYNE2	Isoform 2 of Nesprin-2 OS=Homo sapiens OX=9606 GN=SYNE2	183.335	0.820445	1.76595	0.306007	2.68113	0.00733738	0.0274259	107.603	107.402	182.771	257.114	192.473	252.647
O94817	ATG12	Ubiquitin-like protein ATG12 OS=Homo sapiens OX=9606 GN=ATG12 PE=1 SV=1	490.761	0.819591	1.76491	0.114645	7.14895	8.74463e-13	1.96853e-11	354.801	361.619	348.563	660.292	565.263	654.031
P49755	TMED10	Transmembrane emp24 domain-containing protein 10 OS=Homo sapiens OX=9606 GN=TMED10 PE=1 SV=2	2190.61	0.819546	1.76485	0.320265	2.55896	0.0104986	0.0363805	1583.03	1558.8	1611.98	1563.69	2774.65	4051.53
J3KPT4	TRABD	TraB domain-containing protein OS=Homo sapiens OX=9606 GN=TRABD PE=1 SV=1	1661.18	0.817164	1.76194	0.317224	2.57599	0.0099955	0.0350223	887.001	862.17	1859.67	2228.99	1924.73	2204.55
E9PF82	CAMK2D	Calcium/calmodulin-dependent protein kinase type II subunit delta OS=Homo sapiens OX=9606 GN=CAMK2D PE=1 SV=1	488.593	0.812078	1.75574	0.10832	7.497	6.52965e-14	1.62239e-12	367.403	352.751	343.569	601.266	672.642	593.925
P56199	ITGA1	Integrin alpha-1 OS=Homo sapiens OX=9606 GN=ITGA1 PE=1 SV=2	472.596	0.809604	1.75273	0.310369	2.60852	0.00909354	0.0324506	256.891	274.909	498.375	504.223	677.708	623.468
Q8WTT2	NOC3L	Nucleolar complex protein 3 homolog OS=Homo sapiens OX=9606 GN=NOC3L PE=1 SV=1	3004.84	0.804819	1.74693	0.13657	5.89308	3.79056e-09	5.5632e-08	2011.51	1927.32	2624.71	3734.65	3845.41	3885.47
Q9BU61	NDUFAF3	NADH dehydrogenase [ubiquinone] 1 alpha subcomplex assembly factor 3 OS=Homo sapiens OX=9606 GN=NDUFAF3 PE=1 SV=1	561.101	0.803152	1.74491	0.181902	4.41531	1.00867e-05	8.42389e-05	408.118	411.871	406.49	631.279	884.363	624.487
P02749	APOH	Beta-2-glycoprotein 1 OS=Homo sapiens OX=9606 GN=APOH PE=1 SV=3	1167.74	0.801822	1.7433	0.0728101	11.0125	3.32628e-28	2.05338e-26	811.388	879.906	862.918	1541.68	1445.57	1464.95
Q86WZ6	ZNF227	Zinc finger protein 227 OS=Homo sapiens OX=9606 GN=ZNF227 PE=1 SV=1	79.5425	0.799661	1.74069	0.246265	3.24716	0.00116563	0.00583228	59.1334	64.0469	50.9361	101.045	112.445	89.649
P23470	PTPRG	Receptor-type tyrosine-protein phosphatase gamma OS=Homo sapiens OX=9606 GN=PTPRG PE=1 SV=4	303.359	0.79579	1.73603	0.201943	3.94067	8.12545e-05	0.000560924	229.748	216.774	218.726	428.189	297.827	428.889
Q8WXX5	DNAJC9	DnaJ homolog subfamily C member 9 OS=Homo sapiens OX=9606 GN=DNAJC9 PE=1 SV=1	997.417	0.795497	1.73568	0.283846	2.80256	0.00506984	0.0201181	746.438	740.973	700.122	769.34	1633.99	1393.64
P55209	NAP1L1	Nucleosome assembly protein 1-like 1 OS=Homo sapiens OX=9606 GN=NAP1L1 PE=1 SV=1	3200.94	0.78955	1.72854	0.103943	7.59599	3.05456e-14	7.95249e-13	2460.34	2337.22	2241.19	4458.97	3585.06	4122.84
Q6PJT7	ZC3H14	Zinc finger CCCH domain-containing protein 14 OS=Homo sapiens OX=9606 GN=ZC3H14 PE=1 SV=1	2199.84	0.786886	1.72535	0.32236	2.44101	0.014646	0.0477412	1448.28	1463.23	1931.58	2063.91	4277.97	2014.05
Q8NEC7	GSTCD	Glutathione S-transferase C-terminal domain-containing protein OS=Homo sapiens OX=9606 GN=GSTCD PE=1 SV=2	215.715	0.784894	1.72297	0.281003	2.79319	0.00521917	0.0206014	162.859	160.61	151.81	182.081	322.139	314.79
P08670	VIM	Vimentin OS=Homo sapiens OX=9606 GN=VIM PE=1 SV=4	8697.61	0.777232	1.71384	0.0757609	10.259	1.07811e-24	5.81596e-23	6427.12	6361.34	6440.92	10162.5	11992.1	10801.7
Q02338	BDH1	D-beta-hydroxybutyrate dehydrogenase, mitochondrial OS=Homo sapiens OX=9606 GN=BDH1 PE=1 SV=3	865.53	0.776906	1.71345	0.0808819	9.60544	7.58357e-22	3.31463e-20	655.315	662.146	596.252	1109.49	1070.76	1099.22
O94763	URI1	Unconventional prefoldin RPB5 interactor 1 OS=Homo sapiens OX=9606 GN=URI1 PE=1 SV=3	1361.53	0.775786	1.71212	0.295903	2.62176	0.0087477	0.0314225	905.42	1076.97	1029.71	1259.56	2556.85	1340.66
Q3B726	TWISTNB	DNA-directed RNA polymerase I subunit RPA43 OS=Homo sapiens OX=9606 GN=TWISTNB PE=1 SV=1	1217.95	0.775571	1.71187	0.154199	5.02969	4.9128e-07	5.23449e-06	880.215	823.742	990.757	1275.56	1615.76	1721.67
Q08AD1	CAMSAP2	Calmodulin-regulated spectrin-associated protein 2 OS=Homo sapiens OX=9606 GN=CAMSAP2 PE=1 SV=3	1081.94	0.775314	1.71156	0.262398	2.95473	0.00312946	0.0133947	536.078	775.46	1082.64	1276.56	1440.51	1380.39
Q9BY44	EIF2A	Eukaryotic translation initiation factor 2A OS=Homo sapiens OX=9606 GN=EIF2A PE=1 SV=3	1850.16	0.773525	1.70944	0.250755	3.08478	0.00203703	0.00928291	1137.11	1114.42	1845.69	1865.82	2452.51	2685.4
Q9Y5M8	SRPRB	Signal recognition particle receptor subunit beta OS=Homo sapiens OX=9606 GN=SRPRB PE=1 SV=3	4564.34	0.771404	1.70693	0.168397	4.58087	4.63035e-06	4.16941e-05	3490.81	3345.22	3280.89	4355.93	6369.84	6543.36
O00220	TNFRSF10A	Tumor necrosis factor receptor superfamily member 10A OS=Homo sapiens OX=9606 GN=TNFRSF10A PE=1 SV=3	741	0.770928	1.70637	0.161079	4.78603	1.70115e-06	1.64298e-05	584.548	554.745	503.369	769.34	976.547	1057.45
P13726	F3	Tissue factor OS=Homo sapiens OX=9606 GN=F3 PE=1 SV=1	371.517	0.770497	1.70586	0.122171	6.30671	2.85023e-10	4.9904e-09	278.218	270.968	274.656	511.226	434.584	459.451
Q9UBT7	CTNNAL1	Alpha-catulin OS=Homo sapiens OX=9606 GN=CTNNAL1 PE=1 SV=2	404.136	0.769115	1.70422	0.31068	2.47558	0.0133018	0.0443741	178.37	345.853	372.533	457.202	511.573	559.288
P07099	EPHX1	Epoxide hydrolase 1 OS=Homo sapiens OX=9606 GN=EPHX1 PE=1 SV=1	2041.27	0.76798	1.70288	0.0779408	9.85337	6.62862e-23	3.10095e-21	1483.18	1459.28	1589.01	2538.12	2741.22	2436.82
Q9UL03	INTS6	Integrator complex subunit 6 OS=Homo sapiens OX=9606 GN=INTS6 PE=1 SV=1	463.828	0.766544	1.70119	0.107002	7.16382	7.84607e-13	1.77292e-11	316.994	341.912	371.534	583.258	583.497	585.775
Q9HD45	TM9SF3	Transmembrane 9 superfamily member 3 OS=Homo sapiens OX=9606 GN=TM9SF3 PE=1 SV=2	1596.71	0.766344	1.70095	0.311085	2.46346	0.0137603	0.0455231	1207.87	1172.55	1166.54	1131.5	2768.57	2133.24
Q5TH69	ARFGEF3	Brefeldin A-inhibited guanine nucleotide-exchange protein 3 OS=Homo sapiens OX=9606 GN=ARFGEF3 PE=1 SV=3	123.553	0.765573	1.70005	0.179404	4.26731	1.97848e-05	0.000157124	94.0318	91.6363	88.8885	166.073	151.952	148.736
Q12824	SMARCB1	SWI/SNF-related matrix-associated actin-dependent regulator of chromatin subfamily B member 1 OS=Homo sapiens OX=9606 GN=SMARCB1 PE=1 SV=2	1101.15	0.763986	1.69818	0.257469	2.96729	0.00300439	0.0129333	667.917	655.249	1125.59	1302.58	1616.77	1238.79
Q13753	LAMC2	Laminin subunit gamma-2 OS=Homo sapiens OX=9606 GN=LAMC2 PE=1 SV=2	763.636	0.762555	1.69649	0.0734247	10.3855	2.88552e-25	1.58518e-23	559.344	564.598	575.278	946.418	980.599	955.577
Q96QZ7	MAGI1	Membrane-associated guanylate kinase, WW and PDZ domain-containing protein 1 OS=Homo sapiens OX=9606 GN=MAGI1 PE=1 SV=3	161.681	0.761425	1.69516	0.206201	3.69264	0.000221934	0.00135745	135.716	113.314	110.861	210.093	226.916	173.186
Q7Z5G4	GOLGA7	Golgin subfamily A member 7 OS=Homo sapiens OX=9606 GN=GOLGA7 PE=1 SV=2	637.644	0.759515	1.69292	0.278053	2.73154	0.00630382	0.0240548	373.219	373.443	674.154	797.353	879.298	728.399
J3KPS0	DNAJB12	DnaJ (Hsp40) homolog, subfamily B, member 12, isoform CRA_c OS=Homo sapiens OX=9606 GN=DNAJB12 PE=1 SV=1	1209.74	0.75937	1.69275	0.290605	2.61306	0.00897351	0.0320988	919.961	896.657	878.898	1039.46	2229.65	1293.8
Q96S59	RANBP9	Ran-binding protein 9 OS=Homo sapiens OX=9606 GN=RANBP9 PE=1 SV=1	550.384	0.754694	1.68727	0.259793	2.90499	0.00367269	0.0152829	354.801	349.795	524.342	607.269	878.285	587.813
Q99942	RNF5	E3 ubiquitin-protein ligase RNF5 OS=Homo sapiens OX=9606 GN=RNF5 PE=1 SV=1	400.754	0.754178	1.68667	0.176834	4.2649	1.9999e-05	0.000158405	290.82	299.542	304.618	437.193	608.822	463.526
Q6UVK1	CSPG4	Chondroitin sulfate proteoglycan 4 OS=Homo sapiens OX=9606 GN=CSPG4 PE=1 SV=2	50.2091	0.751868	1.68397	0.273366	2.75041	0.00595216	0.0229945	34.8984	40.3988	36.9537	62.0274	64.833	62.1431
Q2TAA5	ALG11	GDP-Man:Man(3)GlcNAc(2)-PP-Dol alpha-1,2-mannosyltransferase OS=Homo sapiens OX=9606 GN=ALG11 PE=1 SV=2	484.638	0.748286	1.6798	0.147414	5.07608	3.85302e-07	4.18728e-06	349.954	364.575	370.535	513.227	640.226	669.312
Q10713	PMPCA	Mitochondrial-processing peptidase subunit alpha OS=Homo sapiens OX=9606 GN=PMPCA PE=1 SV=2	6487.02	0.738797	1.66878	0.0417282	17.705	3.83833e-70	8.83997e-68	4808.23	4727.65	5048.67	8072.57	8141.61	8123.43
Q2NL82	TSR1	Pre-rRNA-processing protein TSR1 homolog OS=Homo sapiens OX=9606 GN=TSR1 PE=1 SV=1	921.117	0.737435	1.66721	0.179052	4.11856	3.81253e-05	0.000284656	694.091	684.809	693.131	882.39	1268.3	1303.99
P51153	RAB13	Ras-related protein Rab-13 OS=Homo sapiens OX=9606 GN=RAB13 PE=1 SV=1	1957.52	0.73464	1.66398	0.0809217	9.0784	1.10178e-19	4.04752e-18	1478.34	1447.46	1483.14	2632.16	2258.01	2445.99
Q6NUQ1	RINT1	RAD50-interacting protein 1 OS=Homo sapiens OX=9606 GN=RINT1 PE=1 SV=1	899.388	0.733364	1.66251	0.238564	3.07408	0.00211152	0.00956413	715.417	660.176	651.183	1348.6	760.775	1260.18
P04920	SLC4A2	Anion exchange protein 2 OS=Homo sapiens OX=9606 GN=SLC4A2 PE=1 SV=4	692.182	0.730645	1.65938	0.217674	3.3566	0.000789078	0.00416299	526.384	470.991	564.292	675.299	1103.17	812.954
Q96ED9-2	HOOK2	Isoform 2 of Protein Hook homolog 2 OS=Homo sapiens OX=9606 GN=HOOK2	419.157	0.729929	1.65856	0.179423	4.06821	4.7375e-05	0.000346799	292.759	284.762	368.538	481.213	601.731	485.939
O15056	SYNJ2	Synaptojanin-2 OS=Homo sapiens OX=9606 GN=SYNJ2 PE=1 SV=3	581.621	0.729893	1.65852	0.17217	4.23938	2.2414e-05	0.000175216	401.332	400.047	511.359	639.283	825.608	712.099
O00194	RAB27B	Ras-related protein Rab-27B OS=Homo sapiens OX=9606 GN=RAB27B PE=1 SV=4	1265.53	0.729342	1.65788	0.182503	3.99633	6.43318e-05	0.000453732	960.676	989.278	906.863	1375.61	1996.65	1364.09
Q8IY81	FTSJ3	pre-rRNA processing protein FTSJ3 OS=Homo sapiens OX=9606 GN=FTSJ3 PE=1 SV=2	6514.2	0.72722	1.65545	0.123563	5.88543	3.97026e-09	5.8127e-08	4514.5	4672.47	5532.06	7472.3	9173.87	7720.01
P55085	F2RL1	Proteinase-activated receptor 2 OS=Homo sapiens OX=9606 GN=F2RL1 PE=1 SV=1	97.013	0.724394	1.65221	0.234115	3.09418	0.00197359	0.00903508	73.6744	73.9003	71.9098	140.062	101.302	121.23
P38432	COIL	Coilin OS=Homo sapiens OX=9606 GN=COIL PE=1 SV=1	1197.19	0.721945	1.6494	0.150811	4.78708	1.69224e-06	1.63701e-05	821.082	833.595	1056.67	1403.62	1675.53	1392.62
P30419	NMT1	Glycylpeptide N-tetradecanoyltransferase 1 OS=Homo sapiens OX=9606 GN=NMT1 PE=1 SV=2	1241.7	0.721512	1.64891	0.231757	3.11323	0.0018505	0.00854342	991.696	948.88	871.906	1053.47	1741.37	1842.9
O43324	EEF1E1	Eukaryotic translation elongation factor 1 epsilon-1 OS=Homo sapiens OX=9606 GN=EEF1E1 PE=1 SV=1	1542.32	0.721169	1.64852	0.252146	2.86012	0.00423482	0.0173249	1061.49	984.352	1448.18	1444.64	1823.43	2491.84
Q15046-2	KARS	Isoform Mitochondrial of Lysine--tRNA ligase OS=Homo sapiens OX=9606 GN=KARS	5755.94	0.719082	1.64613	0.219772	3.27195	0.00106808	0.00542927	3853.37	3771.87	5426.19	5775.55	9067.5	6641.16
Q13823	GNL2	Nucleolar GTP-binding protein 2 OS=Homo sapiens OX=9606 GN=GNL2 PE=1 SV=1	2609.13	0.717426	1.64425	0.12406	5.78291	7.34209e-09	1.04927e-07	1997.93	1890.86	2031.45	2726.21	3531.37	3476.96
O76003	GLRX3	Glutaredoxin-3 OS=Homo sapiens OX=9606 GN=GLRX3 PE=1 SV=2	2296.66	0.717054	1.64382	0.226492	3.16592	0.00154596	0.00738803	1521.96	1477.02	2213.22	2585.14	2423.13	3559.47
Q9UHR4	BAIAP2L1	Brain-specific angiogenesis inhibitor 1-associated protein 2-like protein 1 OS=Homo sapiens OX=9606 GN=BAIAP2L1 PE=1 SV=2	2249.29	0.717029	1.64379	0.108153	6.62976	3.36227e-11	6.53678e-10	1715.84	1684.93	1703.86	2686.19	2523.42	3181.52
Q5UIP0	RIF1	Telomere-associated protein RIF1 OS=Homo sapiens OX=9606 GN=RIF1 PE=1 SV=2	2278.44	0.71525	1.64177	0.202455	3.53288	0.000411066	0.00234649	1447.31	1520.38	2207.23	2408.06	3120.09	2967.59
P02538	KRT6A	Keratin, type II cytoskeletal 6A OS=Homo sapiens OX=9606 GN=KRT6A PE=1 SV=3	945.847	0.713284	1.63953	0.0712141	10.0161	1.29572e-23	6.35966e-22	719.295	687.765	743.068	1188.53	1181.18	1155.25
Q96JJ7	TMX3	Protein disulfide-isomerase TMX3 OS=Homo sapiens OX=9606 GN=TMX3 PE=1 SV=2	909.472	0.712626	1.63878	0.12366	5.76276	8.27498e-09	1.1659e-07	727.05	697.619	643.193	1219.54	987.69	1181.74
Q08379	GOLGA2	Golgin subfamily A member 2 OS=Homo sapiens OX=9606 GN=GOLGA2 PE=1 SV=3	1184.62	0.710836	1.63675	0.282858	2.51305	0.0119693	0.0405049	664.039	865.126	1166.54	1142.51	1918.65	1350.85
Q9UNQ2	DIMT1	Probable dimethyladenosine transferase OS=Homo sapiens OX=9606 GN=DIMT1 PE=1 SV=1	4289.85	0.702154	1.62693	0.0993535	7.06722	1.58063e-12	3.47971e-11	3137.95	3337.34	3322.83	4693.08	5411.53	5836.36
P53701	HCCS	Cytochrome c-type heme lyase OS=Homo sapiens OX=9606 GN=HCCS PE=1 SV=1	873.348	0.702041	1.6268	0.078294	8.96672	3.05477e-19	1.1086e-17	694.091	639.484	661.171	1065.47	1122.42	1057.45
P17096	HMGA1	High mobility group protein HMG-I/HMG-Y OS=Homo sapiens OX=9606 GN=HMGA1 PE=1 SV=3	4206.1	0.696916	1.62104	0.0689166	10.1125	4.86455e-24	2.44781e-22	3285.3	3222.05	3121.09	5516.44	4849.31	5242.43
Q13751	LAMB3	Laminin subunit beta-3 OS=Homo sapiens OX=9606 GN=LAMB3 PE=1 SV=1	2981.06	0.696791	1.6209	0.0805177	8.65389	4.97719e-18	1.68381e-16	2121.05	2384.52	2319.09	3641.61	3495.92	3924.18
Q99700	ATXN2	Ataxin-2 OS=Homo sapiens OX=9606 GN=ATXN2 PE=1 SV=2	2281.22	0.694488	1.61831	0.181807	3.81991	0.000133498	0.0008689	1752.68	1748.97	1725.84	2117.94	3379.42	2962.49
Q9H0S4	DDX47	Probable ATP-dependent RNA helicase DDX47 OS=Homo sapiens OX=9606 GN=DDX47 PE=1 SV=1	2207.36	0.685285	1.60802	0.24122	2.84091	0.00449849	0.0181761	1735.23	1677.04	1665.91	1766.78	3341.94	3057.24
P30520	ADSS	Adenylosuccinate synthetase isozyme 2 OS=Homo sapiens OX=9606 GN=ADSS PE=1 SV=3	1660.87	0.681854	1.6042	0.0665086	10.2521	1.15782e-24	6.1902e-23	1295.12	1273.06	1258.42	2144.95	1942.96	2050.72
Q92995	USP13	Ubiquitin carboxyl-terminal hydrolase 13 OS=Homo sapiens OX=9606 GN=USP13 PE=1 SV=2	889.135	0.679739	1.60185	0.261899	2.59543	0.00944739	0.0334146	432.353	794.182	823.967	1119.49	1082.91	1081.9
Q8IWT6	LRRC8A	Volume-regulated anion channel subunit LRRC8A OS=Homo sapiens OX=9606 GN=LRRC8A PE=1 SV=1	576.609	0.677351	1.5992	0.0861635	7.86123	3.80382e-15	1.04483e-13	433.322	447.343	450.435	697.308	735.449	695.799
Q9H788	SH2D4A	SH2 domain-containing protein 4A OS=Homo sapiens OX=9606 GN=SH2D4A PE=1 SV=1	296.416	0.671258	1.59246	0.275324	2.43807	0.0147658	0.0480271	229.748	234.51	221.722	263.116	335.308	494.089
P48426	PIP4K2A	Phosphatidylinositol 5-phosphate 4-kinase type-2 alpha OS=Homo sapiens OX=9606 GN=PIP4K2A PE=1 SV=2	2722	0.670696	1.59184	0.140836	4.76226	1.91436e-06	1.83118e-05	2136.56	2058.37	2106.36	3033.34	4029.78	2967.59
A0A3B3IRX3	MED13L	Mediator of RNA polymerase II transcription subunit 13 OS=Homo sapiens OX=9606 GN=MED13L PE=1 SV=1	206.878	0.66905	1.59003	0.142047	4.71005	2.47658e-06	2.31715e-05	162.859	165.537	150.811	249.11	267.436	245.516
P21589	NT5E	5'-nucleotidase OS=Homo sapiens OX=9606 GN=NT5E PE=1 SV=1	404.019	0.668429	1.58934	0.155877	4.28817	1.80151e-05	0.000145188	257.86	344.868	333.582	486.215	511.573	490.014
I3L4Q0	MCRIP1	HCG1818442, isoform CRA_a OS=Homo sapiens OX=9606 GN=MCRIP1 PE=1 SV=1	681.471	0.667649	1.58848	0.0810469	8.2378	1.75404e-16	5.27799e-15	537.048	525.185	517.351	843.373	861.063	804.804
O75911	DHRS3	Short-chain dehydrogenase/reductase 3 OS=Homo sapiens OX=9606 GN=DHRS3 PE=1 SV=2	554.167	0.66352	1.58394	0.100111	6.62784	3.40626e-11	6.60087e-10	412.965	438.475	435.454	692.306	713.163	632.637
P50452	SERPINB8	Serpin B8 OS=Homo sapiens OX=9606 GN=SERPINB8 PE=1 SV=2	615.085	0.66258	1.58291	0.129307	5.12409	2.98982e-07	3.28497e-06	490.517	481.83	456.428	793.351	653.395	814.991
Q6ZT12-4	UBR3	Isoform 4 of E3 ubiquitin-protein ligase UBR3 OS=Homo sapiens OX=9606 GN=UBR3	434.861	0.661447	1.58167	0.210218	3.14648	0.00165246	0.00777293	352.862	324.176	333.582	450.199	680.747	467.601
P37198	NUP62	Nuclear pore glycoprotein p62 OS=Homo sapiens OX=9606 GN=NUP62 PE=1 SV=3	623.927	0.661386	1.5816	0.134828	4.90541	9.32329e-07	9.46235e-06	509.905	490.698	449.436	834.369	664.538	794.617
Q9P2W1	PSMC3IP	Homologous-pairing protein 2 homolog OS=Homo sapiens OX=9606 GN=PSMC3IP PE=1 SV=1	142.298	0.661047	1.58123	0.268678	2.46037	0.0138793	0.0458154	105.665	116.27	108.863	218.096	128.653	176.242
Q7Z739	YTHDF3	YTH domain-containing family protein 3 OS=Homo sapiens OX=9606 GN=YTHDF3 PE=1 SV=1	2972.45	0.660189	1.58029	0.270033	2.44484	0.0144915	0.0473734	1757.52	1764.74	3389.75	3619.6	3653.95	3649.12
Q16643-3	DBN1	Isoform 3 of Drebrin OS=Homo sapiens OX=9606 GN=DBN1	3514	0.658976	1.57896	0.106843	6.16772	6.92807e-10	1.15881e-08	2772.48	2748.1	2654.67	3782.67	4835.12	4290.93
J3KQV8	SYNJ1	Synaptojanin-1 OS=Homo sapiens OX=9606 GN=SYNJ1 PE=1 SV=1	1224.21	0.658404	1.57834	0.163365	4.03027	5.57135e-05	0.000397631	855.98	845.419	1147.56	1404.62	1659.32	1432.35
Q9UKJ5	CHIC2	Cysteine-rich hydrophobic domain-containing protein 2 OS=Homo sapiens OX=9606 GN=CHIC2 PE=1 SV=1	157.903	0.654915	1.57452	0.265156	2.46992	0.0135142	0.0448577	127.961	124.152	115.855	156.069	253.254	170.129
P02768	ALB	Serum albumin OS=Homo sapiens OX=9606 GN=ALB PE=1 SV=2	9686.39	0.654365	1.57392	0.0449267	14.5651	4.67975e-48	5.96221e-46	7770.71	7465.9	7342.79	11954.3	12114.7	11470
Q7LBC6	KDM3B	Lysine-specific demethylase 3B OS=Homo sapiens OX=9606 GN=KDM3B PE=1 SV=2	1201.91	0.648888	1.56796	0.21409	3.03091	0.00243816	0.0108306	845.317	921.29	1041.69	1552.69	1072.78	1777.7
Q8WV24	PHLDA1	Pleckstrin homology-like domain family A member 1 OS=Homo sapiens OX=9606 GN=PHLDA1 PE=1 SV=4	395.656	0.647549	1.5665	0.105352	6.14652	7.92038e-10	1.30654e-08	319.902	310.381	294.63	497.22	488.274	463.526
Q9Y3A2	UTP11	Probable U3 small nucleolar RNA-associated protein 11 OS=Homo sapiens OX=9606 GN=UTP11 PE=1 SV=2	1765.65	0.644828	1.56355	0.0603159	10.6909	1.12326e-26	6.40577e-25	1405.63	1378.49	1348.31	2223.98	2066.55	2170.93
Q9BRK5	SDF4	45 kDa calcium-binding protein OS=Homo sapiens OX=9606 GN=SDF4 PE=1 SV=1	2330.78	0.644791	1.56351	0.0609103	10.5859	3.46409e-26	1.95688e-24	1821.5	1821.89	1811.73	2682.19	2923.56	2923.78
Q5M775	SPECC1	Cytospin-B OS=Homo sapiens OX=9606 GN=SPECC1 PE=1 SV=1	284.739	0.644767	1.56349	0.114014	5.65515	1.5571e-08	2.11907e-07	220.054	221.701	224.718	350.155	346.451	345.353
F5H0R1	TUT1	Speckle targeted PIP5K1A-regulated poly(A) polymerase OS=Homo sapiens OX=9606 GN=TUT1 PE=1 SV=1	274.376	0.643045	1.56162	0.127432	5.04617	4.5076e-07	4.83719e-06	224.901	201.994	215.729	327.145	352.529	323.959
P21281	ATP6V1B2	V-type proton ATPase subunit B, brain isoform OS=Homo sapiens OX=9606 GN=ATP6V1B2 PE=1 SV=3	2010.34	0.642042	1.56054	0.121889	5.26742	1.38354e-07	1.60867e-06	1588.85	1560.77	1561.04	2089.92	2762.49	2498.97
O95487-3	SEC24B	Isoform 3 of Protein transport protein Sec24B OS=Homo sapiens OX=9606 GN=SEC24B	984.398	0.640762	1.55915	0.233881	2.7397	0.00614962	0.0235749	639.804	636.528	1031.71	1071.47	1191.31	1335.57
P78362-2	SRPK2	Isoform 2 of SRSF protein kinase 2 OS=Homo sapiens OX=9606 GN=SRPK2	575.996	0.637647	1.55579	0.104303	6.11339	9.75348e-10	1.57423e-08	454.649	464.094	433.456	743.329	645.291	715.155
Q9NVM4	PRMT7	Protein arginine N-methyltransferase 7 OS=Homo sapiens OX=9606 GN=PRMT7 PE=1 SV=1	551.124	0.637494	1.55562	0.10028	6.35716	2.05522e-10	3.63028e-09	455.618	420.739	417.476	681.301	699.994	631.618
Q9H6Y2	WDR55	WD repeat-containing protein 55 OS=Homo sapiens OX=9606 GN=WDR55 PE=1 SV=2	844.025	0.636573	1.55463	0.231245	2.7528	0.00590878	0.0228564	554.497	532.082	895.876	1021.45	1019.09	1041.15
Q9UJK0	TSR3	Ribosome biogenesis protein TSR3 homolog OS=Homo sapiens OX=9606 GN=TSR3 PE=1 SV=1	405.547	0.635987	1.554	0.0987634	6.4395	1.19867e-10	2.2085e-09	319.902	323.191	309.612	493.218	505.495	481.864
Q6KCM7-3	SLC25A25	Isoform 3 of Calcium-binding mitochondrial carrier protein SCaMC-2 OS=Homo sapiens OX=9606 GN=SLC25A25	1363.61	0.633945	1.5518	0.161865	3.91651	8.98414e-05	0.000610636	878.277	1174.52	1153.55	1544.68	1885.22	1545.43
Q12986	NFX1	Transcriptional repressor NF-X1 OS=Homo sapiens OX=9606 GN=NFX1 PE=1 SV=2	60.6671	0.632537	1.55029	0.260698	2.42632	0.0152527	0.0492361	45.5618	51.2375	45.9424	76.0336	80.0282	65.1993
Q13045	FLII	Protein flightless-1 homolog OS=Homo sapiens OX=9606 GN=FLII PE=1 SV=2	1941.82	0.631344	1.54901	0.0733642	8.60562	7.5905e-18	2.52511e-16	1553.95	1510.52	1506.11	2227.99	2325.88	2526.47
P30050	RPL12	60S ribosomal protein L12 OS=Homo sapiens OX=9606 GN=RPL12 PE=1 SV=1	4366.39	0.628736	1.54621	0.0567621	11.0767	1.62788e-28	1.03699e-26	3591.63	3401.38	3295.87	5349.37	5436.86	5123.24
Q9NUQ3	TXLNG	Gamma-taxilin OS=Homo sapiens OX=9606 GN=TXLNG PE=1 SV=2	2133.17	0.628587	1.54605	0.0532525	11.8039	3.72698e-32	2.89833e-30	1676.09	1672.12	1678.89	2682.19	2508.23	2581.49
P08174-7	CD55	Isoform 7 of Complement decay-accelerating factor OS=Homo sapiens OX=9606 GN=CD55	6760.65	0.627193	1.54456	0.0477942	13.1228	2.43779e-39	2.47415e-37	5457.72	5304.07	5179.5	8521.77	7992.69	8108.15
P07996	THBS1	Thrombospondin-1 OS=Homo sapiens OX=9606 GN=THBS1 PE=1 SV=2	1317.56	0.623029	1.54011	0.0632272	9.85382	6.59865e-23	3.10095e-21	1019.81	1015.88	1076.65	1582.7	1571.19	1639.15
Q9UL42	PNMA2	Paraneoplastic antigen Ma2 OS=Homo sapiens OX=9606 GN=PNMA2 PE=1 SV=2	548.767	0.621045	1.53799	0.129692	4.78862	1.67931e-06	1.62713e-05	434.291	437.49	425.466	576.255	722.28	696.818
J3KNR0	MARK3	Non-specific serine/threonine protein kinase OS=Homo sapiens OX=9606 GN=MARK3 PE=1 SV=2	1911.96	0.620009	1.53688	0.140844	4.40209	1.07211e-05	8.89171e-05	1416.29	1420.86	1684.89	1959.87	2508.23	2481.65
Q8TCC7-2	SLC22A8	Isoform 2 of Solute carrier family 22 member 8 OS=Homo sapiens OX=9606 GN=SLC22A8	804.353	0.619402	1.53624	0.110899	5.58527	2.33331e-08	3.09798e-07	633.018	624.704	645.191	1046.46	862.076	1014.66
Q9Y2X9	ZNF281	Zinc finger protein 281 OS=Homo sapiens OX=9606 GN=ZNF281 PE=1 SV=1	484.821	0.618361	1.53513	0.224549	2.75379	0.00589099	0.0228024	314.086	328.117	505.366	602.266	582.484	576.606
Q70Z53	FRA10AC1	Protein FRA10AC1 OS=Homo sapiens OX=9606 GN=FRA10AC1 PE=1 SV=3	229.913	0.616591	1.53325	0.246215	2.50428	0.01227	0.0413002	177.4	177.361	189.762	225.1	246.163	363.69
Q16795	NDUFA9	NADH dehydrogenase [ubiquinone] 1 alpha subcomplex subunit 9, mitochondrial OS=Homo sapiens OX=9606 GN=NDUFA9 PE=1 SV=2	803.053	0.615345	1.53192	0.0855336	7.19419	6.2833e-13	1.42517e-11	658.223	641.454	603.243	982.434	1008.96	923.996
Q9H501	ESF1	ESF1 homolog OS=Homo sapiens OX=9606 GN=ESF1 PE=1 SV=1	3032.86	0.612889	1.52932	0.140911	4.34948	1.36458e-05	0.000111933	2252.89	2206.17	2735.57	3981.76	3135.28	3885.47
Q9NQC8-2	IFT46	Isoform 2 of Intraflagellar transport protein 46 homolog OS=Homo sapiens OX=9606 GN=IFT46	94.9596	0.611764	1.52813	0.238207	2.5682	0.0102228	0.0357351	72.705	82.7683	69.9123	134.059	100.289	110.024
Q9UJG1-3	MOSPD1	Isoform 3 of Motile sperm domain-containing protein 1 OS=Homo sapiens OX=9606 GN=MOSPD1	83.3345	0.610476	1.52676	0.224903	2.7144	0.0066396	0.0251951	65.9192	62.0762	69.9123	109.048	90.1584	102.893
Q9UHB9	SRP68	Signal recognition particle subunit SRP68 OS=Homo sapiens OX=9606 GN=SRP68 PE=1 SV=2	5303.28	0.61036	1.52664	0.165209	3.69448	0.000220339	0.00135045	3900.87	3978.79	4714.09	5568.46	7885.31	5772.18
Q9NU22	MDN1	Midasin OS=Homo sapiens OX=9606 GN=MDN1 PE=1 SV=2	1012.7	0.606047	1.52208	0.0699016	8.67001	4.32094e-18	1.4701e-16	816.235	812.903	780.022	1261.56	1221.7	1183.77
O15121	DEGS1	Sphingolipid delta(4)-desaturase DES1 OS=Homo sapiens OX=9606 GN=DEGS1 PE=1 SV=1	540.525	0.6047	1.52066	0.155166	3.89713	9.73402e-05	0.00065565	463.373	424.68	398.5	623.276	757.736	575.588
Q6ZNB6	NFXL1	NF-X1-type zinc finger protein NFXL1 OS=Homo sapiens OX=9606 GN=NFXL1 PE=1 SV=2	111.099	0.604031	1.51996	0.212357	2.84442	0.00444926	0.0180803	97.9094	89.6657	76.9035	145.064	121.562	135.492
Q9BZR9	TRIM8	E3 ubiquitin-protein ligase TRIM8 OS=Homo sapiens OX=9606 GN=TRIM8 PE=1 SV=2	234.793	0.603841	1.51976	0.136372	4.42791	9.51526e-06	7.99122e-05	188.064	181.302	189.762	304.134	277.566	267.928
Q96GQ5	C16orf58	RUS1 family protein C16orf58 OS=Homo sapiens OX=9606 GN=C16orf58 PE=1 SV=2	269.204	0.601728	1.51753	0.246568	2.44041	0.0146705	0.047795	221.993	212.833	206.741	271.12	429.519	273.022
Q86UK7	ZNF598	E3 ubiquitin-protein ligase ZNF598 OS=Homo sapiens OX=9606 GN=ZNF598 PE=1 SV=1	1323.51	0.601	1.51677	0.116738	5.14827	2.62904e-07	2.89388e-06	995.574	987.308	1172.53	1541.68	1746.44	1497.55
O75822	EIF3J	Eukaryotic translation initiation factor 3 subunit J OS=Homo sapiens OX=9606 GN=EIF3J PE=1 SV=2	992.575	0.600798	1.51656	0.232271	2.58663	0.00969201	0.0341588	846.286	801.079	719.098	1008.45	1609.68	970.858
P08567	PLEK	Pleckstrin OS=Homo sapiens OX=9606 GN=PLEK PE=1 SV=3	650.817	0.597834	1.51344	0.0997222	5.99499	2.03492e-09	3.1405e-08	551.589	499.566	502.37	798.353	819.53	733.492
P00740	F9	Coagulation factor IX OS=Homo sapiens OX=9606 GN=F9 PE=1 SV=2	399.298	0.596209	1.51174	0.102049	5.84239	5.14579e-09	7.46078e-08	315.055	320.235	318.6	497.22	486.248	458.433
A0A087WVP1	FAT1	Protocadherin Fat 1 OS=Homo sapiens OX=9606 GN=FAT1 PE=1 SV=1	2335.78	0.596096	1.51162	0.0946413	6.29848	3.00578e-10	5.21699e-09	1820.53	1904.66	1854.67	2496.1	2976.24	2962.49
Q9H7B2	RPF2	Ribosome production factor 2 homolog OS=Homo sapiens OX=9606 GN=RPF2 PE=1 SV=2	1401.11	0.595602	1.5111	0.105233	5.65985	1.51504e-08	2.07598e-07	1173.94	1140.03	1033.7	1660.73	1847.74	1550.52
P22102	GART	Trifunctional purine biosynthetic protein adenosine-3 OS=Homo sapiens OX=9606 GN=GART PE=1 SV=1	7436.47	0.594226	1.50966	0.0555721	10.6929	1.09907e-26	6.32813e-25	5978.29	5933.7	5866.64	8477.75	9432.19	8930.27
D6RFG8	DCK	Deoxycytidine kinase OS=Homo sapiens OX=9606 GN=DCK PE=1 SV=1	1445.51	0.593398	1.5088	0.099075	5.98938	2.10642e-09	3.23417e-08	1179.76	1164.67	1112.6	1854.82	1550.93	1810.3
O14944	EREG	Proepiregulin OS=Homo sapiens OX=9606 GN=EREG PE=1 SV=1	669.599	0.593344	1.50874	0.0887186	6.68794	2.26335e-11	4.45408e-10	537.048	532.082	532.332	814.36	845.868	755.904
Q9NZD8	SPG21	Maspardin OS=Homo sapiens OX=9606 GN=SPG21 PE=1 SV=1	1250.92	0.590447	1.50571	0.169606	3.48129	0.000498997	0.00278731	887.971	869.067	1238.45	1427.63	1497.24	1585.16
P08581	MET	Hepatocyte growth factor receptor OS=Homo sapiens OX=9606 GN=MET PE=1 SV=4	4032.2	0.59007	1.50532	0.0721727	8.17581	2.93875e-16	8.6686e-15	3136.98	3069.32	3450.67	4857.15	5042.79	4636.28
E9PEW8	HBD	Hemoglobin subunit delta (Fragment) OS=Homo sapiens OX=9606 GN=HBD PE=1 SV=1	491.933	0.588372	1.50355	0.0930976	6.31995	2.61656e-10	4.5947e-09	404.24	395.12	379.524	585.259	610.849	576.606
Q6PCB5	RSBN1L	Round spermatid basic protein 1-like protein OS=Homo sapiens OX=9606 GN=RSBN1L PE=1 SV=2	1461.8	0.587928	1.50309	0.0757368	7.76278	8.30882e-15	2.23109e-13	1151.65	1150.87	1201.49	1656.73	1865.98	1744.08
Q9Y320	TMX2	Thioredoxin-related transmembrane protein 2 OS=Homo sapiens OX=9606 GN=TMX2 PE=1 SV=1	1212.56	0.585391	1.50045	0.164255	3.56392	0.000365357	0.00211602	999.452	994.205	915.851	1147.51	1601.58	1616.74
Q9NX58	LYAR	Cell growth-regulating nucleolar protein OS=Homo sapiens OX=9606 GN=LYAR PE=1 SV=2	3937.59	0.585182	1.50023	0.16325	3.58457	0.00033764	0.0019802	2575.7	3046.66	3827.2	5061.24	4309.37	4805.39
K7ELL7	PRKCSH	Glucosidase 2 subunit beta OS=Homo sapiens OX=9606 GN=PRKCSH PE=1 SV=1	10980.4	0.584698	1.49973	0.114368	5.11242	3.18054e-07	3.47537e-06	8268.98	9204.03	8882.86	11924.3	15237.8	12364.4
P35354	PTGS2	Prostaglandin G/H synthase 2 OS=Homo sapiens OX=9606 GN=PTGS2 PE=1 SV=2	1387.41	0.583608	1.49859	0.0788156	7.40472	1.31428e-13	3.19914e-12	1055.68	1101.61	1174.53	1589.7	1740.36	1662.58
Q9H3N1	TMX1	Thioredoxin-related transmembrane protein 1 OS=Homo sapiens OX=9606 GN=TMX1 PE=1 SV=1	3298.01	0.58061	1.49548	0.180905	3.20947	0.00132982	0.00650035	2003.75	2983.6	2942.31	3532.56	4023.7	4302.14
Q86VP1-2	TAX1BP1	Isoform 2 of Tax1-binding protein 1 OS=Homo sapiens OX=9606 GN=TAX1BP1	7322.76	0.580546	1.49542	0.094389	6.15057	7.72063e-10	1.2771e-08	5575.99	5487.34	6543.79	8588.8	9322.78	8417.84
Q8NC42	RNF149	E3 ubiquitin-protein ligase RNF149 OS=Homo sapiens OX=9606 GN=RNF149 PE=2 SV=2	1215.05	0.580293	1.49515	0.105262	5.51286	3.53053e-08	4.55621e-07	1033.38	979.425	908.86	1443.64	1588.41	1336.59
Q8NBP7	PCSK9	Proprotein convertase subtilisin/kexin type 9 OS=Homo sapiens OX=9606 GN=PCSK9 PE=1 SV=3	340.968	-0.581535	0.668252	0.108361	-5.36664	8.02165e-08	9.74313e-07	416.842	402.018	407.489	284.126	272.501	262.835
P00352	ALDH1A1	Retinal dehydrogenase 1 OS=Homo sapiens OX=9606 GN=ALDH1A1 PE=1 SV=2	738.103	-0.59144	0.66368	0.182861	-3.23437	0.0012191	0.00604803	942.257	901.583	817.974	458.203	626.044	682.555
O43175	PHGDH	D-3-phosphoglycerate dehydrogenase OS=Homo sapiens OX=9606 GN=PHGDH PE=1 SV=4	5418.57	-0.592858	0.663028	0.0509331	-11.6399	2.58196e-31	1.81891e-29	6703.4	6521.95	6324.07	4322.91	4474.49	4164.61
Q6NTF9-2	RHBDD2	Isoform 2 of Rhomboid domain-containing protein 2 OS=Homo sapiens OX=9606 GN=RHBDD2	186.297	-0.593115	0.66291	0.146814	-4.0399	5.34746e-05	0.000384863	223.931	232.54	215.729	157.069	143.848	144.661
Q15170-2	TCEAL1	Isoform 2 of Transcription elongation factor A protein-like 1 OS=Homo sapiens OX=9606 GN=TCEAL1	228.513	-0.593704	0.66264	0.23348	-2.54284	0.0109955	0.0377095	280.157	279.836	264.668	217.096	132.705	196.617
Q9Y2S6	TMA7	Translation machinery-associated protein 7 OS=Homo sapiens OX=9606 GN=TMA7 PE=1 SV=1	459.797	-0.594311	0.662361	0.116323	-5.10917	3.23584e-07	3.52937e-06	589.395	551.789	518.35	383.169	377.855	338.221
P53396	ACLY	ATP-citrate synthase OS=Homo sapiens OX=9606 GN=ACLY PE=1 SV=3	26238.2	-0.594586	0.662234	0.0481106	-12.3587	4.36958e-35	3.8478e-33	32220.9	31495.3	30993.1	21698.6	19904.7	21116.4
A6PVN5	PTPA	Serine/threonine-protein phosphatase 2A activator OS=Homo sapiens OX=9606 GN=PTPA PE=1 SV=1	1080.52	-0.596361	0.66142	0.0646615	-9.22281	2.89416e-20	1.11808e-18	1324.2	1310.5	1267.41	879.389	848.907	852.685
Q9BY77	POLDIP3	Polymerase delta-interacting protein 3 OS=Homo sapiens OX=9606 GN=POLDIP3 PE=1 SV=2	1762.19	-0.599807	0.659842	0.121458	-4.93837	7.87785e-07	8.09545e-06	2261.61	2172.67	1935.57	1292.57	1589.42	1321.3
A6NFQ2	TCAF2	TRPM8 channel-associated factor 2 OS=Homo sapiens OX=9606 GN=TCAF2 PE=1 SV=2	247.5	-0.600229	0.659649	0.123125	-4.87495	1.08838e-06	1.09204e-05	295.667	304.469	294.63	198.088	192.473	199.673
Q9HBM1	SPC25	Kinetochore protein Spc25 OS=Homo sapiens OX=9606 GN=SPC25 PE=1 SV=1	260.467	-0.601447	0.659093	0.233962	-2.57071	0.0101491	0.0354982	317.963	311.366	312.608	206.091	153.978	260.797
Q9UBN7	HDAC6	Histone deacetylase 6 OS=Homo sapiens OX=9606 GN=HDAC6 PE=1 SV=2	131.928	-0.603044	0.658363	0.169033	-3.56761	0.000360246	0.00209229	162.859	156.669	157.802	109.048	105.354	99.8364
Q8IYU2	HACE1	E3 ubiquitin-protein ligase HACE1 OS=Homo sapiens OX=9606 GN=HACE1 PE=1 SV=2	120.633	-0.606524	0.656777	0.190857	-3.1779	0.00148346	0.00711204	148.318	152.727	135.83	100.044	101.302	85.5741
P84243	H3F3A	Histone H3.3 OS=Homo sapiens OX=9606 GN=H3F3A PE=1 SV=2	914.693	-0.607455	0.656354	0.124718	-4.87062	1.11247e-06	1.11396e-05	1151.65	1138.06	1023.72	817.361	649.343	708.024
P43003	SLC1A3	Excitatory amino acid transporter 1 OS=Homo sapiens OX=9606 GN=SLC1A3 PE=1 SV=1	140.461	-0.611254	0.654628	0.206459	-2.96066	0.00306979	0.013177	191.941	164.551	152.808	119.053	96.2365	118.174
P61812-2	TGFB2	Isoform B of Transforming growth factor beta-2 proprotein OS=Homo sapiens OX=9606 GN=TGFB2	477.768	-0.613385	0.653661	0.0962239	-6.37456	1.83485e-10	3.29942e-09	581.64	568.539	583.268	372.165	361.647	399.346
O00469-2	PLOD2	Isoform 2 of Procollagen-lysine,2-oxoglutarate 5-dioxygenase 2 OS=Homo sapiens OX=9606 GN=PLOD2	1039.82	-0.614293	0.65325	0.148311	-4.14192	3.44406e-05	0.000260063	1308.69	1236.6	1228.46	917.406	667.577	880.191
P42772	CDKN2B	Cyclin-dependent kinase 4 inhibitor B OS=Homo sapiens OX=9606 GN=CDKN2B PE=1 SV=1	164.847	-0.61964	0.650833	0.164964	-3.75621	0.000172508	0.00109194	209.39	201.994	187.765	140.062	130.679	119.192
H7BYY1	TPM1	Tropomyosin 1 (Alpha), isoform CRA_m OS=Homo sapiens OX=9606 GN=TPM1 PE=1 SV=1	2269.46	-0.621651	0.649927	0.0741167	-8.38746	4.96771e-17	1.58227e-15	2715.29	2657.45	2880.39	1878.83	1673.5	1811.32
P50238	CRIP1	Cysteine-rich protein 1 OS=Homo sapiens OX=9606 GN=CRIP1 PE=1 SV=3	1735.29	-0.622711	0.64945	0.106471	-5.84864	4.95594e-09	7.20296e-08	2068.7	1986.44	2257.17	1403.62	1220.68	1475.13
Q96B21	TMEM45B	Transmembrane protein 45B OS=Homo sapiens OX=9606 GN=TMEM45B PE=1 SV=1	84.8443	-0.626551	0.647723	0.21135	-2.96452	0.00303152	0.0130408	109.542	100.504	98.876	65.0288	66.859	68.2555
O95236	APOL3	Apolipoprotein L3 OS=Homo sapiens OX=9606 GN=APOL3 PE=1 SV=3	127.29	-0.626993	0.647525	0.175473	-3.57316	0.000352699	0.00205644	155.104	158.639	149.812	97.0429	107.38	95.7615
O43299	AP5Z1	AP-5 complex subunit zeta-1 OS=Homo sapiens OX=9606 GN=AP5Z1 PE=1 SV=2	94.4624	-0.631299	0.645595	0.219929	-2.87047	0.00409861	0.0168099	112.45	129.079	102.871	74.0327	69.8981	78.4429
Q9HB58-6	SP110	Isoform 6 of Sp110 nuclear body protein OS=Homo sapiens OX=9606 GN=SP110	167.582	-0.633164	0.644761	0.154297	-4.10354	4.06869e-05	0.000301899	202.605	201.994	206.741	135.06	121.562	137.53
E9PLM6	MDK	Midkine OS=Homo sapiens OX=9606 GN=MDK PE=1 SV=1	1062.38	-0.639365	0.641996	0.105174	-6.07909	1.2087e-09	1.93521e-08	1235.99	1209.99	1436.2	830.367	866.129	795.635
P52564	MAP2K6	Dual specificity mitogen-activated protein kinase kinase 6 OS=Homo sapiens OX=9606 GN=MAP2K6 PE=1 SV=1	289.97	-0.639612	0.641886	0.194076	-3.29567	0.000981867	0.00504239	370.311	353.736	335.579	210.093	278.579	191.523
Q9BR76	CORO1B	Coronin-1B OS=Homo sapiens OX=9606 GN=CORO1B PE=1 SV=1	3898.1	-0.643206	0.640289	0.0655091	-9.81856	9.36691e-23	4.34799e-21	4815.01	4790.71	4653.16	3203.42	2831.38	3094.93
Q9BYK8	HELZ2	Helicase with zinc finger domain 2 OS=Homo sapiens OX=9606 GN=HELZ2 PE=1 SV=6	1513.65	-0.643859	0.639999	0.0550483	-11.6963	1.33202e-31	9.727e-30	1849.62	1848.49	1839.69	1194.53	1202.45	1147.1
P32004	L1CAM	Neural cell adhesion molecule L1 OS=Homo sapiens OX=9606 GN=L1CAM PE=1 SV=2	140.391	-0.645681	0.639191	0.162837	-3.96521	7.33328e-05	0.000512987	169.645	170.463	173.782	109.048	113.458	105.949
Q96AZ6	ISG20	Interferon-stimulated gene 20 kDa protein OS=Homo sapiens OX=9606 GN=ISG20 PE=1 SV=2	152.663	-0.648618	0.637891	0.178845	-3.62671	0.000287058	0.00170865	185.155	177.361	196.753	118.052	132.705	105.949
Q9GZP4	PITHD1	PITH domain-containing protein 1 OS=Homo sapiens OX=9606 GN=PITHD1 PE=1 SV=1	1734.5	-0.64865	0.637877	0.227992	-2.84506	0.00444034	0.018063	2174.36	2137.2	2042.44	1641.73	910.701	1500.6
P78356	PIP4K2B	Phosphatidylinositol 5-phosphate 4-kinase type-2 beta OS=Homo sapiens OX=9606 GN=PIP4K2B PE=1 SV=1	222.964	-0.650608	0.637012	0.131948	-4.93078	8.19019e-07	8.3834e-06	264.646	273.924	278.651	171.076	169.174	180.317
Q92686	NRGN	Neurogranin OS=Homo sapiens OX=9606 GN=NRGN PE=1 SV=1	397.227	-0.651299	0.636707	0.248	-2.62621	0.00863416	0.0311642	472.098	486.756	497.376	376.166	210.707	340.259
Q13287	NMI	N-myc-interactor OS=Homo sapiens OX=9606 GN=NMI PE=1 SV=2	2554.31	-0.652676	0.636099	0.13358	-4.88602	1.02897e-06	1.03728e-05	2956.67	3247.67	3163.03	2174.96	1638.05	2145.46
P45973	CBX5	Chromobox protein homolog 5 OS=Homo sapiens OX=9606 GN=CBX5 PE=1 SV=1	1027.24	-0.654635	0.635236	0.0653149	-10.0227	1.2109e-23	5.99244e-22	1261.19	1238.57	1269.41	790.349	821.556	782.392
A0A087WZE9	HMGN3	High mobility group nucleosome-binding domain-containing protein 3 OS=Homo sapiens OX=9606 GN=HMGN3 PE=1 SV=1	433.111	-0.668528	0.629148	0.111775	-5.98102	2.21748e-09	3.38731e-08	509.905	540.95	544.317	349.154	305.931	348.409
Q9ULR3	PPM1H	Protein phosphatase 1H OS=Homo sapiens OX=9606 GN=PPM1H PE=1 SV=2	385.67	-0.669102	0.628898	0.12849	-5.20741	1.91496e-07	2.16354e-06	499.241	480.844	440.448	286.127	327.204	280.153
P15559	NQO1	NAD(P)H dehydrogenase [quinone] 1 OS=Homo sapiens OX=9606 GN=NQO1 PE=1 SV=1	744.088	-0.671731	0.627753	0.080609	-8.33321	7.86823e-17	2.45391e-15	930.624	921.29	890.883	602.266	564.25	555.213
P48431	SOX2	Transcription factor SOX-2 OS=Homo sapiens OX=9606 GN=SOX2 PE=1 SV=1	579.666	-0.676172	0.625824	0.0956544	-7.06891	1.56158e-12	3.45046e-11	738.683	711.413	689.136	474.21	423.441	441.114
Q9NR19-2	ACSS2	Isoform 2 of Acetyl-coenzyme A synthetase, cytoplasmic OS=Homo sapiens OX=9606 GN=ACSS2	2941.76	-0.6973	0.616725	0.0576538	-12.0946	1.12782e-33	9.00454e-32	3719.59	3598.45	3599.49	2277.01	2329.94	2126.11
Q92504	SLC39A7	Zinc transporter SLC39A7 OS=Homo sapiens OX=9606 GN=SLC39A7 PE=1 SV=2	430.168	-0.701308	0.615014	0.192099	-3.65077	0.000261455	0.00157346	517.66	522.229	558.3	382.169	252.241	348.409
Q6UB99	ANKRD11	Ankyrin repeat domain-containing protein 11 OS=Homo sapiens OX=9606 GN=ANKRD11 PE=1 SV=3	169.464	-0.701506	0.61493	0.264942	-2.64778	0.00810228	0.0295974	223.931	207.906	197.752	110.049	172.213	104.93
P31323	PRKAR2B	cAMP-dependent protein kinase type II-beta regulatory subunit OS=Homo sapiens OX=9606 GN=PRKAR2B PE=1 SV=3	703.586	-0.707336	0.61245	0.0937789	-7.54259	4.60724e-14	1.16899e-12	876.338	879.906	861.919	578.256	497.391	527.707
A0A0C4DH75	MPP2	MAGUK p55 subfamily member 2 OS=Homo sapiens OX=9606 GN=MPP2 PE=1 SV=1	685.453	-0.708357	0.612017	0.0769943	-9.20012	3.57549e-20	1.37244e-18	863.736	831.624	855.927	522.231	525.755	513.445
P51397	DAP	Death-associated protein 1 OS=Homo sapiens OX=9606 GN=DAP PE=1 SV=3	1988.07	-0.710222	0.611226	0.0555477	-12.7858	1.96818e-37	1.84147e-35	2420.59	2478.12	2504.86	1568.69	1485.08	1471.06
E5RFJ3	CCAR2	Cell cycle and apoptosis regulator protein 2 (Fragment) OS=Homo sapiens OX=9606 GN=CCAR2 PE=1 SV=1	493.951	-0.710405	0.611149	0.292105	-2.43202	0.0150151	0.0486527	644.651	634.557	560.297	457.202	228.942	438.058
Q9Y617	PSAT1	Phosphoserine aminotransferase OS=Homo sapiens OX=9606 GN=PSAT1 PE=1 SV=2	4811.41	-0.713499	0.609839	0.0511563	-13.9474	3.26057e-44	3.98455e-42	5737.88	6153.43	6041.42	3722.65	3537.45	3675.61
P10253	GAA	Lysosomal alpha-glucosidase OS=Homo sapiens OX=9606 GN=GAA PE=1 SV=4	250.172	-0.715955	0.608802	0.126652	-5.65292	1.57744e-08	2.14189e-07	317.963	309.396	305.617	183.081	199.564	185.411
Q9BXC9	BBS2	Bardet-Biedl syndrome 2 protein OS=Homo sapiens OX=9606 GN=BBS2 PE=1 SV=1	97.4874	-0.719394	0.607352	0.280167	-2.56774	0.0102365	0.0357417	129.9	122.182	111.86	94.0416	70.9111	56.0307
Q8TD30	GPT2	Alanine aminotransferase 2 OS=Homo sapiens OX=9606 GN=GPT2 PE=1 SV=1	1519.61	-0.719532	0.607295	0.127212	-5.65615	1.54804e-08	2.11636e-07	1900.99	1877.07	1894.62	1230.54	958.313	1256.11
P30711	GSTT1	Glutathione S-transferase theta-1 OS=Homo sapiens OX=9606 GN=GSTT1 PE=1 SV=4	257.581	-0.722893	0.605881	0.139445	-5.18407	2.17097e-07	2.42987e-06	334.443	314.323	313.607	203.09	174.239	205.785
Q08380	LGALS3BP	Galectin-3-binding protein OS=Homo sapiens OX=9606 GN=LGALS3BP PE=1 SV=1	4214.53	-0.724033	0.605403	0.0455637	-15.8906	7.36685e-57	1.29743e-54	5316.19	5280.42	5154.54	3124.38	3296.35	3115.3
P62877	RBX1	E3 ubiquitin-protein ligase RBX1 OS=Homo sapiens OX=9606 GN=RBX1 PE=1 SV=1	380.027	-0.72447	0.605219	0.137958	-5.25137	1.50973e-07	1.74187e-06	492.455	500.551	427.464	314.139	267.436	278.116
Q7L775	EPM2AIP1	EPM2A-interacting protein 1 OS=Homo sapiens OX=9606 GN=EPM2AIP1 PE=1 SV=1	264.504	-0.725097	0.604956	0.14053	-5.15972	2.47321e-07	2.73239e-06	337.351	346.839	304.618	201.089	212.733	184.392
Q8IXQ6-2	PARP9	Isoform 2 of Protein mono-ADP-ribosyltransferase PARP9 OS=Homo sapiens OX=9606 GN=PARP9	2496.28	-0.727616	0.603901	0.1319	-5.51642	3.45976e-08	4.47453e-07	3161.21	3093.96	3083.13	2049.91	1541.81	2047.67
Q13907-2	IDI1	Isoform 2 of Isopentenyl-diphosphate Delta-isomerase 1 OS=Homo sapiens OX=9606 GN=IDI1	2068.79	-0.729785	0.602994	0.133831	-5.45305	4.95136e-08	6.25501e-07	2655.19	2664.35	2423.96	1751.77	1298.69	1618.78
O75874	IDH1	Isocitrate dehydrogenase [NADP] cytoplasmic OS=Homo sapiens OX=9606 GN=IDH1 PE=1 SV=2	7409.81	-0.7306	0.602653	0.078424	-9.31602	1.20782e-20	4.7897e-19	8876.8	9569.59	9294.34	5169.29	6055.81	5493.04
P57081	WDR4	tRNA (guanine-N(7)-)-methyltransferase non-catalytic subunit WDR4 OS=Homo sapiens OX=9606 GN=WDR4 PE=1 SV=2	725.312	-0.732032	0.602055	0.251587	-2.90966	0.00361822	0.015081	947.104	985.337	784.017	699.309	380.894	555.213
O00233	PSMD9	26S proteasome non-ATPase regulatory subunit 9 OS=Homo sapiens OX=9606 GN=PSMD9 PE=1 SV=3	361.879	-0.733931	0.601263	0.262752	-2.79324	0.00521824	0.0206014	429.444	461.138	465.416	319.141	179.304	316.828
O75368	SH3BGRL	SH3 domain-binding glutamic acid-rich-like protein OS=Homo sapiens OX=9606 GN=SH3BGRL PE=1 SV=1	414.995	-0.734795	0.600903	0.165192	-4.44814	8.6616e-06	7.34641e-05	508.935	531.097	515.354	346.153	251.228	337.203
O76074	PDE5A	cGMP-specific 3',5'-cyclic phosphodiesterase OS=Homo sapiens OX=9606 GN=PDE5A PE=1 SV=2	200.085	-0.734839	0.600885	0.152523	-4.81787	1.45097e-06	1.41736e-05	250.105	260.129	239.699	164.073	137.77	148.736
P58546	MTPN	Myotrophin OS=Homo sapiens OX=9606 GN=MTPN PE=1 SV=2	1791.88	-0.734884	0.600866	0.29017	-2.5326	0.0113219	0.0386477	2282.94	2307.66	2125.33	1703.75	774.957	1556.63
O43252	PAPSS1	Bifunctional 3'-phosphoadenosine 5'-phosphosulfate synthase 1 OS=Homo sapiens OX=9606 GN=PAPSS1 PE=1 SV=2	3970.79	-0.740762	0.598423	0.101453	-7.30151	2.84564e-13	6.73504e-12	4737.46	4579.85	5587.99	2970.31	3119.08	2830.06
O14933	UBE2L6	Ubiquitin/ISG15-conjugating enzyme E2 L6 OS=Homo sapiens OX=9606 GN=UBE2L6 PE=1 SV=4	986.66	-0.741773	0.598004	0.0862273	-8.60253	7.79777e-18	2.57973e-16	1251.5	1236.6	1216.47	719.318	801.295	694.78
P82970	HMGN5	High mobility group nucleosome-binding domain-containing protein 5 OS=Homo sapiens OX=9606 GN=HMGN5 PE=1 SV=1	403.394	-0.743824	0.597154	0.249971	-2.97565	0.00292372	0.0126589	515.721	515.331	484.392	367.162	204.629	333.128
Q8NHU6	TDRD7	Tudor domain-containing protein 7 OS=Homo sapiens OX=9606 GN=TDRD7 PE=1 SV=2	2553.52	-0.752258	0.593674	0.096595	-7.78775	6.8212e-15	1.85661e-13	3331.83	3169.83	3112.1	2072.92	1693.76	1940.7
E9PNI7	PARP10	Poly [ADP-ribose] polymerase OS=Homo sapiens OX=9606 GN=PARP10 PE=1 SV=1	646.837	-0.754656	0.592688	0.0930427	-8.11085	5.02658e-16	1.46825e-14	845.317	777.431	813.979	470.208	510.56	463.526
Q9UFN0	NIPSNAP3A	Protein NipSnap homolog 3A OS=Homo sapiens OX=9606 GN=NIPSNAP3A PE=1 SV=2	71.1842	-0.760238	0.590399	0.307241	-2.4744	0.0133459	0.0444962	94.0318	91.6363	82.896	65.0288	37.4816	56.0307
Q8IY21	DDX60	Probable ATP-dependent RNA helicase DDX60 OS=Homo sapiens OX=9606 GN=DDX60 PE=1 SV=3	583.033	-0.76406	0.588837	0.0956935	-7.98445	1.41152e-15	4.02485e-14	739.652	737.032	725.091	457.202	399.128	440.095
Q9BWD1	ACAT2	Acetyl-CoA acetyltransferase, cytosolic OS=Homo sapiens OX=9606 GN=ACAT2 PE=1 SV=2	4625.47	-0.764353	0.588717	0.0573881	-13.319	1.79444e-40	1.8851e-38	5909.46	5814.47	5744.79	3577.58	3224.43	3482.05
Q6UXH9-2	PAMR1	Isoform 2 of Inactive serine protease PAMR1 OS=Homo sapiens OX=9606 GN=PAMR1	213.68	-0.765025	0.588443	0.20987	-3.64523	0.000267149	0.00160289	270.463	268.012	268.663	174.077	120.549	180.317
Q5K651	SAMD9	Sterile alpha motif domain-containing protein 9 OS=Homo sapiens OX=9606 GN=SAMD9 PE=1 SV=1	2468.39	-0.770979	0.58602	0.0974028	-7.91537	2.46516e-15	6.86575e-14	3058.46	3200.37	3079.14	1792.79	1646.15	2033.4
Q9NPA3	MID1IP1	Mid1-interacting protein 1 OS=Homo sapiens OX=9606 GN=MID1IP1 PE=1 SV=1	303.25	-0.775176	0.584317	0.140825	-5.50453	3.70163e-08	4.74632e-07	397.454	373.443	377.527	233.103	195.512	242.46
Q8NFU3-4	TSTD1	Isoform 4 of Thiosulfate:glutathione sulfurtransferase OS=Homo sapiens OX=9606 GN=TSTD1	1580.81	-0.775956	0.584001	0.11292	-6.87175	6.34187e-12	1.31402e-10	2160.79	1994.32	1832.7	1119.49	1292.61	1084.96
Q9H3Q1	CDC42EP4	Cdc42 effector protein 4 OS=Homo sapiens OX=9606 GN=CDC42EP4 PE=1 SV=1	41.5785	-0.775987	0.583989	0.30079	-2.57983	0.00988485	0.0346955	51.3782	55.1789	50.9361	31.0137	28.3644	32.5997
Q03426	MVK	Mevalonate kinase OS=Homo sapiens OX=9606 GN=MVK PE=1 SV=1	1209.85	-0.784951	0.580372	0.0647468	-12.1234	7.94044e-34	6.42532e-32	1553.95	1527.27	1512.1	919.407	853.972	892.416
Q9ULZ3	PYCARD	Apoptosis-associated speck-like protein containing a CARD OS=Homo sapiens OX=9606 GN=PYCARD PE=1 SV=2	403.46	-0.798429	0.574975	0.162472	-4.91426	8.91163e-07	9.09077e-06	535.109	507.449	494.38	251.111	347.464	285.247
P45877	PPIC	Peptidyl-prolyl cis-trans isomerase C OS=Homo sapiens OX=9606 GN=PPIC PE=1 SV=1	279.927	-0.805545	0.572146	0.290811	-2.76999	0.00560576	0.0218822	374.189	366.545	327.589	239.106	128.653	243.479
Q68CZ2	TNS3	Tensin-3 OS=Homo sapiens OX=9606 GN=TNS3 PE=1 SV=2	123.748	-0.808223	0.571085	0.176571	-4.57733	4.70945e-06	4.23426e-05	151.226	163.566	157.802	87.0385	92.1844	90.6678
Q08AF3	SLFN5	Schlafen family member 5 OS=Homo sapiens OX=9606 GN=SLFN5 PE=1 SV=1	849.236	-0.817552	0.567404	0.0737752	-11.0817	1.54004e-28	9.91588e-27	1105.12	1075	1070.66	612.271	594.64	637.731
Q8N653	LZTR1	Leucine-zipper-like transcriptional regulator 1 OS=Homo sapiens OX=9606 GN=LZTR1 PE=1 SV=2	259.738	-0.839258	0.558931	0.286076	-2.93369	0.00334955	0.0141049	325.718	306.44	367.539	216.096	120.549	222.085
O94875-11	SORBS2	Isoform 11 of Sorbin and SH3 domain-containing protein 2 OS=Homo sapiens OX=9606 GN=SORBS2	1656.38	-0.841879	0.557917	0.0829669	-10.1472	3.41141e-24	1.74594e-22	2155.95	2090.89	2132.33	1120.5	1298.69	1139.97
E7EQR8	YIPF3	Protein YIPF3 OS=Homo sapiens OX=9606 GN=YIPF3 PE=1 SV=1	147.511	-0.846106	0.556284	0.167542	-5.05011	4.41554e-07	4.74691e-06	199.696	189.185	179.775	100.044	110.419	105.949
O00767	SCD	Acyl-CoA desaturase OS=Homo sapiens OX=9606 GN=SCD PE=1 SV=2	641.677	-0.851123	0.554353	0.0900937	-9.44709	3.48391e-21	1.44873e-19	839.501	839.507	797.999	483.214	455.857	433.983
P09493-10	TPM1	Isoform 10 of Tropomyosin alpha-1 chain OS=Homo sapiens OX=9606 GN=TPM1	3301.01	-0.859419	0.551174	0.0556669	-15.4386	9.00179e-54	1.2834e-51	4272.15	4121.66	4374.51	2276.01	2314.74	2447.01
A0A2R8YEM9	TRANK1	TPR and ankyrin repeat-containing protein 1 OS=Homo sapiens OX=9606 GN=TRANK1 PE=1 SV=1	63.7709	-0.866644	0.548421	0.341761	-2.53582	0.0112184	0.0383425	82.399	80.7976	83.8948	34.015	62.807	38.7121
P54687	BCAT1	Branched-chain-amino-acid aminotransferase, cytosolic OS=Homo sapiens OX=9606 GN=BCAT1 PE=1 SV=3	2697.36	-0.874242	0.545541	0.118624	-7.36985	1.70825e-13	4.12461e-12	3670.15	3601.41	3199.99	2127.94	1670.46	1914.21
Q9UI36	DACH1	Dachshund homolog 1 OS=Homo sapiens OX=9606 GN=DACH1 PE=1 SV=4	127.395	-0.890471	0.539438	0.197693	-4.50432	6.65845e-06	5.82907e-05	154.135	156.669	185.767	93.0411	82.0543	92.7053
Q53T59	HS1BP3	HCLS1-binding protein 3 OS=Homo sapiens OX=9606 GN=HS1BP3 PE=1 SV=1	103.964	-0.892847	0.53855	0.198558	-4.49665	6.90325e-06	6.02575e-05	143.471	128.094	133.832	68.0301	73.9502	76.4054
Q15345	LRRC41	Leucine-rich repeat-containing protein 41 OS=Homo sapiens OX=9606 GN=LRRC41 PE=1 SV=3	250.17	-0.910365	0.532051	0.222621	-4.08931	4.32664e-05	0.000319851	364.495	367.531	247.689	186.082	170.187	165.036
Q9BY67-3	CADM1	Isoform 3 of Cell adhesion molecule 1 OS=Homo sapiens OX=9606 GN=CADM1	1457.65	-0.911689	0.531562	0.0750859	-12.1419	6.32994e-34	5.2644e-32	1989.21	1919.44	1801.74	1037.46	1031.25	966.783
P11137	MAP2	Microtubule-associated protein 2 OS=Homo sapiens OX=9606 GN=MAP2 PE=1 SV=4	302.91	-0.913114	0.531038	0.184272	-4.95524	7.22411e-07	7.48408e-06	375.158	365.56	446.44	240.106	177.278	212.916
Q9NSY2	STARD5	StAR-related lipid transfer protein 5 OS=Homo sapiens OX=9606 GN=STARD5 PE=1 SV=2	143.831	-0.914682	0.530461	0.17127	-5.34058	9.26488e-08	1.11179e-06	196.788	180.317	186.766	100.044	106.367	92.7053
Q53EL6	PDCD4	Programmed cell death protein 4 OS=Homo sapiens OX=9606 GN=PDCD4 PE=1 SV=2	1373.84	-0.915862	0.530027	0.121076	-7.56435	3.89794e-14	9.97473e-13	1725.53	1870.17	1791.75	831.368	1080.89	943.352
Q01995	TAGLN	Transgelin OS=Homo sapiens OX=9606 GN=TAGLN PE=1 SV=4	431.328	-0.918351	0.529114	0.103523	-8.87099	7.25006e-19	2.59104e-17	555.466	553.759	583.268	292.129	316.061	287.284
Q9BYX4	IFIH1	Interferon-induced helicase C domain-containing protein 1 OS=Homo sapiens OX=9606 GN=IFIH1 PE=1 SV=3	1312.38	-0.952192	0.516847	0.0610564	-15.5953	7.8383e-55	1.17339e-52	1778.85	1717.44	1694.87	909.402	888.415	885.284
P16403	HIST1H1C	Histone H1.2 OS=Homo sapiens OX=9606 GN=HIST1H1C PE=1 SV=2	1420.4	-0.954269	0.516103	0.174284	-5.47536	4.36618e-08	5.57457e-07	1863.19	1847.51	1910.6	1124.5	737.475	1039.11
Q15043	SLC39A14	Zinc transporter ZIP14 OS=Homo sapiens OX=9606 GN=SLC39A14 PE=1 SV=3	478.75	-0.962501	0.513166	0.0942871	-10.2082	1.82214e-24	9.57102e-23	644.651	642.44	611.233	332.147	321.126	320.903
O95786	DDX58	Probable ATP-dependent RNA helicase DDX58 OS=Homo sapiens OX=9606 GN=DDX58 PE=1 SV=2	4627.65	-0.976458	0.508226	0.105513	-9.25442	2.15388e-20	8.37495e-19	5371.45	6555.45	6482.87	3161.4	2919.51	3275.25
P00973	OAS1	2'-5'-oligoadenylate synthase 1 OS=Homo sapiens OX=9606 GN=OAS1 PE=1 SV=4	583.402	-0.986157	0.504821	0.323035	-3.05279	0.00226726	0.0101392	796.847	794.182	735.078	278.123	595.653	300.528
Q9H008	LHPP	Phospholysine phosphohistidine inorganic pyrophosphate phosphatase OS=Homo sapiens OX=9606 GN=LHPP PE=1 SV=2	506.133	-0.986332	0.504759	0.105059	-9.38834	6.09539e-21	2.48294e-19	689.244	696.633	632.207	336.149	358.608	323.959
P32929	CTH	Cystathionine gamma-lyase OS=Homo sapiens OX=9606 GN=CTH PE=1 SV=3	2549.18	-1.01107	0.496177	0.160521	-6.29871	3.0014e-10	5.21699e-09	3418.11	3430.94	3373.77	1937.86	1308.82	1825.58
P38571	LIPA	Lysosomal acid lipase/cholesteryl ester hydrolase OS=Homo sapiens OX=9606 GN=LIPA PE=1 SV=2	466.643	-1.0191	0.493426	0.323063	-3.15448	0.00160783	0.00760712	625.263	652.293	597.251	390.173	173.226	361.652
Q9Y6K5	OAS3	2'-5'-oligoadenylate synthase 3 OS=Homo sapiens OX=9606 GN=OAS3 PE=1 SV=3	4135.67	-1.02642	0.490926	0.0742294	-13.8277	1.73463e-43	2.07739e-41	5709.77	5571.1	5362.27	2617.16	2598.39	2955.36
O95994	AGR2	Anterior gradient protein 2 homolog OS=Homo sapiens OX=9606 GN=AGR2 PE=1 SV=1	262.849	-1.03022	0.489634	0.128044	-8.04583	8.56624e-16	2.49003e-14	371.28	346.839	340.573	178.079	169.174	171.148
P02452	COL1A1	Collagen alpha-1(I) chain OS=Homo sapiens OX=9606 GN=COL1A1 PE=1 SV=5	220.406	-1.03583	0.487736	0.153324	-6.75582	1.42025e-11	2.87313e-10	295.667	294.616	298.625	153.068	125.614	154.848
Q01581	HMGCS1	Hydroxymethylglutaryl-CoA synthase, cytoplasmic OS=Homo sapiens OX=9606 GN=HMGCS1 PE=1 SV=2	5035.22	-1.03819	0.486937	0.0477547	-21.7401	8.56637e-105	3.9458e-102	6889.53	6892.43	6535.8	3378.49	3210.25	3304.79
P05161	ISG15	Ubiquitin-like protein ISG15 OS=Homo sapiens OX=9606 GN=ISG15 PE=1 SV=5	2422.85	-1.03891	0.486694	0.0580732	-17.8897	1.41796e-71	3.39631e-69	3254.28	3218.11	3305.85	1634.72	1500.28	1623.87
P08243	ASNS	Asparagine synthetase [glutamine-hydrolyzing] OS=Homo sapiens OX=9606 GN=ASNS PE=1 SV=4	3192.61	-1.04468	0.484754	0.0529382	-19.7339	1.10357e-86	3.6712e-84	4368.12	4311.83	4221.71	2168.96	1997.67	2087.4
Q8N2S1	LTBP4	Latent-transforming growth factor beta-binding protein 4 OS=Homo sapiens OX=9606 GN=LTBP4 PE=1 SV=2	22.8351	-1.05557	0.481107	0.431563	-2.44592	0.0144481	0.0472761	31.9902	31.5308	28.9637	11.0049	17.2213	16.2998
C9JME2	FARP1	FERM, ARHGEF and pleckstrin domain-containing protein 1 OS=Homo sapiens OX=9606 GN=FARP1 PE=1 SV=2	34.4406	-1.0684	0.476848	0.347279	-3.07649	0.00209456	0.00949448	39.7454	50.2522	49.9374	22.0097	22.2863	22.4123
P15428	HPGD	15-hydroxyprostaglandin dehydrogenase [NAD(+)] OS=Homo sapiens OX=9606 GN=HPGD PE=1 SV=1	692.983	-1.09118	0.469379	0.106966	-10.2011	1.95963e-24	1.01158e-22	950.012	954.792	924.84	414.183	494.352	419.721
P14621	ACYP2	Acylphosphatase-2 OS=Homo sapiens OX=9606 GN=ACYP2 PE=1 SV=2	770.384	-1.09304	0.468772	0.0957862	-11.4113	3.6739e-30	2.47184e-28	1109.96	1056.28	980.77	504.223	504.482	466.583
P20592	MX2	Interferon-induced GTP-binding protein Mx2 OS=Homo sapiens OX=9606 GN=MX2 PE=1 SV=1	2377.05	-1.1016	0.465999	0.190773	-5.77441	7.72212e-09	1.09834e-07	3114.68	3427	3187	1276.56	1962.21	1294.82
Q13563	PKD2	Polycystin-2 OS=Homo sapiens OX=9606 GN=PKD2 PE=1 SV=3	45.0181	-1.12489	0.458536	0.29871	-3.76584	0.00016599	0.00105739	57.1946	61.0909	66.9161	28.0124	27.3514	29.5434
H0YI09	METTL7A	Methyltransferase-like protein 7A (Fragment) OS=Homo sapiens OX=9606 GN=METTL7A PE=1 SV=1	109.807	-1.14531	0.452092	0.192002	-5.9651	2.44477e-09	3.69679e-08	153.165	150.757	149.812	73.0323	63.82	68.2555
P19474	TRIM21	E3 ubiquitin-protein ligase TRIM21 OS=Homo sapiens OX=9606 GN=TRIM21 PE=1 SV=1	817.703	-1.16837	0.444922	0.267416	-4.36913	1.24741e-05	0.000102462	1098.33	1170.58	1126.59	575.254	314.035	621.431
P17252	PRKCA	Protein kinase C alpha type OS=Homo sapiens OX=9606 GN=PRKCA PE=1 SV=4	2341.83	-1.17535	0.442777	0.0477329	-24.6235	7.08019e-134	8.47923e-131	3277.54	3270.33	3191	1464.65	1431.39	1416.05
Q9UHI5	SLC7A8	Large neutral amino acids transporter small subunit 2 OS=Homo sapiens OX=9606 GN=SLC7A8 PE=1 SV=1	1519.34	-1.20383	0.434121	0.147298	-8.17278	3.01365e-16	8.84594e-15	2043.5	2095.81	2217.22	953.422	748.619	1057.45
P48539	PCP4	Calmodulin regulator protein PCP4 OS=Homo sapiens OX=9606 GN=PCP4 PE=1 SV=3	1862.59	-1.31652	0.401503	0.0563047	-23.382	6.51131e-121	4.33219e-118	2667.79	2726.43	2579.76	1084.48	1053.54	1063.56
P02461	COL3A1	Collagen alpha-1(III) chain OS=Homo sapiens OX=9606 GN=COL3A1 PE=1 SV=4	206.02	-1.33092	0.397516	0.410327	-3.24355	0.00118049	0.00588572	284.034	279.836	320.598	75.0332	85.0933	191.523
P09913	IFIT2	Interferon-induced protein with tetratricopeptide repeats 2 OS=Homo sapiens OX=9606 GN=IFIT2 PE=1 SV=1	1013.52	-1.43509	0.369823	0.0789971	-18.1664	9.52449e-74	2.47968e-71	1495.78	1461.25	1482.14	514.227	545.002	582.719
P09914	IFIT1	Interferon-induced protein with tetratricopeptide repeats 1 OS=Homo sapiens OX=9606 GN=IFIT1 PE=1 SV=2	2606.21	-1.64911	0.318837	0.129409	-12.7434	3.39304e-37	3.12577e-35	3969.69	3961.05	3926.08	1158.51	1498.25	1123.67
Q00978	IRF9	Interferon regulatory factor 9 OS=Homo sapiens OX=9606 GN=IRF9 PE=1 SV=1	985.213	-1.72424	0.302657	0.0716107	-24.078	4.24958e-128	4.24108e-125	1551.04	1501.65	1485.14	461.204	457.883	454.358
O14879	IFIT3	Interferon-induced protein with tetratricopeptide repeats 3 OS=Homo sapiens OX=9606 GN=IFIT3 PE=1 SV=1	3079.49	-1.84011	0.279301	0.0669093	-27.5015	1.68403e-166	3.36133e-163	4770.42	4569.01	5103.6	1330.59	1330.09	1373.26
P20591	MX1	Interferon-induced GTP-binding protein Mx1 OS=Homo sapiens OX=9606 GN=MX1 PE=1 SV=4	6507.52	-2.03518	0.243978	0.0982634	-20.7115	2.7301e-95	1.08986e-92	9900.49	9691.77	11795.2	2648.17	2458.59	2550.92
A0A087X0V5	OAS2	2'-5'-oligoadenylate synthase 2 OS=Homo sapiens OX=9606 GN=OAS2 PE=1 SV=1	1590.54	-2.04675	0.242028	0.0587737	-34.8243	1.04399e-265	3.12571e-262	2587.33	2521.48	2574.77	616.272	626.044	617.356
Q9UM22	EPDR1	Mammalian ependymin-related protein 1 OS=Homo sapiens OX=9606 GN=EPDR1 PE=1 SV=2	41.6978	-2.09279	0.234426	0.361483	-5.78947	7.06077e-09	1.01391e-07	71.7356	67.0029	63.9198	13.0058	20.2603	14.2623
P05165	PCCA	Propionyl-CoA carboxylase alpha chain, mitochondrial OS=Homo sapiens OX=9606 GN=PCCA PE=1 SV=4	32.6129	-2.23081	0.213039	0.400139	-5.5751	2.47392e-08	3.27016e-07	57.1946	56.1642	47.9399	11.0049	10.1302	13.2436
Q96C10	DHX58	Probable ATP-dependent RNA helicase DHX58 OS=Homo sapiens OX=9606 GN=DHX58 PE=1 SV=1	23.7197	-2.51287	0.175206	0.477612	-5.26133	1.43015e-07	1.65964e-06	37.8066	43.3548	39.9499	8.00354	7.09111	6.11244

## Sheet: SILAC
Supplementary Table Information on peptides with SILAC-modified proteins that interact with ITGB1
Checked	Confidence	Annotated Sequence	Modifications	Modifications in Master Proteins	Qvality PEP	Qvality q-value	# Protein Groups	# Proteins	# PSMs	Master Protein Accessions	Positions in Master Proteins	# Missed Cleavages	Theo. MH+ [Da]	Confidence (by Search Engine): Sequest HT	Percolator q-Value (by Search Engine): Sequest HT	Percolator PEP (by Search Engine): Sequest HT	XCorr (by Search Engine): Sequest HT
FALSE	High	[R].LADKNKIYESIEEAK.[S]	2xLabel:13C(6) [K4(100); K6(100)]		0.0923401	0.00598592	1	1	1	O75116	O75116 [715-729]	2	1762.96	High	0.004795	0.07233	2.16
FALSE	High	[K].TKEEMIVATSQTSQYGGDLTNTFGAIQYAR.[K]	1xLabel:13C(6) [K2(100)]		0.00168174	0.0002441	1	1	1	P17301	P17301 [231-260]	1	3286.6	High	0.0001452	0.001028	3.21
FALSE	High	[R].EKIAAKNALESYAFNMK.[S]	1xOxidation [M16(100)]; 2xLabel:13C(6) [K2(100); K6(100)]		0.0500549	0.00382673	1	1	1	P34931	P34931 [536-552]	2	1956.03	High	0.002751	0.03613	1.53
FALSE	High	[R].QRALLEQK.[Q]	1xLabel:13C(6) [R2(100)]		0.160915	0.00968099	1	1	1	P50607	P50607 [30-37]	1	991.599	High	0.00812	0.1277	1.03
FALSE	High	[K].DKLECELEALVGRMEAK.[A]	1xCarbamidomethyl [C5]; 1xLabel:13C(6) [K2(100)]		0.0196043	0.00171079	1	1	1	Q86XR8	Q86XR8 [395-411]	2	1997.01	High	0.001335	0.01331	3.24
FALSE	High	[K].LRAHQVDVDPDFAPQSRPR.[S]	1xLabel:13C(6) [R]		0.0399734	0.00207952	1	1	1	A8MYZ6	A8MYZ6 [5-23]	1	2210.15	High	0.001505	0.02294	1.36
FALSE	High	[R].KESYSVYVYK.[V]	2xLabel:13C(6) [K1(100); K10(100)]		0.00016196	0	1	9	1	O60814	O60814 [35-44]	1	1277.68	High	0	4.991e-05	2.2
FALSE	High	[K].LIRIRNPWGEVEWTGR.[W]	2xLabel:13C(6) [R3(100); R5(100)]		0.137232	0.0072594	1	1	1	P17655	P17655 [281-296]	2	1994.11	High	0.005743	0.09283	1.56
FALSE	High	[K].NYQKSLIDLNK.[V]	1xLabel:13C(6) [K4(100)]		0.141547	0.00753009	1	1	1	Q07617	Q07617 [706-716]	1	1341.75	High	0.005995	0.09558	1.46
FALSE	High	[RP].EVDVNLPKADIDVSGPK.[V]	1xLabel:13C(6) [K8(100)]		0.121106	0.00638669	1	1	1	Q09666	Q09666 [1273-1289]; [3169-3185]; [3951-3967]; [4079-4095]	1	1801.96	High	0.005004	0.08019	1.4
FALSE	High	[K].LYIRDILDMK.[E]	1xOxidation [M9(100)]; 1xLabel:13C(6) [R4(100)]		0.162461	0.00896939	1	1	1	Q9H668	Q9H668 [29-38]	1	1301.72	High	0.007079	0.112	1.98
FALSE	High	[R].RPMPWLLLLPLLLLLLLLLPGPAASQLR.[Y]	1xOxidation [M3(100)]; 2xLabel:13C(6) [R1(100); R28(100)]		0.0545594	0.00274114	1	1	1	Q9Y5I4	Q9Y5I4 [18-45]	0	3159	High	0.002173	0.03269	0.12
FALSE	High	[R].FLKSELENIK.[G]	1xLabel:13C(6) [K3(100)]		0.130617	0.00789678	1	1	1	O95470	O95470 [429-438]	1	1226.71	High	0.00627	0.09431	2.05
FALSE	High	[K].SRWQQGNVFSCSVMHEALHNHYTQK.[S]	1xCarbamidomethyl [C11]; 1xLabel:13C(6) [R2(100)]		0.00244248	0.000215563	2	2	1	P01857; P01859	P01857 [298-322]; P01859 [294-318]	1	3050.42	High	0.0001436	0.001618	2.67
FALSE	High	[K].NLLIQNKPGDDPNK.[I]	1xLabel:13C(6) [K7(100)]		0.14149	0.00833413	1	1	1	P35658	P35658 [66-79]	0	1571.85	High	0.006638	0.102	1.86
FALSE	High	[K].VQIAANEETQEREEQMK.[E]	1xOxidation [M16(100)]; 2xLabel:13C(6) [R12(100); K17(100)]		0.0421261	0.00315173	1	1	1	P49321	P49321 [456-472]	1	2061	High	0.002395	0.0313	2.03
FALSE	High	[R].AWEAEKYNEIR.[T]	1xLabel:13C(6) [K6(100)]		0.0783777	0.0048058	1	1	1	Q5VU43	Q5VU43 [420-430]	1	1414.71	High	0.003945	0.05767	0.96
FALSE	High	[K].IDAERQAAAAACQLFK.[G]	1xCarbamidomethyl [C12]; 1xLabel:13C(6) [R5(100)]		0.0211819	0.00177226	1	1	1	Q7L2E3	Q7L2E3 [107-122]	1	1768.91	High	0.00132	0.01543	2.16
FALSE	High	[R].QEMFPHDPAEALCRAFRVTDER.[F]	1xCarbamidomethyl [C13]; 1xLabel:13C(6) [R17(99)]		0.106488	0.0063508	1	1	1	Q8WY54	Q8WY54 [295-316]	2	2681.27	High	0.005214	0.07794	1.3
FALSE	High	[K].QKELEDAYWKDDDK.[H]	1xLabel:13C(6) [K10(100)]		0.149077	0.00882992	1	1	1	Q96CT7	Q96CT7 [31-44]	2	1788.84	High	0.007035	0.1079	1.62
FALSE	High	[K].FLLNFGTVSFYLGYNAMQDFFPTMSMKPNPQCDDR.[N]	1xCarbamidomethyl [C32]; 2xOxidation [M]; 1xLabel:13C(6) [K27(99.9)]		0.127124	0.00766877	1	1	2	Q9GZZ9	Q9GZZ9 [272-306]	0	4189.89	High	0.006121	0.09198	0.6
FALSE	High	[R].LGLLMMILGLIYMRGNSAREAQVWEMLR.[R]	2xOxidation [M5(100); M6(100)]; 1xLabel:13C(6) [R]		0.118125	0.00713785	1	1	1	Q9HAY2	Q9HAY2 [167-194]	2	3302.73	High	0.005742	0.08589	2.31
FALSE	High	[K].EEPASGKMQGTLEDQIISANPLLEAFGNAK.[T]	1xLabel:13C(6) [K7(100)]		0.104465	0.00625462	1	1	1	Q9Y623	Q9Y623 [208-237]	1	3164.59	High	0.005117	0.07632	2.85
